# Supplementary material for: Synthesis of enantiomerically enriched indolines and tetrahydroisoquinolines from (S)-amino acid-derived chiral carbocations: an easy access to (3S,4R)-demethoxy-3-isopropyl diclofensine
Source: Royal Society of Chemistry journal article supplement (doi:10.1039/c4ob00922c), 2014-01-01
Supplement: c4ob00922c1.pdf [file c4ob00922c1.pdf]

# Supporting Information

## Synthesis of Enantiomerically Enriched Indolines and Tetrahydro-isoquinolines from (*S*)-Amino Acid-Derived Chiral Carbocations: An Easy Access to (*3S,4R*)-Demethoxy-3-isopropyl Diclofensine

Sudipta Kumar Manna<sup>a</sup> and Gautam Panda<sup>a,b\*</sup>

<sup>a</sup>*Medicinal and Process Chemistry Division, CSIR-Central Drug Research Institute, BS 10/1, Jankipuram Extension, Sitapur Road, Lucknow 226031, India.*

<sup>b</sup>*Academy of Scientific and Innovative Research, New Delhi 110001, India.*

Fax: +91-522-2771941; Phone: +91-522-2772450, 2772550, Ext 4661, 4662

E-mail : [gautam.panda@gmail.com](mailto:gautam.panda@gmail.com); [gautam\\_panda@cdri.res.in](mailto:gautam_panda@cdri.res.in)

|             |        |
|-------------|--------|
| 1. Contents | 1-12   |
| 2. Spectra  | 13-205 |

**Figure 1:** <sup>1</sup>H -NMR Spectrum of **6a**.

**Figure 2:** <sup>13</sup>C -NMR Spectrum of **6a**.

**Figure 3:** <sup>1</sup>H -NMR Spectrum of **6b<sub>1</sub>**.

**Figure 4:** <sup>13</sup>C -NMR Spectrum of **6b<sub>1</sub>**.

**Figure 5:** <sup>1</sup>H -NMR Spectrum of **6b<sub>2</sub>**.

**Figure 6:**  $^{13}\text{C}$  -NMR Spectrum of **6b<sub>2</sub>**.

**Figure 7:**  $^1\text{H}$  -NMR Spectrum of **6c**.

**Figure 8:**  $^{13}\text{C}$  -NMR Spectrum of **6c**.

**Figure 9:**  $^1\text{H}$  -NMR Spectrum of **6d**.

**Figure 10:**  $^{13}\text{C}$  -NMR Spectrum of **6d**.

**Figure 11:**  $^1\text{H}$ -NMR Spectrum of **6e**.

**Figure 12:**  $^{13}\text{C}$  -NMR Spectrum of **6e**.

**Figure 13:**  $^1\text{H}$  -NMR Spectrum of **6f**.

**Figure 14:**  $^{13}\text{C}$  -NMR Spectrum of **6f**.

**Figure 15:**  $^1\text{H}$  -NMR Spectrum of **6g**.

**Figure 16:**  $^{13}\text{C}$  -NMR Spectrum of **6g**.

**Figure 17:**  $^1\text{H}$  -NMR Spectrum of **6h**.

**Figure 18:**  $^{13}\text{C}$  -NMR Spectrum of **6h**.

**Figure 19:**  $^1\text{H}$  -NMR Spectrum of **6i**.

**Figure 20:**  $^{13}\text{C}$  -NMR Spectrum of **6i**.

**Figure 21:**  $^1\text{H}$  -NMR Spectrum of **6j**.

**Figure 22:**  $^{13}\text{C}$  -NMR Spectrum of **6j**.

**Figure 23:**  $^1\text{H}$  -NMR Spectrum of **8a**.

**Figure 24:**  $^{13}\text{C}$  -NMR Spectrum of **8a**.

**Figure 25:**  $^1\text{H}$  -NMR Spectrum of **8b**.

**Figure 26:**  $^{13}\text{C}$  -NMR Spectrum of **8b**.

**Figure 27:**  $^1\text{H}$  -NMR Spectrum of **8c**.

**Figure 28:**  $^{13}\text{C}$  -NMR Spectrum of **8c**.

**Figure 29:**  $^1\text{H}$  -NMR Spectrum of **8d**.

**Figure 30:**  $^{13}\text{C}$  -NMR Spectrum of **8d**.

**Figure 31:**  $^1\text{H}$  -NMR Spectrum of **8e<sub>1</sub>**.

**Figure 32:**  $^{13}\text{C}$  -NMR Spectrum of **8e<sub>1</sub>**.

**Figure 33:**  $^1\text{H}$  -NMR Spectrum of **8e<sub>2</sub>**.

**Figure 34:**  $^{13}\text{C}$  -NMR Spectrum of **8e<sub>2</sub>**.

**Figure 35:**  $^1\text{H}$  -NMR Spectrum of **8f**.

**Figure 36:**  $^{13}\text{C}$  -NMR Spectrum of **8f**.

**Figure 37:**  $^1\text{H}$  -NMR Spectrum of **8g**.

**Figure 38:**  $^{13}\text{C}$  -NMR Spectrum of **8g**.

**Figure 39:**  $^1\text{H}$  -NMR Spectrum of **8h**.

**Figure 40:**  $^{13}\text{C}$  -NMR Spectrum of **8h**.

**Figure 41:**  $^1\text{H}$  -NMR Spectrum of **8i**.

**Figure 42:**  $^{13}\text{C}$  -NMR Spectrum of **8i**.

**Figure 43:**  $^1\text{H}$  -NMR Spectrum of **8j**.

**Figure 44:**  $^{13}\text{C}$  -NMR Spectrum of **8j**.

**Figure 45:**  $^1\text{H}$  -NMR Spectrum of **8k**.

**Figure 46:**  $^{13}\text{C}$  -NMR Spectrum of **8k**.

**Figure 47:**  $^1\text{H}$  -NMR Spectrum of **8l**.

**Figure 48:**  $^{13}\text{C}$  -NMR Spectrum of **8l**.

**Figure 49:**  $^1\text{H}$  -NMR Spectrum of **8m**.

**Figure 50:**  $^{13}\text{C}$  -NMR Spectrum of **8m**.

**Figure 51:**  $^1\text{H}$  -NMR Spectrum of **8n**.

**Figure 52:**  $^{13}\text{C}$  -NMR Spectrum of **8n**.

**Figure 53:**  $^1\text{H}$  -NMR Spectrum of **8o**.

**Figure 54:**  $^{13}\text{C}$  -NMR Spectrum of **8o**.

**Figure 55:**  $^1\text{H}$  -NMR Spectrum of **8p**.

**Figure 56:**  $^{13}\text{C}$ -NMR Spectrum of **8p**.

**Figure 57:**  $^1\text{H}$ -NMR Spectrum of **8q**.

**Figure 58:**  $^{13}\text{C}$ -NMR Spectrum of **8q**.

**Figure 59:**  $^1\text{H}$  -NMR Spectrum of **8r**.

**Figure 60:**  $^{13}\text{C}$  -NMR Spectrum of **8r**.

**Figure 61:**  $^1\text{H}$  -NMR Spectrum of **8s**.

**Figure 62:**  $^{13}\text{C}$  -NMR Spectrum of **8s**.

**Figure 63:**  $^1\text{H}$  -NMR Spectrum of **10a**.

**Figure 64:**  $^{13}\text{C}$  -NMR Spectrum of **10a**.

**Figure 65:**  $^1\text{H}$ -NMR Spectrum of **10b**.

**Figure 66:**  $^{13}\text{C}$  -NMR Spectrum of **10b**.

**Figure 67:**  $^1\text{H}$  -NMR Spectrum of **10c**.

**Figure 68:**  $^{13}\text{C}$  -NMR Spectrum of **10c**.

**Figure 69:**  $^1\text{H}$  -NMR Spectrum of **10d**.

**Figure 70:**  $^{13}\text{C}$  -NMR Spectrum of **10d**.

**Figure 71:**  $^1\text{H}$  -NMR Spectrum of **10e**.

**Figure 72:**  $^{13}\text{C}$  -NMR Spectrum of **10e**.

**Figure 73:**  $^1\text{H}$  -NMR Spectrum of **10f**.

**Figure 74:**  $^{13}\text{C}$  -NMR Spectrum of **10f**.  
**Figure 75:**  $^1\text{H}$  -NMR Spectrum of **10g**.  
**Figure 76:**  $^{13}\text{C}$  -NMR Spectrum of **10g**.  
**Figure 77:**  $^1\text{H}$  -NMR Spectrum of **10h**.  
**Figure 78:**  $^{13}\text{C}$  -NMR Spectrum of **10h**.  
**Figure 79:**  $^1\text{H}$  -NMR Spectrum of **11a**.  
**Figure 80:**  $^{13}\text{C}$  -NMR Spectrum of **11a**.  
**Figure 81 :** DEPT-I -Spectrum of **11a**.  
**Figure 82:** DEPT-II -Spectrum of **11a**.  
**Figure 83:** COSY -Spectrum of **11a**.  
**Figure 84:** COSY -Spectrum of **11a**. (selected portion).  
**Figure 85:** HPLC -Spectrum of **11a**.  
**Figure 86:**  $^1\text{H}$  -NMR Spectrum of **11b**.  
**Figure 87:**  $^{13}\text{C}$  -NMR Spectrum of **11b**.  
**Figure 88:** HPLC -Spectrum of **11b**.  
**Figure 89:**  $^1\text{H}$  -NMR Spectrum of **11c**.  
**Figure 90:**  $^{13}\text{C}$  -NMR Spectrum of **11c**.

**Figure 91:** HPLC -Spectrum of **11c**.  
**Figure 92:**  $^1\text{H}$  -NMR Spectrum of **11d**.  
**Figure 93:**  $^{13}\text{C}$  -NMR Spectrum of **11d**.  
**Figure 94:** HPLC -Spectrum of **11d**.  
**Figure 95:**  $^1\text{H}$  -NMR Spectrum of **11e<sub>1</sub>**.  
**Figure 96:**  $^{13}\text{C}$  -NMR Spectrum of **11e<sub>1</sub>**.  
**Figure 97:** COSY -Spectrum of **11e<sub>1</sub>**.  
**Figure 98:** NOESY -Spectrum of **11e<sub>1</sub>**.  
**Figure 99:** HPLC -Spectrum of **11e<sub>1</sub>**.  
**Figure 100:**  $^1\text{H}$  -NMR Spectrum of **11e<sub>2</sub>**.  
**Figure 101:**  $^{13}\text{C}$  -NMR Spectrum of **11e<sub>2</sub>**.  
**Figure 102:** DEPT-I -Spectrum of **11e<sub>2</sub>**.  
**Figure 103:** DEPT-II -Spectrum of **11e<sub>2</sub>**.  
**Figure 104:** HSQC -Spectrum of **11e<sub>2</sub>**.  
**Figure 105:** COSY -Spectrum of **11e<sub>2</sub>**.  
**Figure 106:** NOESY -Spectrum of **11e<sub>2</sub>**.  
**Figure 107:** HPLC -Spectrum of **11e<sub>2</sub>**.

**Figure 108:**  $^1\text{H}$  -NMR Spectrum of **11f**.

**Figure 109:**  $^{13}\text{C}$  -NMR Spectrum of **11f**.

**Figure 110:** HPLC -Spectrum of **11f**.

**Figure 111:**  $^1\text{H}$  -NMR Spectrum of **11g**.

**Figure 112:**  $^{13}\text{C}$  -NMR Spectrum of **11g**.

**Figure 113:** DEPT-I -Spectrum of **11g**.

**Figure 114:** DEPT-II -Spectrum of **11g**.

**Figure 115:** HSQC -Spectrum of **11g**.

**Figure 116:** COSY -Spectrum of **11g**.

**Figure 117:** NOESY -Spectrum of **11g**.

**Figure 118:** HPLC -Spectrum of **11g**.

**Figure 119:**  $^1\text{H}$  -NMR Spectrum of **11h**.

**Figure 120:**  $^{13}\text{C}$  -NMR Spectrum of **11h**.

**Figure 121:** HPLC -Spectrum of **11h**.

**Figure 122:**  $^1\text{H}$  -NMR Spectrum of **11i**.

**Figure 123:**  $^{13}\text{C}$ -NMR Spectrum of **11i**.

**Figure 124:**  $^1\text{H}$  -NMR Spectrum of **11j**.



**Figure 125:**  $^{13}\text{C}$ -NMR Spectrum of **11j**.

**Figure 126:** HPLC -Spectrum of **11j**.

**Figure 127:**  $^1\text{H}$  -NMR Spectrum of **11k**.

**Figure 128:**  $^{13}\text{C}$ -NMR Spectrum of **11k**.

**Figure 129:** HPLC -Spectrum of **11k**.

**Figure 130:**  $^1\text{H}$  -NMR Spectrum of **11l**.

**Figure 131:**  $^{13}\text{C}$  -NMR Spectrum of **11l**.

**Figure 132:** HPLC -Spectrum of **11l**.

**Figure 133:**  $^1\text{H}$  -NMR Spectrum of **11m**.

**Figure 134:**  $^{13}\text{C}$ -NMR Spectrum of **11m**.

**Figure 135:** HPLC -Spectrum of **11m**.

**Figure 136:**  $^1\text{H}$  -NMR Spectrum of **11n**.

**Figure 137:**  $^{13}\text{C}$ -NMR Spectrum of **11n**.

**Figure 138:** HPLC -Spectrum of **11n**.

**Figure 139:**  $^1\text{H}$  -NMR Spectrum of **11o**.

**Figure 140:**  $^{13}\text{C}$ -NMR Spectrum of **11o**.

**Figure 141:** HPLC -Spectrum of **11o**.

**Figure 142:**  $^1\text{H}$  -NMR Spectrum of **11p**.

**Figure 143:**  $^{13}\text{C}$ -NMR Spectrum of **11p**.

**Figure 144:** HPLC -Spectrum of **11p**.

**Figure 145:**  $^1\text{H}$  -NMR Spectrum of **11q**.

**Figure 146:**  $^{13}\text{C}$  -NMR Spectrum of **11q**.

**Figure 147:** HPLC -Spectrum of **11q**.

**Figure 148:**  $^1\text{H}$  -NMR Spectrum of **11r**.

**Figure 149:**  $^{13}\text{C}$ -NMR Spectrum of **11r**.

**Figure 150:** HPLC -Spectrum of **11r**.

**Figure 151:**  $^1\text{H}$  -NMR Spectrum of **11s**.

**Figure 152:**  $^{13}\text{C}$ -NMR Spectrum of **11s**.

**Figure 153:** HPLC -Spectrum of **11s**.

**Figure 154:**  $^1\text{H}$  -NMR Spectrum of **12a**.

**Figure 155:**  $^{13}\text{C}$ -NMR Spectrum of **12a**.

**Figure 156:**  $^1\text{H}$  -NMR Spectrum of **112b**.

**Figure 157:**  $^{13}\text{C}$ -NMR Spectrum of **12b**.

**Figure 158:** HPLC -Spectrum of **12b**.

**Figure 159:**  $^1\text{H}$  -NMR Spectrum of **12c<sub>1</sub>**.

**Figure 160:**  $^{13}\text{C}$  -NMR Spectrum of **12c<sub>1</sub>**.

**Figure 161:** DEPT-I -Spectrum of **12c<sub>1</sub>**.

**Figure 162:** DEPT-II -Spectrum of **12c<sub>1</sub>**.

**Figure 163:** COSY -Spectrum of **12c<sub>1</sub>**.

**Figure 164:** HPLC -Spectrum of **12c<sub>1</sub>**.

**Figure 165:**  $^1\text{H}$  -NMR Spectrum of **12c**.

**Figure 166:**  $^{13}\text{C}$  -NMR Spectrum of **12c**.

**Figure 167:** DEPT-I -Spectrum of **12c**.

**Figure 168:** DEPT-II -Spectrum of **12c**.

**Figure 169:** COSY -Spectrum of **12c**.

**Figure 170:** HPLC -Spectrum of **12c**.

**Figure 171:**  $^1\text{H}$  -NMR Spectrum of **12d**.

**Figure 172:**  $^{13}\text{C}$  -NMR Spectrum of **12d**.

**Figure 173:** DEPT-I -Spectrum of **12d**.

**Figure 174:** DEPT-II -Spectrum of **12d**.

**Figure 175:** HSQC -Spectrum of **12d**.

**Figure 176:** HMBC -Spectrum of **12d**.  
**Figure 177:** COSY -Spectrum of **12d**.  
**Figure 178:** NOESY -Spectrum of **12d**.  
**Figure 179:** HPLC -Spectrum of **12d**.  
**Figure 180:**  $^1\text{H}$  -NMR Spectrum of **12e**.  
**Figure 181:**  $^{13}\text{C}$  -NMR Spectrum of **12e**.  
**Figure 182:** HPLC -Spectrum of **12e**.  
**Figure 183:**  $^1\text{H}$  -NMR Spectrum of **12f**.  
**Figure 184:**  $^{13}\text{C}$ -NMR Spectrum of **12f**.  
**Figure 185:** HPLC -Spectrum of **12f**.  
**Figure 186:**  $^1\text{H}$  -NMR Spectrum of **12g**.  
**Figure 187:**  $^{13}\text{C}$  -NMR Spectrum of **12g**.  
**Figure 188:** HPLC -Spectrum of **12g**.  
**Figure 189:**  $^1\text{H}$  -NMR Spectrum of **12h**.  
**Figure 190:**  $^{13}\text{C}$  -NMR Spectrum of **12h**.  
**Figure 191:** HPLC -Spectrum of **12h**.  
**Figure 192:**  $^1\text{H}$  -NMR Spectrum of **13a**.  
**Figure 193:**  $^{13}\text{C}$  -NMR Spectrum of **13a**.

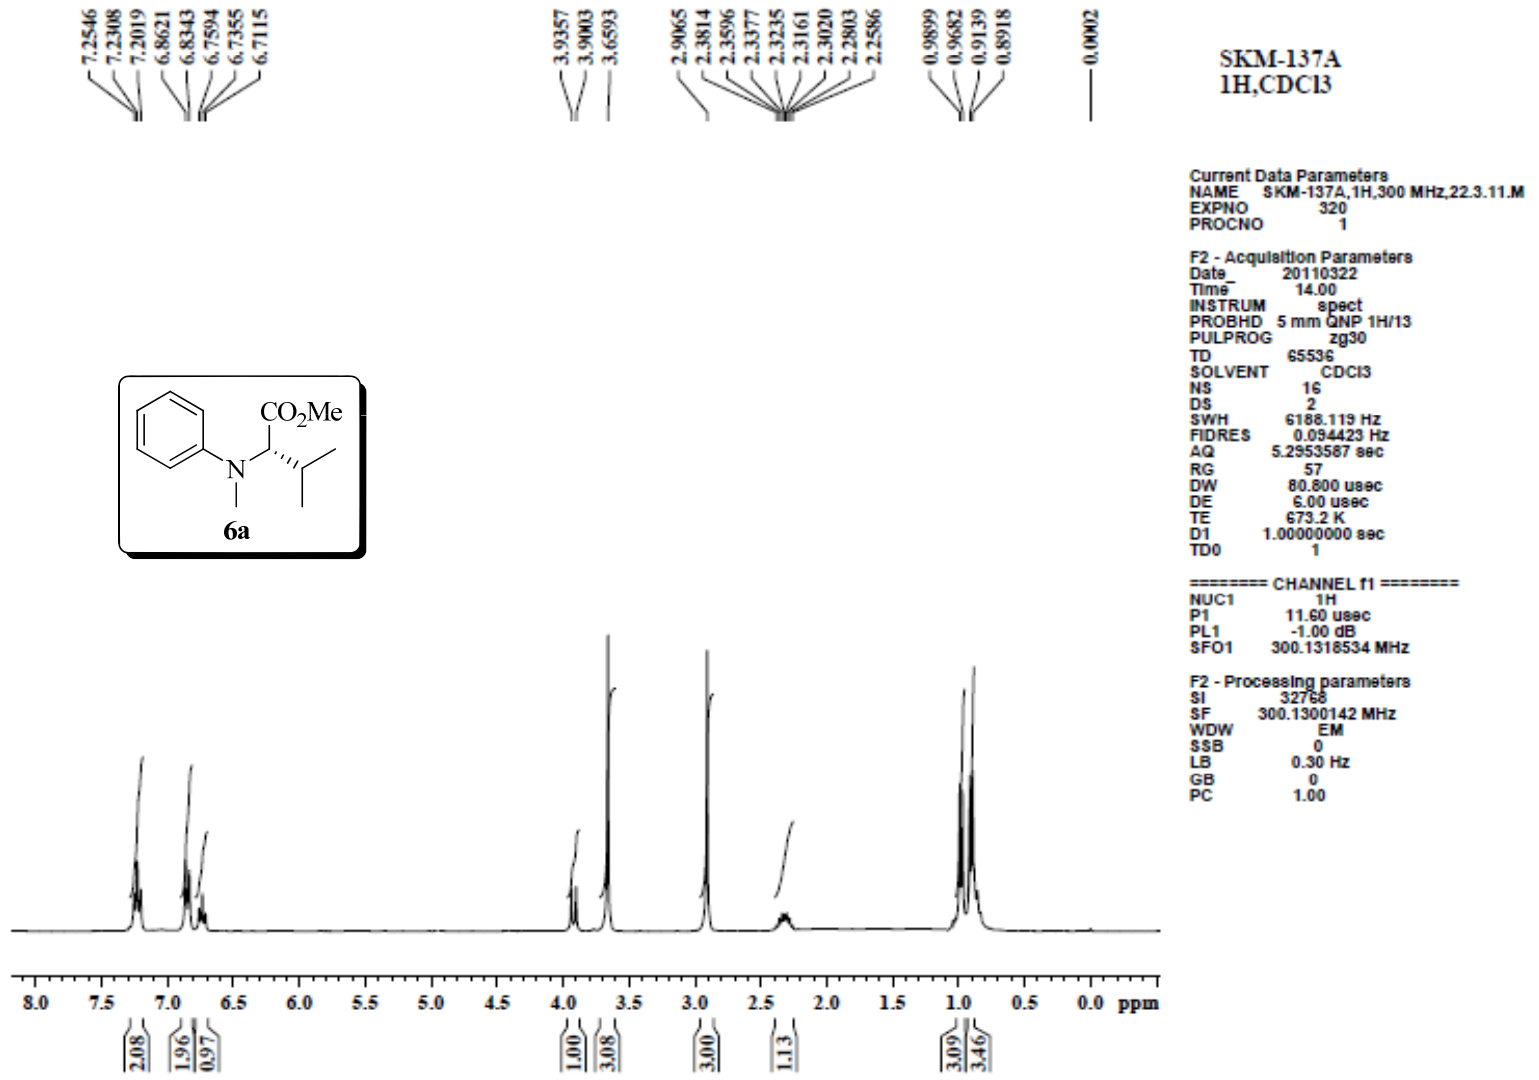

**Figure 1:** <sup>1</sup>H -NMR Spectrum of **6a**.

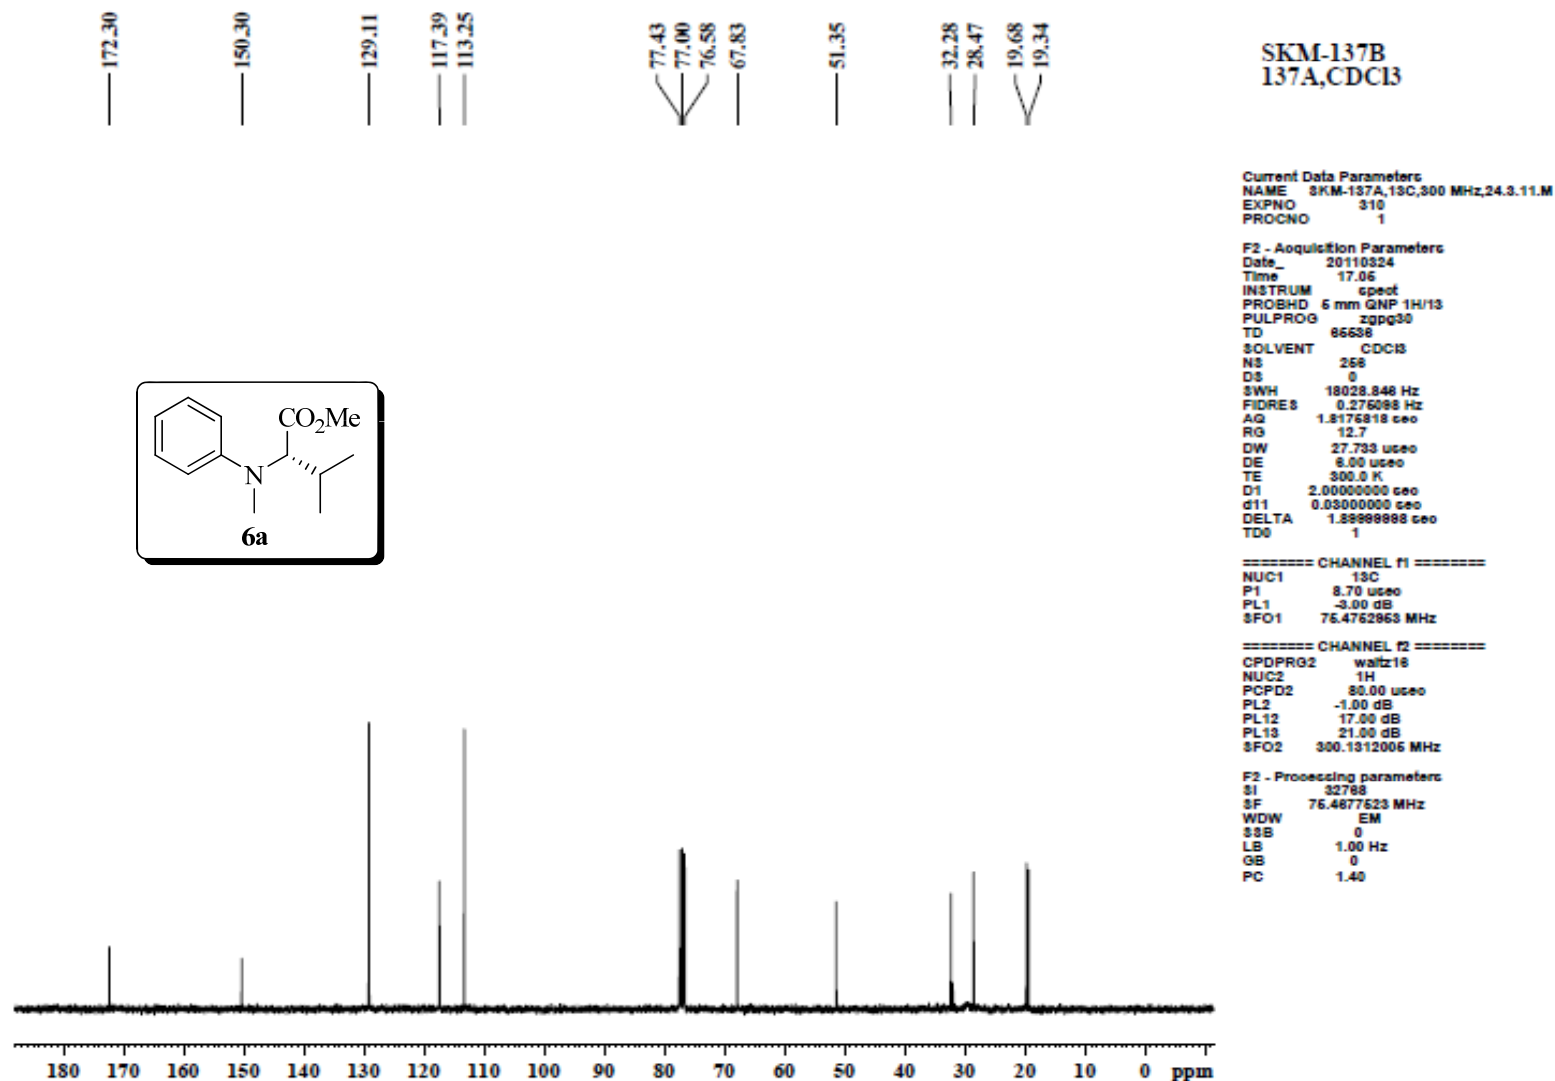

**Figure 2:**  $^{13}\text{C}$  -NMR Spectrum of **6a**.

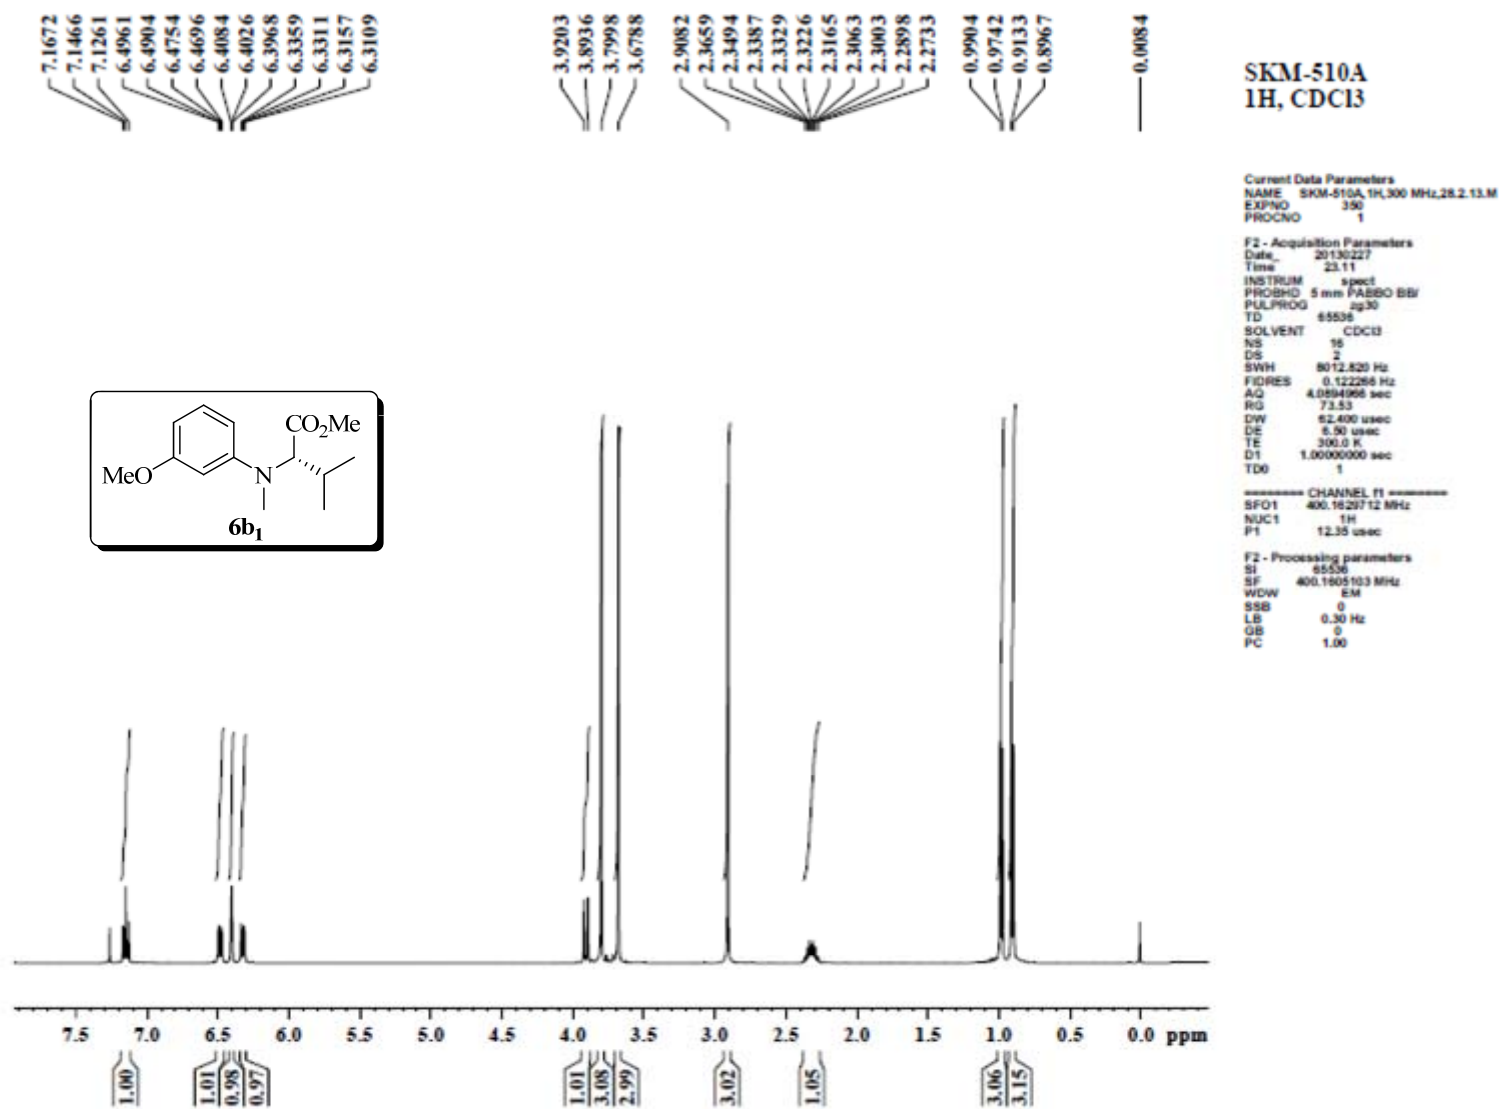

**Figure 3:** <sup>1</sup>H -NMR Spectrum of **6b<sub>1</sub>**.

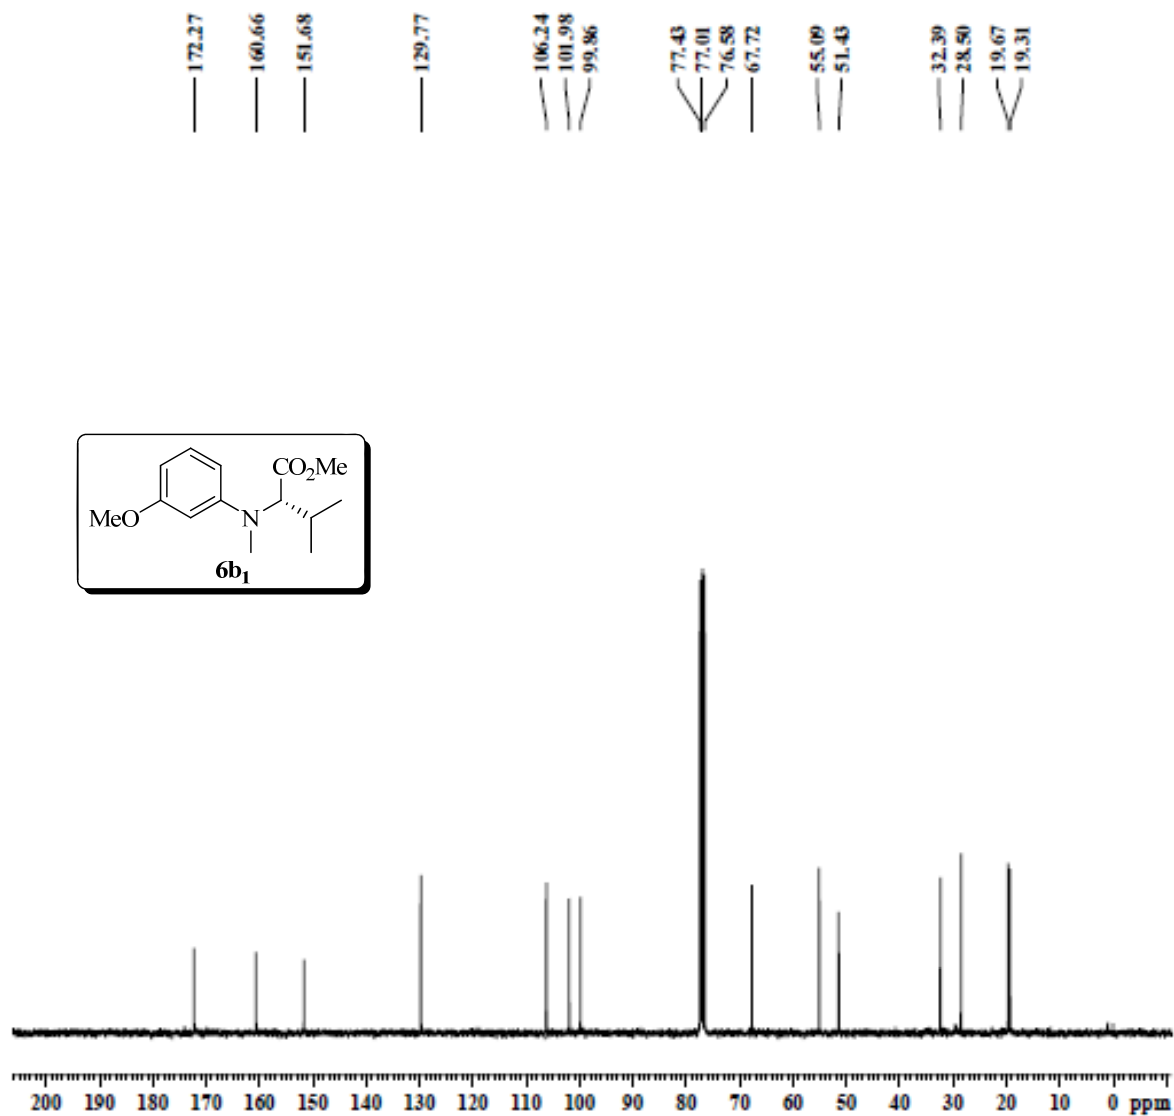

SKM-510A  
13C, CDCl3

Current Data Parameters  
NAME SKM-510A, 13C, 300 MHz, 13.3.13.M  
EXPNO 330  
PROCNO 1

F2 - Acquisition Parameters  
Date\_ 20130313  
Time 1.45  
INSTRUM spect  
PROBHD 5 mm QNP 1H/13  
PULPROG zgpg30  
TD 65536  
SOLVENT CDCl3  
NS 512  
DS 4  
SWH 18025.846 Hz  
FREQS 0.275000 Hz  
AQ 1.8175218 sec  
RG 2950  
DW 27.233 usec  
DE 15.00 usec  
TE 297.2 K  
D1 2.0000000 sec  
D11 0.0300000 sec  
TD0 1

----- CHANNEL F1 -----  
NUC1 13C  
P1 8.15 usec  
PL1 -3.00 dB  
PL1W 65.13059016 W  
SFO1 75.4762953 MHz

----- CHANNEL F2 -----  
CPCPRG2 waltz16  
NUC2 1H  
PCPD2 80.00 usec  
PL2 -1.00 dB  
PL12 17.96 dB  
PL13 21.00 dB  
PL12W 15.02081871 W  
PL12W 0.23479761 W  
PL13W 0.09477486 W  
SFO2 300.1312006 MHz

F2 - Processing parameters  
SI 32768  
SF 75.4677521 MHz  
WDW EM  
SSB 0  
LB 1.00 Hz  
GB 0  
PC 1.40

Figure 4: <sup>13</sup>C -NMR Spectrum of **6b<sub>1</sub>**.



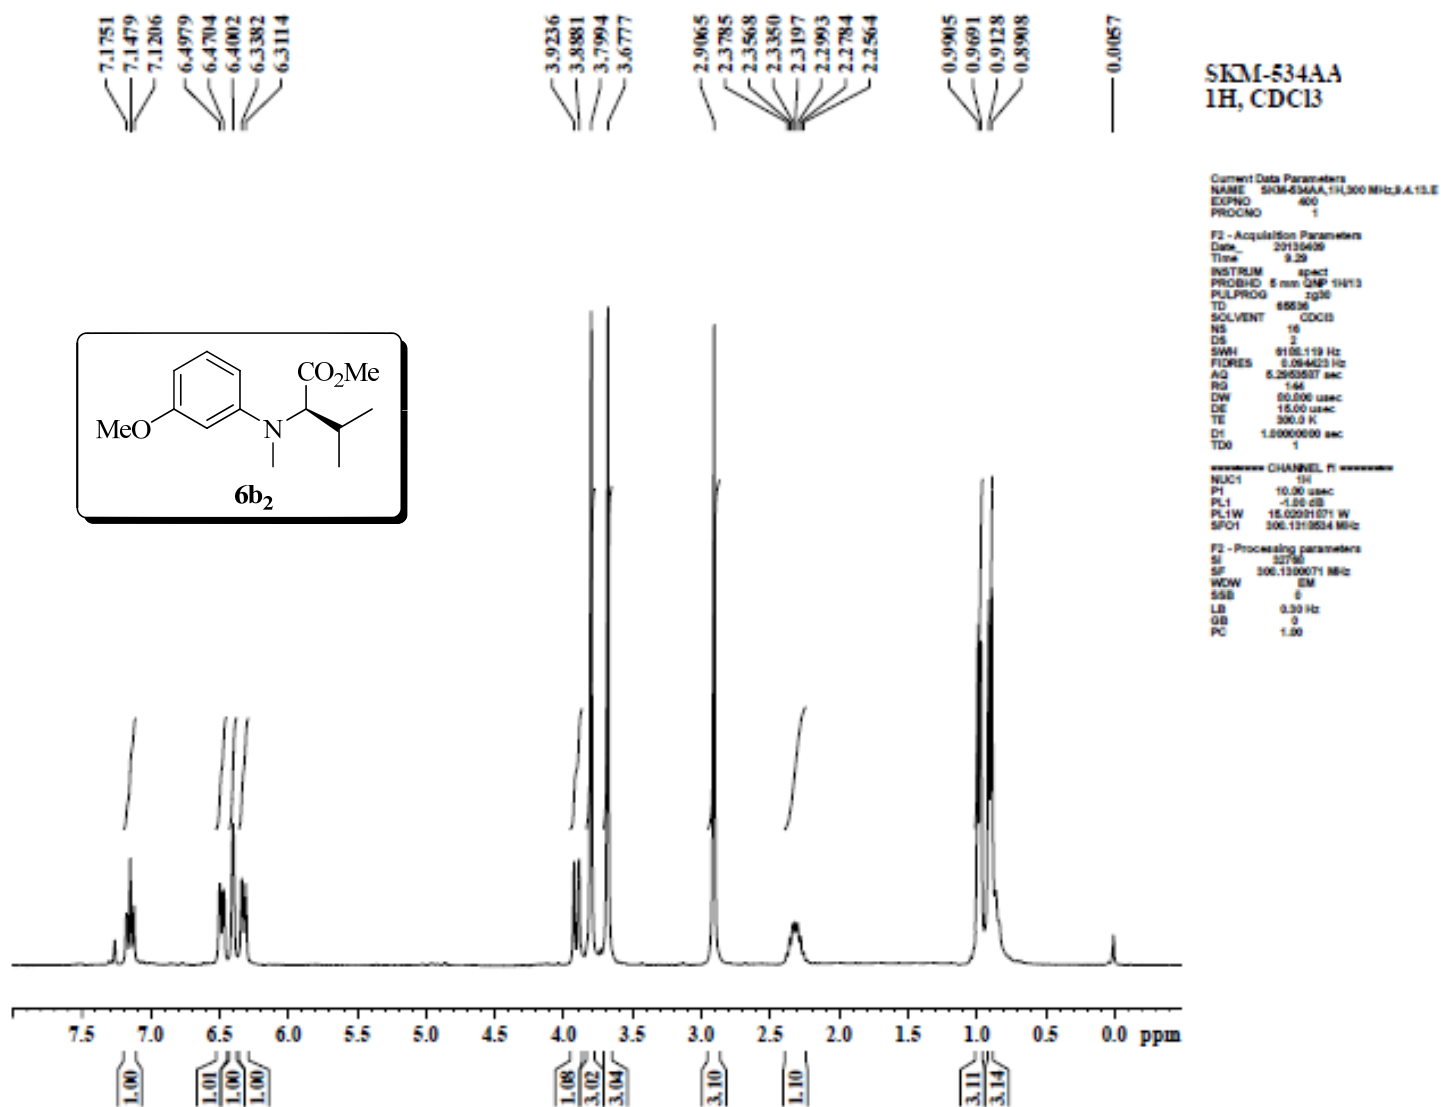

**Figure 5:** <sup>1</sup>H -NMR Spectrum of **6b<sub>2</sub>**.

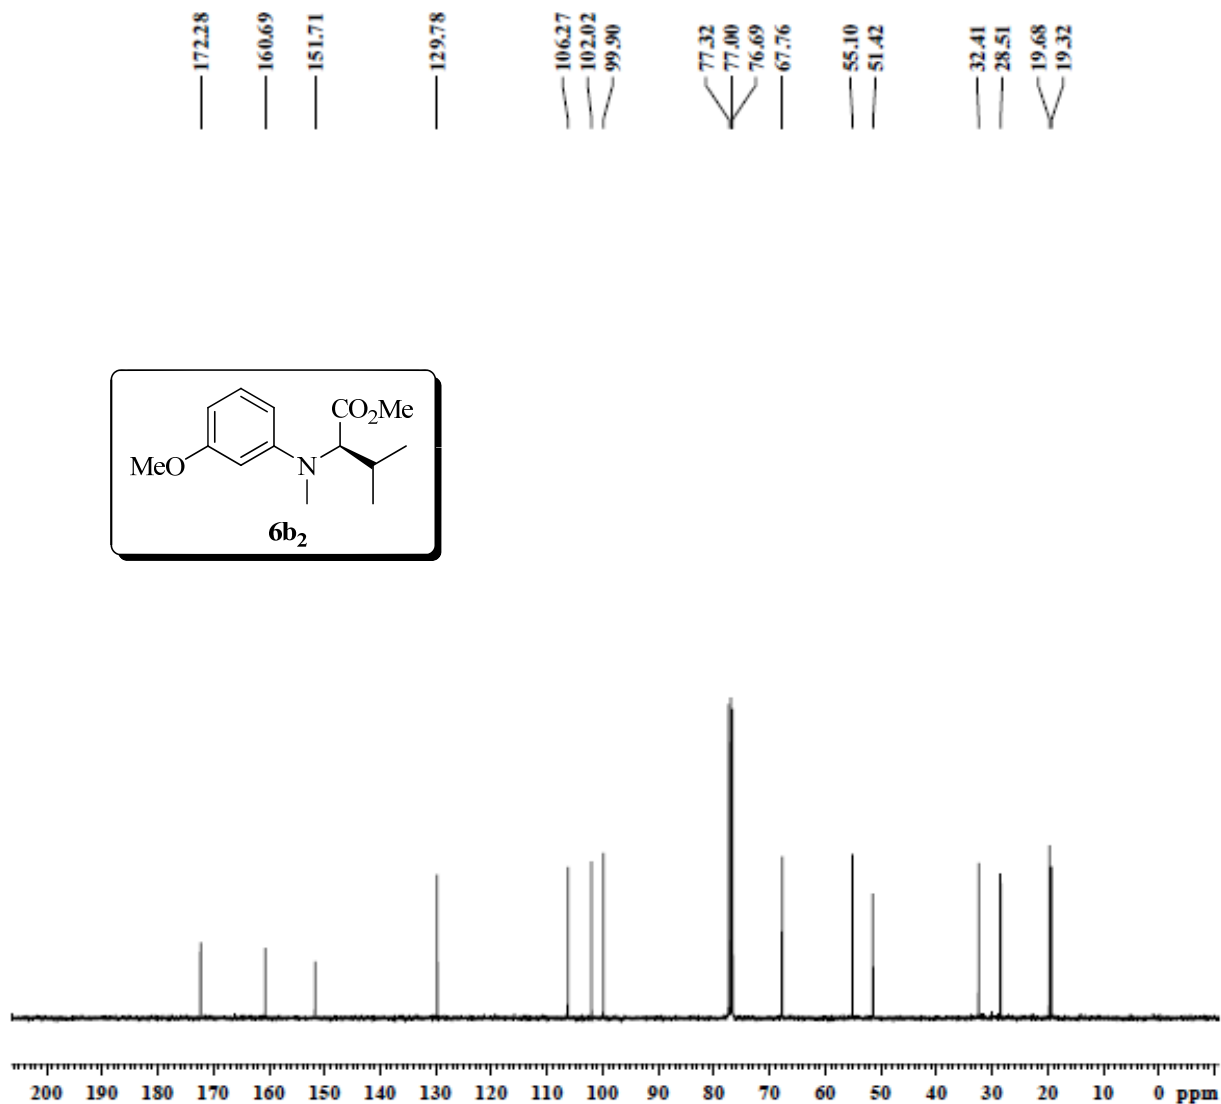

SKM-534 AA  
13C, CDCl3

Current Data Parameters  
NAME SKM-534AA,13C,400 MHz,22.4.13.M  
EXPNO 366  
PROCNO 1

F2 - Acquisition Parameters  
Date\_ 20130422  
Time 19.01  
INSTRUM spect  
PROBHD 5 mm PABBO BBI  
PULPROG zgpg30  
TD 65536  
SOLVENT CDCl3  
NS 512  
DS 4  
SWH 24038.461 Hz  
FIDRES 0.366798 Hz  
AQ 1.3631988 sec  
RG 201.48  
DNV 20.000 usec  
DE 6.50 usec  
TE 300.0 K  
DT 2.0000000 sec  
D11 0.03000000 sec  
TD0 1

===== CHANNEL f1 =====  
SFO1 100.6204411 MHz  
NUC1 13C  
P1 8.20 usec

F2 - Processing parameters  
SI 32768  
SF 100.6204411 MHz  
WZW EM  
SSB 0  
LB 1.00 Hz  
GB 0  
PC 1.40

Figure 6: <sup>13</sup>C -NMR Spectrum of **6b<sub>2</sub>**.

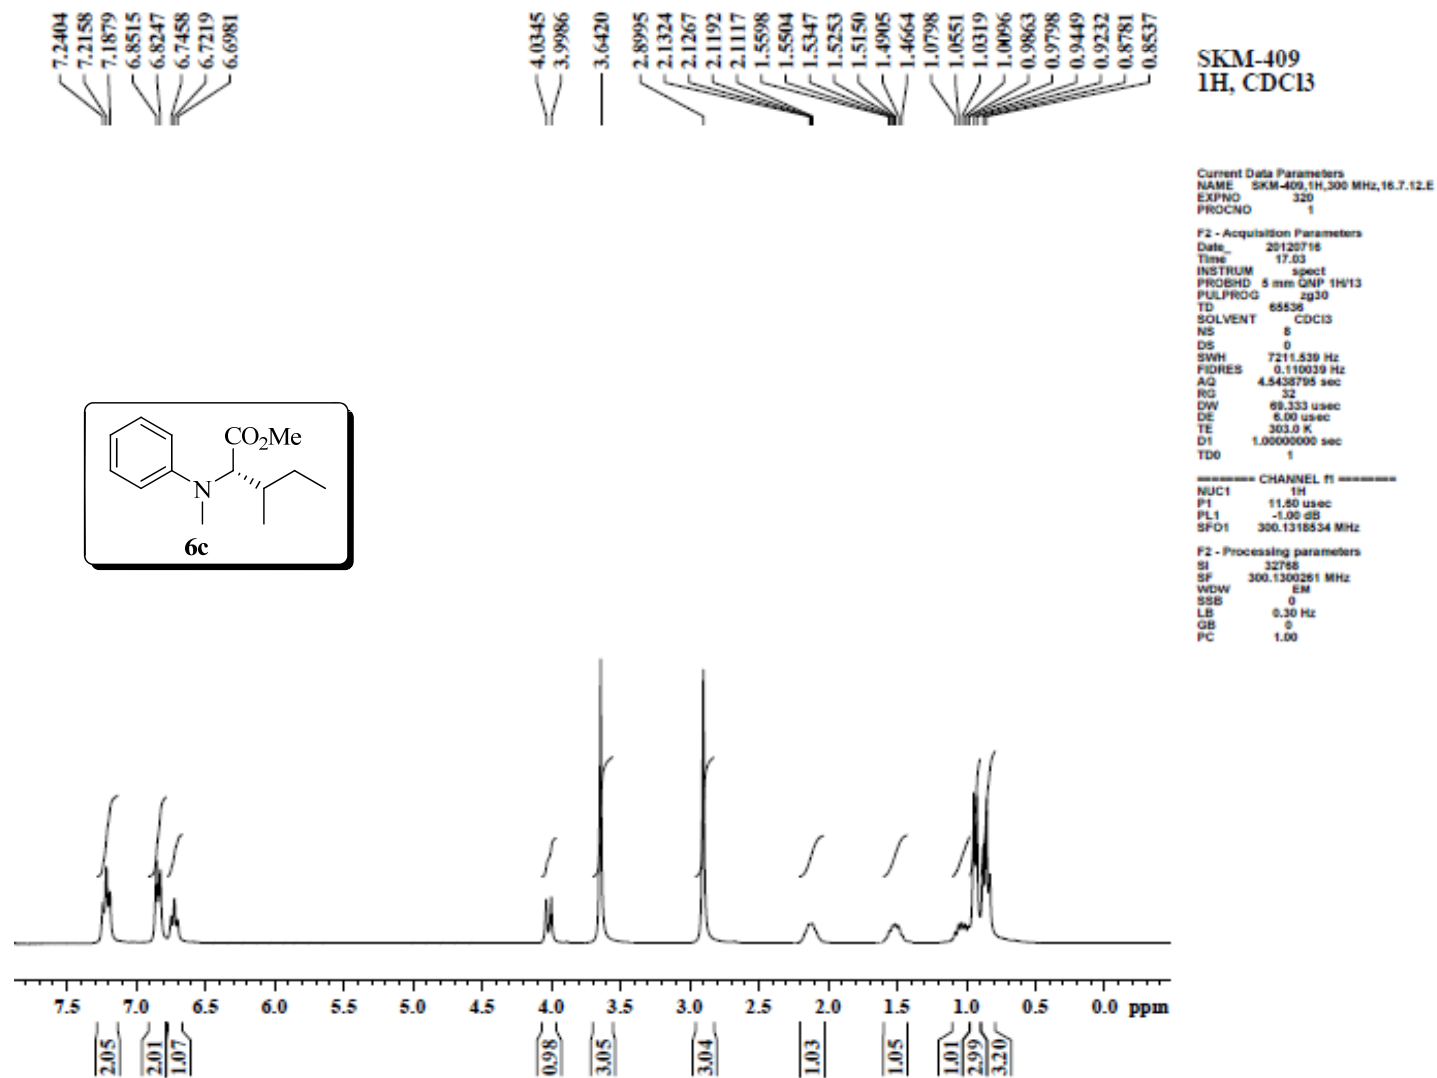

**Figure 7:**  $^1\text{H}$ -NMR Spectrum of **6c**.

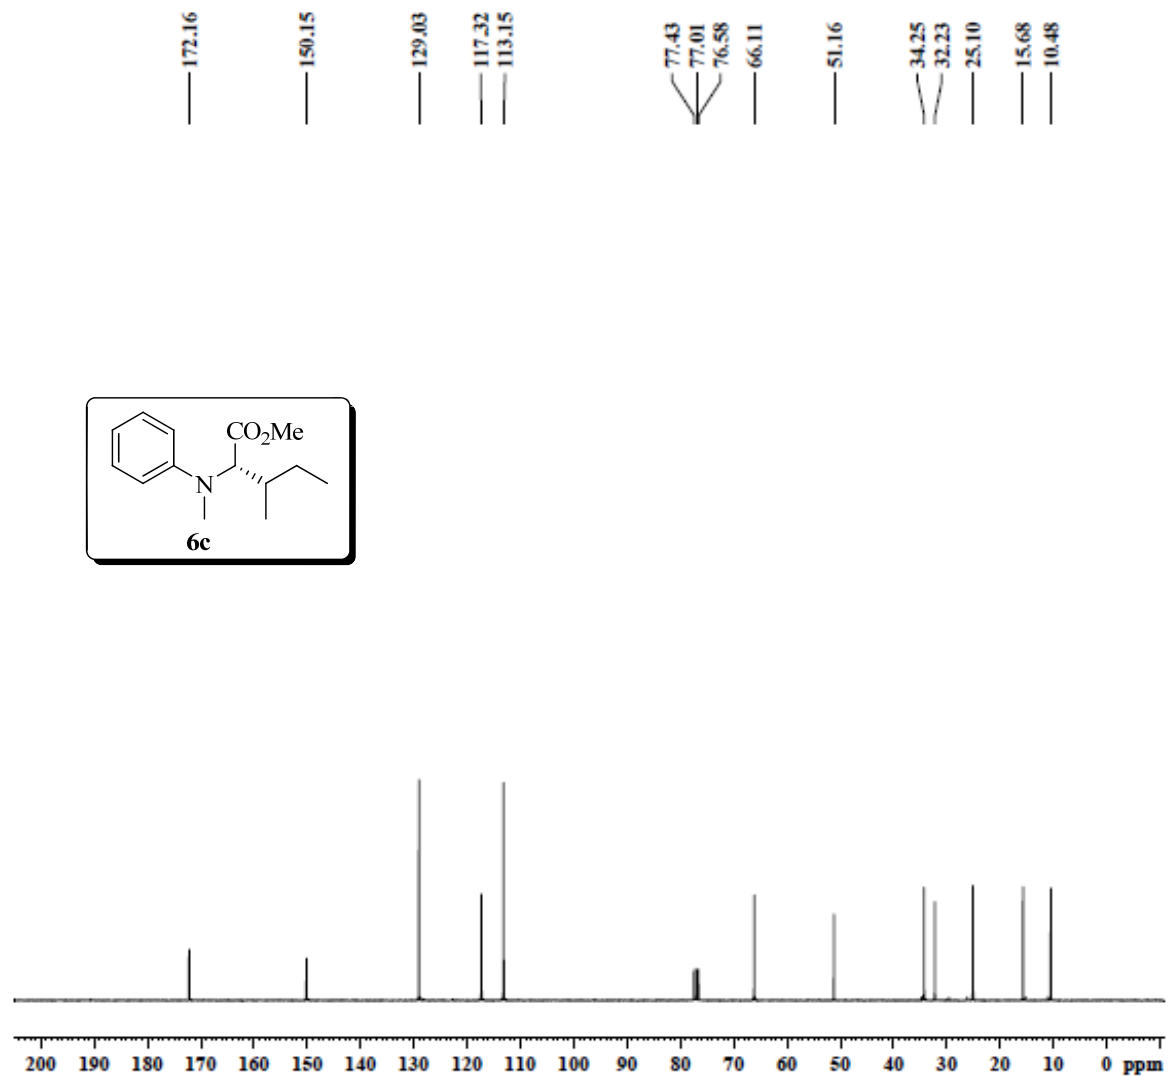

SKM-409  
13C, CDCl3

Current Data Parameters  
NAME SKM-409,13C,300 MHz,27.7,12.M  
EXPNO 430  
PROCNO 1

F2 - Acquisition Parameters  
Date\_ 20120728  
Time 2.10  
INSTRUM spect  
PROBHD 5 mm GNP 1H/13  
PULPROG zgpg30  
TD 65536  
SOLVENT CDCl3  
NS 512  
DS 4  
SWH 18028.846 Hz  
FIDRES 0.275099 Hz  
AQ 1.8175819 sec  
RG 14.2  
DW 27.733 usec  
DE 6.00 usec  
TE 303.0 K  
D1 2.00000000 sec  
d11 0.03000000 sec  
DELTA 1.80999998 sec  
TD0 1

===== CHANNEL f1 =====  
NUC1 13C  
P1 8.70 usec  
PL1 -3.00 dB  
SFO1 75.4752953 MHz

===== CHANNEL f2 =====  
CPDPRG2 waltz16  
NUC2 1H  
PCPD2 80.00 usec  
PL2 -1.00 dB  
PL12 17.00 dB  
PL13 21.00 dB  
SFO2 300.1312005 MHz

F2 - Processing parameters  
SI 32768  
SF 75.4677625 MHz  
WDW EM  
SSB 0  
LB 1.00 Hz  
GB 0  
PC 1.40

Figure 8: <sup>13</sup>C -NMR Spectrum of **6c**.

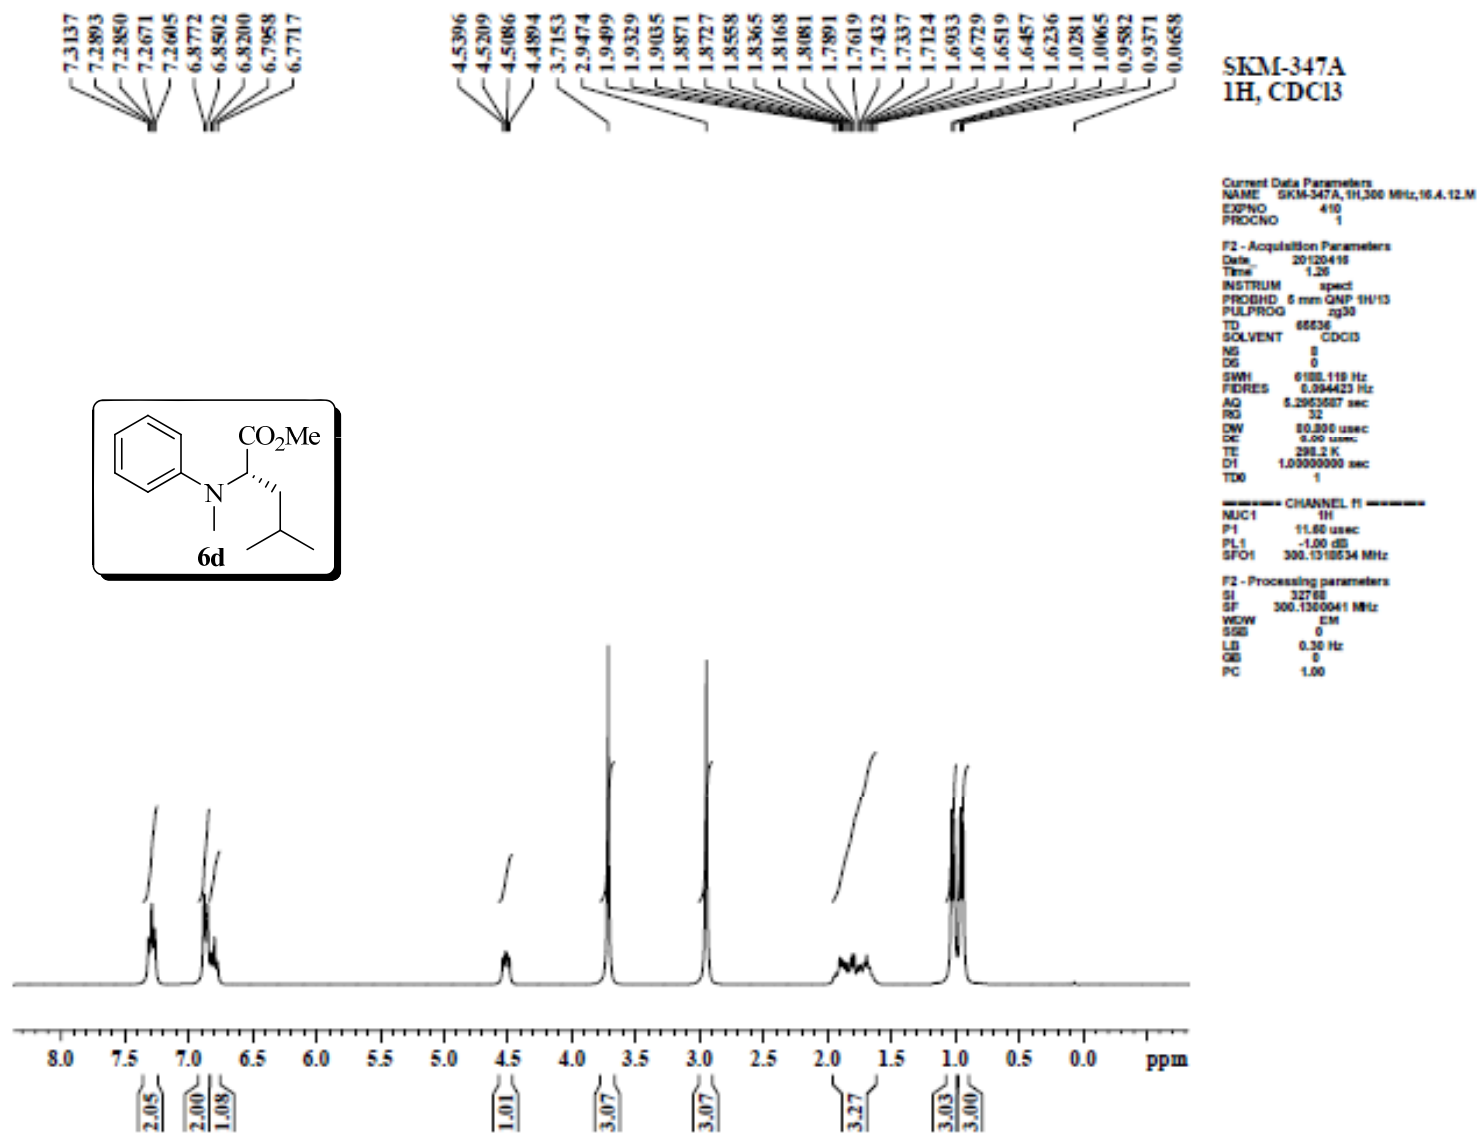

**Figure 9:** <sup>1</sup>H -NMR Spectrum of **6d**.

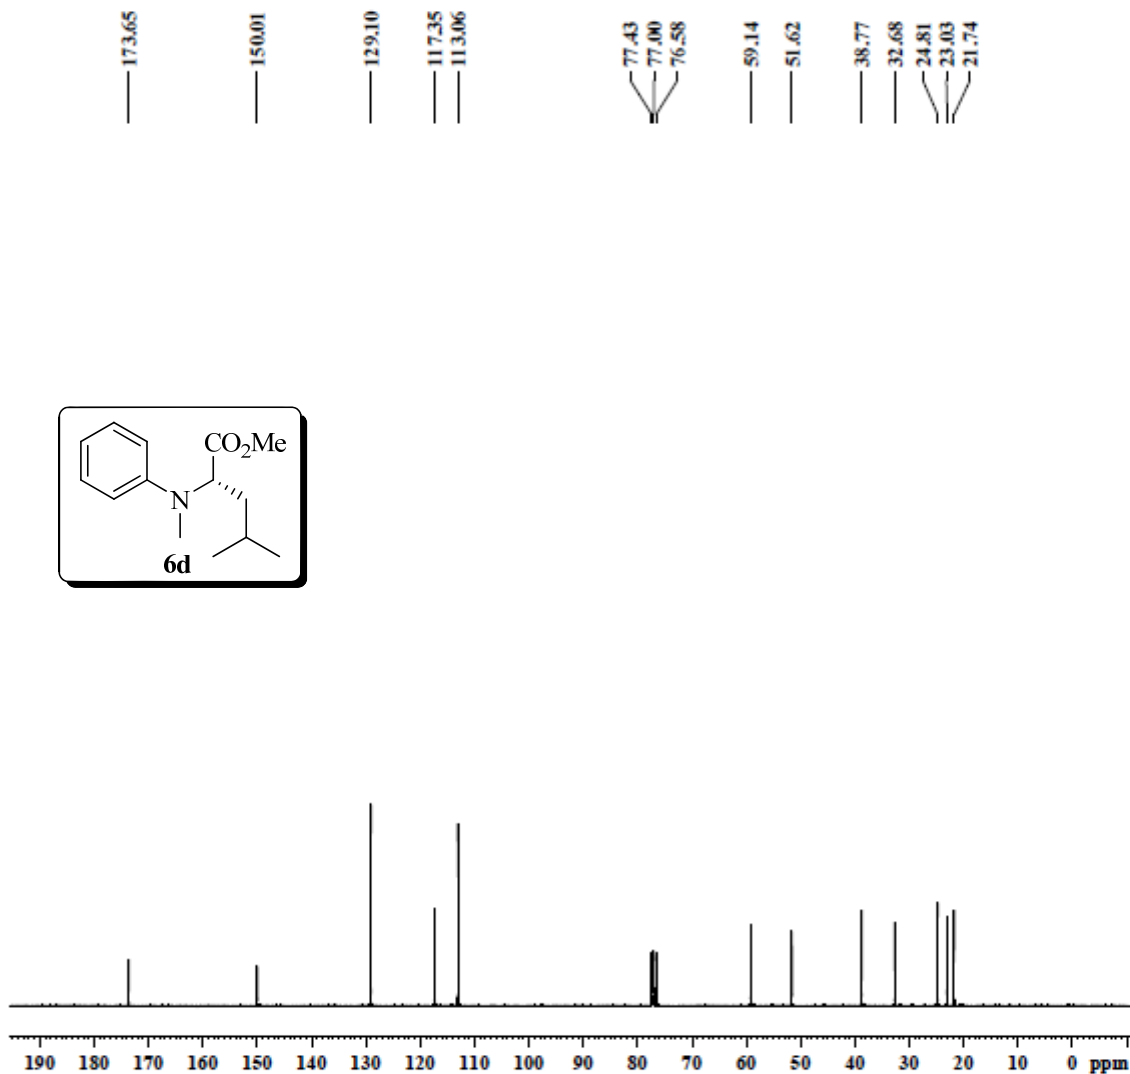

SKM-347B  
13C, CDC13

Current Data Parameters  
NAME SKM-347A, 13C, 200 MHz, 27.9, 12. M  
EXPNO 320  
PROCNO 1

F2 - Acquisition Parameters  
Date\_ 20120830  
Time 18.51  
INSTRUM spect  
PROBHD 5 mm QNP 1H/13  
PULPROG zgpg30  
TD 68836  
SOLVENT CDC13  
NS 512  
DS 4  
SWH 18028.846 Hz  
FIDRES 0.275098 Hz  
AQ 1.8175818 sec  
RG 2050  
DW 27.733 usec  
DE 15.00 usec  
TE 673.2 K  
D1 2.0000000 sec  
D11 0.0300000 sec  
TDO 1

===== CHANNEL f1 =====  
NUC1 13C  
P1 8.15 usec  
PL1 -3.00 dB  
PL1W 55.13059616 W  
SFO1 75.4752953 MHz

===== CHANNEL f2 =====  
CPDPRG2 waltz16  
NUC2 1H  
PCPD2 80.00 usec  
PL2 -1.00 dB  
PL12 17.06 dB  
PL13 21.00 dB  
PL2W 15.52081871 W  
PL12W 6.23478181 W  
PL13W 6.09477496 W  
SFO2 300.1312005 MHz

F2 - Processing parameters  
SI 32768  
SF 75.4677597 MHz  
WDW EM  
SSB 0  
LB 1.00 Hz  
GB 0  
PC 1.40

Figure 10: <sup>13</sup>C -NMR Spectrum of **6d**.

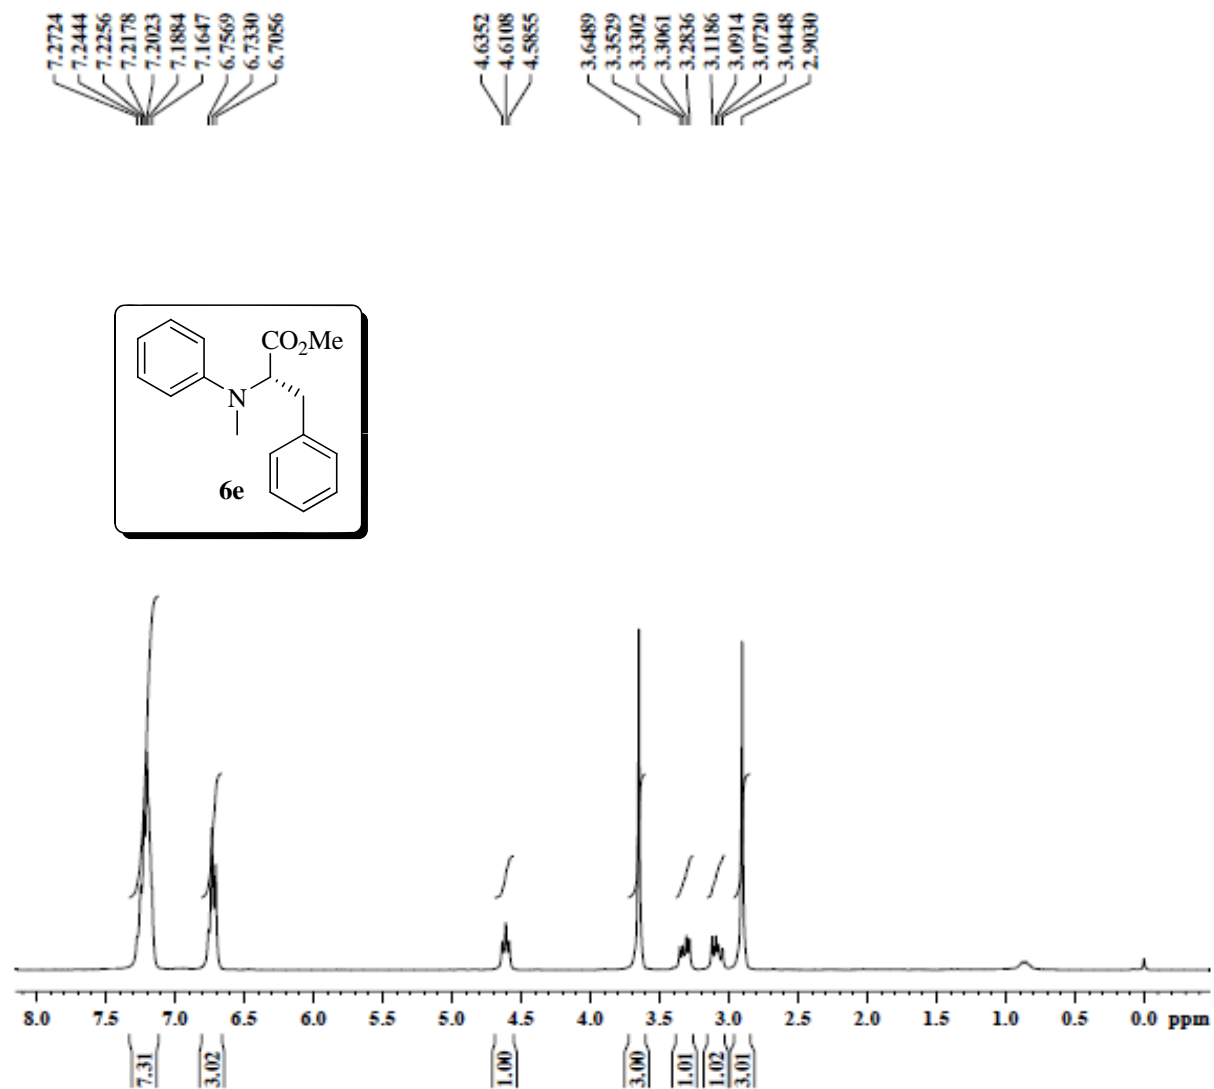

SKM-328  
1H, CDCl<sub>3</sub>

Current Data Parameters  
NAME SKM-328.1H.300 MHz.19.3.12.M  
EXPNO 390  
PROCNO 1

F2 - Acquisition Parameters  
Date\_ 20120319  
Time 12.47  
INSTRUM spect  
PROBHD 5 mm QNP 1H/13  
PULPROG zg30  
TD 65536  
SOLVENT CDCl<sub>3</sub>  
NS 8  
DS 0  
SWH 6188.119 Hz  
FIDRES 0.094423 Hz  
AQ 5.2953587 sec  
RG 80.6  
DW 80.000 usec  
DE 5.00 usec  
TE 298.6 K  
D1 1.00000000 sec  
TD0 1

===== CHANNEL f1 =====  
NUC1 1H  
P1 11.80 usec  
PL1 -1.00 dB  
SFO1 300.1318534 MHz

F2 - Processing parameters  
SI 32768  
SF 300.1300168 MHz  
WDW EM  
SSB 0  
LB 0.30 Hz  
GB 0  
PC 1.00

Figure 11: <sup>1</sup>H -NMR Spectrum of **6e**.

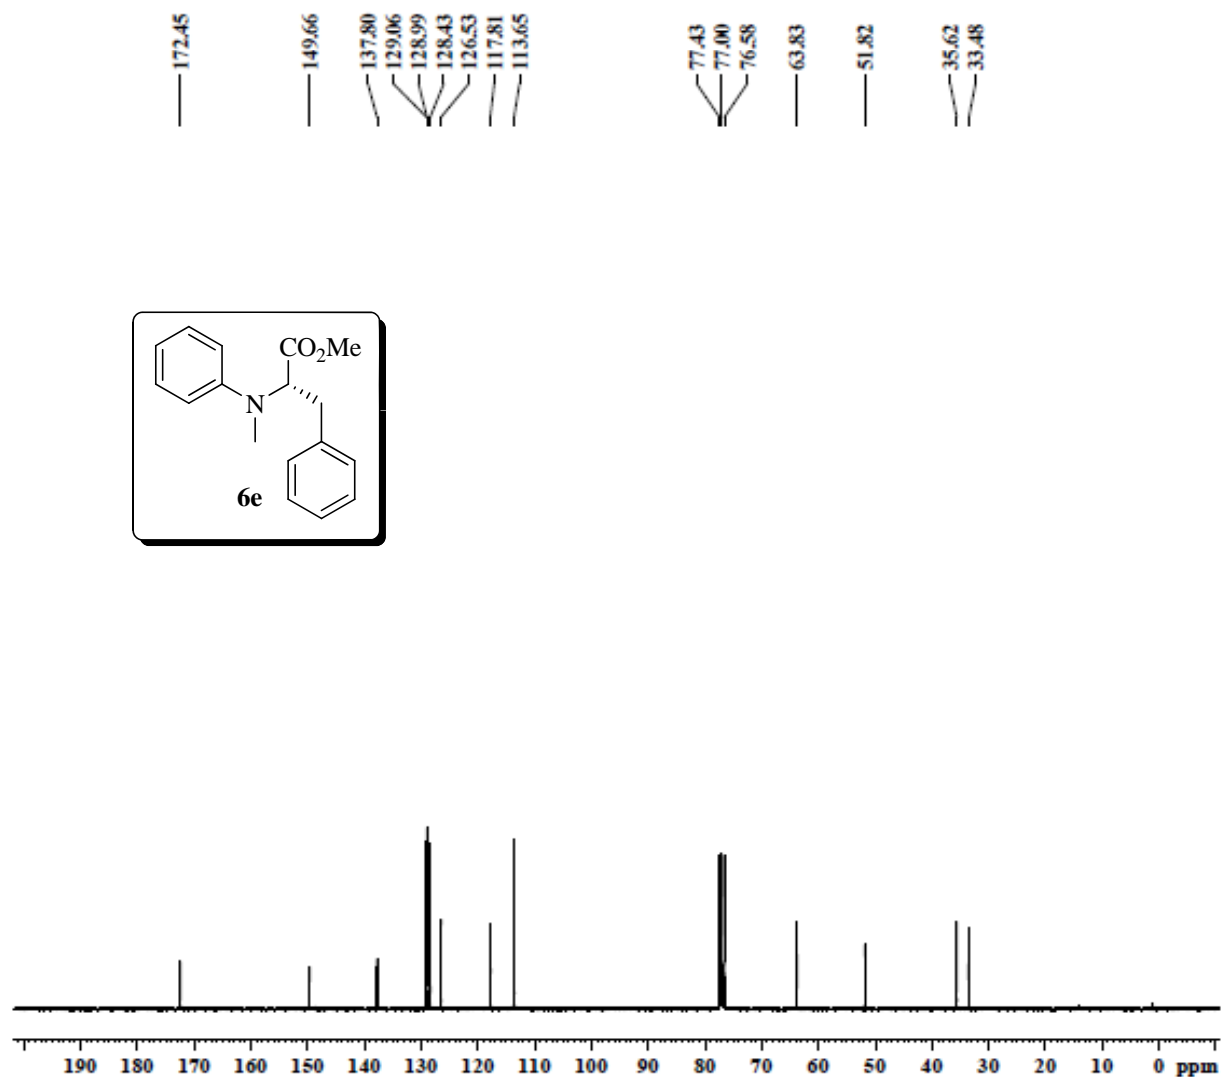

SKM-328  
13C, CDCl3

Current Data Parameters  
NAME SKM-328,13C,200 MHz,27.09.12.M  
EXPNO 310  
PROCNO 1

F2 - Acquisition Parameters  
Date\_ 20120930  
Time 18.12  
INSTRUM spect  
PROBHD 5 mm QNP 1H/13  
PULPROG zgpg30  
TD 65536  
SOLVENT CDCl3  
NS 512  
DS 4  
SWH 19026.846 Hz  
FIDRES 0.275098 Hz  
AQ 1.8175818 sec  
RG 2050  
DW 27.733 usec  
DE 15.00 usec  
TE 273.2 K  
D1 2.00000000 sec  
D11 0.03000000 sec  
TD0 1

===== CHANNEL f1 =====  
NUC1 13C  
P1 8.15 usec  
PL1 -3.00 dB  
PL1W 55.13059616 W  
SFO1 75.4752853 MHz

===== CHANNEL f2 =====  
CPCPRG2 waltz16  
NUC2 1H  
PCPD2 80.00 usec  
PL2 -1.00 dB  
PL12 17.06 dB  
PL13 21.00 dB  
PL2W 15.02081871 W  
PL12W 0.23479761 W  
PL13W 0.09477496 W  
SFO2 300.1312005 MHz

F2 - Processing parameters  
SI 32768  
SF 75.4677556 MHz  
WDW EM  
SSB 0  
LB 1.00 Hz  
GB 0  
PC 1.40

Figure 12:  $^{13}\text{C}$  -NMR Spectrum of **6e**.



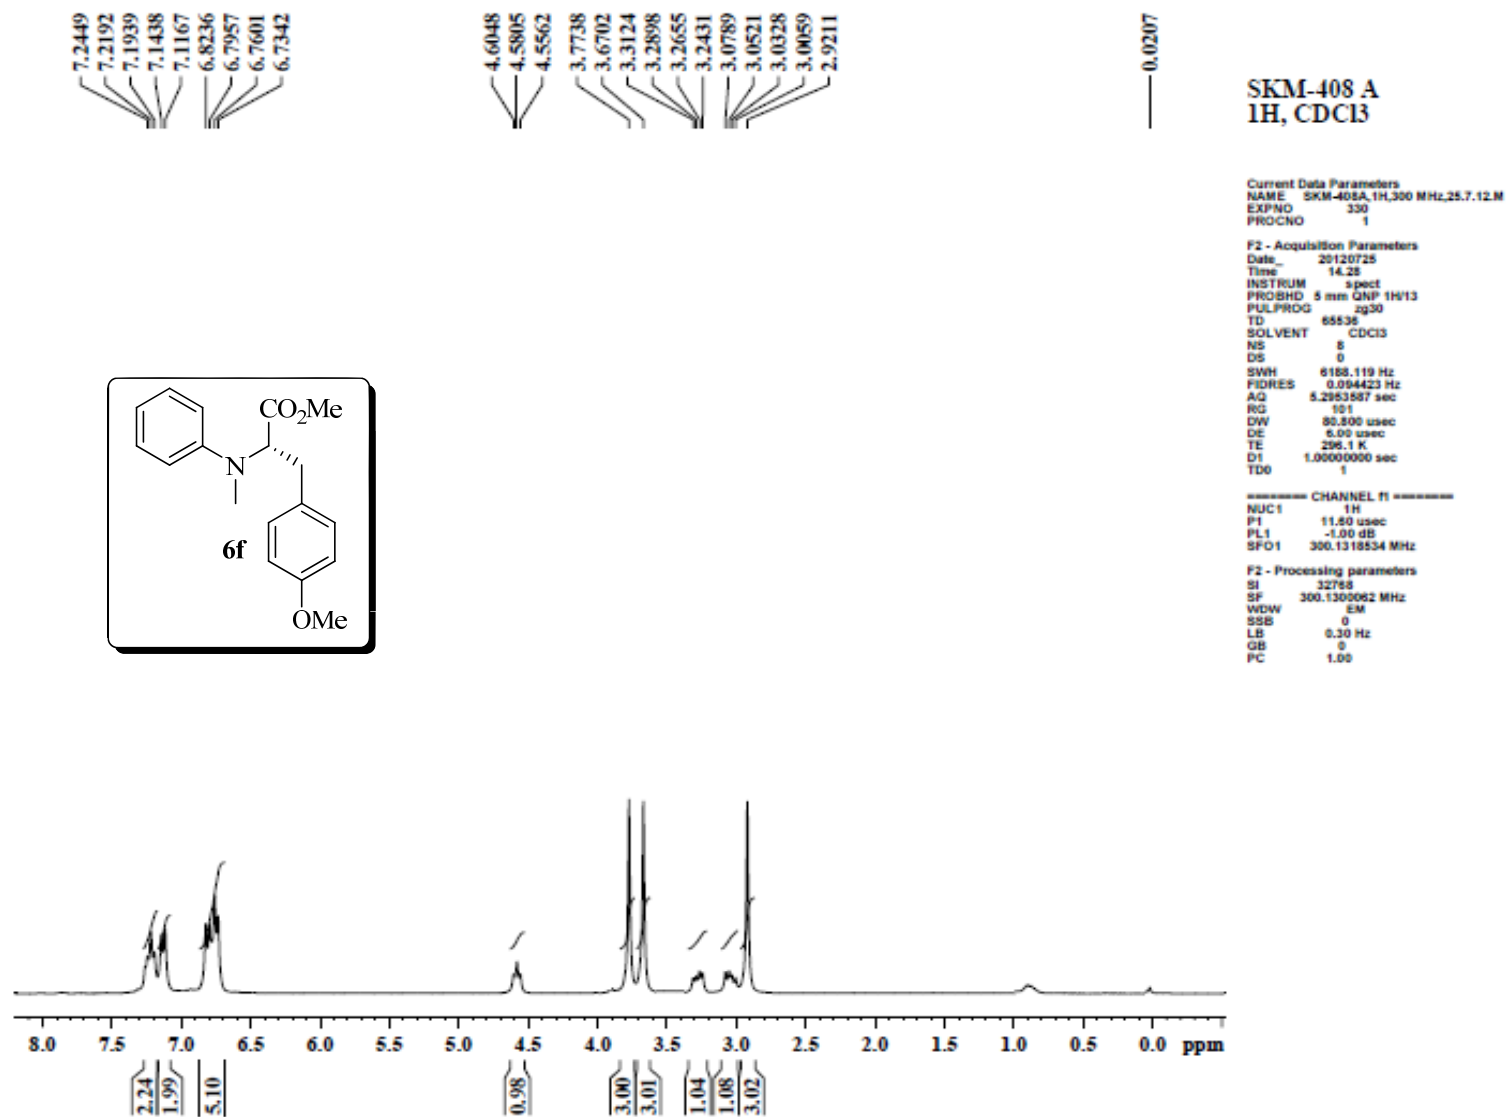

Figure 13:  $^1\text{H}$ -NMR Spectrum of **6f**.

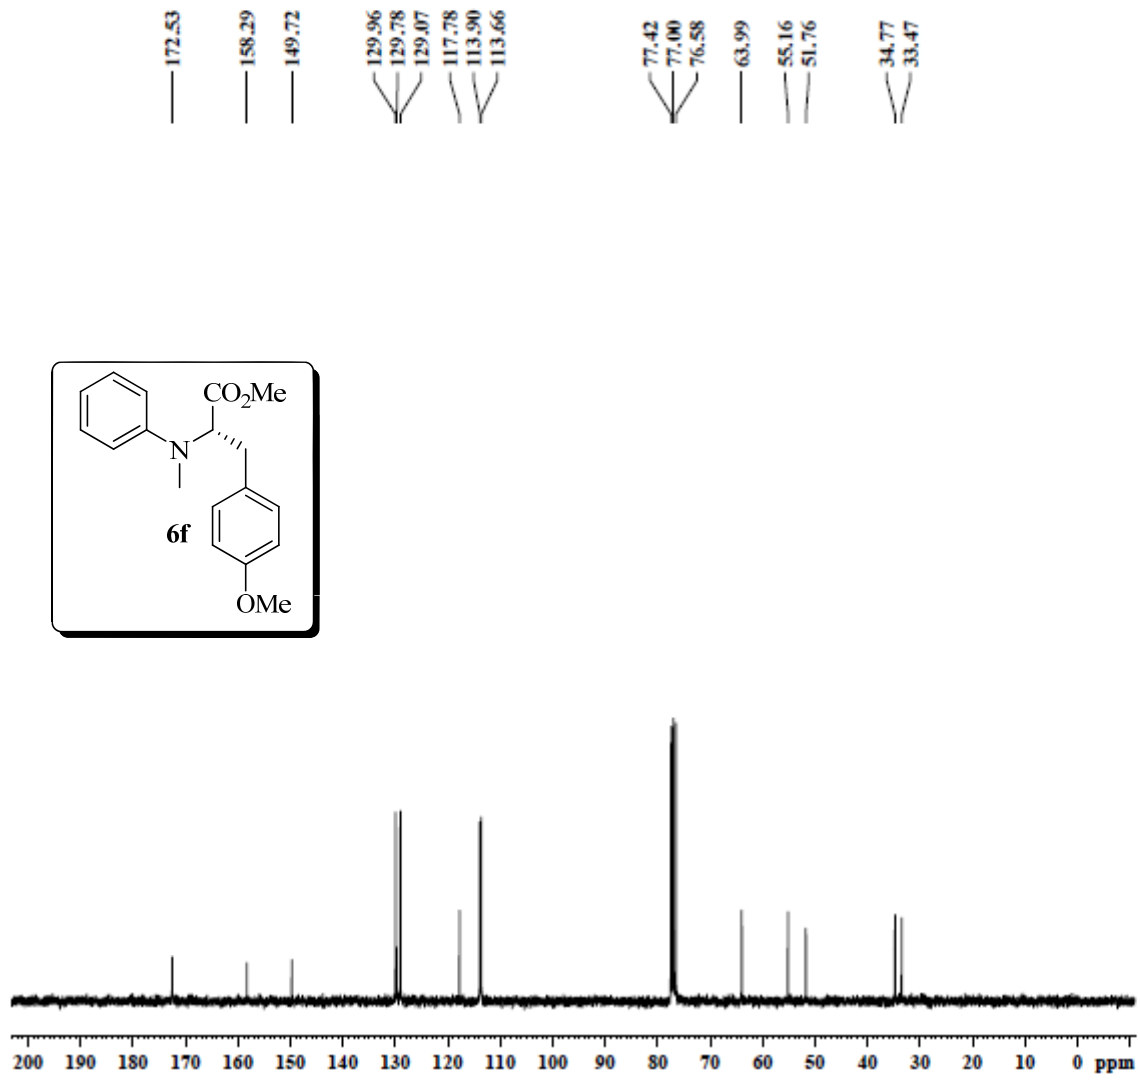

SKM-408A  
13C,CDCl3

```

Current Data Parameters
NAME SKM-408A,13C,300 MHz,27.7.12.M
EXPNO 420
PROCNO 1

F2 - Acquisition Parameters
Date_ 20120728
Time 1.31
INSTRUM spect
PROBHD 5 mm QNP 1H/13
PULPROG zgpg30
TD 65536
SOLVENT CDCl3
NS 512
DS 4
SWH 18028.848 Hz
FIDRES 0.275096 Hz
AQ 1.8175818 sec
RG 127
DW 27.733 usec
DE 6.00 usec
TE 303.0 K
D1 2.00000000 sec
d11 0.03000000 sec
DELTA 1.89999996 sec
TDO 1

===== CHANNEL f1 =====
NUC1 13C
P1 8.70 usec
PL1 -3.00 dB
SFO1 75.4752963 MHz

===== CHANNEL f2 =====
CPDPRG2 waltz16
NUC2 1H
PCPD2 80.00 usec
PL2 -1.00 dB
PL12 17.00 dB
PL13 21.00 dB
SFO2 300.1312005 MHz

F2 - Processing parameters
SI 32768
SF 75.4677520 MHz
WDW EM
SSB 0
LB 1.00 Hz
GB 0
PC 1.40

```

Figure 14: <sup>13</sup>C -NMR Spectrum of **6f**.

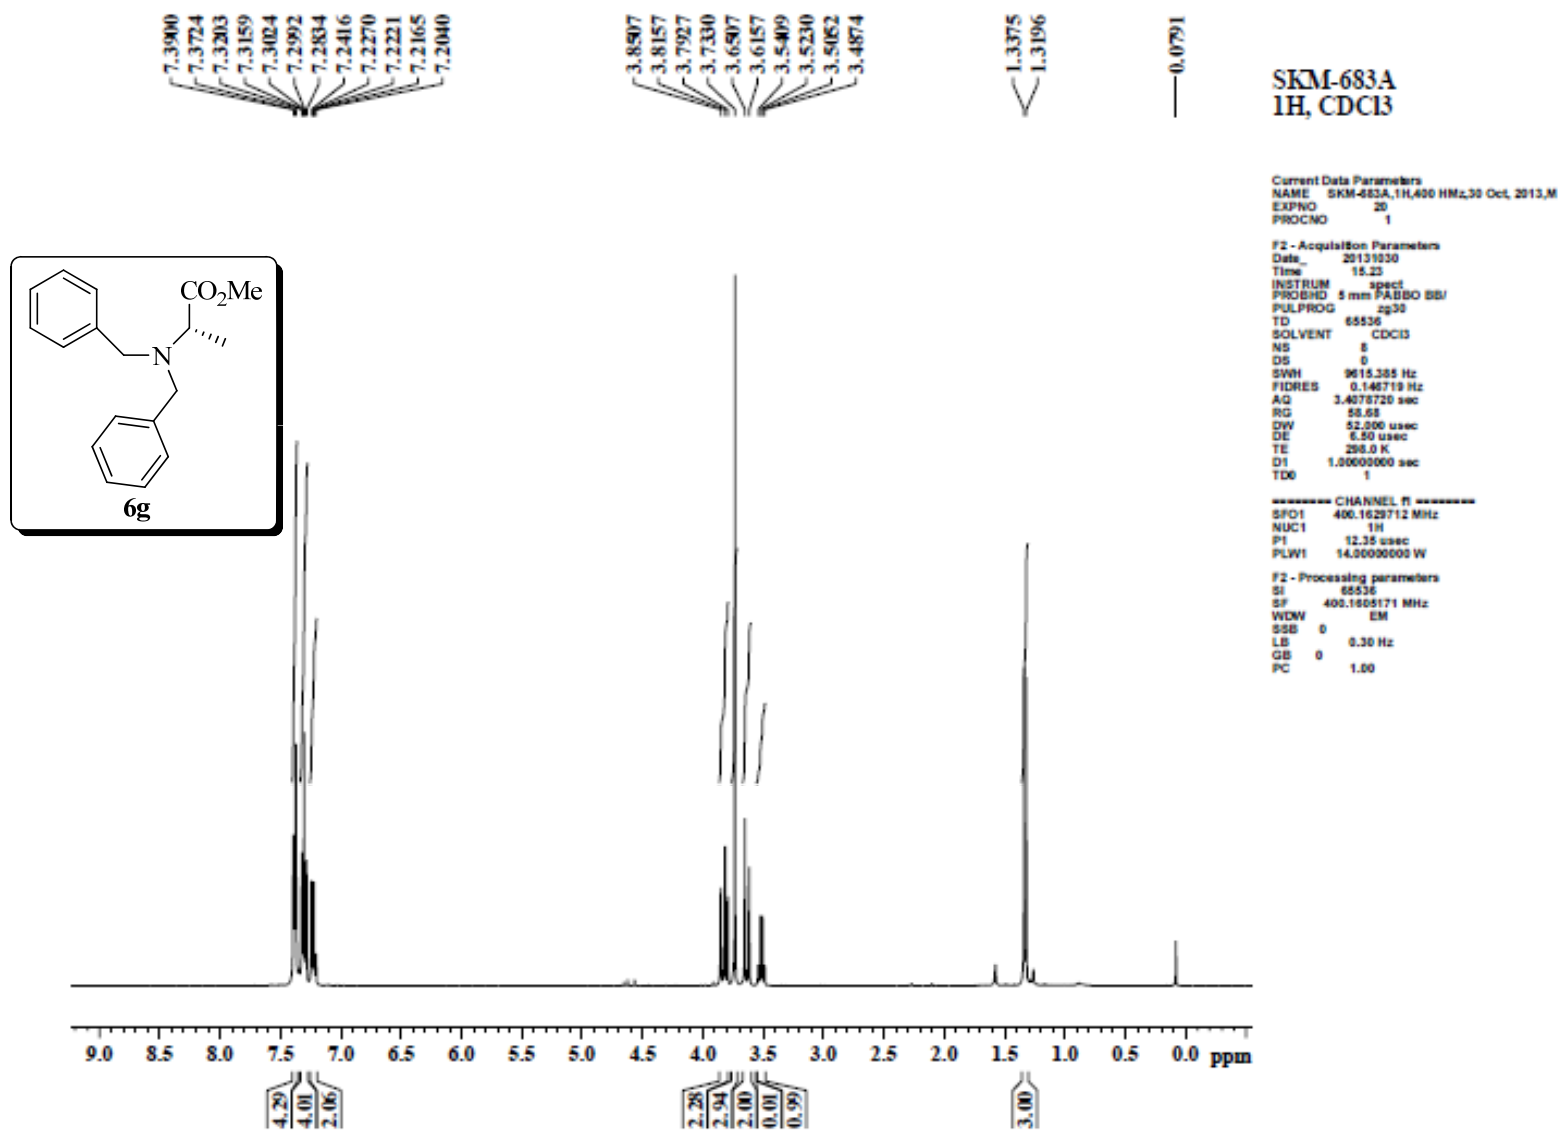

Figure 15: <sup>1</sup>H -NMR Spectrum of **6g**.

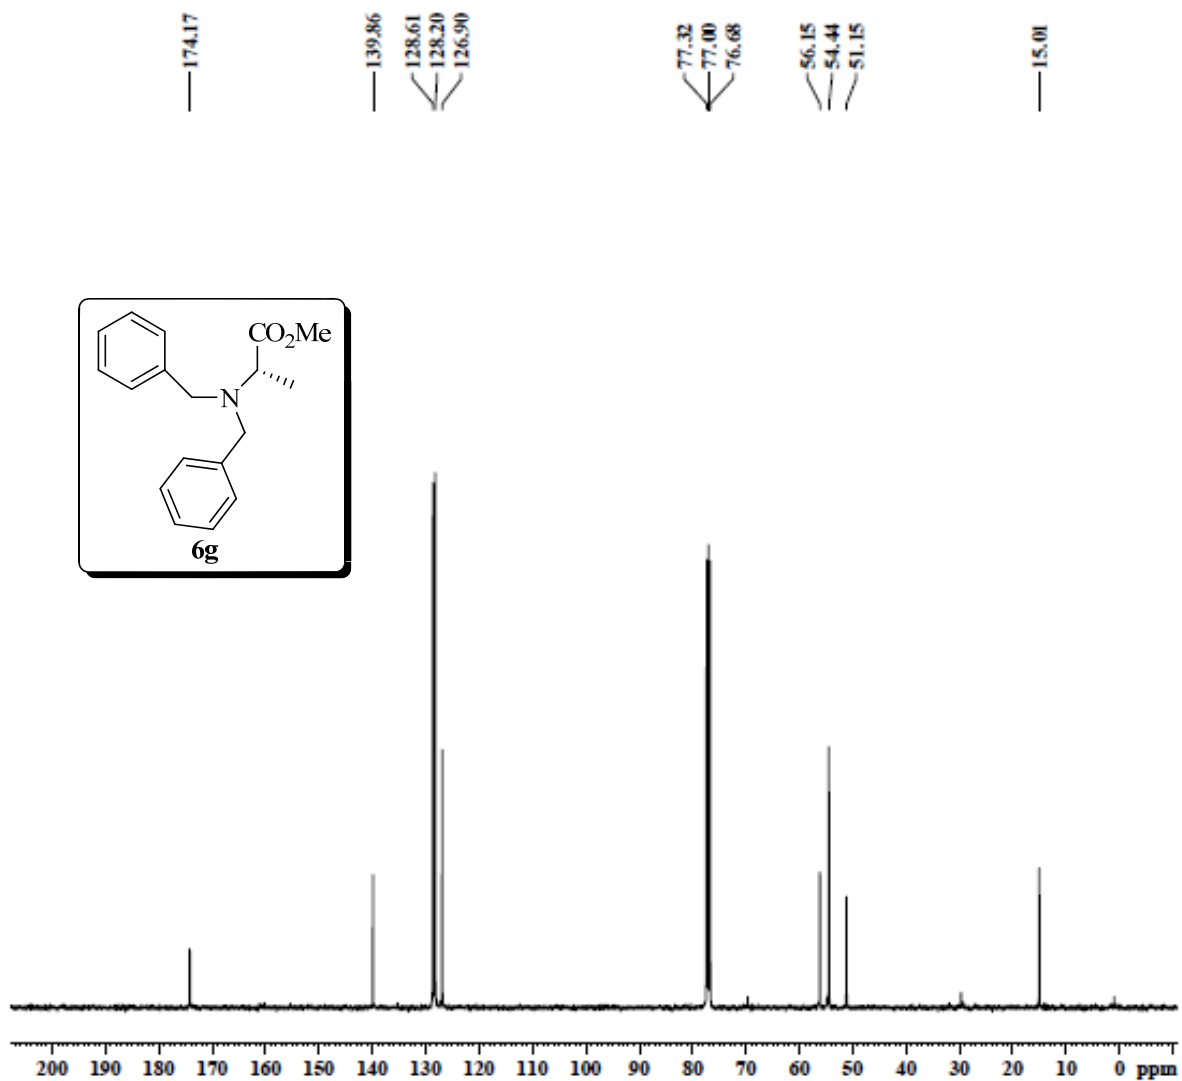

SKM-683A  
1H, CDCl3

Current Data Parameters  
NAME SKM-683A, 13C, 400 MHz, 2 Dec, 2013, M  
EXPNO 30  
PROCNO 1

F2 - Acquisition Parameters

Date\_ 20131203  
Time 9.37  
INSTRUM spect  
PROBHD 5 mm PABBO BB/  
PULPROG zgpg30  
TD 65536  
SOLVENT CDCl3  
NS 512  
DS 4  
SWH 24938.461 Hz  
FIDRES 0.366736 Hz  
AQ 1.3631488 sec  
RG 201.48  
DW 20.800 usec  
DE 6.50 usec  
TE 300.2 K  
D1 2.0000000 sec  
D11 0.0300000 sec  
TD0 1

----- CHANNEL f1 -----

SFO1 100.6204993 MHz  
NUC1 13C  
P1 8.20 usec  
PLW1 70.59999847 W

----- CHANNEL f2 -----

SFO2 400.1621006 MHz  
NUC2 1H  
CPCPRG[2] waltz16  
PCPD2 90.00 usec  
PLW2 14.00000000 W  
PLW12 0.28361999 W  
PLW13 0.21353000 W

F2 - Processing parameters

SI 32768  
SF 100.6204418 MHz  
WDW EM  
SSB 0  
LB 3.00 Hz  
GB 0  
PC 1.40

Figure 16:  $^{13}\text{C}$  -NMR Spectrum of **6g**.

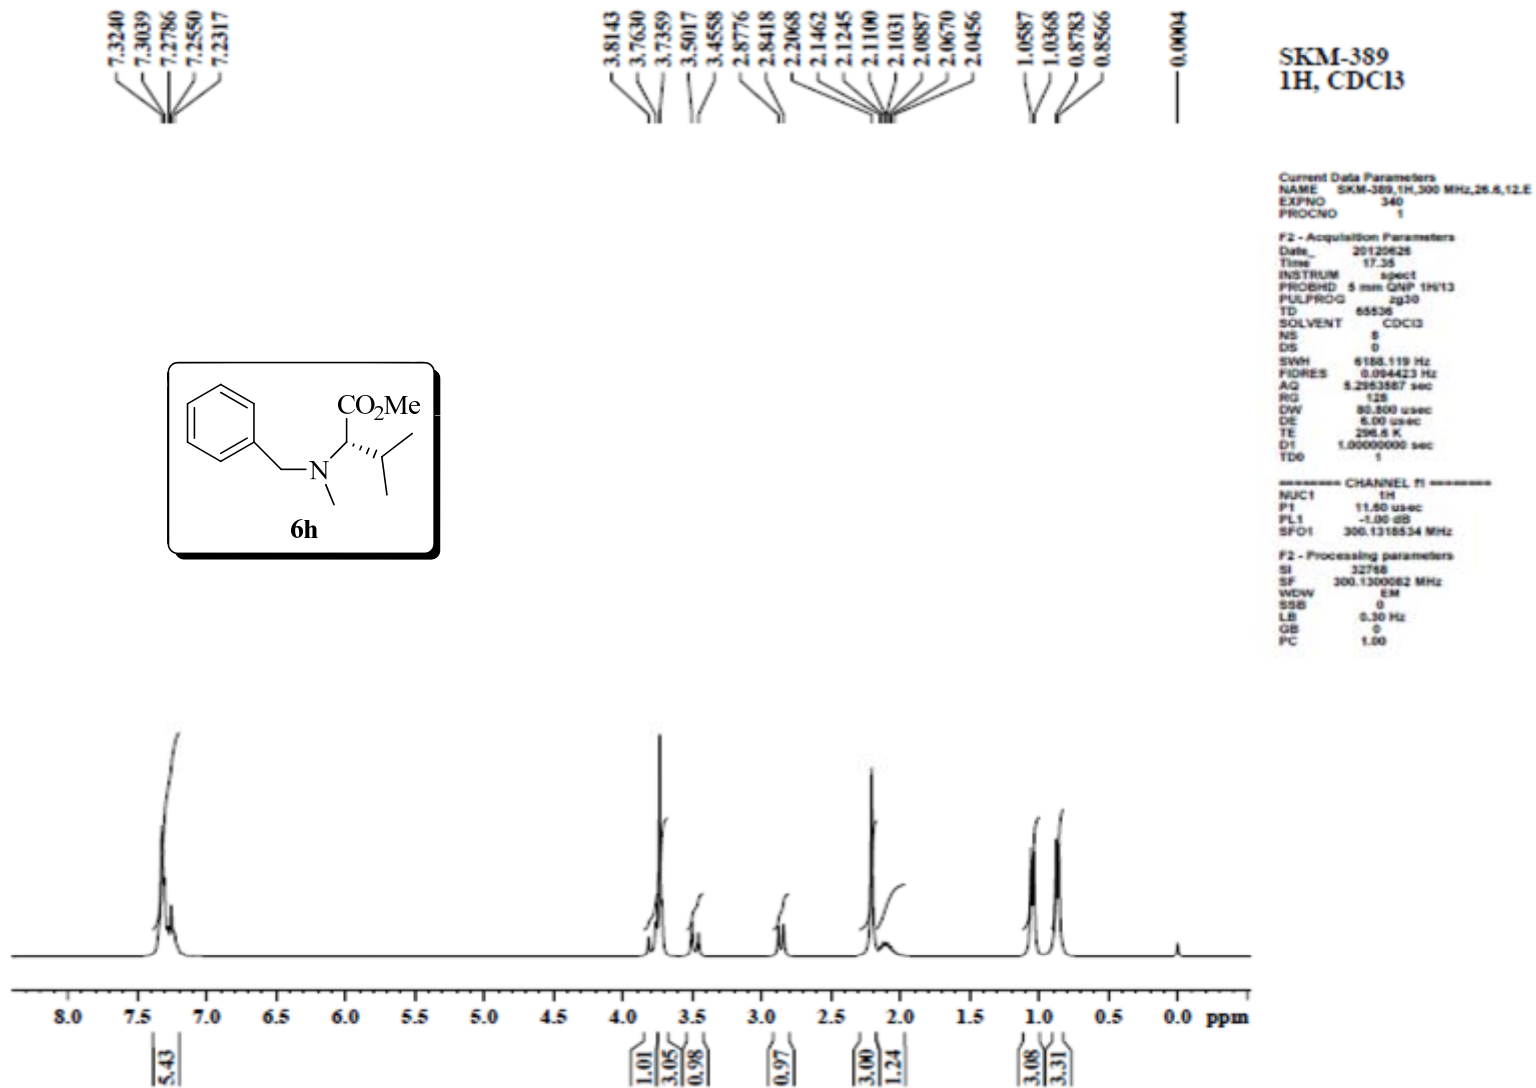

**Figure 17:**  $^1\text{H}$ -NMR Spectrum of **6h**.

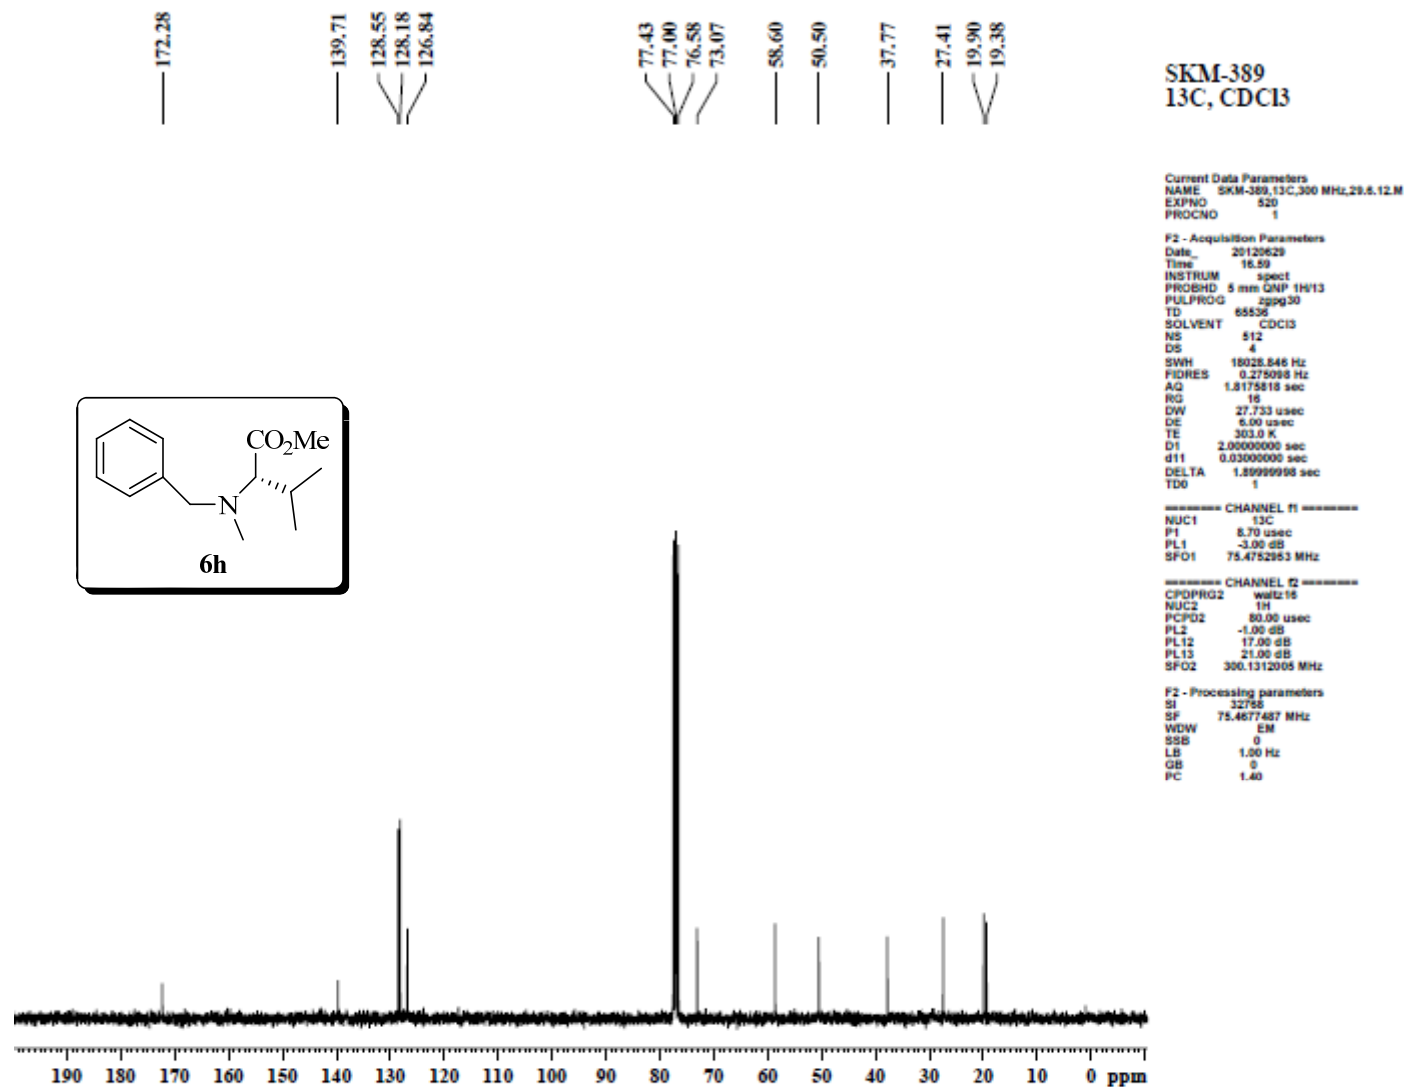

**Figure 18:** <sup>13</sup>C -NMR Spectrum of **6h**.

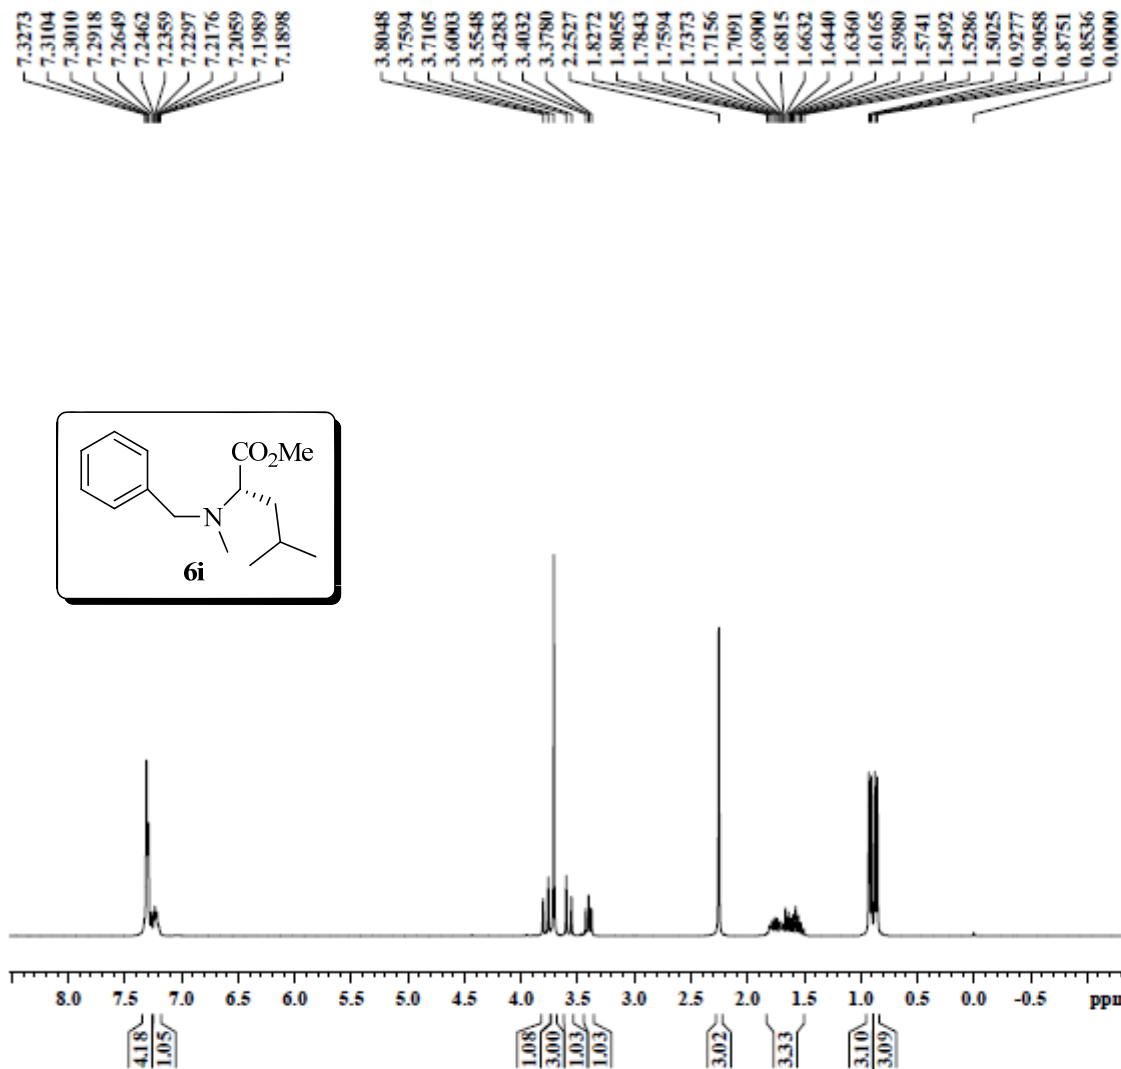

SKM-435  
1H, CDCl3

Current Data Parameters  
NAME SKM-435, 1H, 300 MHz, 24.8.12.M  
EXPNO 400  
PROCNO 1

F2 - Acquisition Parameters  
Date\_ 20120627  
Time 17.53  
INSTRUM spect  
PROBHD 5 mm QNP 1H/13  
PULPROG zg30  
TD 65536  
SOLVENT CDCl3  
NS 8  
DS 2  
SWH 8155.119 Hz  
FIDRES 0.094423 Hz  
AQ 5.2953587 sec  
RG 32  
DW 86.800 usec  
DE 15.00 usec  
TE 300.0 K  
D1 1.00000000 sec  
TDO 1

===== CHANNEL f1 =====  
NUC1 1H  
P1 10.00 usec  
PL1 -1.00 dB  
PL1W 15.52081971 W  
SFO1 300.1318534 MHz

F2 - Processing parameters  
SI 32768  
SF 300.1300249 MHz  
WDW EM  
SSB 0  
LB 0.30 Hz  
GB 0  
PC 1.00

Figure 19:  $^1\text{H}$ -NMR Spectrum of **6i**.

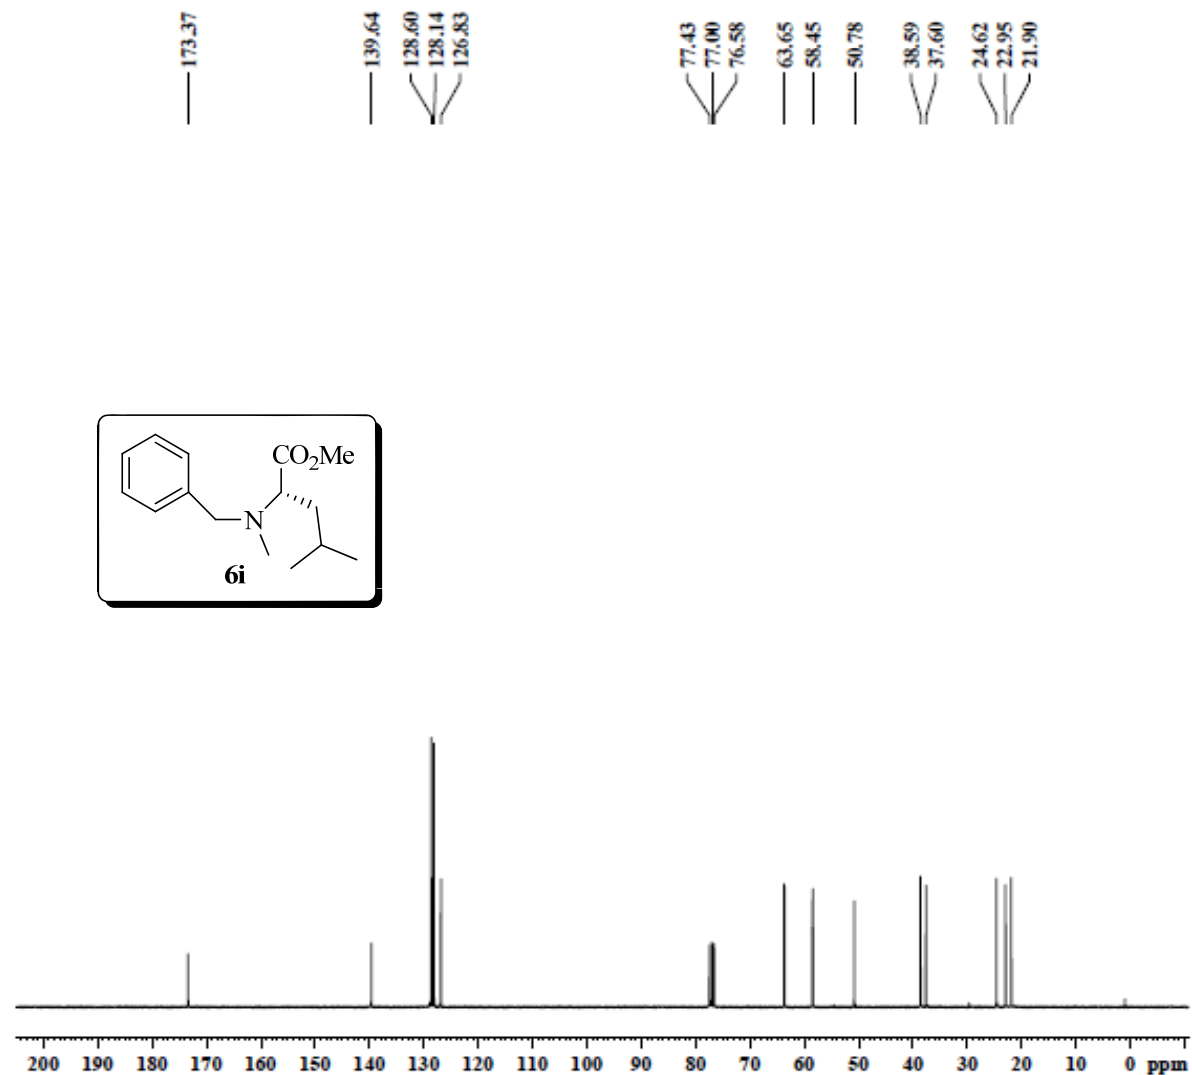

SKM-435  
13C, CDCl3

Current Data Parameters  
NAME SKM-435,13C,300 MHz,31.8.12.M  
EXPNO 470  
PROCNO 1

F2 - Acquisition Parameters  
Date\_ 20120602  
Time 8.05  
INSTRUM spect  
PROBHD 5 mm QNP 1H/13  
PULPROG zgpg30  
TD 65536  
SOLVENT CDCl3  
NS 512  
DS 4  
SWH 18028.846 Hz  
FIDRES 0.275098 Hz  
AQ 1.8175818 sec  
RG 2050  
DW 27.733 usec  
DE 15.00 usec  
TE 300.0 K  
D1 2.00000000 sec  
D11 0.03000000 sec  
TD0 1

===== CHANNEL f1 =====  
NUC1 13C  
P1 8.15 usec  
PL1 -3.00 dB  
PL1W 55.13059616 W  
SFO1 75.4752853 MHz

===== CHANNEL f2 =====  
CPDPRG2 waltz16  
NUC2 1H  
PCPD2 80.00 usec  
PL2 -1.00 dB  
PL12 17.06 dB  
PL13 21.00 dB  
PL2W 15.02081871 W  
PL12W 0.23479761 W  
PL13W 0.09477498 W  
SFO2 300.1312005 MHz

F2 - Processing parameters  
SI 32768  
SF 75.4677550 MHz  
WDW EM  
SSB 0  
LB 1.00 Hz  
GB 0  
PC 1.40

Figure 20: <sup>13</sup>C -NMR Spectrum of **6i**.



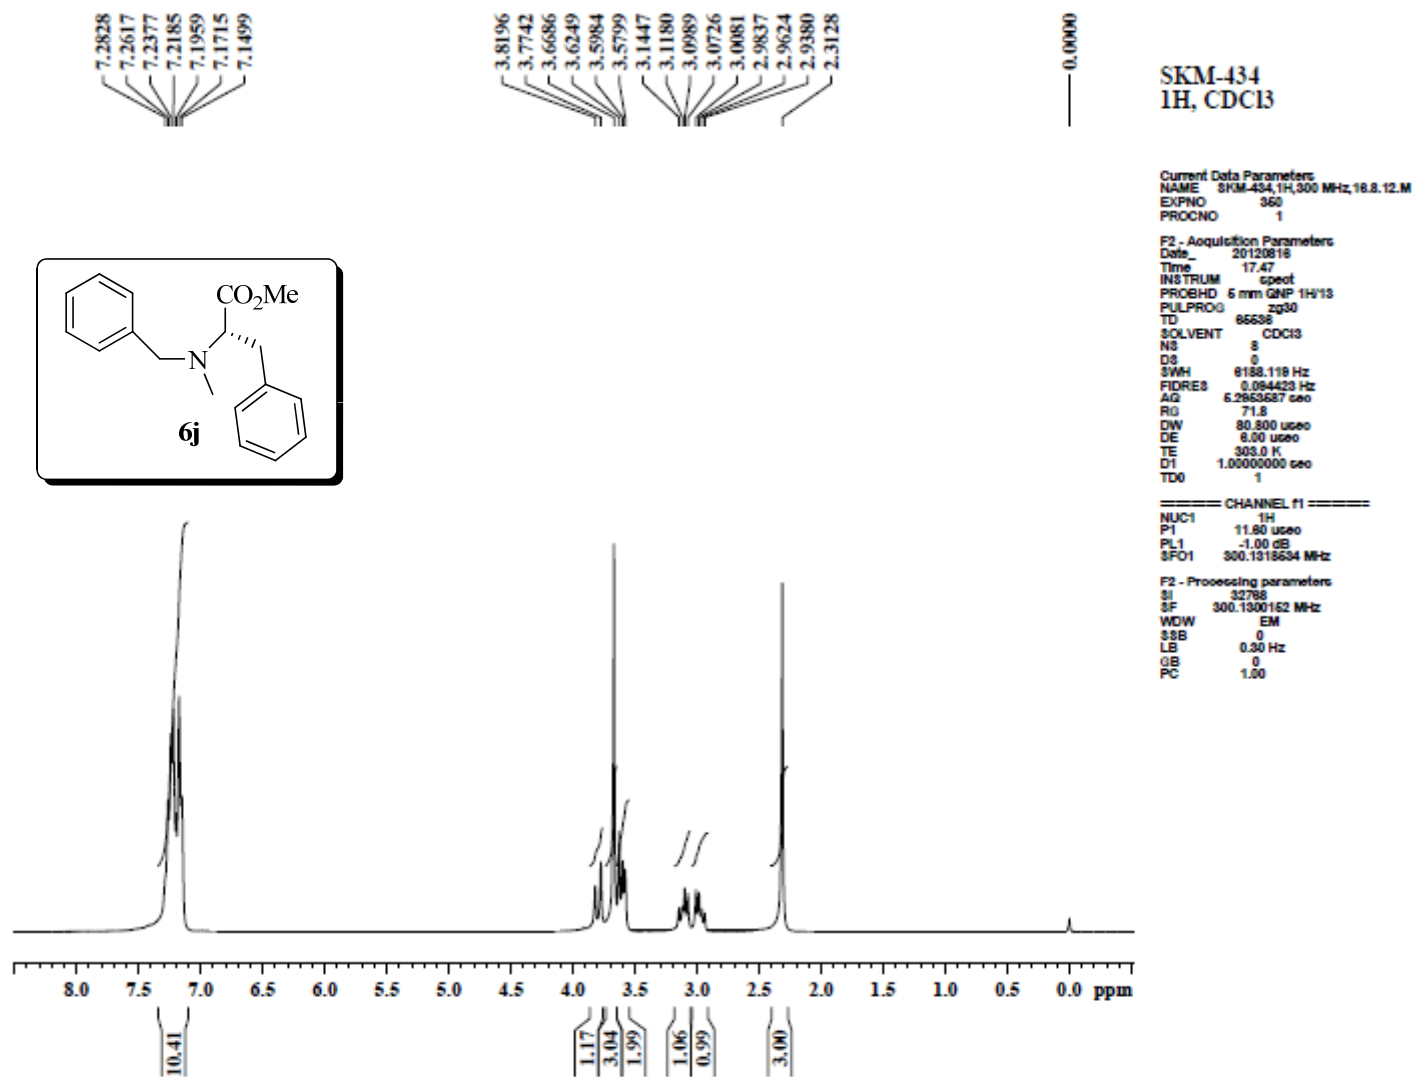

Figure 21: <sup>1</sup>H -NMR Spectrum of **6j**.

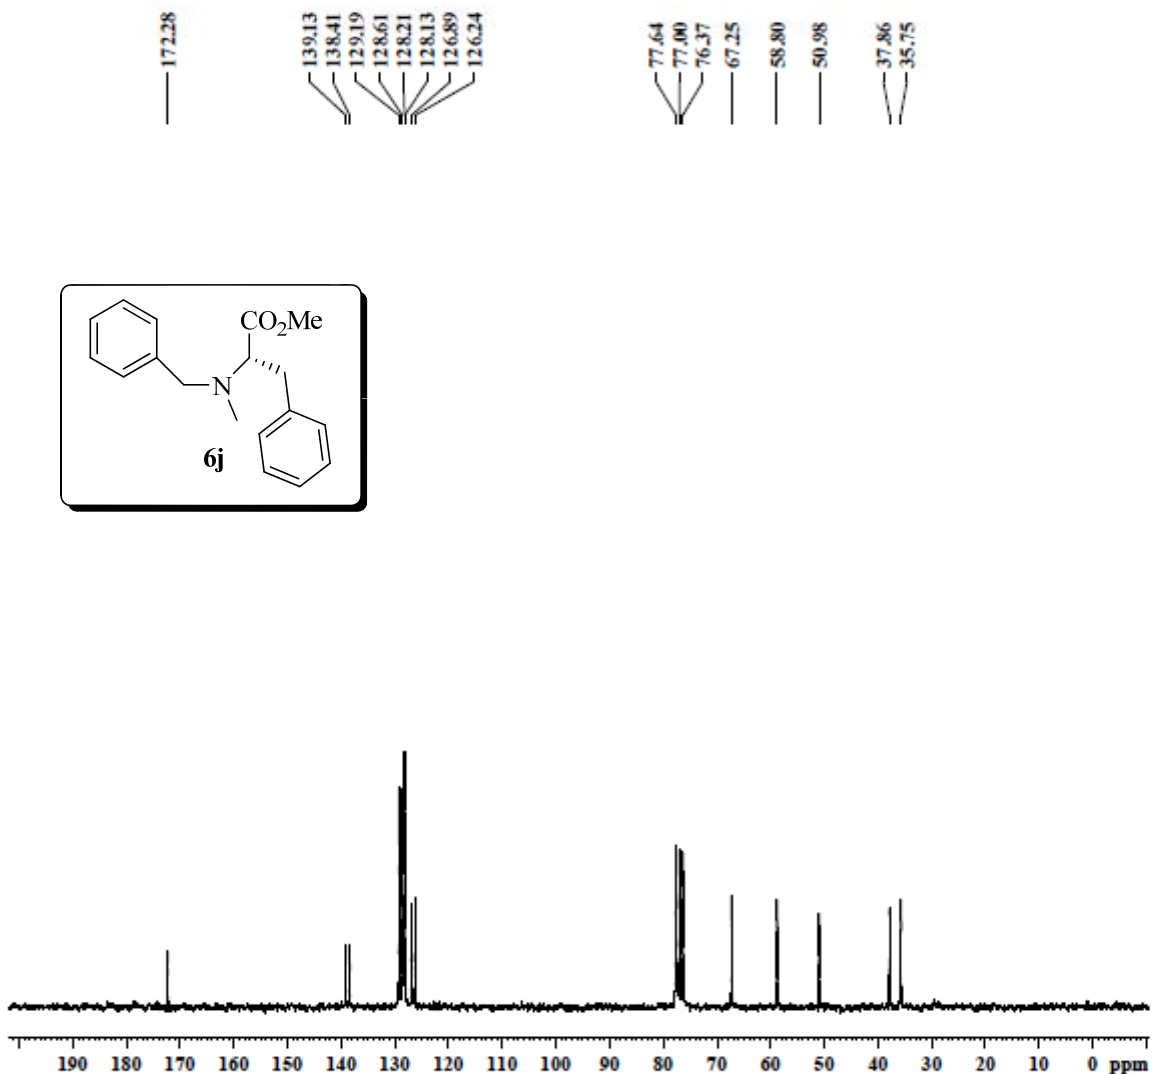

SKM-434  
13C, CDCl3

```

Current Data Parameters
NAME SKM-434, 13C, 200 MHz, 30.08.12.M
EXPNO 350
PROCNO 1

F2 - Acquisition Parameters
Date_ 20120904
Time 11.19
INSTRUM spect
PROBHD 5 mm Dual 13C/
PULPROG zgpg30
TD 65536
SOLVENT CDCl3
NS 512
DS 4
SWH 11996.407 Hz
FIDRES 0.182989 Hz
AQ 2.7329911 sec
RG 57
DW 41.700 usec
DE 6.30 usec
TE 300.2 K
D1 2.00000000 sec
d11 0.03000000 sec
DELTA 1.20000000 sec
MCREST 0.00000000 sec
MCWRC 0.01000000 sec

===== CHANNEL f1 =====
NUC1 13C
P1 6.30 usec
PL1 -4.00 dB
SFO1 50.3277608 MHz

===== CHANNEL f2 =====
CPDPRG2 waltz16
NUC2 1H
PCPD2 100.00 usec
PL3 -4.00 dB
PL12 19.30 dB
PL13 22.00 dB
SFO2 200.1300005 MHz

F2 - Processing parameters
SI 32768
SF 50.3277124 MHz
WDW EM
SSB 0
LB 3.00 Hz
GB 0
PC 1.40

```

Figure 22: <sup>13</sup>C -NMR Spectrum of **6j**.

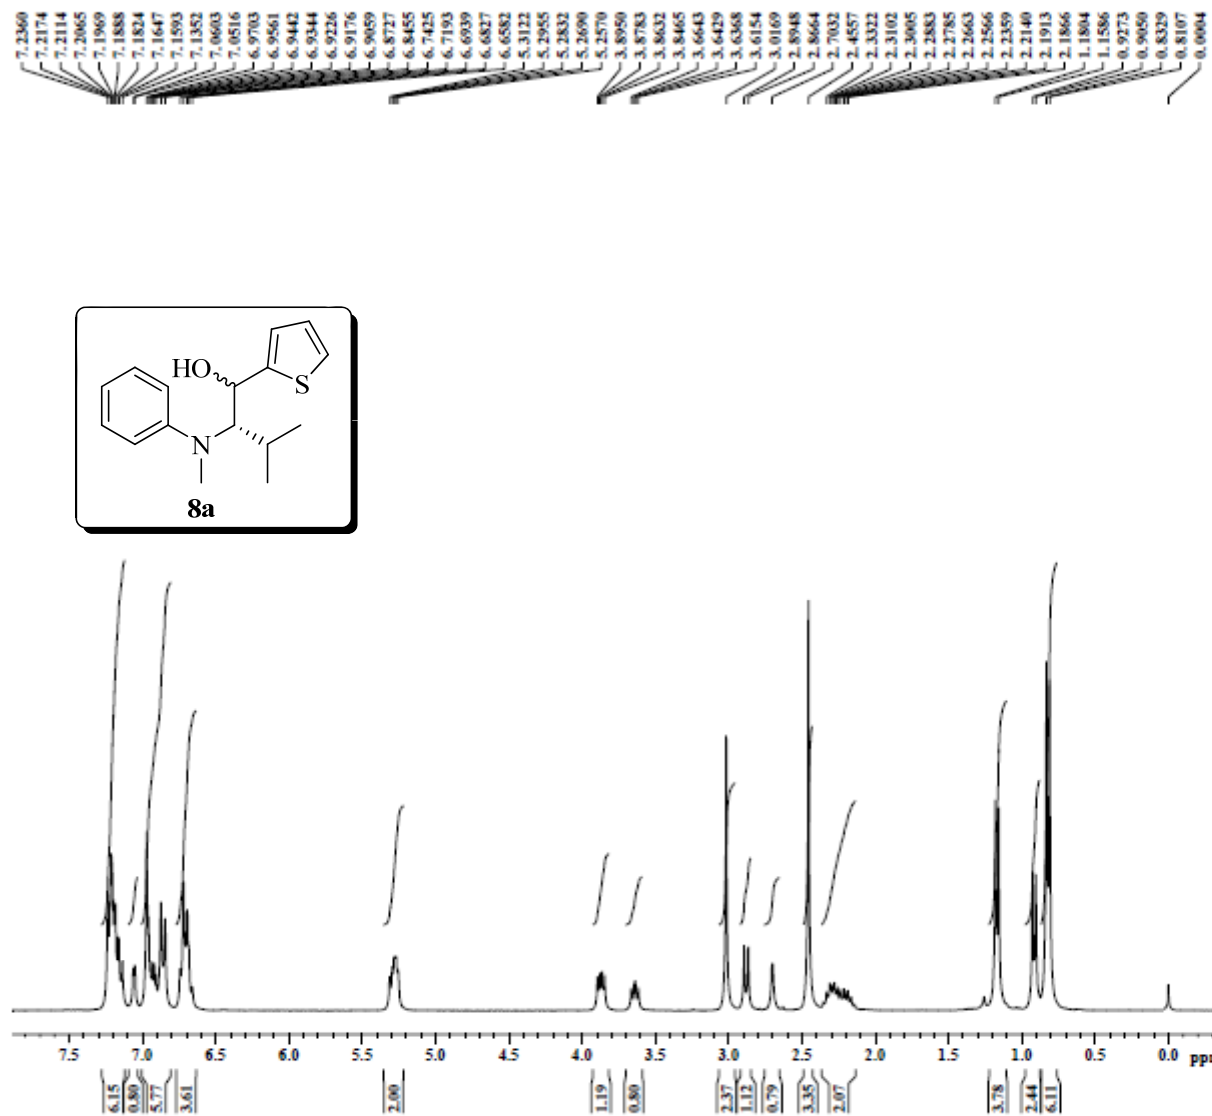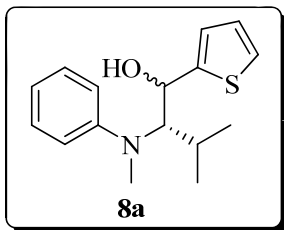

SKM-200  
1H, CDCl3

Current Data Parameters  
NAME SKM-200,1H,300 MHz,14.7.11.M  
EXPNO 440  
PROCNO 1

F2 - Acquisition Parameters  
Date\_ 20110714  
Time 14.04  
INSTRUM spect  
PROBHD 5 mm QNP 1H/13  
PULPROG zg30  
TD 65536  
SOLVENT CDCl3  
NS 8  
DS 0  
SWH 6188.119 Hz  
FIDRES 0.094423 Hz  
AQ 5.2953587 sec  
RG 101  
DW 80.800 usec  
DE 5.00 usec  
TE 300.0 K  
D1 1.00000000 sec  
TD0 1

CHANNEL f1  
NUC1 1H  
P1 11.80 usec  
PL1 -1.00 dB  
SFO1 300.1318534 MHz

F2 - Processing parameters  
SI 32768  
SF 300.1300135 MHz  
WDW EM  
SSB 0  
LB 0.30 Hz  
GB 0  
PC 1.00

Figure 23: <sup>1</sup>H -NMR Spectrum of **8a**.

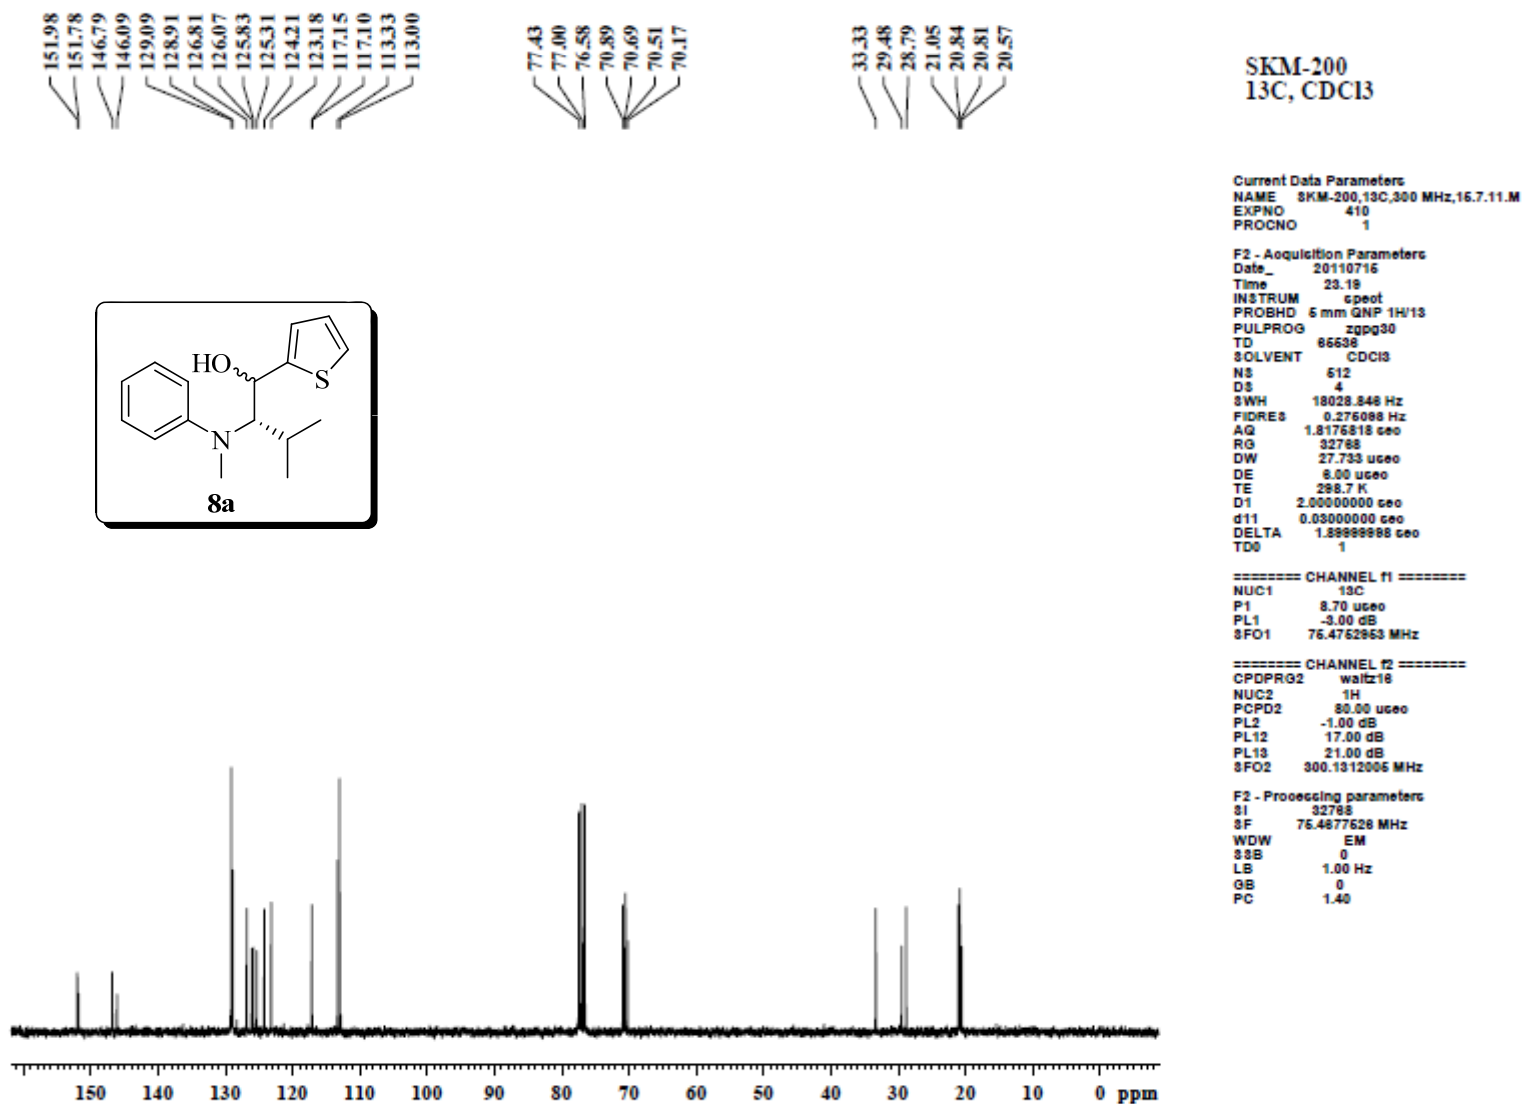

**Figure 24:**  $^{13}\text{C}$  -NMR Spectrum of **8a**.

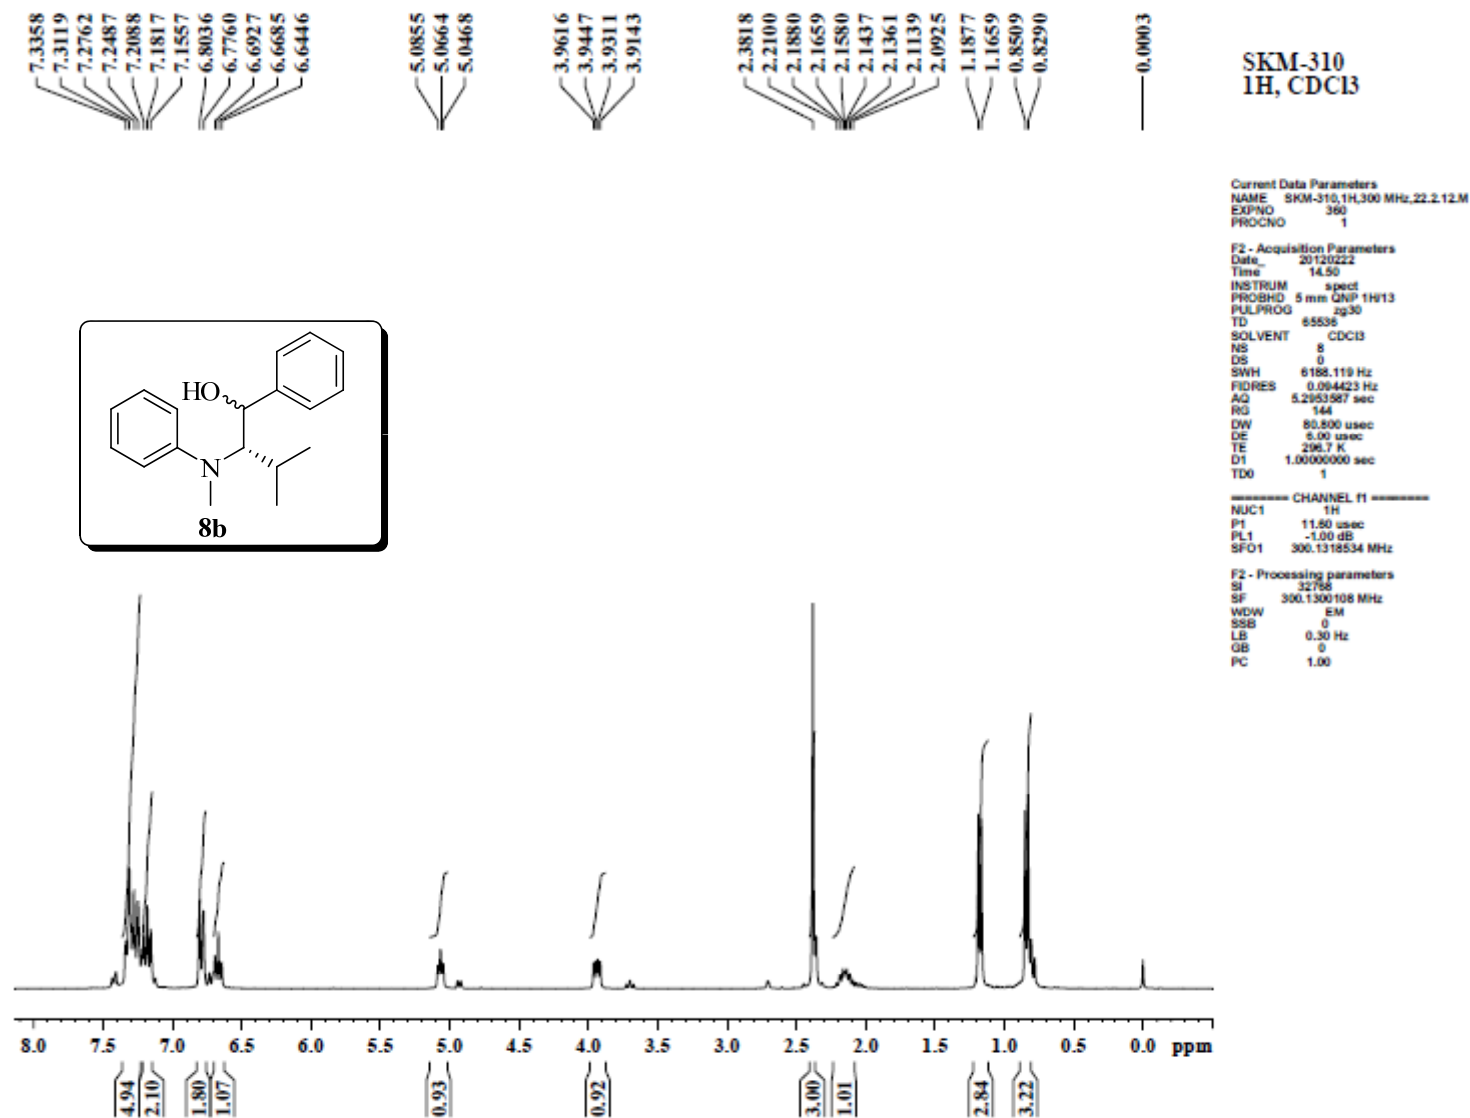

**Figure 25:**  $^1\text{H}$ -NMR Spectrum of **8b**.

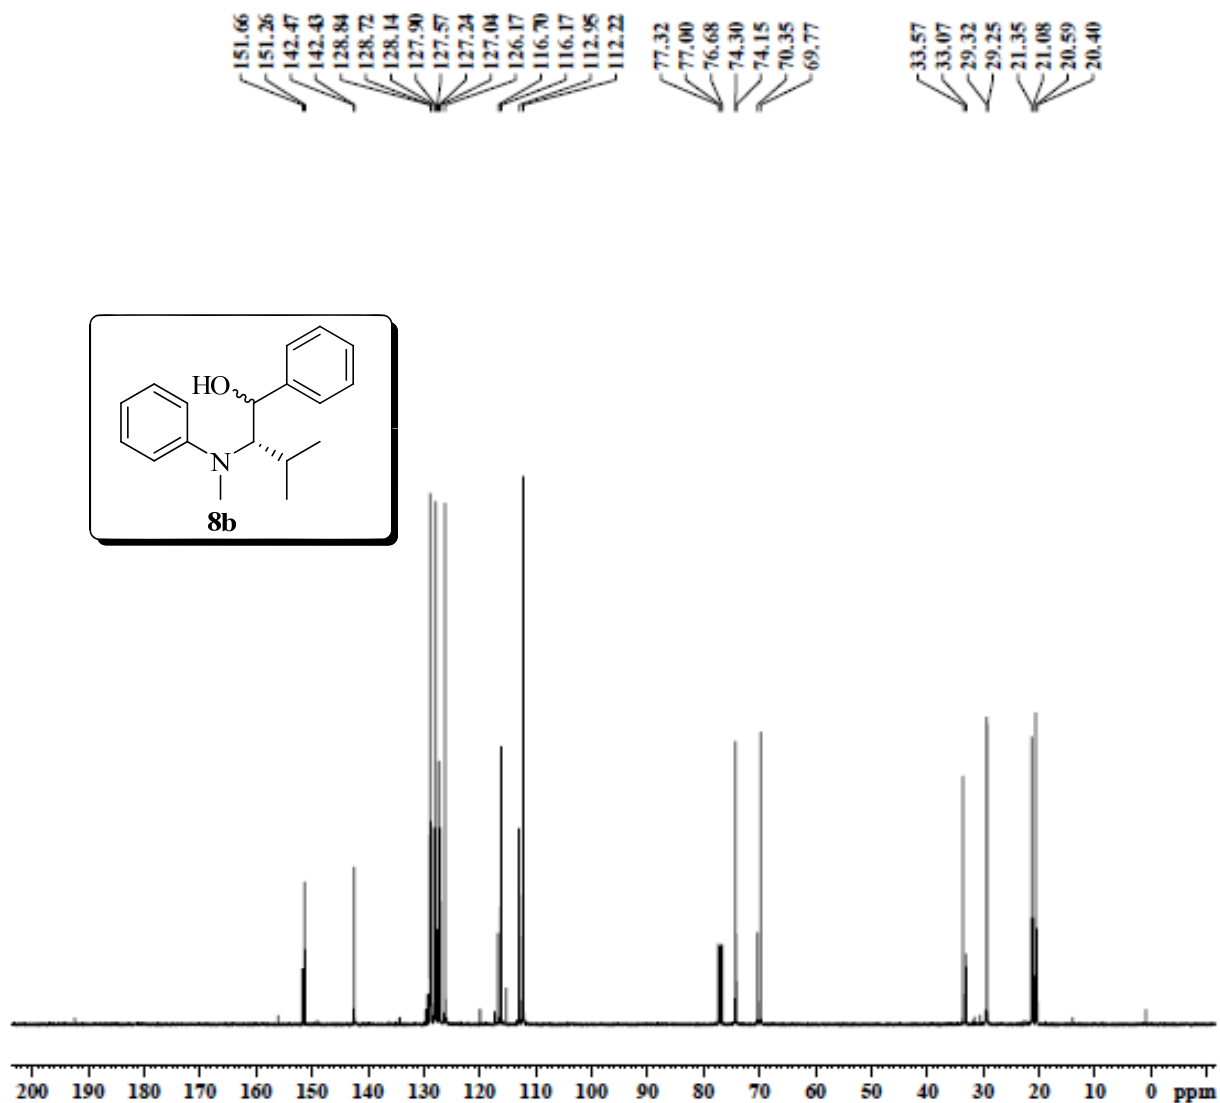

SKM-310  
13C, CDC13

Current Data Parameters  
NAME SKM-310,13C,400 MHz,2 Jan,2014,E  
EXPNO 30  
PROCNO 1

F2 - Acquisition Parameters  
Date\_ 20140103  
Time 14.25  
INSTRUM spect  
PROBHD 5 mm PABBO BB/  
PULPROG zgpg30  
TD 65536  
SOLVENT CDC13  
NS 200  
DS 4  
SWH 24038.461 Hz  
FIDRES 0.386798 Hz  
AQ 1.3631488 sec  
RG 201.48  
DW 20.800 usec  
DE 0.50 usec  
TE 300.0 K  
D1 2.00000000 sec  
D11 0.03000000 sec  
TD0 1

----- CHANNEL f1 -----  
SFO1 100.6204993 MHz  
NUC1 13C  
PI 8.20 usec  
PLW1 70.59999847 W

----- CHANNEL f2 -----  
SFO2 400.1621006 MHz  
NUC2 1H  
CPDPRG2 waltz16  
PCPD2 90.00 usec  
PLW2 14.50000000 W  
PLW3 0.26381999 W  
PLW13 0.21353000 W

F2 - Processing parameters  
SI 32768  
SF 100.6204708 MHz  
WDW EM  
SSB 0  
LB 1.00 Hz  
GB 0  
PC 1.40

Figure 26:  $^{13}\text{C}$  -NMR Spectrum of **8b**.

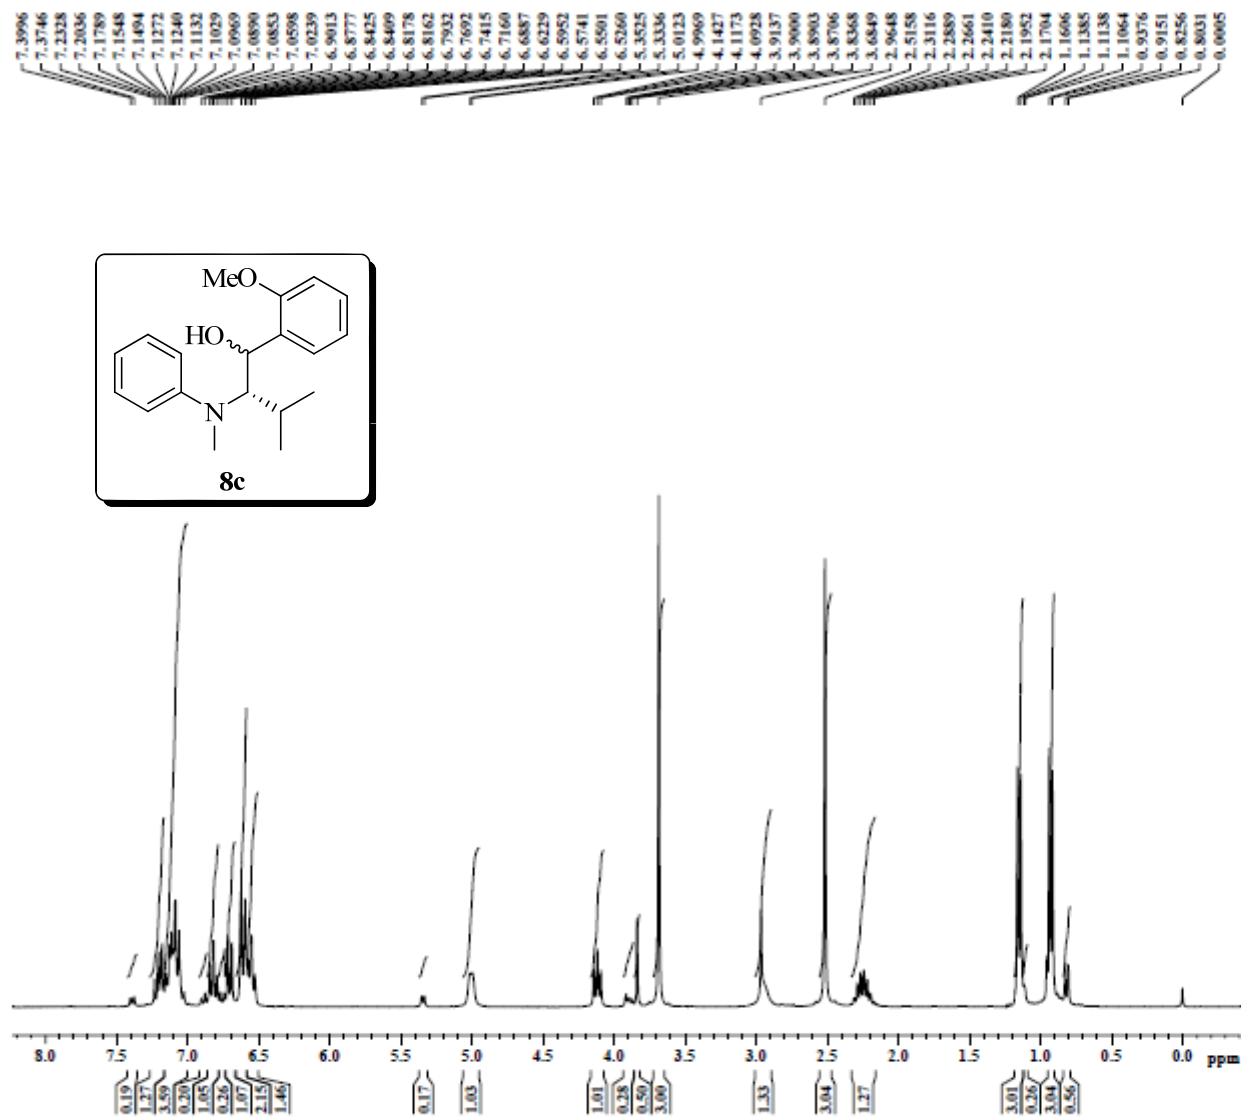

SKM-299  
1H, CDC13

Current Data Parameters  
NAME SKM-299.1H.300 MHz.3.2.12.M  
EXPNO 490  
PROCNO 1

F2 - Acquisition Parameters  
Date\_ 20120204  
Time 10.20  
INSTRUM spect  
PROBHD 5 mm QNP 1H/13  
PULPROG zg30  
TD 65536  
SOLVENT CDC13  
NS 8  
DS 0  
SWH 8188.119 Hz  
FIDRES 0.094423 Hz  
AQ 5.293387 sec  
RG 64  
DW 80.800 usec  
DE 6.00 usec  
TE 300.0 K  
D1 1.00000000 sec  
TD0 1

----- CHANNEL f1 -----  
NUC1 1H  
P1 11.60 usec  
PL1 -1.00 dB  
SFO1 300.1318534 MHz

F2 - Processing parameters  
SI 32768  
SF 300.1300145 MHz  
WDW EM  
SSB 0  
LB 0.30 Hz  
GB 0  
PC 1.00

Figure 27: <sup>1</sup>H -NMR Spectrum of **8c**.

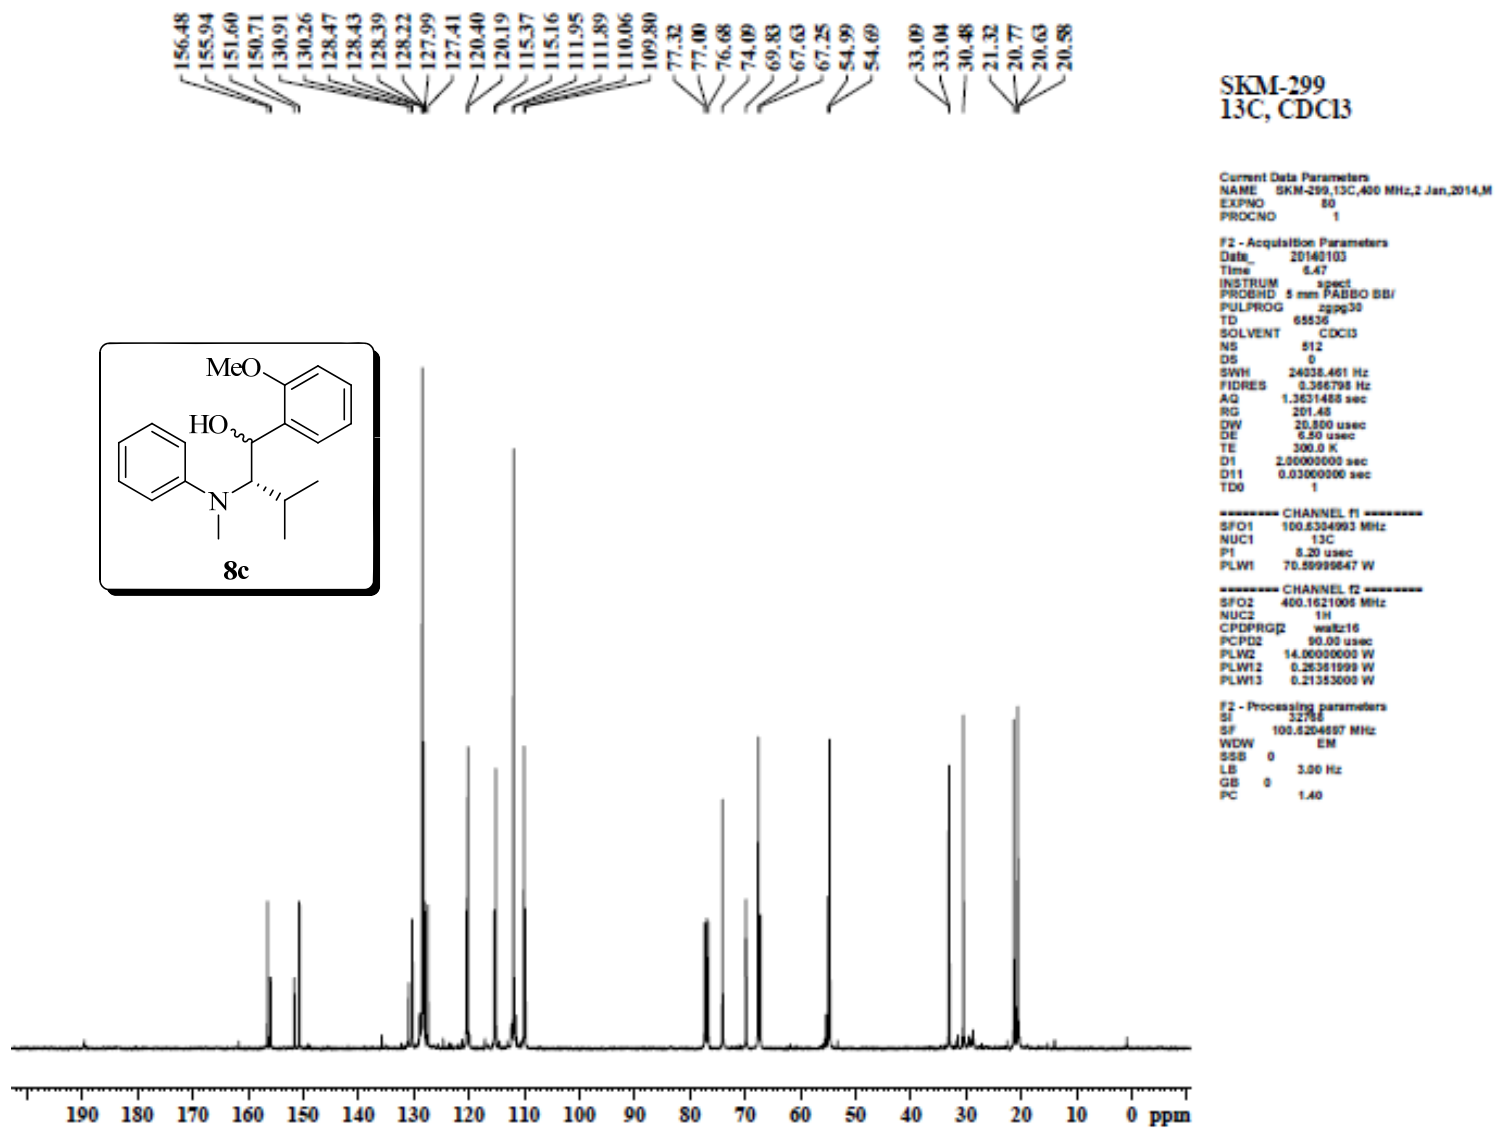

**Figure 28:**  $^{13}\text{C}$  -NMR Spectrum of **8c**.



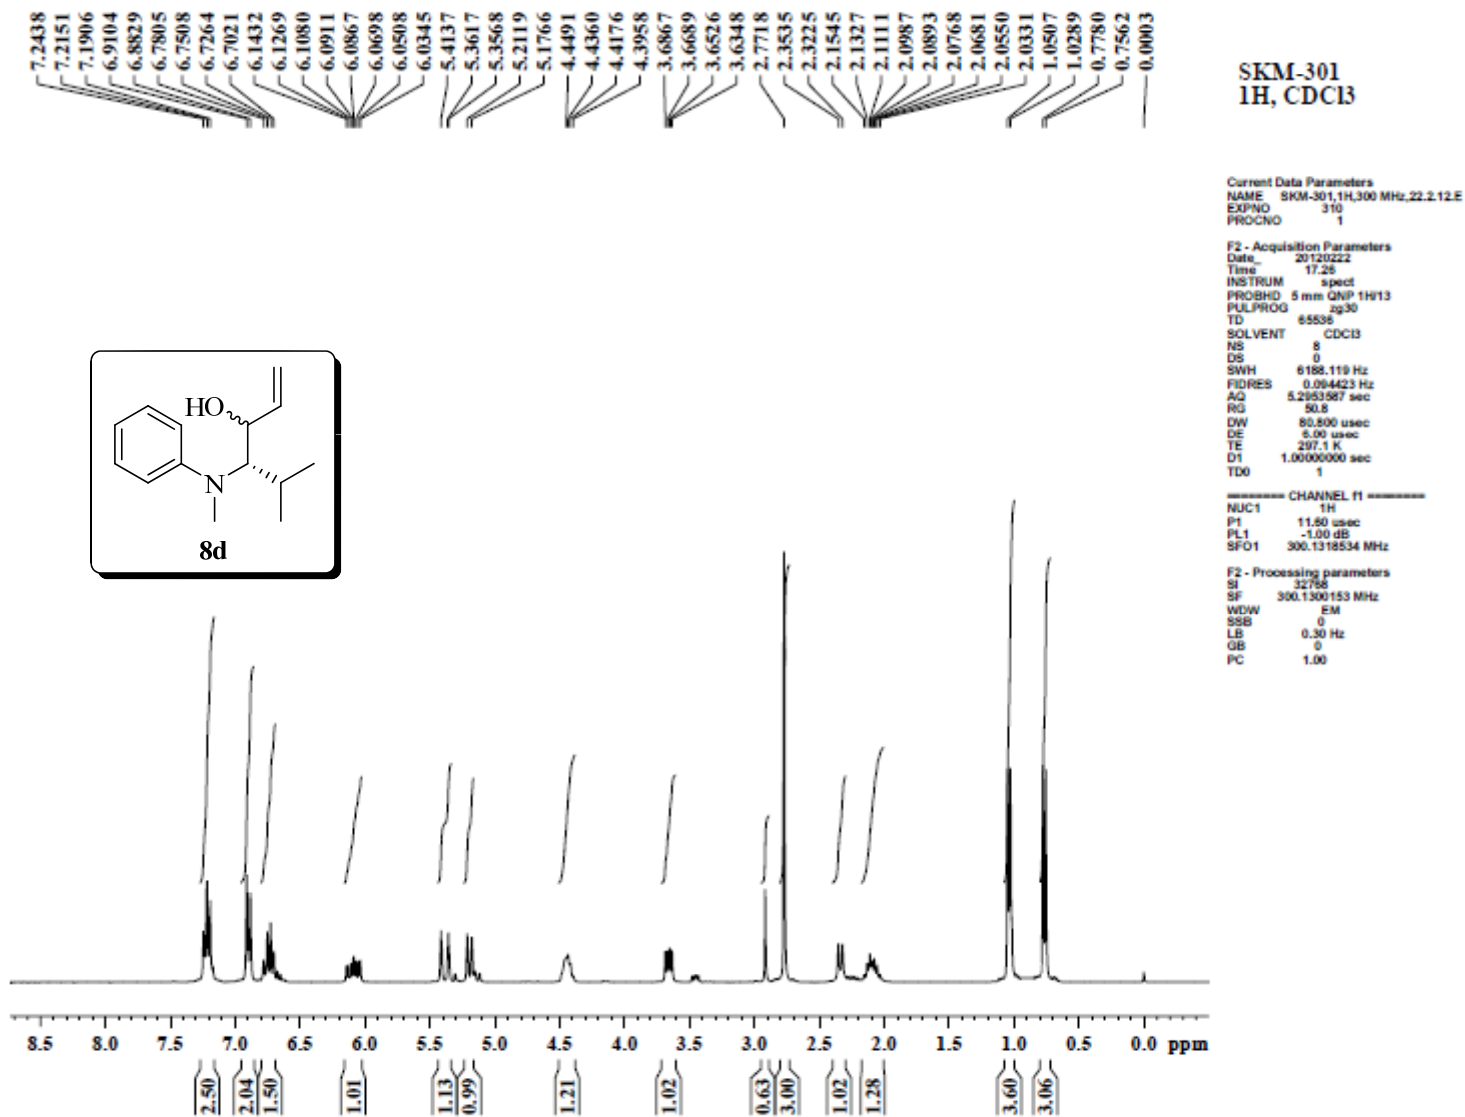

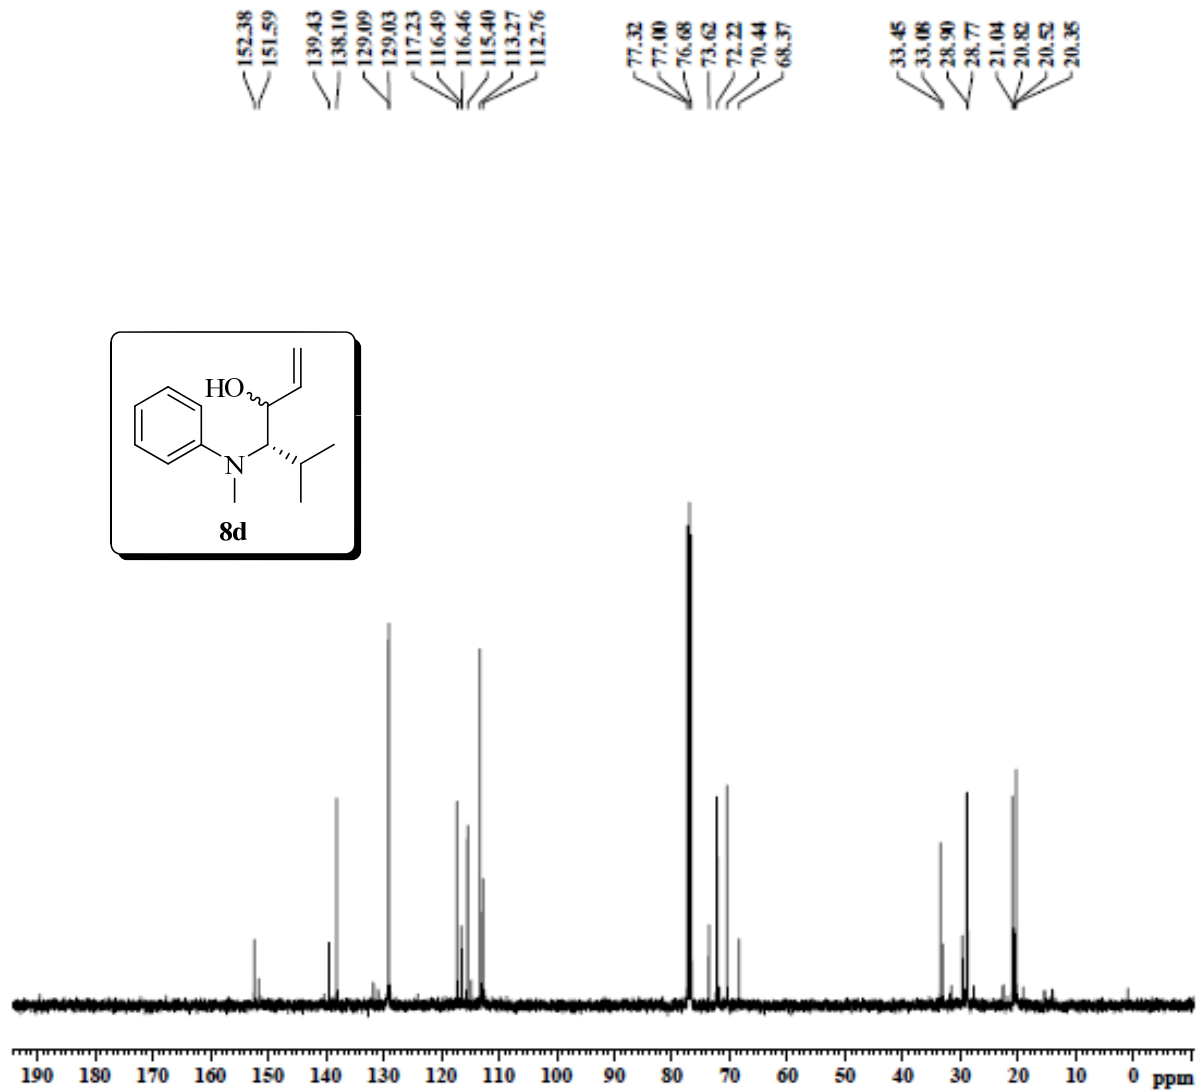

SKM-301  
13C, CDCl3

Current Data Parameters  
NAME SKM-301A, 13C, 400 MHz, 2 Jan, 2014, E  
EXPNO 70  
PROCNO 1

F2 - Acquisition Parameters  
Date\_ 20140104  
Time 2.22  
INSTRUM spect  
PROBHD 5 mm PABBO BB/  
PULPROG zgpg30  
TD 65536  
SOLVENT CDCl3  
NS 512  
DS 4  
SWH 24038.461 Hz  
FIDRES 0.366798 Hz  
AQ 1.3831488 sec  
RG 201.48  
DW 20.800 usec  
DE 6.50 usec  
TE 300.0 K  
D1 2.0000000 sec  
D11 0.0300000 sec  
TD0 1

----- CHANNEL f1 -----  
SFO1 100.6204993 MHz  
NUC1 13C  
P1 8.20 usec  
PLW1 70.59999547 W

----- CHANNEL f2 -----  
SFO2 400.1421006 MHz  
NUC2 1H  
PCPD2 waltz16  
PCPD2 90.00 usec  
PLW2 14.00000000 W  
PLW12 0.26381999 W  
PLW13 0.21353000 W

F2 - Processing parameters  
SI 32768  
SF 100.6204004 MHz  
WDW EM  
SSB 0  
LB 1.00 Hz  
GB 0  
PC 1.40

Figure 30: <sup>13</sup>C -NMR Spectrum of **8d**.

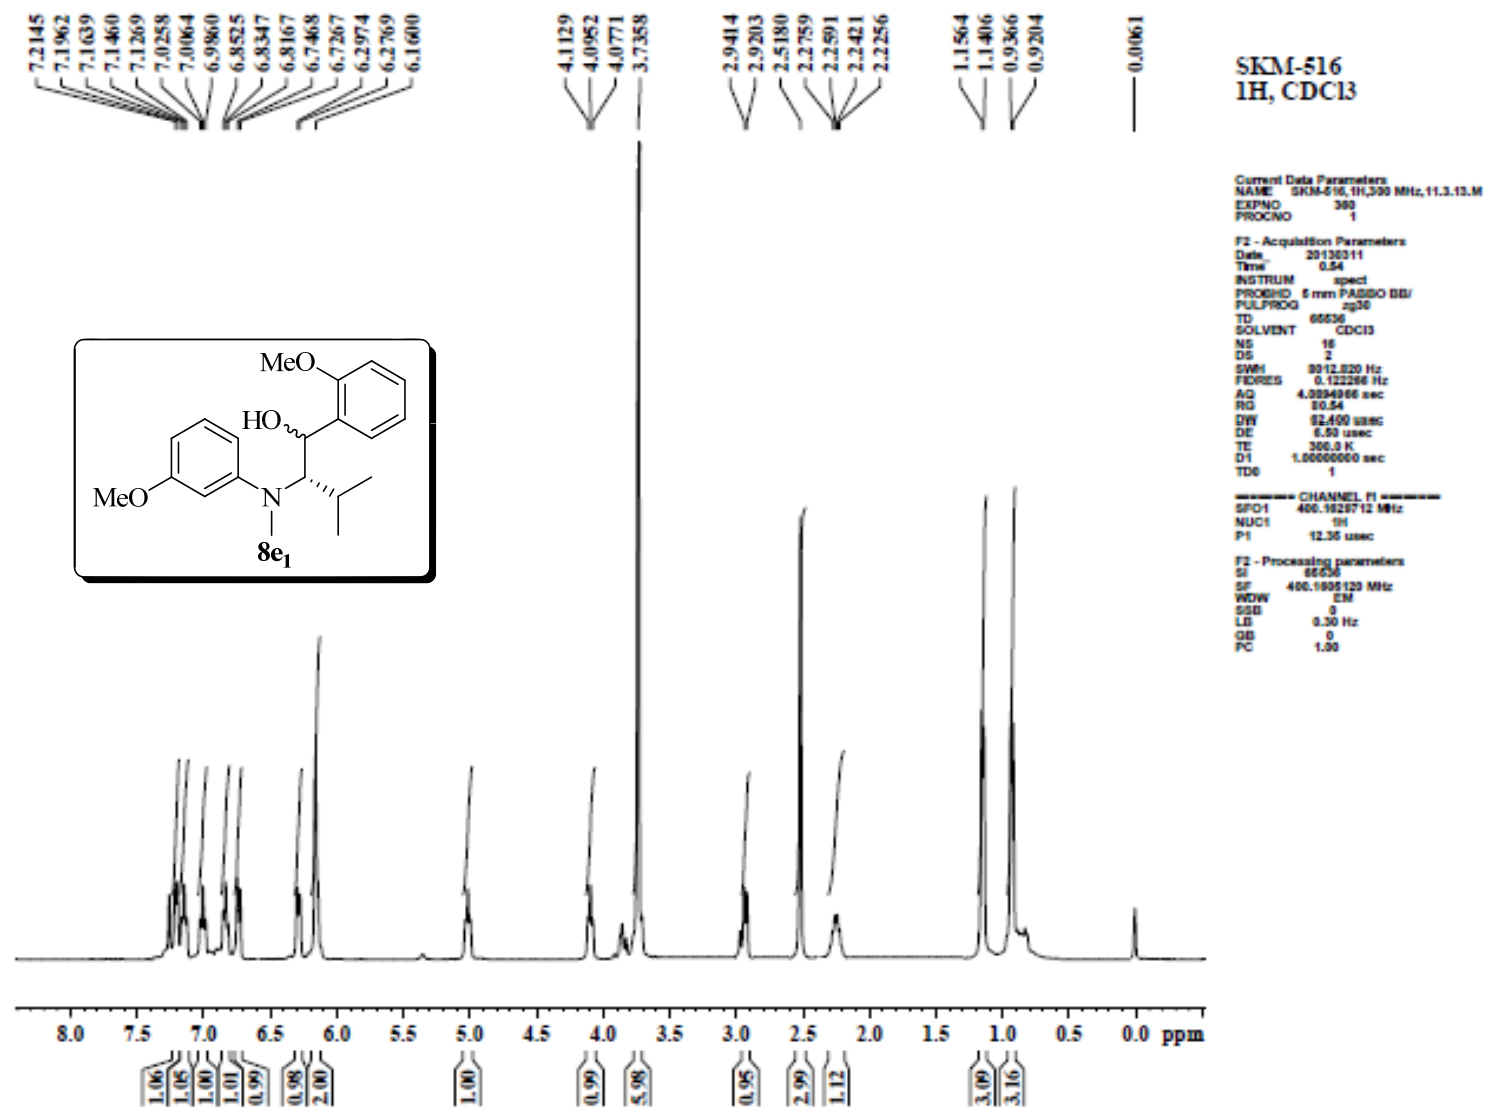

**Figure 31:** <sup>1</sup>H -NMR Spectrum of **8e<sub>1</sub>**.

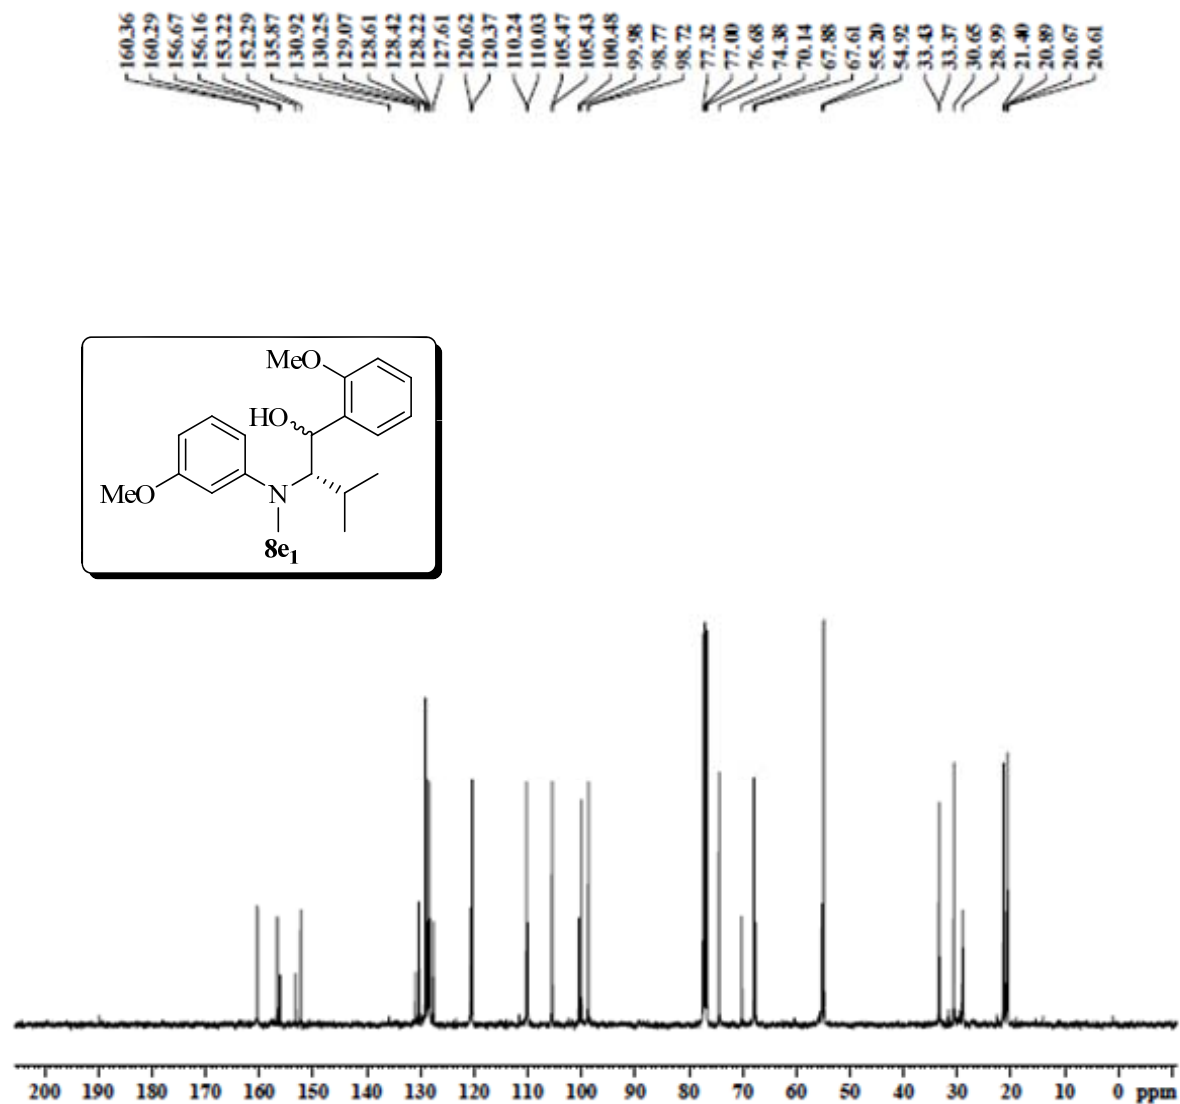

SKM-516  
13C, CDC13

Current Data Parameters  
NAME SKM-516,13C,400 MHz,1 Jan,2014,M  
EXPNO 60  
PROCNO 1

F2 - Acquisition Parameters  
Date\_ 20140102  
Time 4.35  
INSTRUM spect  
PROBHD 5 mm F400 BB/  
PULPROG zgpg30  
TD 65536  
SOLVENT CDC13  
NS 812  
DS 4  
SWH 24038.461 Hz  
FIDRES 0.368798 Hz  
AQ 1.3631468 sec  
RG 201.48  
QW 20.800 usec  
DE 6.00 usec  
TE 300.0 K  
D1 2.0000000 sec  
D11 0.0300000 sec  
TD0 1

\*\*\*\*\* CHANNEL f1 \*\*\*\*\*  
SFO1 100.6204993 MHz  
NUC1 13C  
P1 8.20 usec  
PLW1 70.50998647 W

\*\*\*\*\* CHANNEL f2 \*\*\*\*\*  
SFO2 400.1621005 MHz  
NUC2 1H  
CPCPRG2 waltz16  
PCPD2 90.00 usec  
PLW2 14.90000000 W  
PLW12 0.28381999 W  
PLW13 0.21350000 W

F2 - Processing parameters  
SI 32768  
SF 100.6204477 MHz  
WDW EM  
SSB 0  
LB 3.00 Hz  
GB 0  
PC 1.40

Figure 32: <sup>13</sup>C -NMR Spectrum of **8e<sub>1</sub>**.

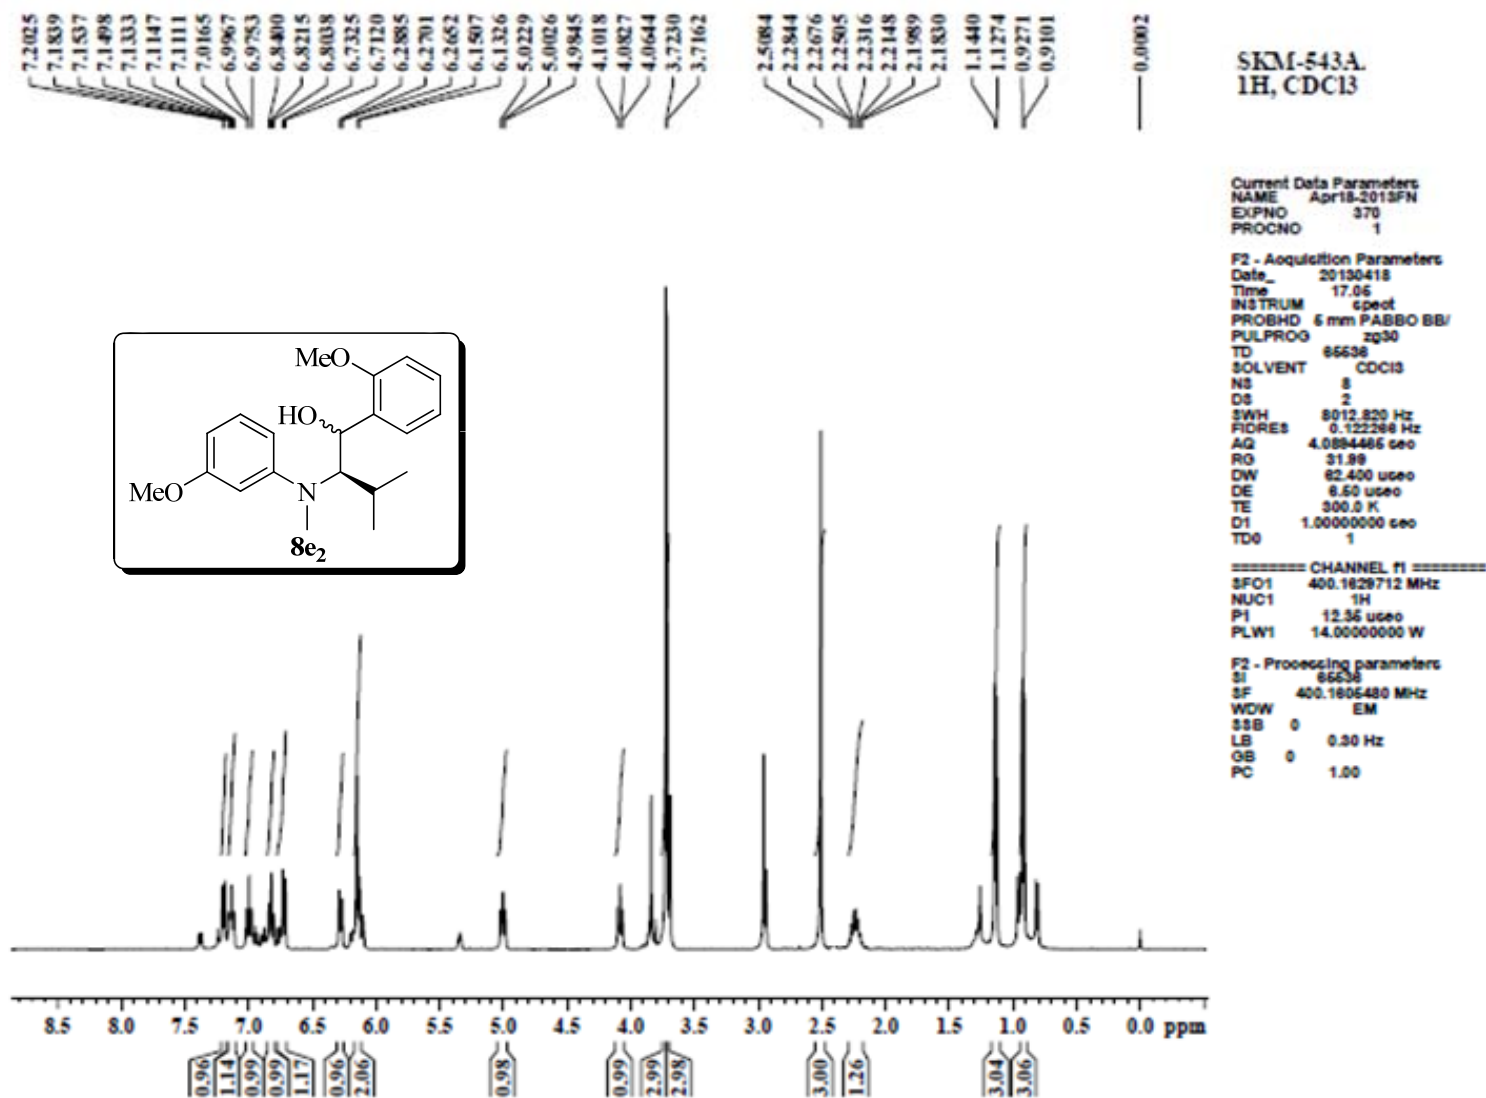

Figure 33: <sup>1</sup>H -NMR Spectrum of **8e<sub>2</sub>**.

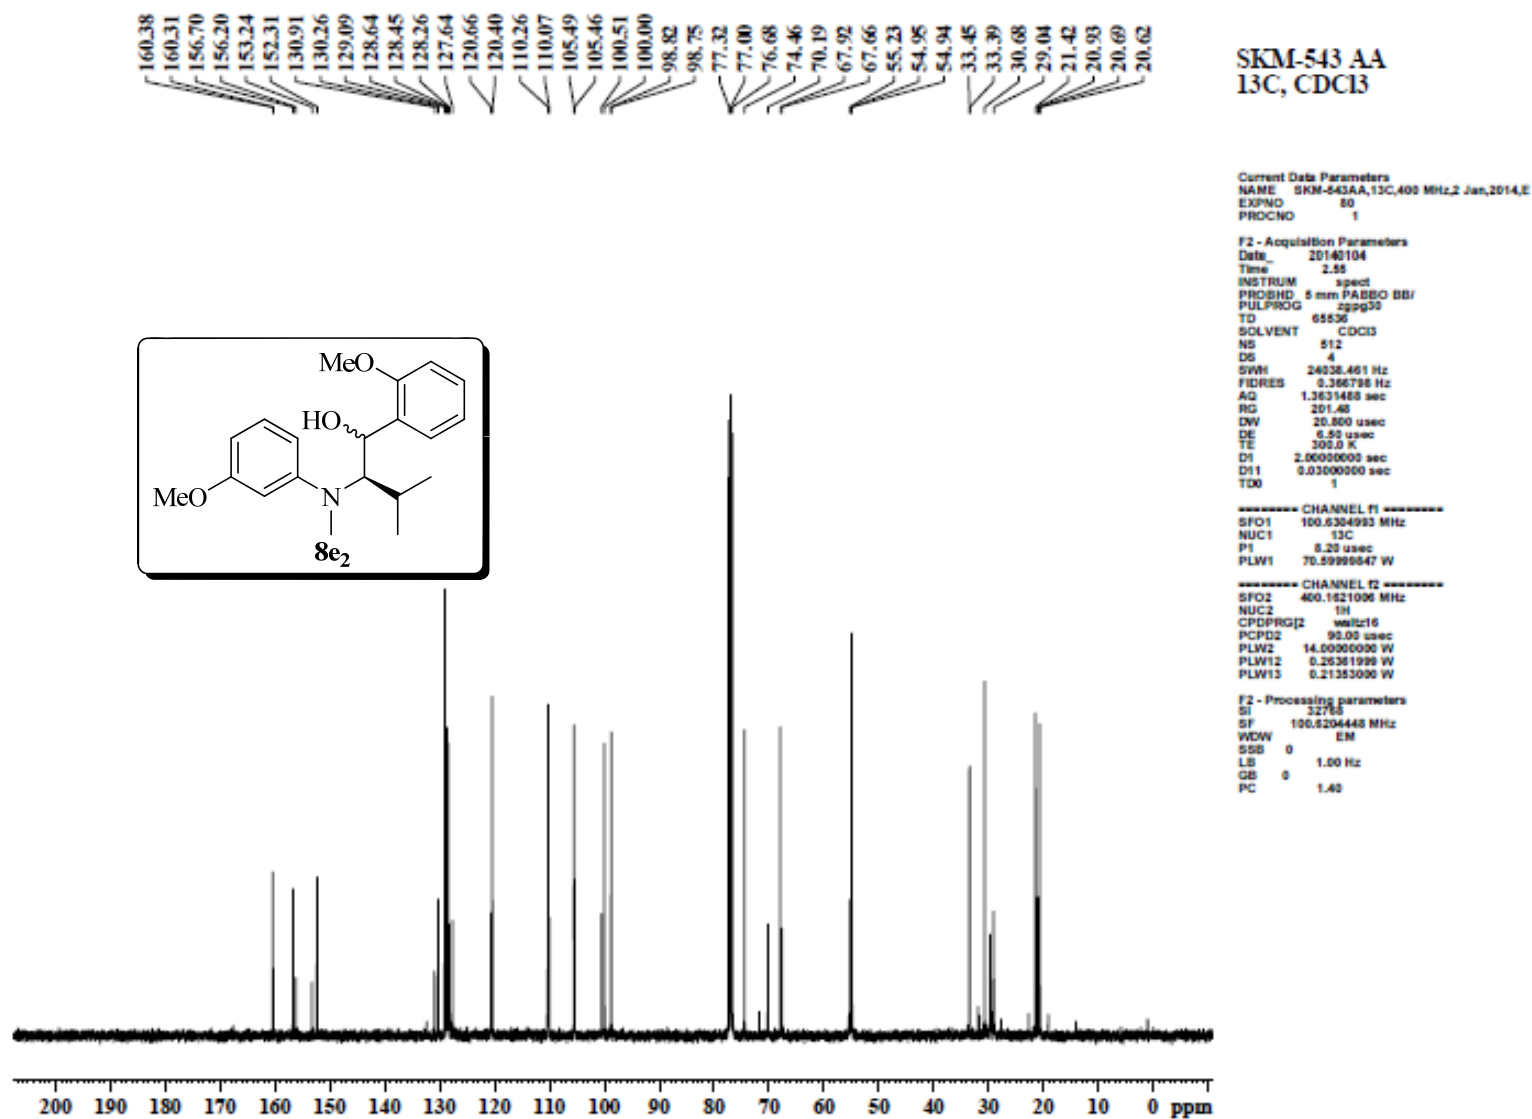

Figure 34: <sup>13</sup>C -NMR Spectrum of 8e<sub>2</sub>.

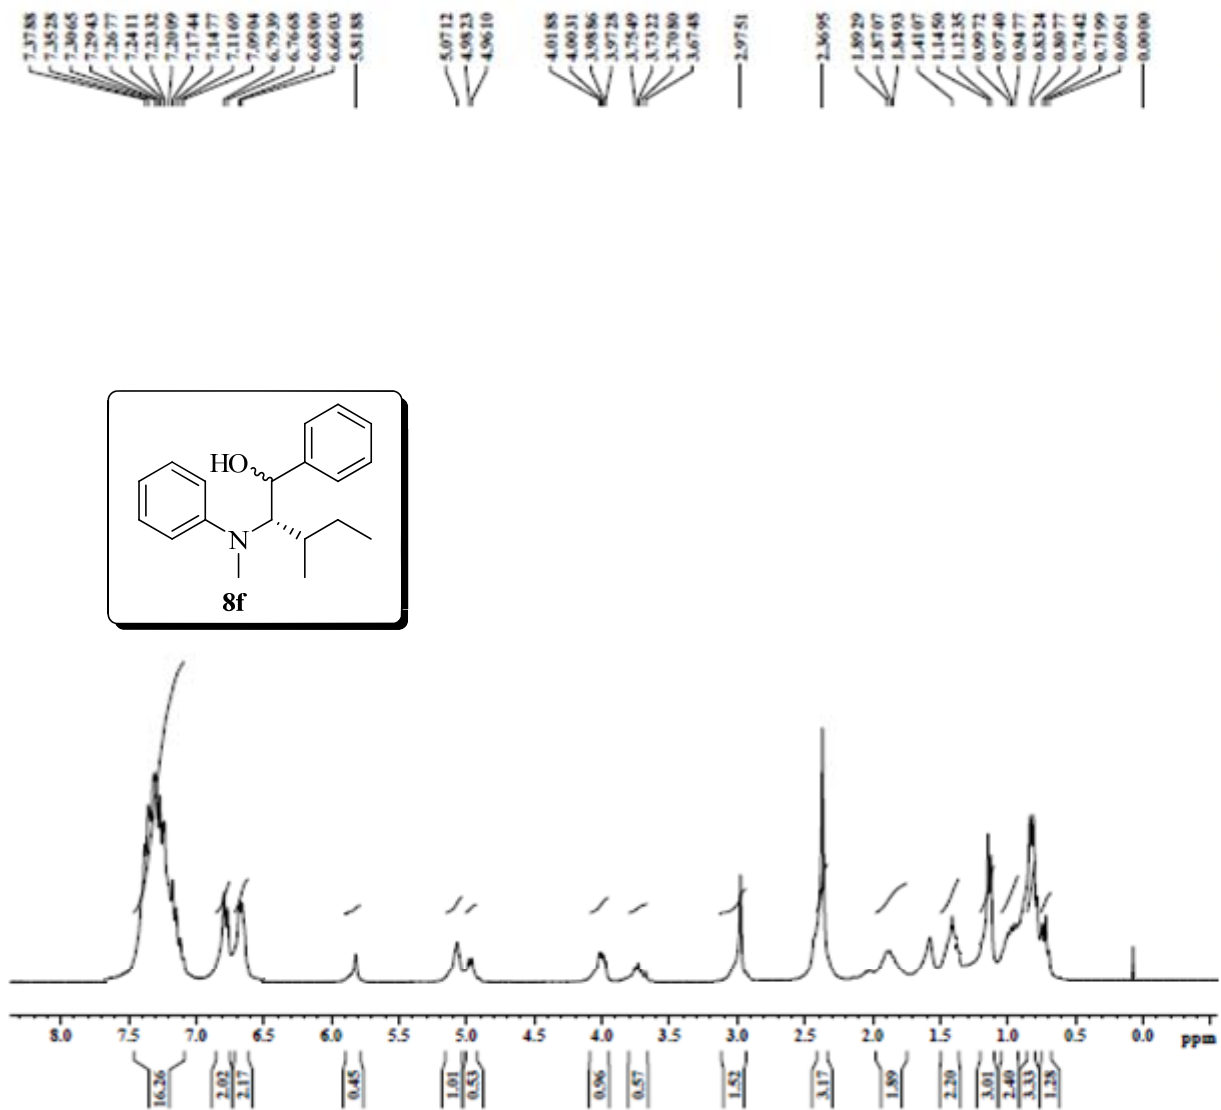

SKM-424  
1H, CDC13

```

Current Data Parameters
NAME SKM-424, 1H, 300 MHz, 31.7.12.M
EXPNO 390
PROCNO 1

F2 - Acquisition Parameters
Date_ 20120731
Time 22.29
INSTRUM spect
PROBHD 5 mm QNP 1H13
PULPROG zg30
TD 65536
SOLVENT CDCl3
NS 8
DS 0
SWH 6108.119 Hz
FIDRES 0.094423 Hz
AQ 8.2953587 sec
RG 64
DW 80.800 usec
DE 8.00 usec
TE 303.0 K
D1 1.00000000 sec
TD0 1

***** CHANNEL f1 *****
NUC1 1H
P1 11.80 usec
PL1 -1.00 dB
SFO1 300.1318534 MHz

F2 - Processing parameters
SI 32768
SF 300.1300150 MHz
WDW EM
SSB 0
LB 0.30 Hz
GB 0
PC 1.00

```

Figure 35: <sup>1</sup>H -NMR Spectrum of **8f**.

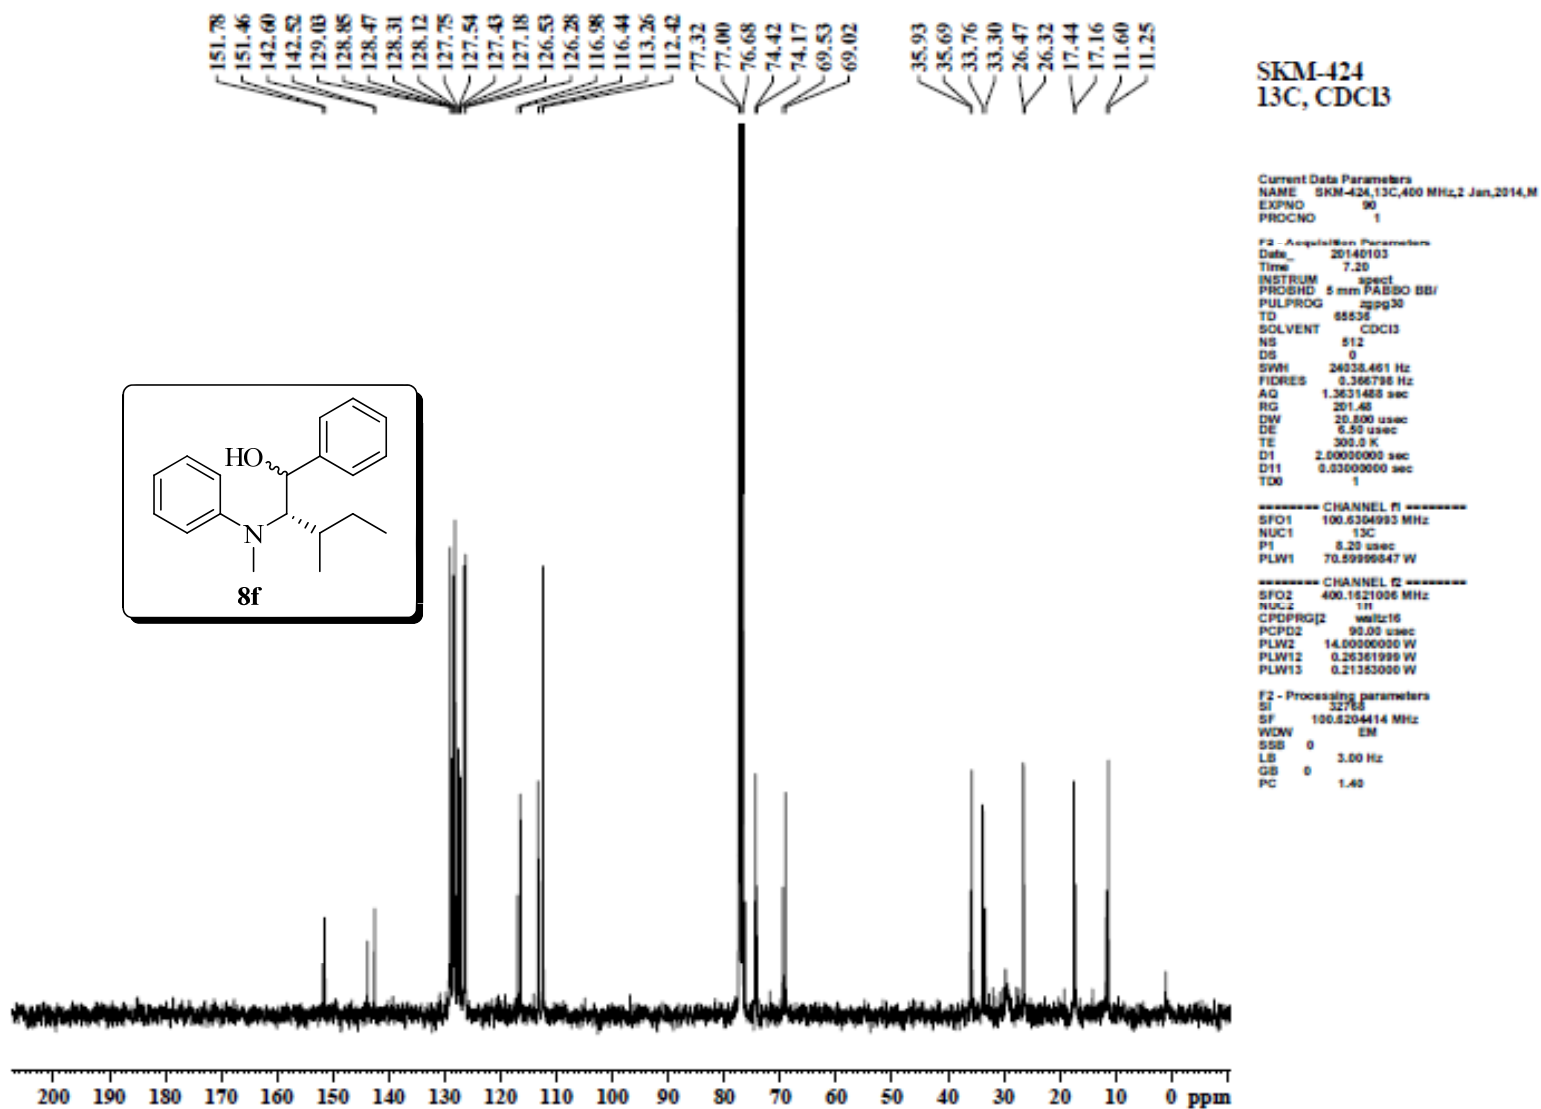

**Figure 36:** <sup>13</sup>C -NMR Spectrum of **8f**.



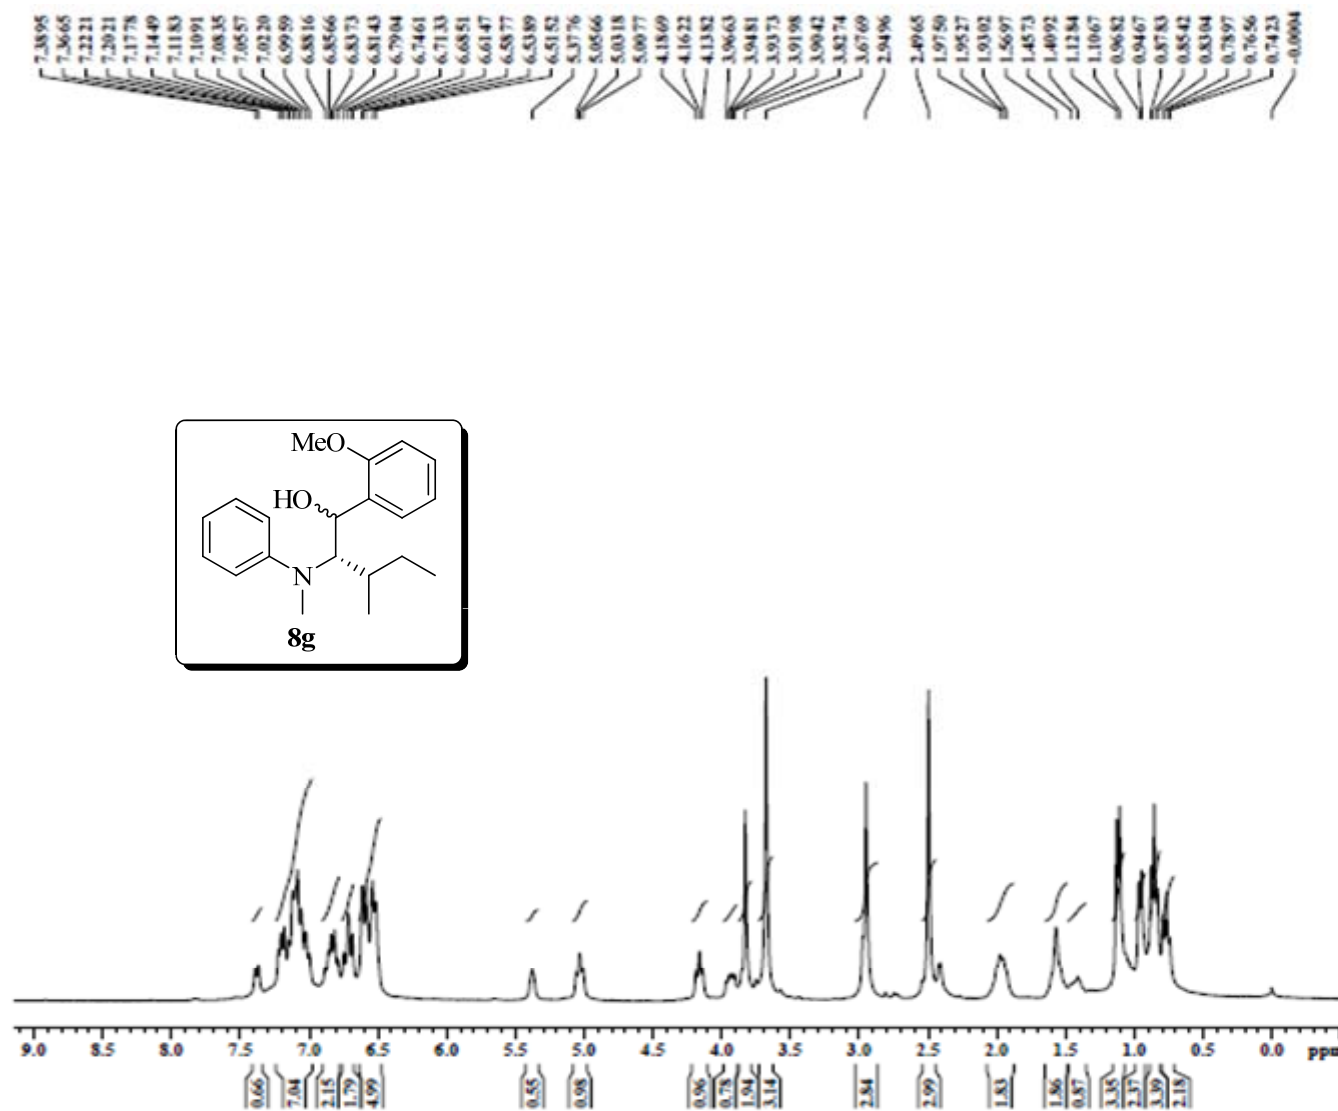

SKM-423  
1H, CDCl3

Current Data Parameters  
NAME SKM-423.1H.300 MHz.31.8.12.M  
EXPNO 380  
PROCNO 1

F2 - Acquisition Parameters  
Date\_ 20120731  
Time 22.23  
INSTRUM spect  
PROBHD 5 mm QNP 1H/13  
PULPROG zg30  
TD 65536  
SOLVENT CDCl3  
NS 8  
DS 0  
SWH 6188.119 Hz  
FIDRES 0.094423 Hz  
AQ 5.2953587 sec  
RG 57  
DW 80.800 usec  
DE 0.10 usec  
TE 303.0 K  
D1 1.00000000 sec  
TD0 1

===== CHANNEL f1 =====  
NUC1 1H  
P1 11.80 usec  
PL1 -1.00 dB  
SFO1 300.1318534 MHz

F2 - Processing parameters  
SI 32768  
SF 300.1300180 MHz  
WDW EM  
SSB 0  
LB 0.30 Hz  
GB 0  
PC 1.00

Figure 37: <sup>1</sup>H -NMR Spectrum of **8g**.

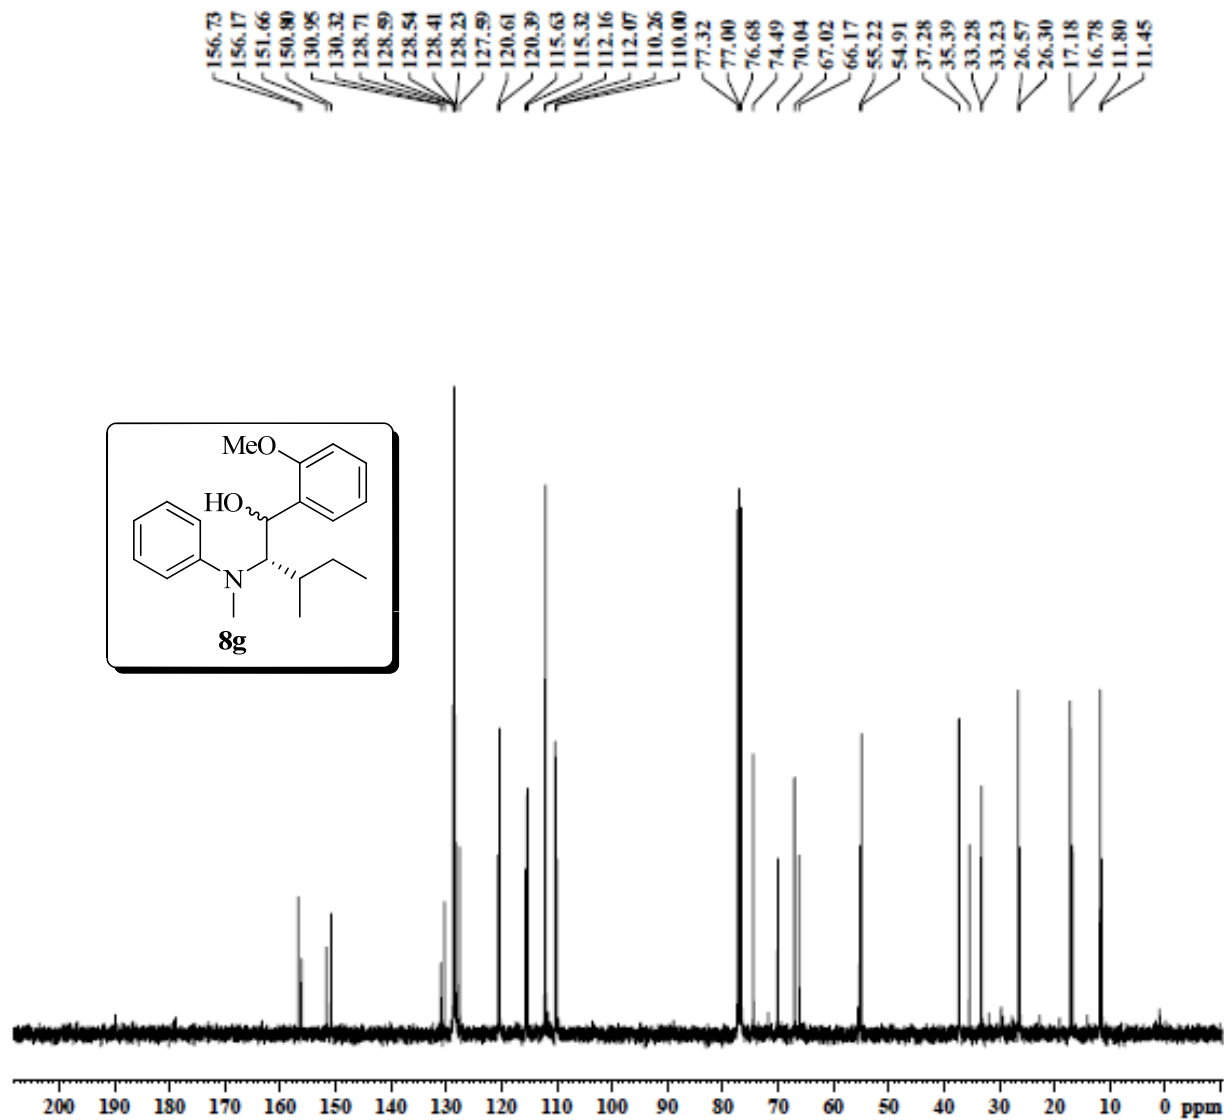

SKM-423  
 $^{13}\text{C}$ ,  $\text{CDCl}_3$

Current Data Parameters  
 NAME SKM-423,  $^{13}\text{C}$ , 400 MHz, 2 Jan, 2014, E  
 EXPNO 40  
 PROCNO 1

F2 - Acquisition Parameters  
 Date\_ 20140104  
 Time 0.40  
 INSTRUM spect  
 PROBHD 5 mm FASBO BBI  
 PULPROG zgpg30  
 TD 65536  
 SOLVENT  $\text{CDCl}_3$   
 NS 512  
 DS 4  
 SWH 24038.461 Hz  
 FIDRES 0.366796 Hz  
 AQ 1.3631488 sec  
 RG 201.48  
 DW 20.800 usec  
 DC 0.00 usec  
 TE 300.0 K  
 D1 2.00000000 sec  
 D11 0.03000000 sec  
 TDS 1

----- CHANNEL f1 -----  
 SFO1 100.6204433 MHz  
 NUC1  $^{13}\text{C}$   
 P1 8.20 usec  
 PLW1 70.50693647 W

----- CHANNEL f2 -----  
 SFO2 400.1621006 MHz  
 NUC2  $^1\text{H}$   
 CPDPRG2 waltz16  
 PCPD2 90.00 usec  
 PLW2 14.00000000 W  
 PLW12 0.26301999 W  
 PLW13 0.21353000 W

F2 - Processing parameters  
 SI 32768  
 SF 100.6204433 MHz  
 WDW EM  
 SSB 0  
 LB 1.00 Hz  
 GB 0  
 PC 1.40

Figure 38:  $^{13}\text{C}$ -NMR Spectrum of **8g**.

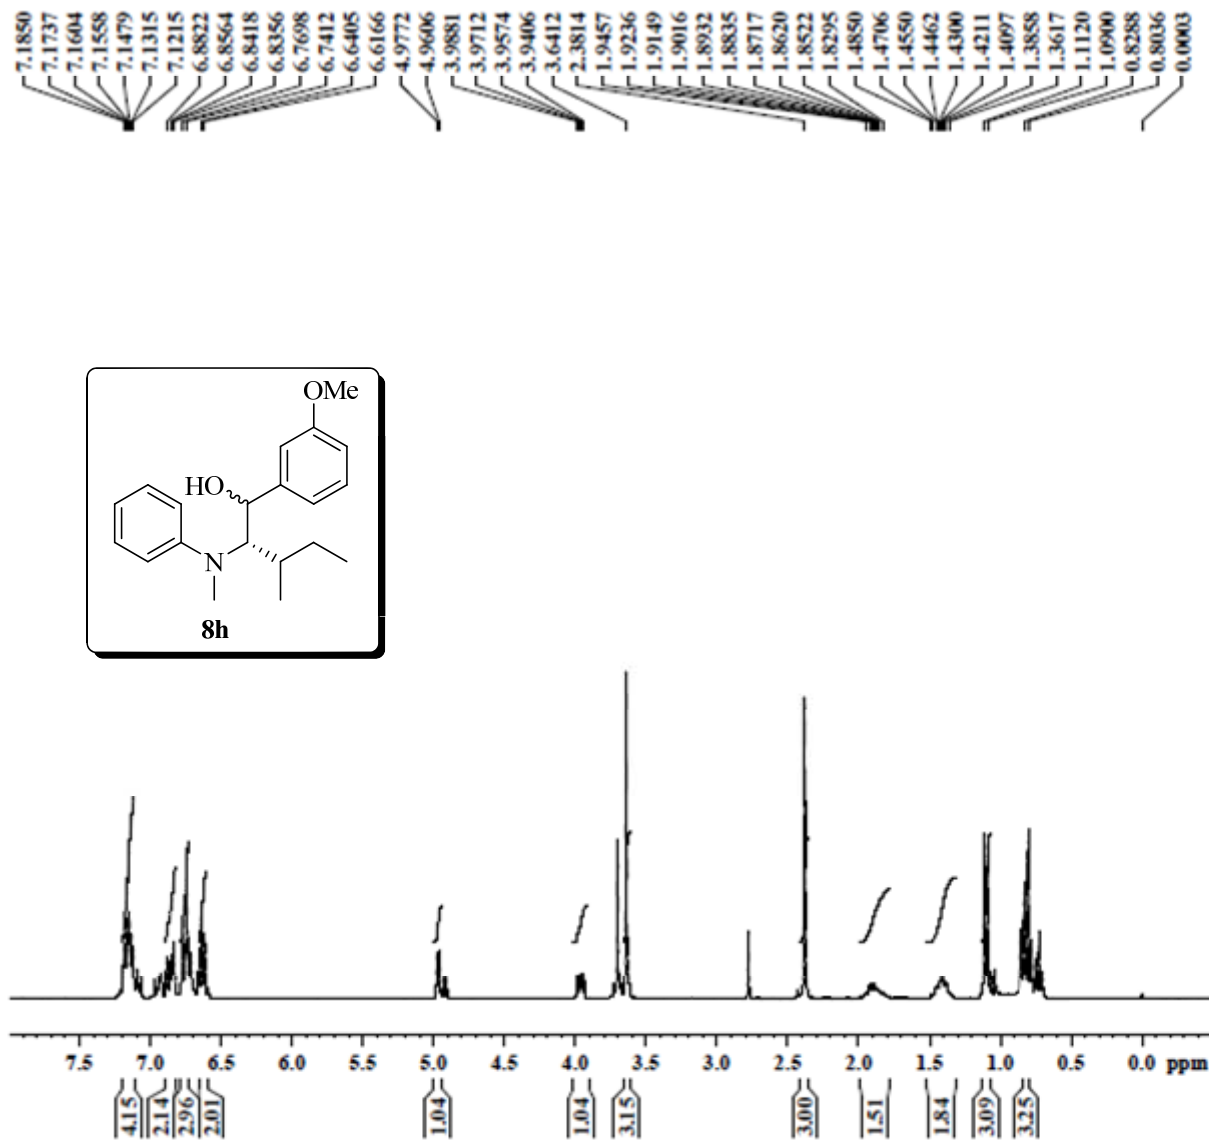

SKM-439  
1H, CDC13

Current Data Parameters  
NAME SKM-439.1H.300 MHz.30.8.12.1  
EXPNO 360  
PROCNO 1

F2 - Acquisition Parameters  
Date\_ 20120830  
Time 13.09  
INSTRUM spect  
PROBHD 5 mm QNP 1H/13  
PULPROG zg30  
TD 65536  
SOLVENT CDC13  
NS 8  
DS 8  
SWH 6188.119 Hz  
FIDRES 0.094423 Hz  
AQ 5.2983987 sec  
RG 25.4  
DW 80.800 usec  
DE 18.00 usec  
TE 300.2 K  
D1 1.00000000 sec  
TD0 1

----- CHANNEL f1 -----  
NUC1 1H  
P1 10.00 usec  
PL1 -1.00 dB  
PL1W 15.82081871 W  
SFO1 300.1318534 MHz

F2 - Processing parameters  
SI 32768  
SF 300.1300370 MHz  
WDW EM  
SSB 0  
LB 0.30 Hz  
GB 0  
PC 1.00

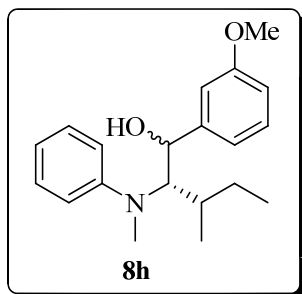

Figure 39:  $^1\text{H}$ -NMR Spectrum of **8h**.

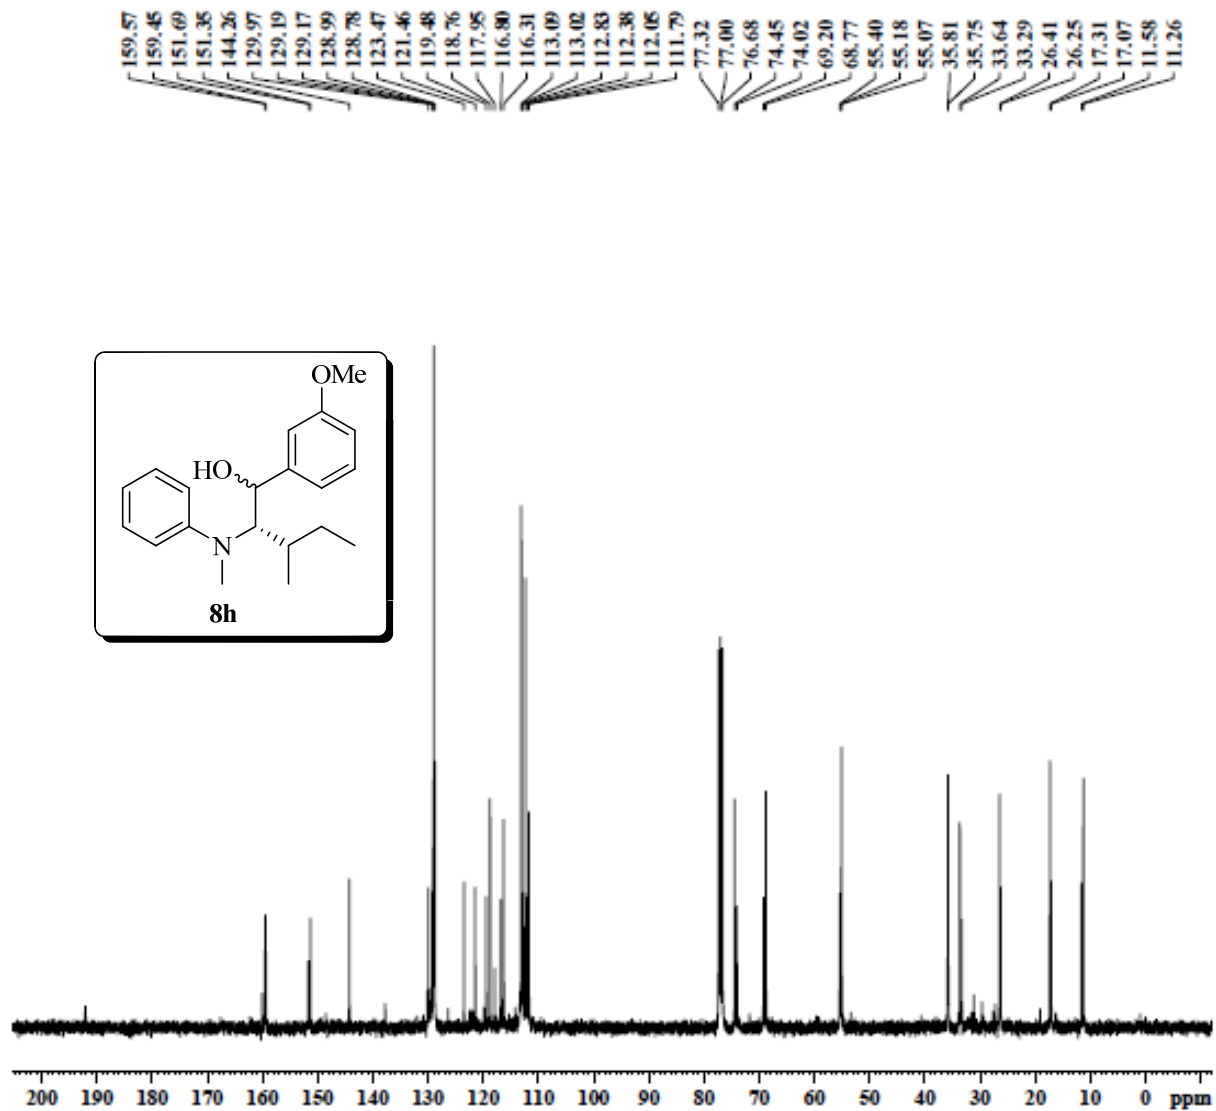

SKM-439  
13C, CDCl3

```

Current Data Parameters
NAME SKM-439, 13C, 400 MHz, 2 Jan, 2014, E
EXPNO 00
PROCNO 1

F2 - Acquisition Parameters
Date_ 20140104
Time 3.29
INSTRUM spect
PROBHD 5 mm PABBO BBI
PULPROG zgpg30
TD 65536
SOLVENT CDCl3
NS 612
DS 4
SWH1 24038.481 Hz
FIDRES 0.348738 Hz
AQ 1.3631488 sec
RG 201.48
DW 20.806 usec
DE 6.50 usec
TE 300.0 K
D11 2.00000000 sec
D12 0.00000000 sec
TD0

----- CHANNEL f1 -----
SFO1 100.6204477 MHz
NUC1 13C
P1 8.20 usec
PLW1 70.50999847 W

----- CHANNEL f2 -----
SFO2 400.1821008 MHz
NUC2 1H
CPCPRG2 waltz16
PCPD2 90.00 usec
PLW2 14.00000000 W
PLW12 0.26301988 W
PLW13 0.21353000 W

F2 - Processing parameters
SI 32768
SF 100.6204477 MHz
WDW EM
SSB 0
LB 1.00 Hz
GB 0
PC 1.40

```

Figure 40: <sup>13</sup>C -NMR Spectrum of **8h**.

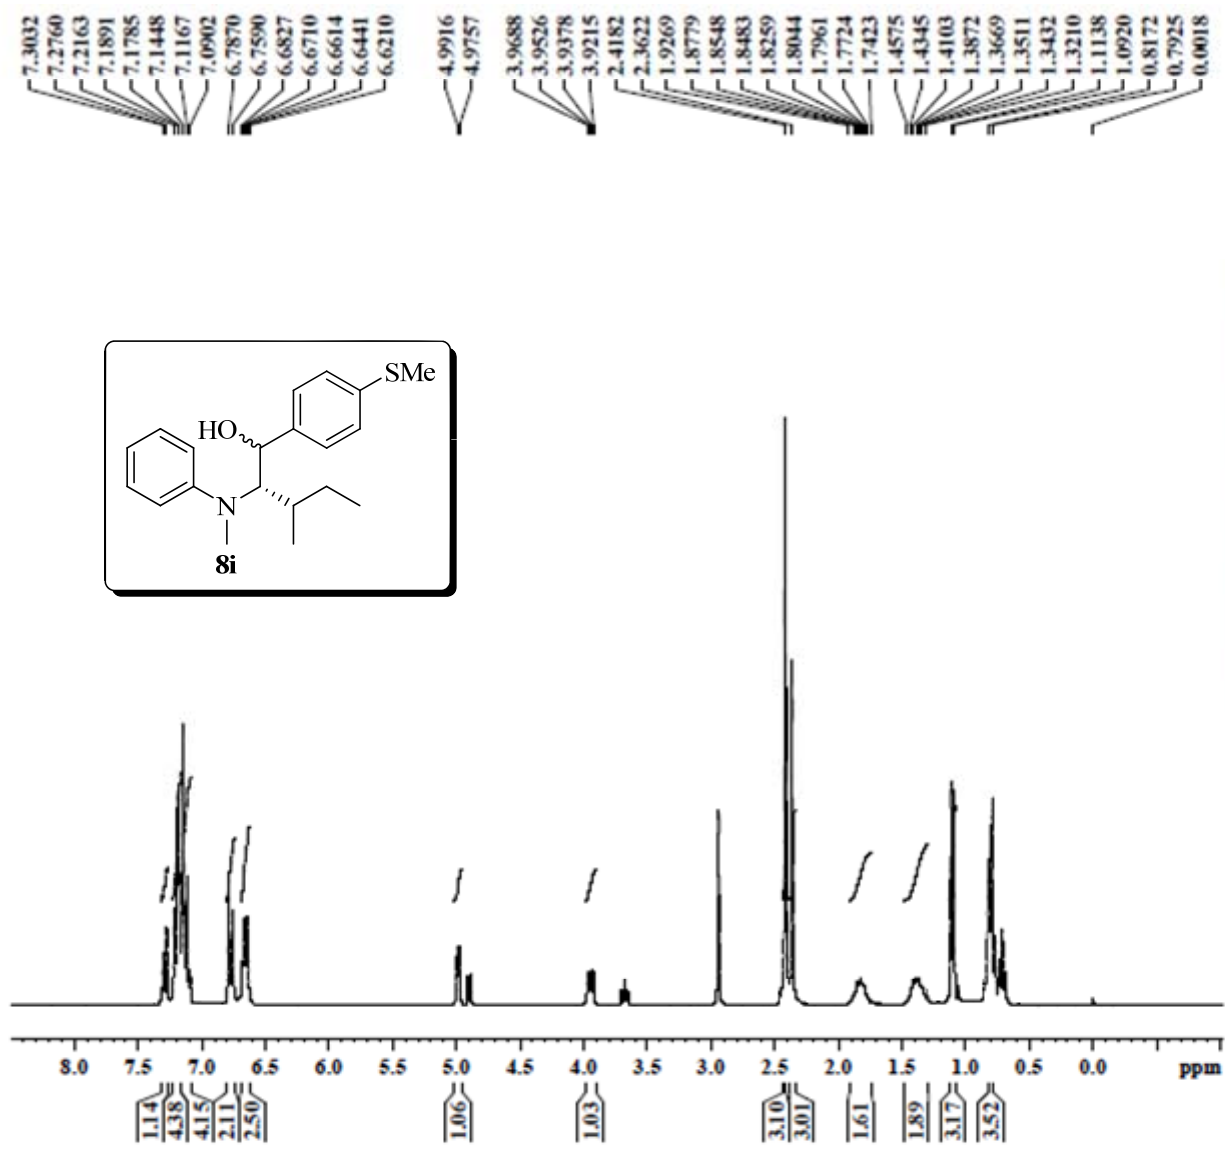

SKM-440  
1H, CDCl3

Current Data Parameters  
 NAME SKM-440, 1H, 300 MHz, 30.8.12.M  
 EXPNO 300  
 PROCNO 1

F2 - Acquisition Parameters  
 Date\_ 20120930  
 Time 13.15  
 INSTRUM spect  
 PROBHD 5 mm QNP 1H/13  
 PULPROG zg30  
 TD 65536  
 SOLVENT CDCl3  
 NS 8  
 DS 0  
 SWH 6188.119 Hz  
 FIDRES 0.094423 Hz  
 AQ 5.295387 sec  
 RG 38  
 DW 80.800 usec  
 DE 18.00 usec  
 TE 300.2 K  
 D1 1.00000000 sec  
 TDO 1

===== CHANNEL f1 =====  
 NUC1 1H  
 P1 10.00 usec  
 PL1 -1.00 dB  
 PL1W 15.52981871 W  
 SFO1 300.1318534 MHz

F2 - Processing parameters  
 SI 32768  
 SF 300.1300298 MHz  
 WDW EM  
 SSB 0  
 LB 0.30 Hz  
 GB 0  
 PC 1.00

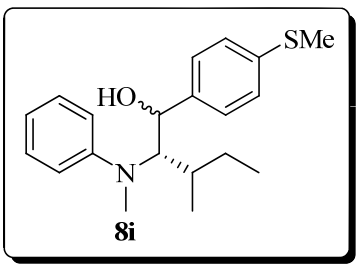

Figure 41: <sup>1</sup>H -NMR Spectrum of **8i**.

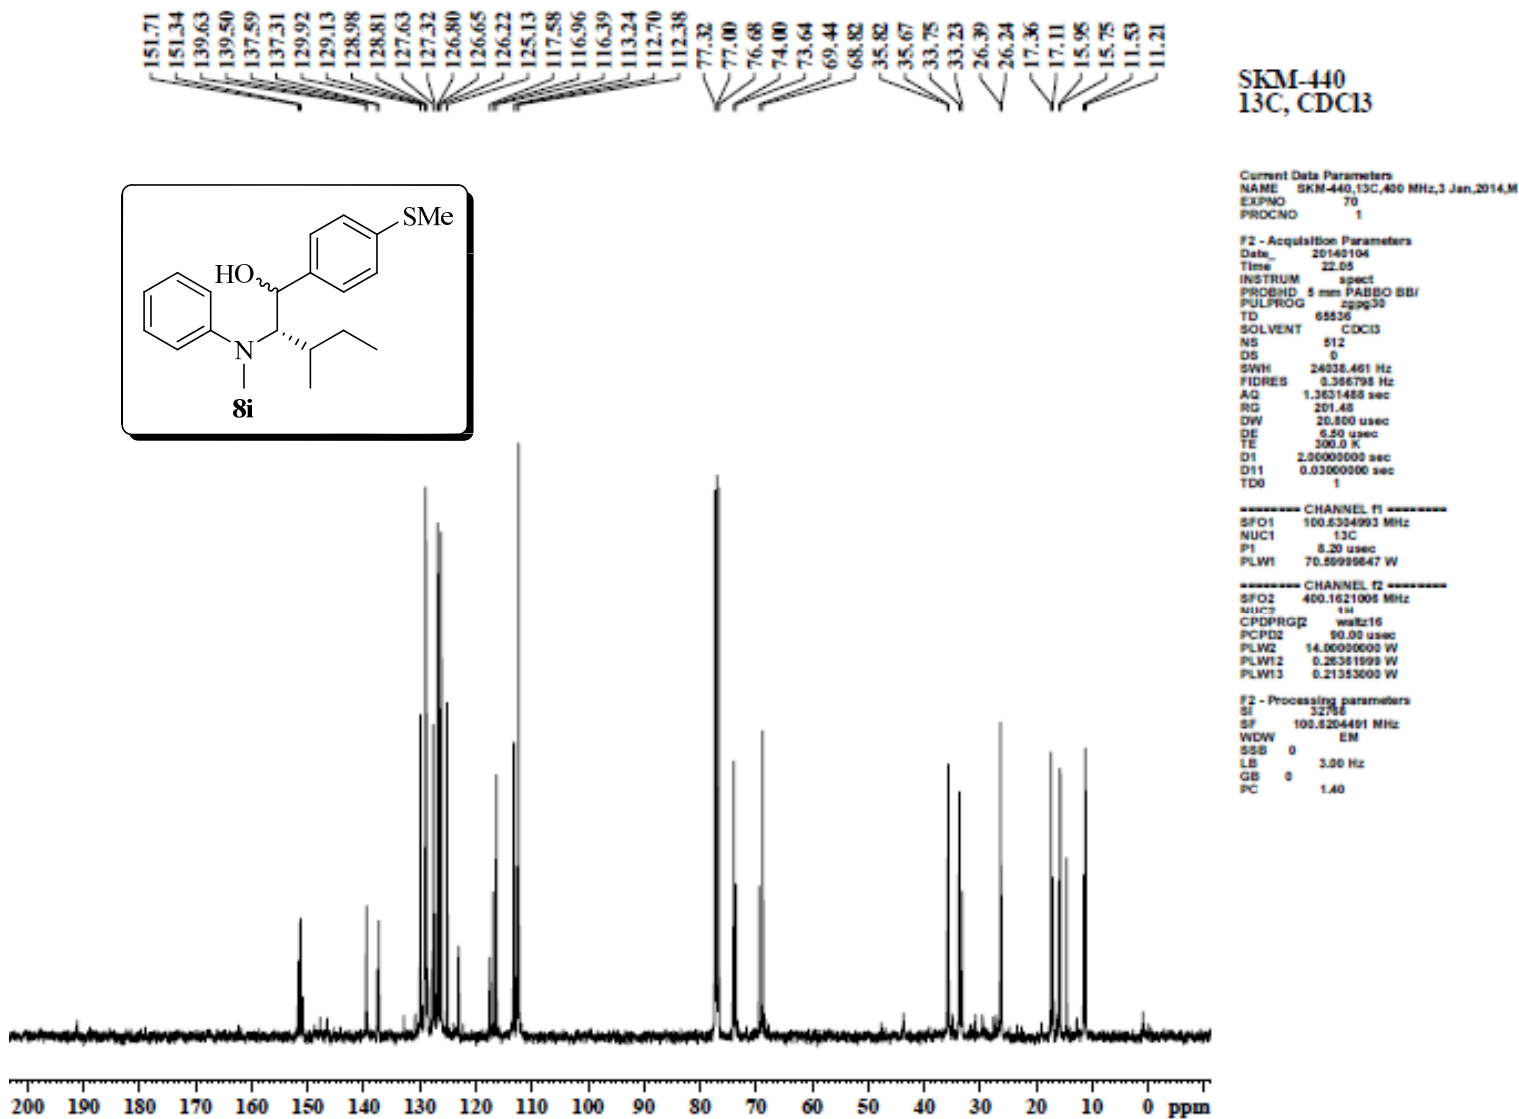

**Figure 42:**  $^{13}\text{C}$  -NMR Spectrum of **8i**.

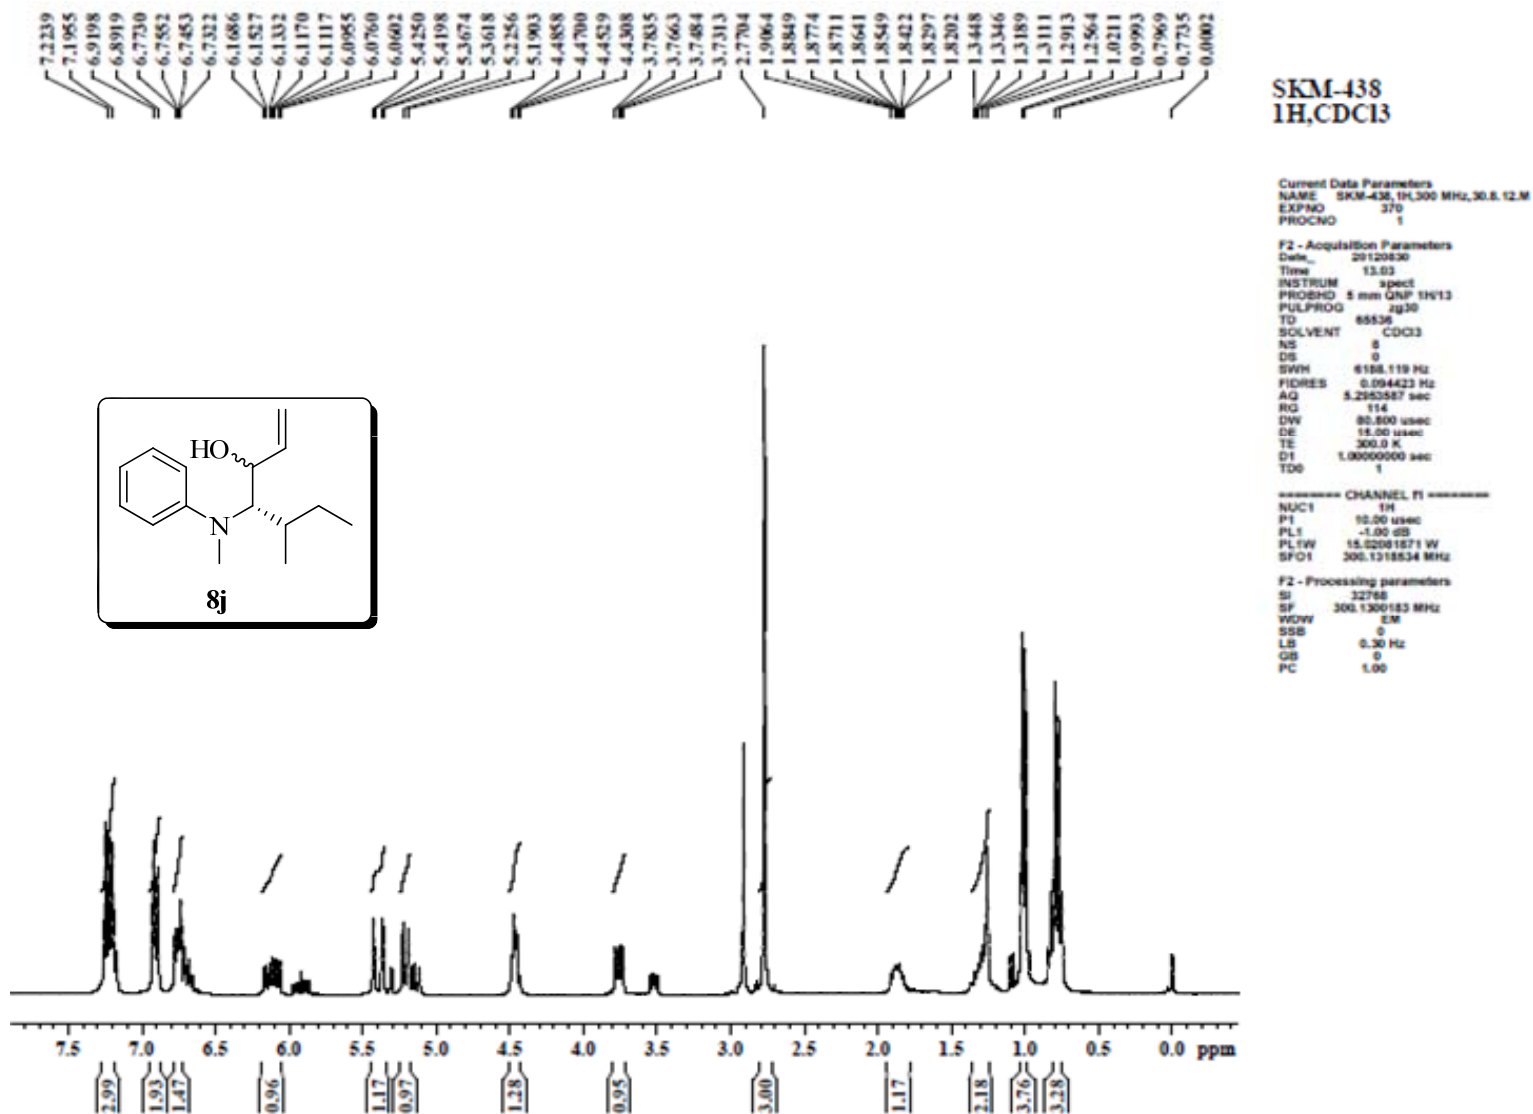

Figure 43: <sup>1</sup>H -NMR Spectrum of **8j**.

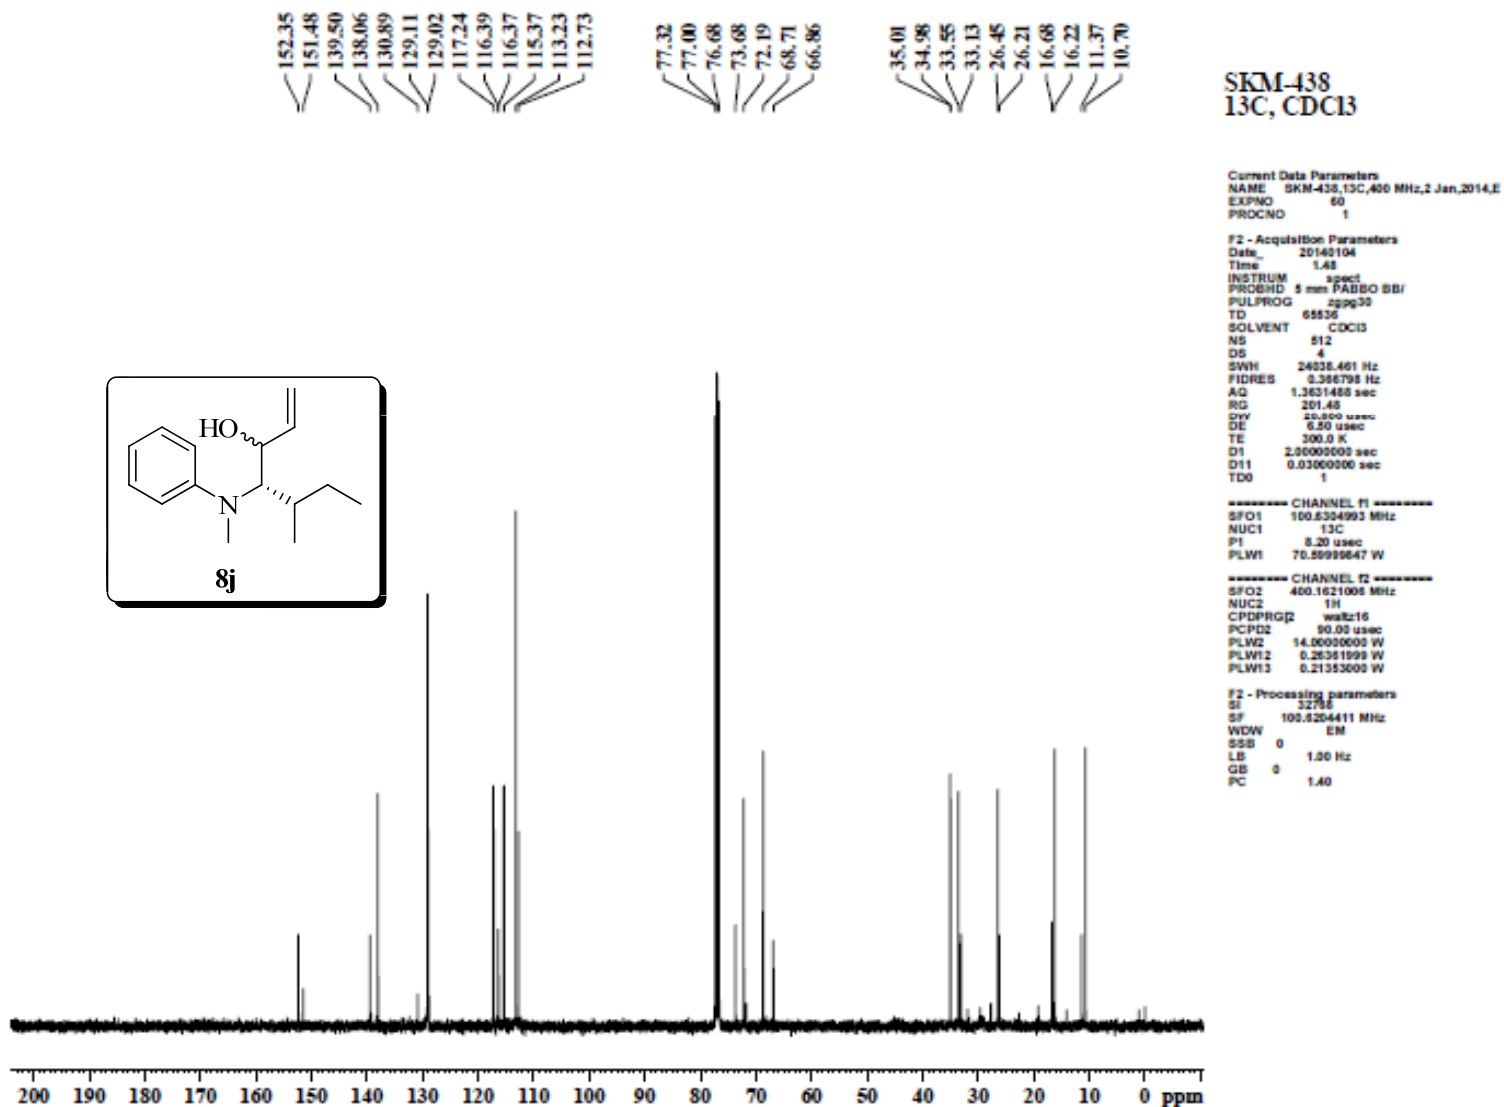

Figure 44:  $^{13}\text{C}$  -NMR Spectrum of **8j**.



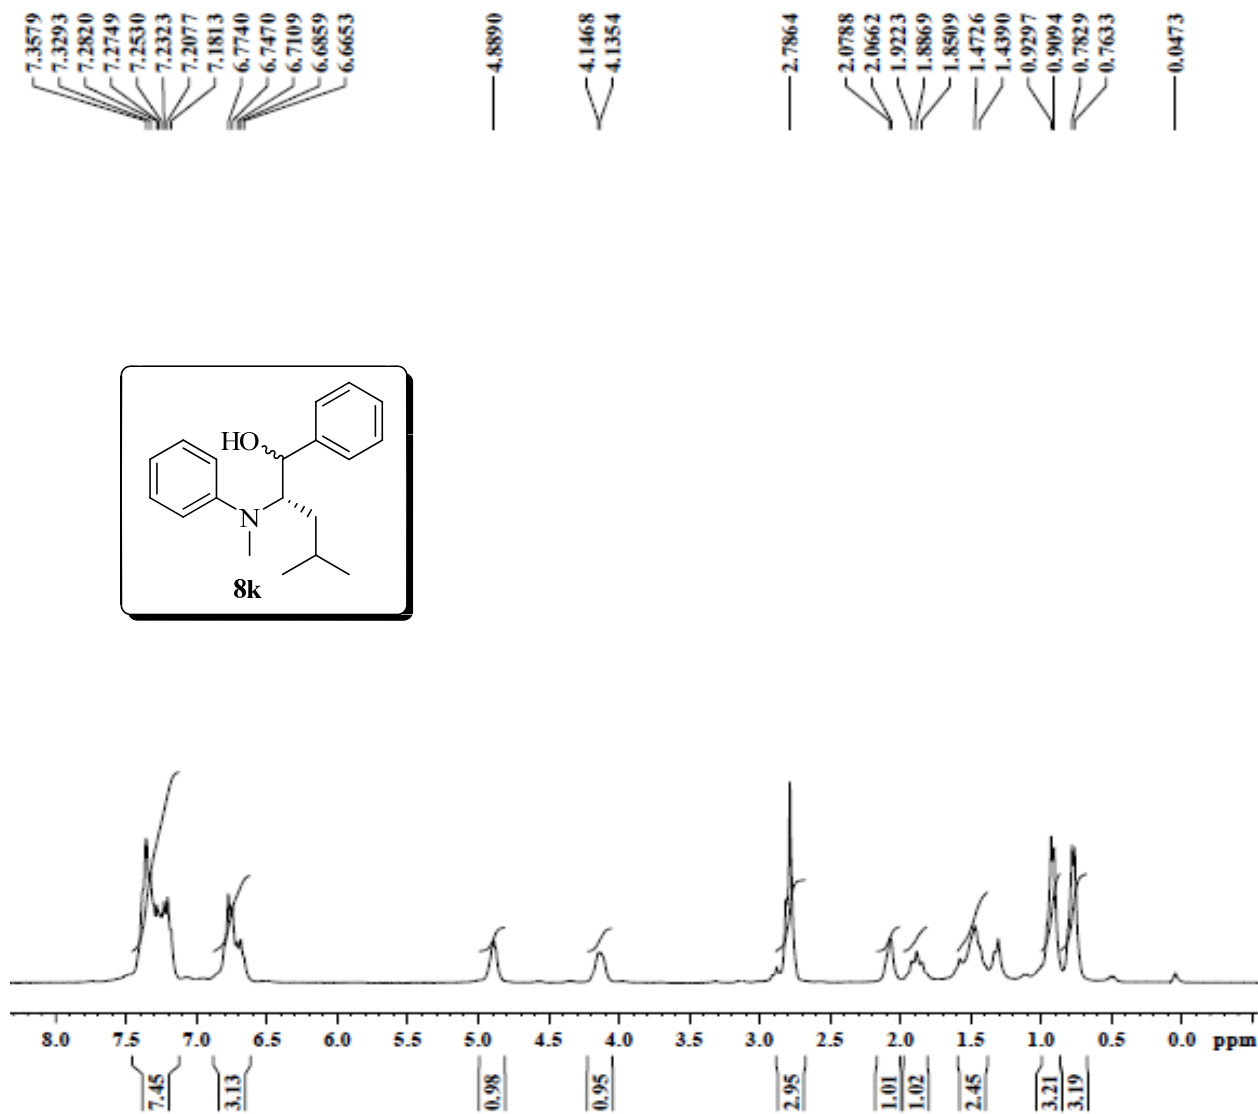

Figure 45:  $^1\text{H}$ -NMR Spectrum of **8k**.

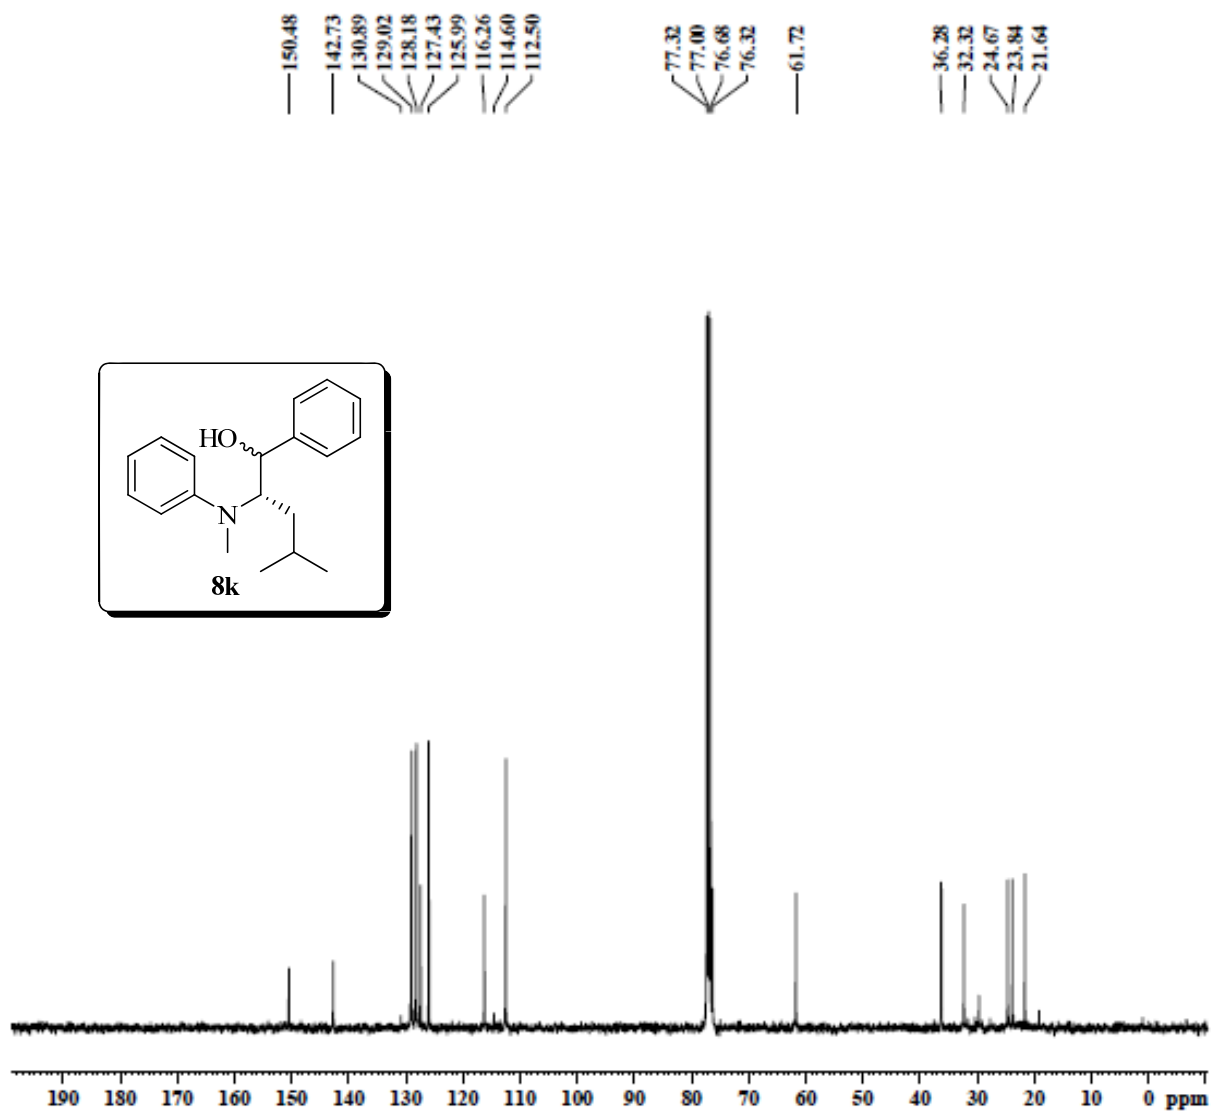

SKM-386  
13C, CDCl3

Current Data Parameters  
 NAME SKM-386\_13C\_400 MHz\_6 Jun,2014\_M  
 EXPNO 36  
 PROCNO 1

F2 - Acquisition Parameters  
 Date\_ 20140907  
 Time 0.09  
 INSTRUM spect  
 PROCNO 6 run FASBO DV  
 PULPROG zgpg30  
 TD 66636  
 SOLVENT CDCl3  
 NS 612  
 DS 0  
 SWH 24036.461 Hz  
 FIDRES 0.366736 Hz  
 AQ 1.3631488 sec  
 RG 201.68  
 DW 20.800 usec  
 DE 6.50 usec  
 TE 300.2 K  
 D1 2.0000000 sec  
 D11 0.03000000 sec  
 TD0 1

----- CHANNEL f1 -----  
 SFO1 100.6204993 MHz  
 NUC1 13C  
 P1 8.20 usec  
 PLW1 70.0000000 W

----- CHANNEL f2 -----  
 SFO2 400.1521500 MHz  
 NUC2 1H  
 CPOPRG2 waltz16  
 PCPD2 90.00 usec  
 PLW2 14.0000000 W  
 PLW12 0.26391899 W  
 PLW13 0.21353000 W

F2 - Processing parameters  
 SI 32768  
 SF 100.6204414 MHz  
 WDW EM  
 SSB 0  
 LB 3.00 Hz  
 GB 0  
 PC 1.60

Figure 46: <sup>13</sup>C -NMR Spectrum of **8k**.

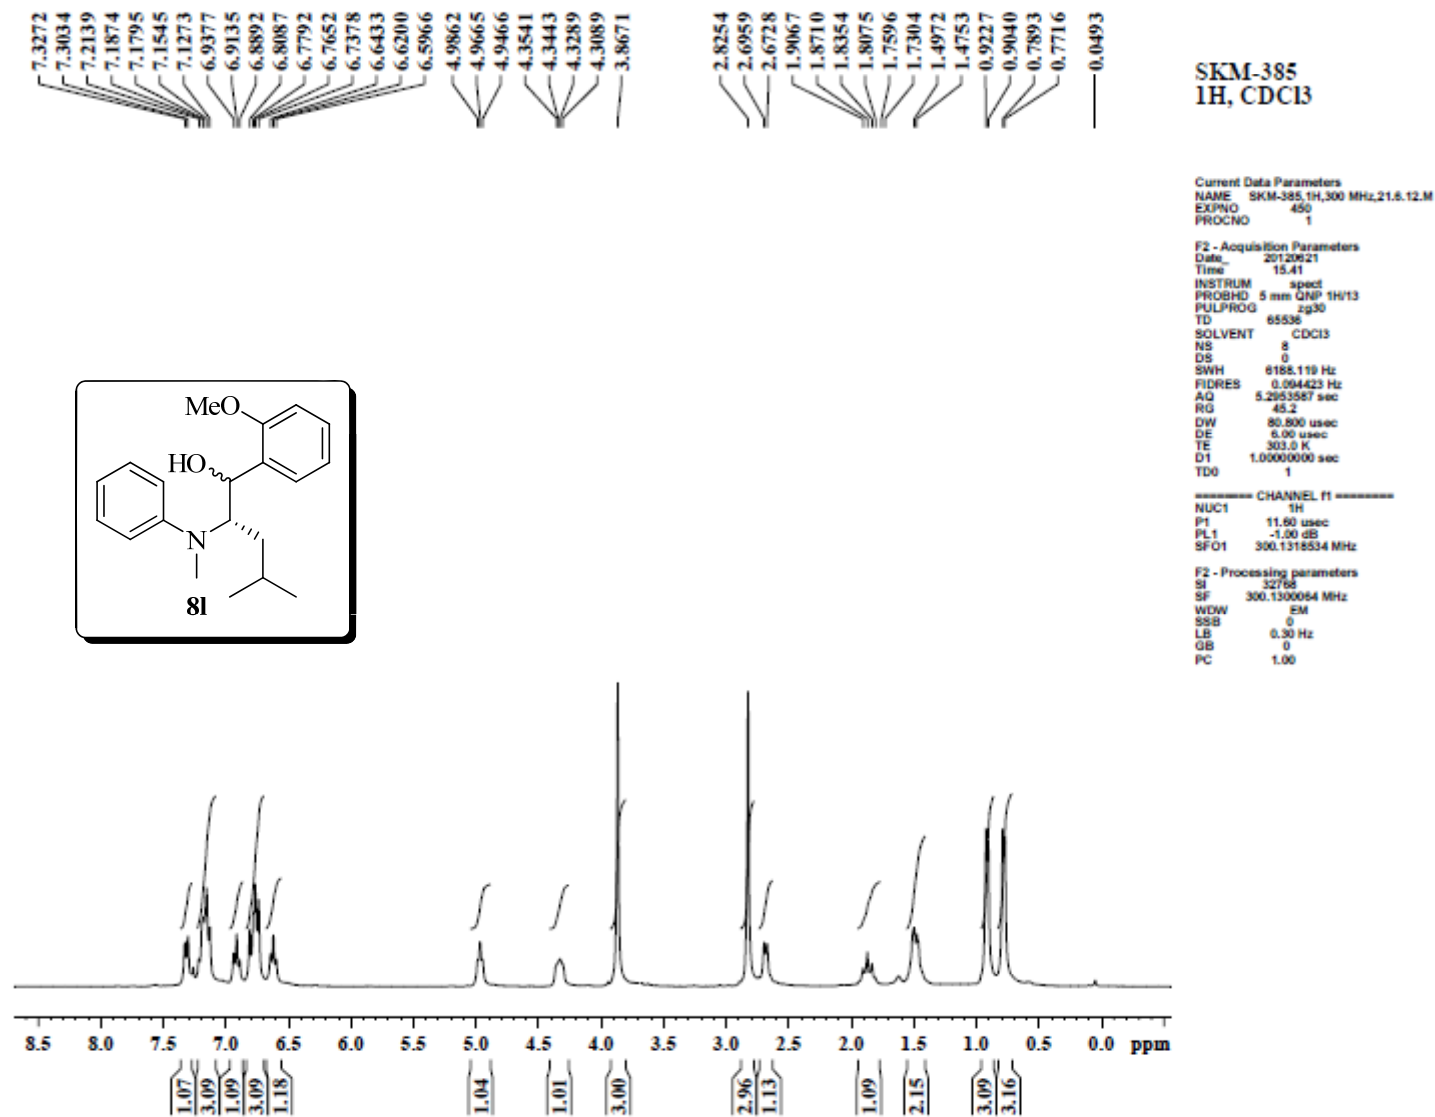

**Figure 47:** <sup>1</sup>H -NMR Spectrum of **8l**.

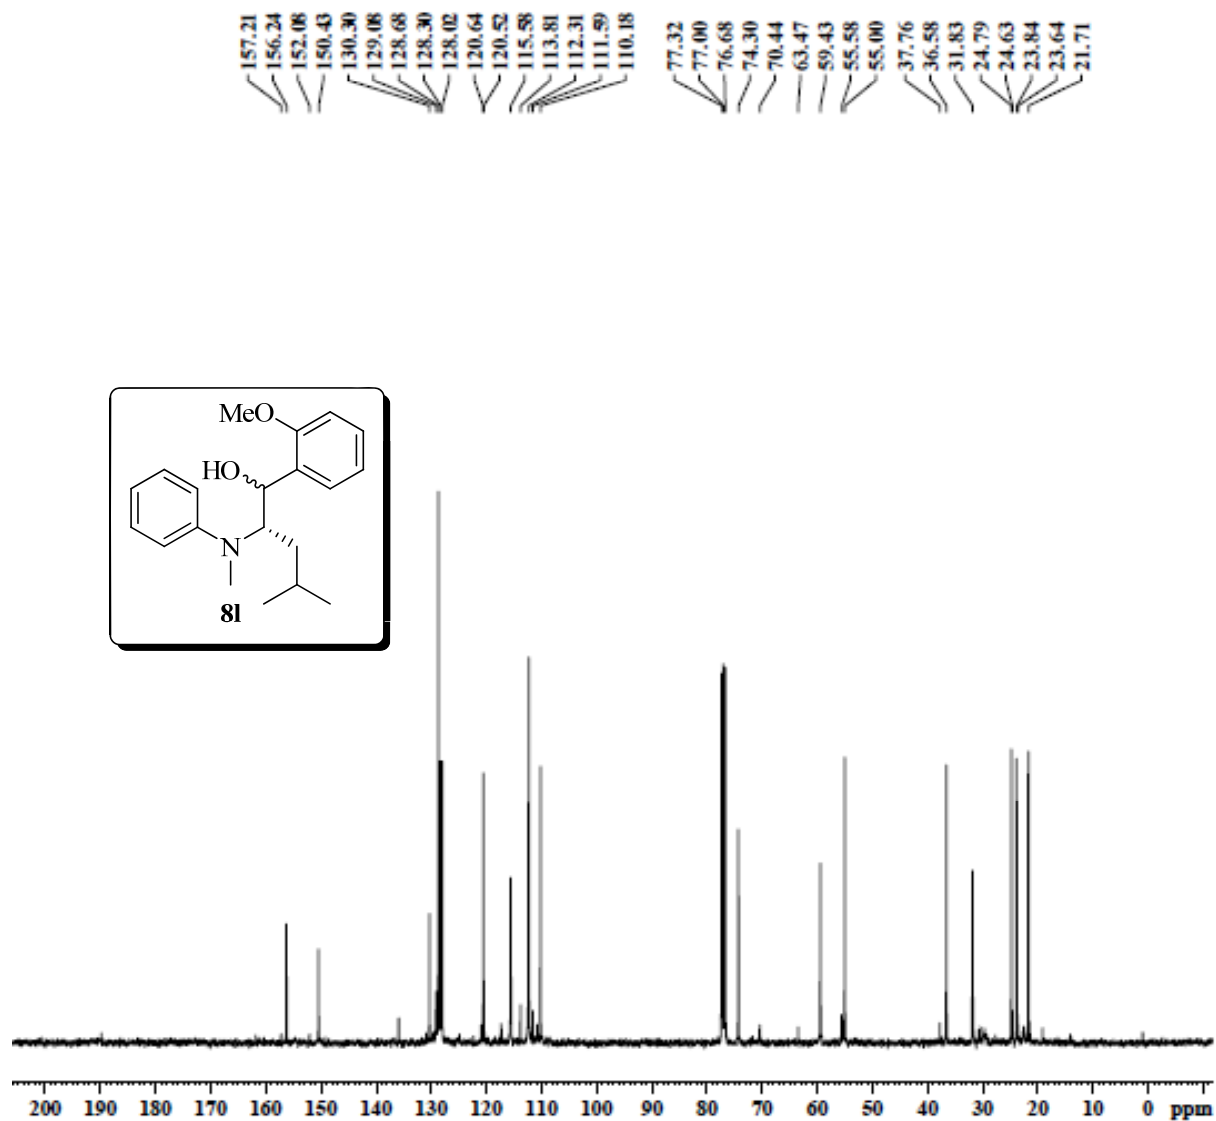

SKM-385  
13C, CDC13

Current Data Parameters  
NAME SKM-385,13C,400 MHz,2 Jan,2014,M  
EXPNO 50  
PROCNO 1

F2 - Acquisition Parameters  
Date\_ 20140103  
Time 5.07  
INSTRUM spect  
PROBHD 5 mm PABBO BB/  
PULPROG zgpg30  
TD 65536  
SOLVENT CDC13  
NS 512  
DS 0  
SWH 24038.461 Hz  
FIDRES 0.366798 Hz  
AQ 1.3631488 sec  
RG 201.48  
DW 20.800 usec  
DE 6.50 usec  
TE 300.0 K  
D1 2.00000000 sec  
D11 0.03000000 sec  
TDO 1

----- CHANNEL f1 -----  
SFO1 100.6204993 MHz  
NUC1 13C  
P1 8.20 usec  
PLW1 70.59999647 W

----- CHANNEL f2 -----  
SFO2 400.1621006 MHz  
NUC2 1H  
CPDPRG2 waltz16  
PCPD2 80.00 usec  
PLW2 14.00000000 W  
PLW12 0.26361999 W  
PLW13 0.21353000 W

F2 - Processing parameters  
SI 32768  
SF 100.6204488 MHz  
WDW EM  
SSB 0  
LB 3.00 Hz  
GB 0  
PC 1.40

Figure 48:  $^{13}\text{C}$  -NMR Spectrum of **8l**.

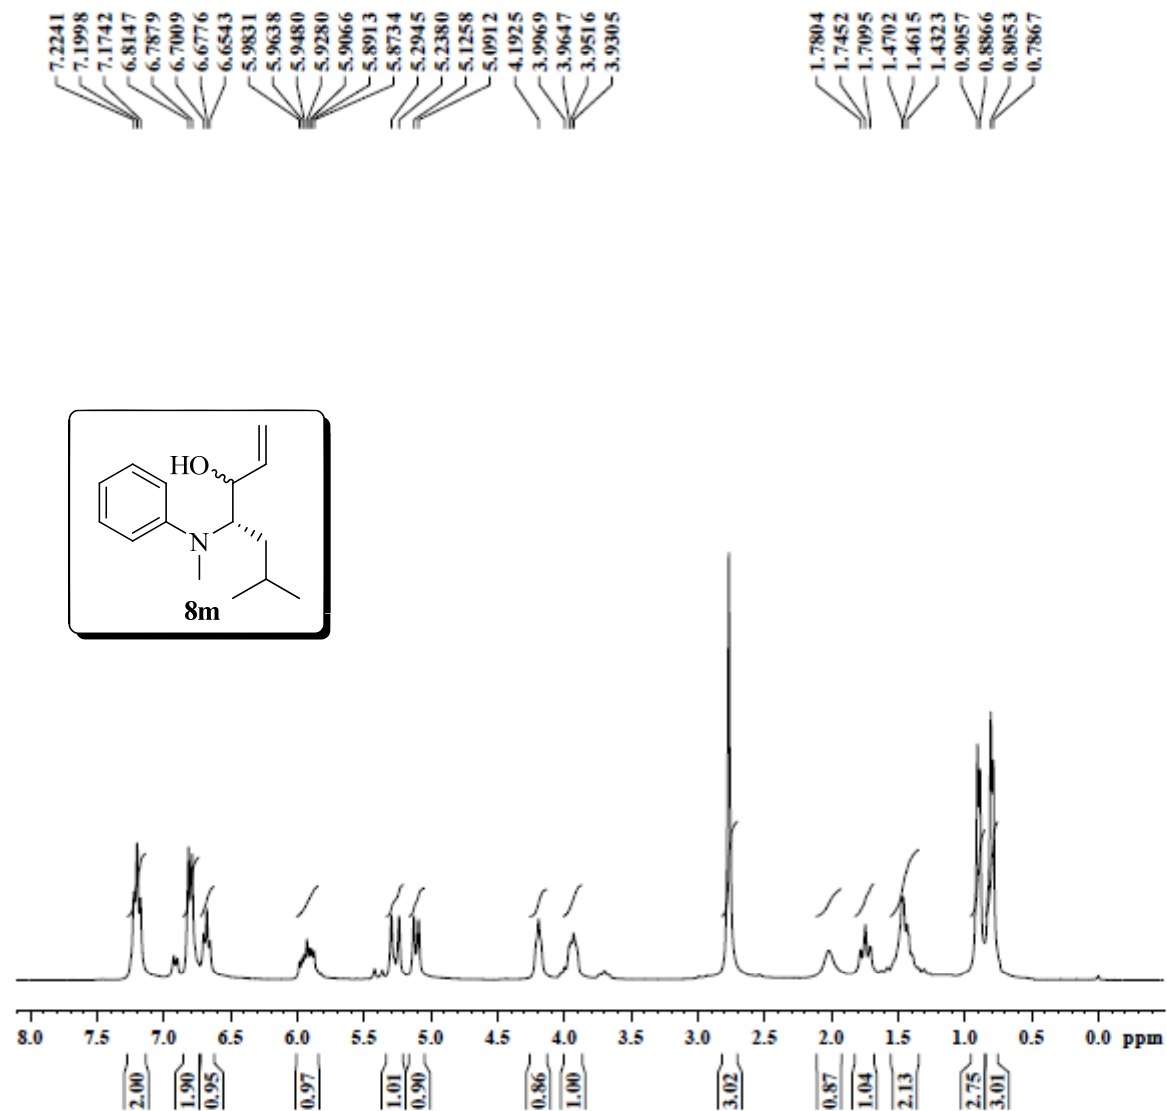

SKM-412  
1H, CDCl3

Current Data Parameters  
NAME SKM-412, 1H, 300 MHz, 16.7.12.E  
EXPNO 340  
PROCNO 1

F2 - Acquisition Parameters  
Date\_ 20120716  
Time 17.38  
INSTRUM spect  
PROBHD 5 mm QNP 1H13  
PULPROG zg30  
TD 65536  
SOLVENT CDCl3  
NS 8  
DS 0  
SWH 7211.539 Hz  
FIDRES 0.110039 Hz  
AQ 4.5438795 sec  
RG 40.3  
DW 89.333 usec  
DE 6.00 usec  
TE 303.0 K  
D1 1.00000000 sec  
TD0 1

===== CHANNEL f1 =====  
NUC1 1H  
PT 11.80 usec  
PL1 -1.00 dB  
SFO1 300.1318534 MHz

F2 - Processing parameters  
SI 32768  
SF 300.1300209 MHz  
WDW EM  
SSB 0  
LB 0.30 Hz  
GB 0  
PC 1.00

Figure 49:  $^1\text{H}$ -NMR Spectrum of **8m**.

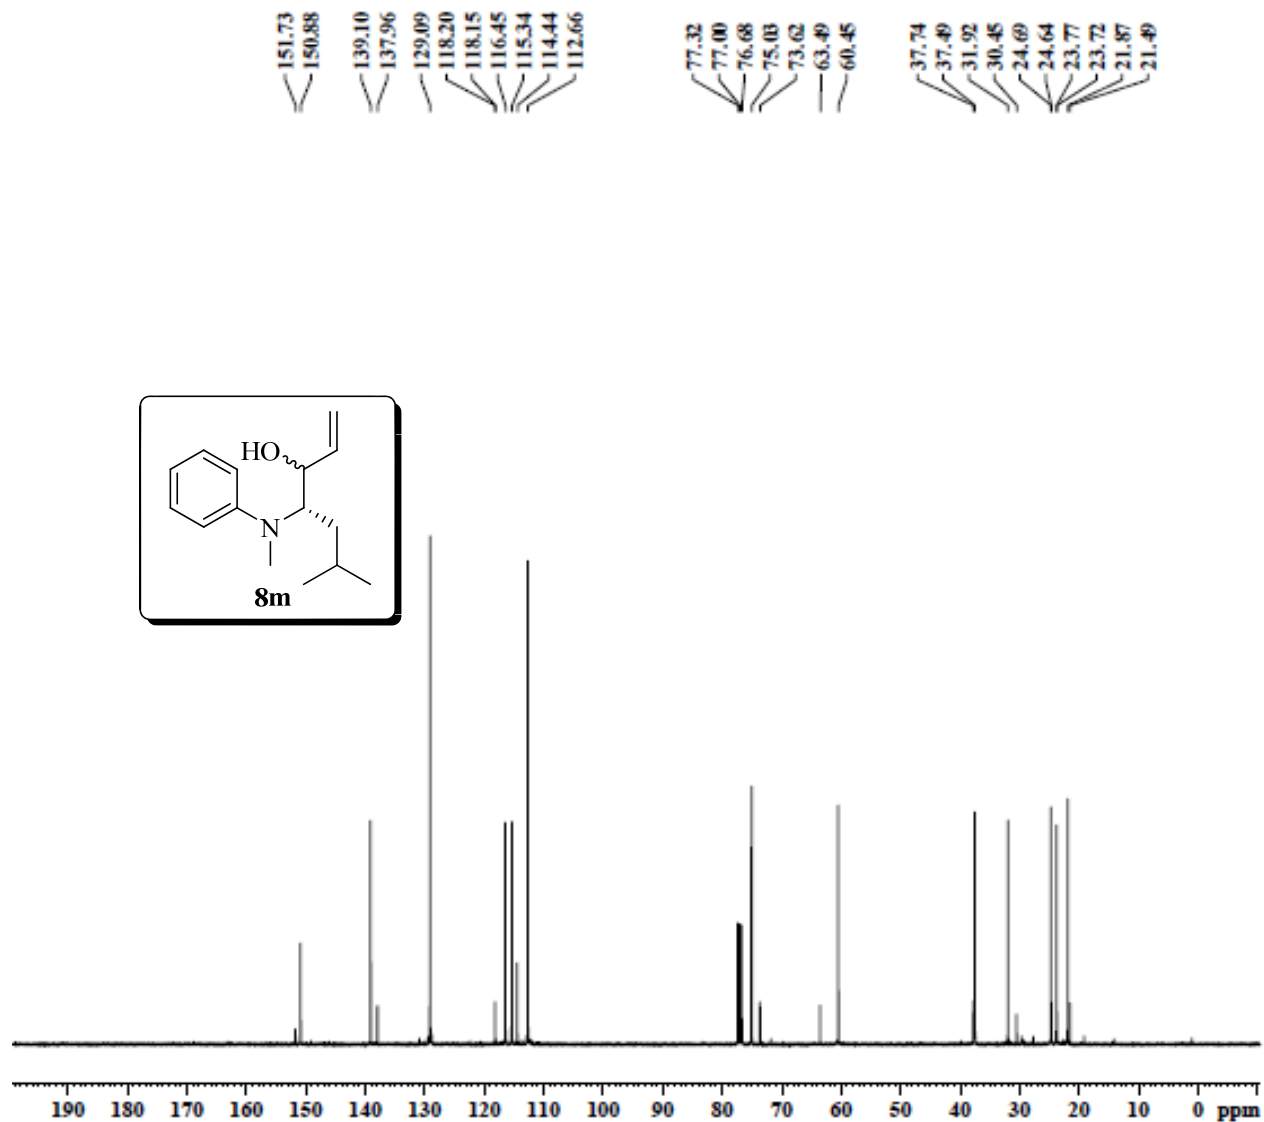

SKM-412  
13C, CDCl3

Current Data Parameters  
NAME SKM-412, 13C, 400 MHz, 2 Jan, 2014.E  
EXPNO 50  
PROCNO 1

F2 - Acquisition Parameters  
Date\_ 20140104  
Time 1.14  
INSTRUM spect  
PROBHD 5 mm F4BBO BB/  
PULPROG zgpg30  
TD 65536  
SOLVENT CDCl3  
NS 512  
DS 4  
SWH 24038.481 Hz  
FIDRES 0.366738 Hz  
AQ 1.3631488 sec  
RG 201.48  
DW 20.800 usec  
DE 6.50 usec  
TE 300.2 K  
D1 2.0000000 sec  
D11 0.0300000 sec  
TD0 1

----- CHANNEL f1 -----  
SFO1 100.6204463 MHz  
NUC1 13C  
P1 8.20 usec  
PLW1 70.59999647 W

----- CHANNEL f2 -----  
SFO2 400.1821006 MHz  
NUC2 1H  
PCPD2 waltz16  
PCPD2 90.00 usec  
PLW2 14.00000000 W  
PLW12 0.26361999 W  
PLW13 0.21353000 W

F2 - Processing parameters  
SI 32768  
SF 100.6204463 MHz  
WDW EM  
SSB 0  
LB 1.00 Hz  
GB 0  
PC 1.40

Figure 50:  $^{13}\text{C}$  -NMR Spectrum of **8m**.

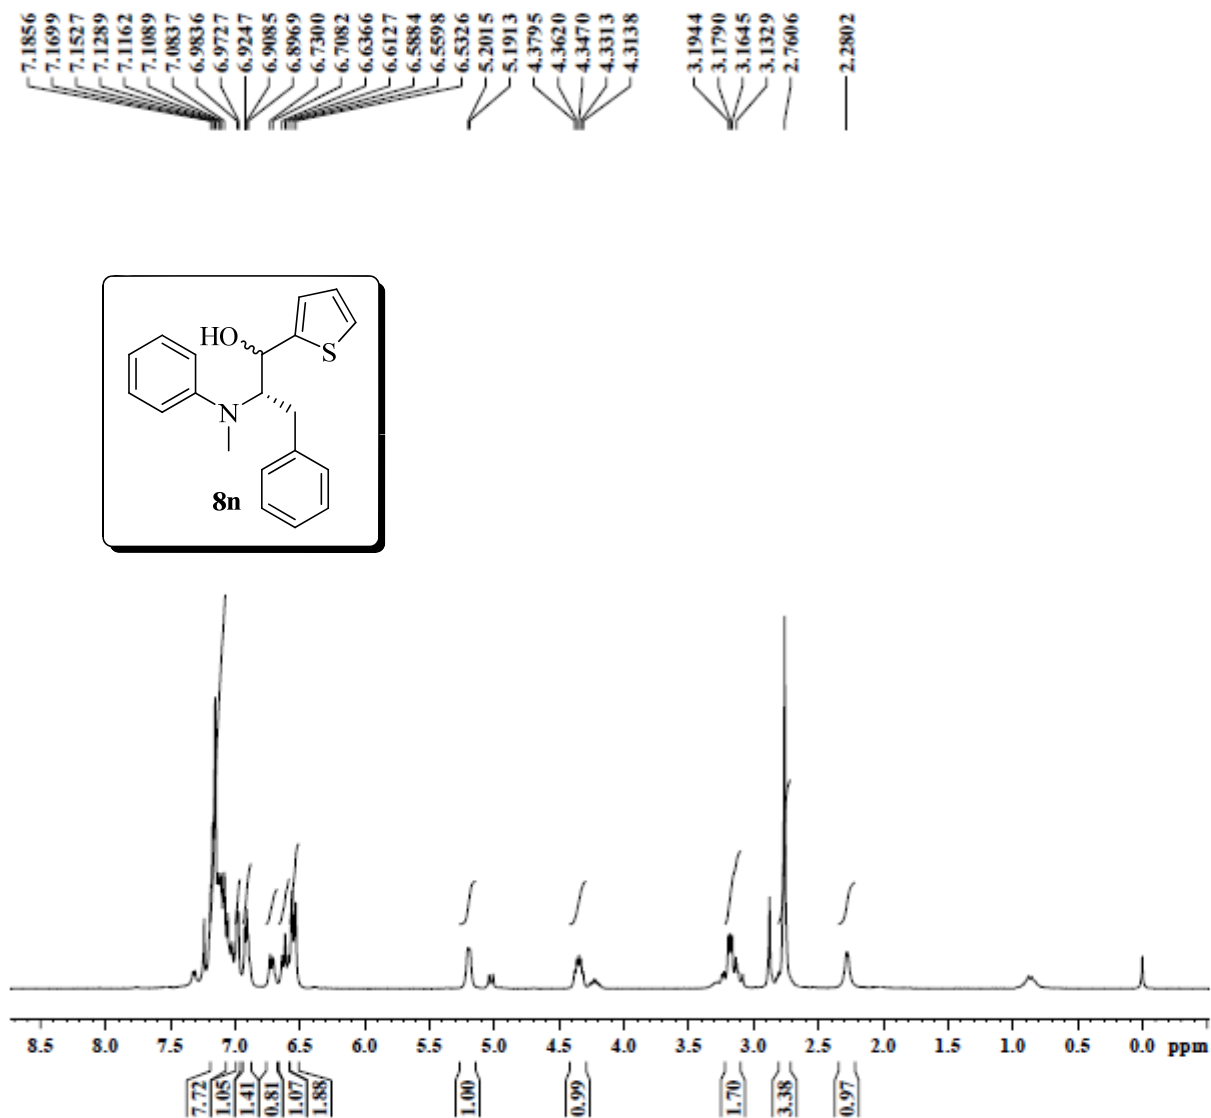

SKM-334  
1H, CDCl<sub>3</sub>

Current Data Parameters  
NAME SKM-334, 1H, 300 MHz, 28.3.12.E  
EXPNO 320  
PROCNO 1

F2 - Acquisition Parameters  
Date\_ 20120326  
Time 20.08  
INSTRUM spect  
PROBHD 5 mm QNP 1H/13  
PULPROG zg30  
TD 65536  
SOLVENT CDCl<sub>3</sub>  
NS 8  
DS 0  
SWH 6182.119 Hz  
FIDRES 0.094423 Hz  
AQ 5.2953587 sec  
RG 144  
DW 80.800 usec  
DE 6.00 usec  
TE 300.0 K  
D1 1.00000000 sec  
TD0 1

===== CHANNEL f1 =====  
NUC1 1H  
P1 11.60 usec  
PL1 -1.50 dB  
SFO1 300.1318534 MHz

F2 - Processing parameters  
SI 32768  
SF 300.1309131 MHz  
VEW EM  
SBB 0  
LB 0.30 Hz  
GB 0  
PC 1.00

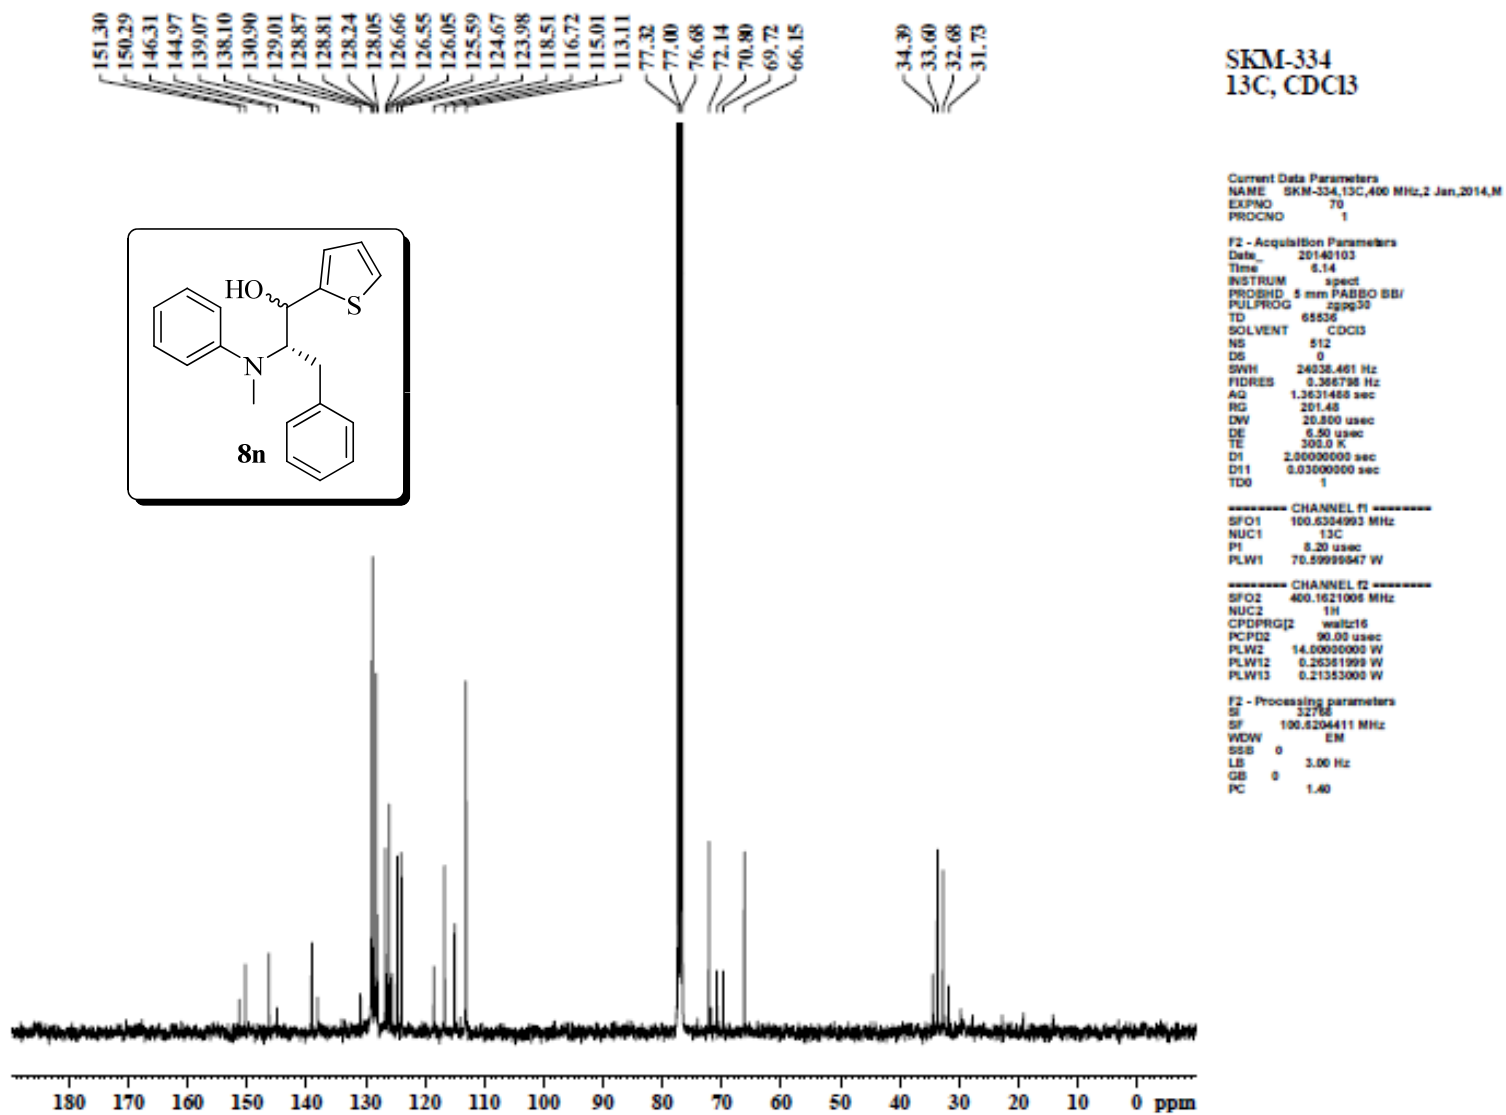

**Figure 52:**  $^{13}\text{C}$ -NMR Spectrum of **8n**.



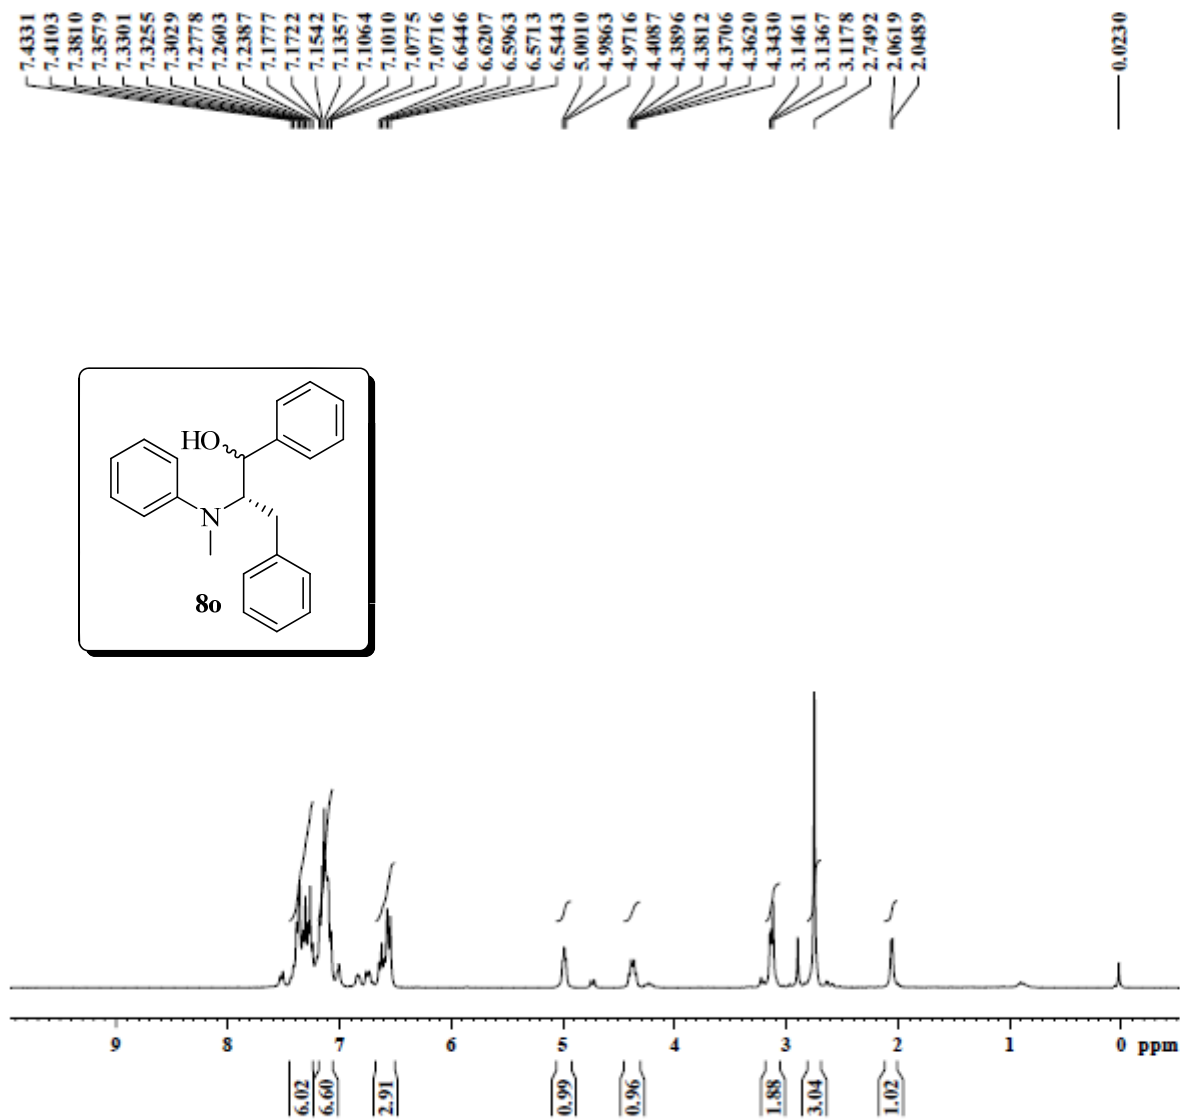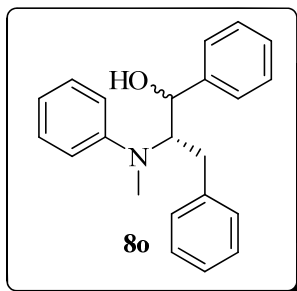

SKM-352A  
1H, CDC13

Current Data Parameters  
 NAME SKM-352A\_1H\_300 MHz\_16.4.12.M  
 EXPNO 420  
 PROCNO 1

F2 - Acquisition Parameters  
 Date\_ 20120416  
 Time 14.03  
 INSTRUM spect  
 PROBHD 5 mm QNP 1H/13  
 PULPROG zg30  
 TD 65536  
 SOLVENT CDC13  
 NS 8  
 DS 0  
 SWH 6185.119 Hz  
 FIDRES 0.094423 Hz  
 AQ 5.293587 sec  
 RG 151  
 DW 80.800 usec  
 DE 6.00 usec  
 TE 298.2 K  
 D1 1.0000000 sec  
 TDO 1

===== CHANNEL f1 =====  
 NUC1 1H  
 P1 11.60 usec  
 PL1 -1.00 dB  
 SFO1 300.1318534 MHz

F2 - Processing parameters  
 SI 32768  
 SF 300.1300087 MHz  
 WDW EM  
 SSB 0  
 LB 0.30 Hz  
 GB 0  
 PC 1.00

Figure 53: <sup>1</sup>H -NMR Spectrum of **8o**.

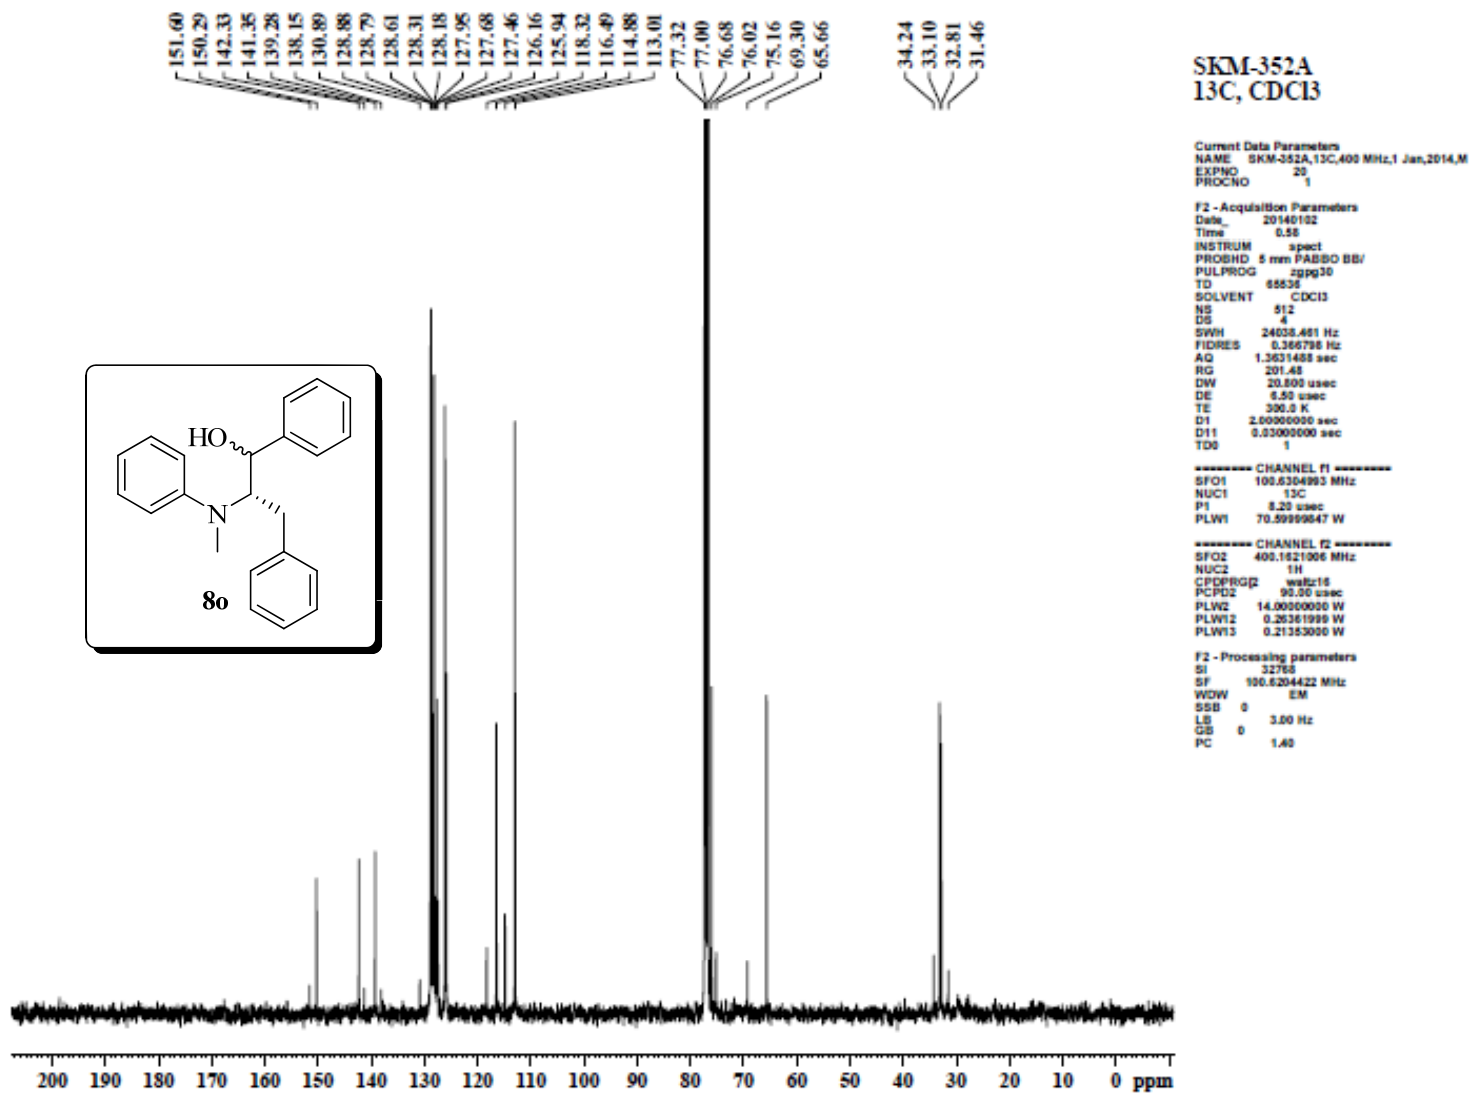

**Figure 54:** <sup>13</sup>C -NMR Spectrum of **8o**.

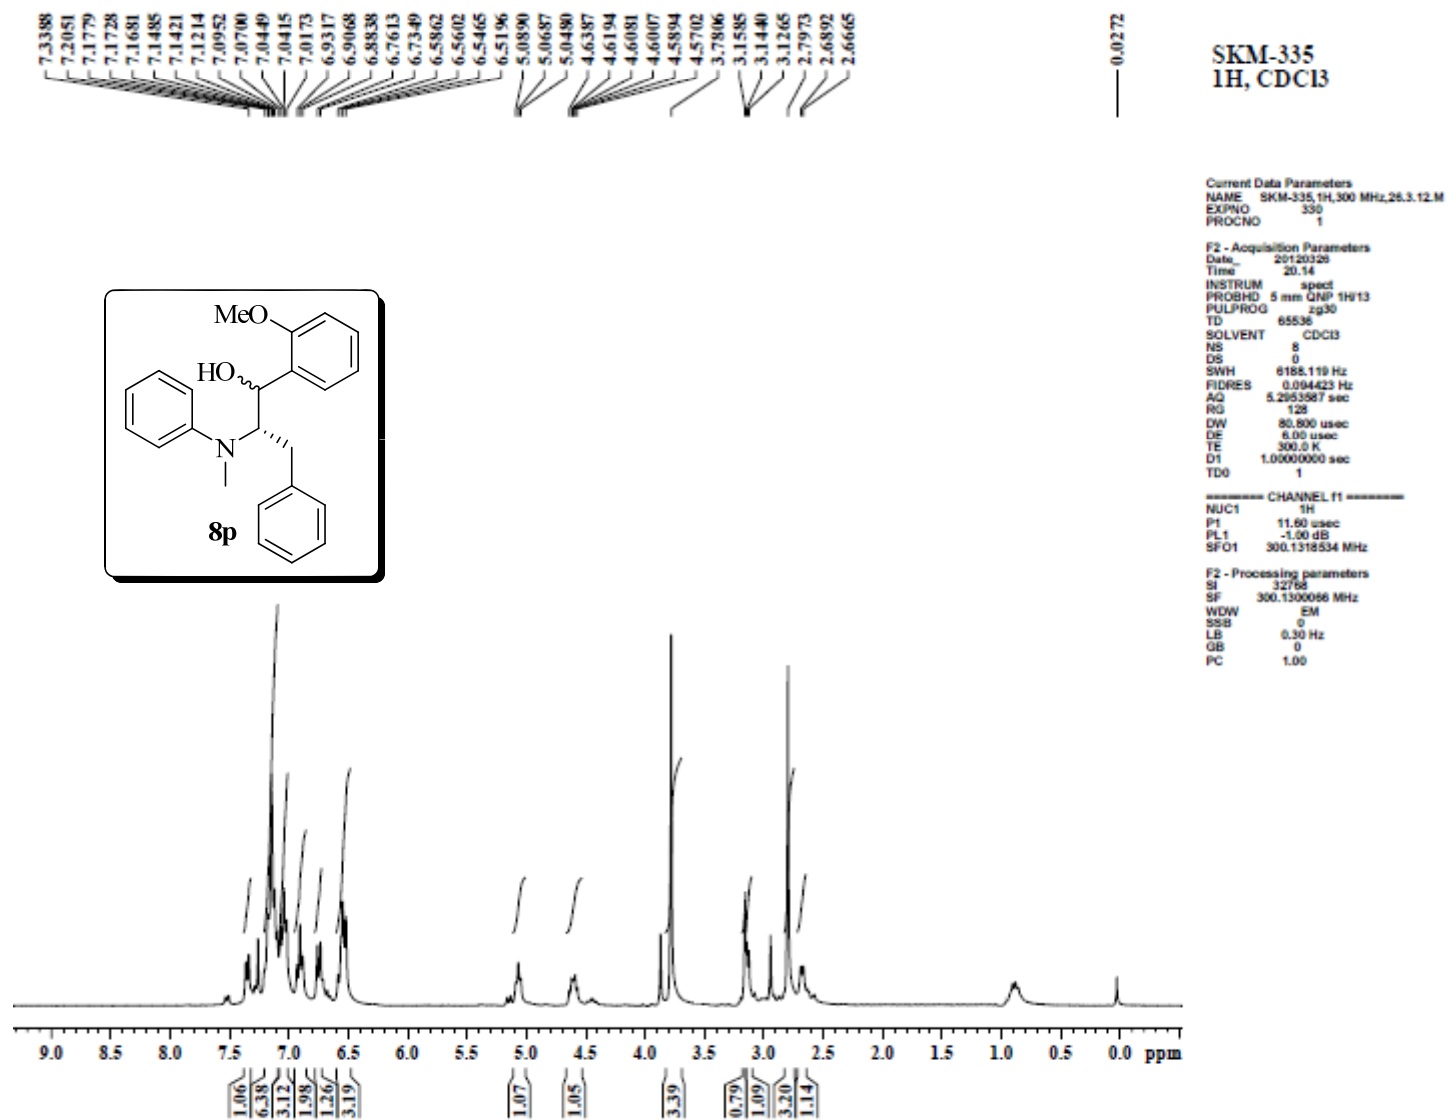

**Figure 55:**  $^1\text{H}$ -NMR Spectrum of **8p**.

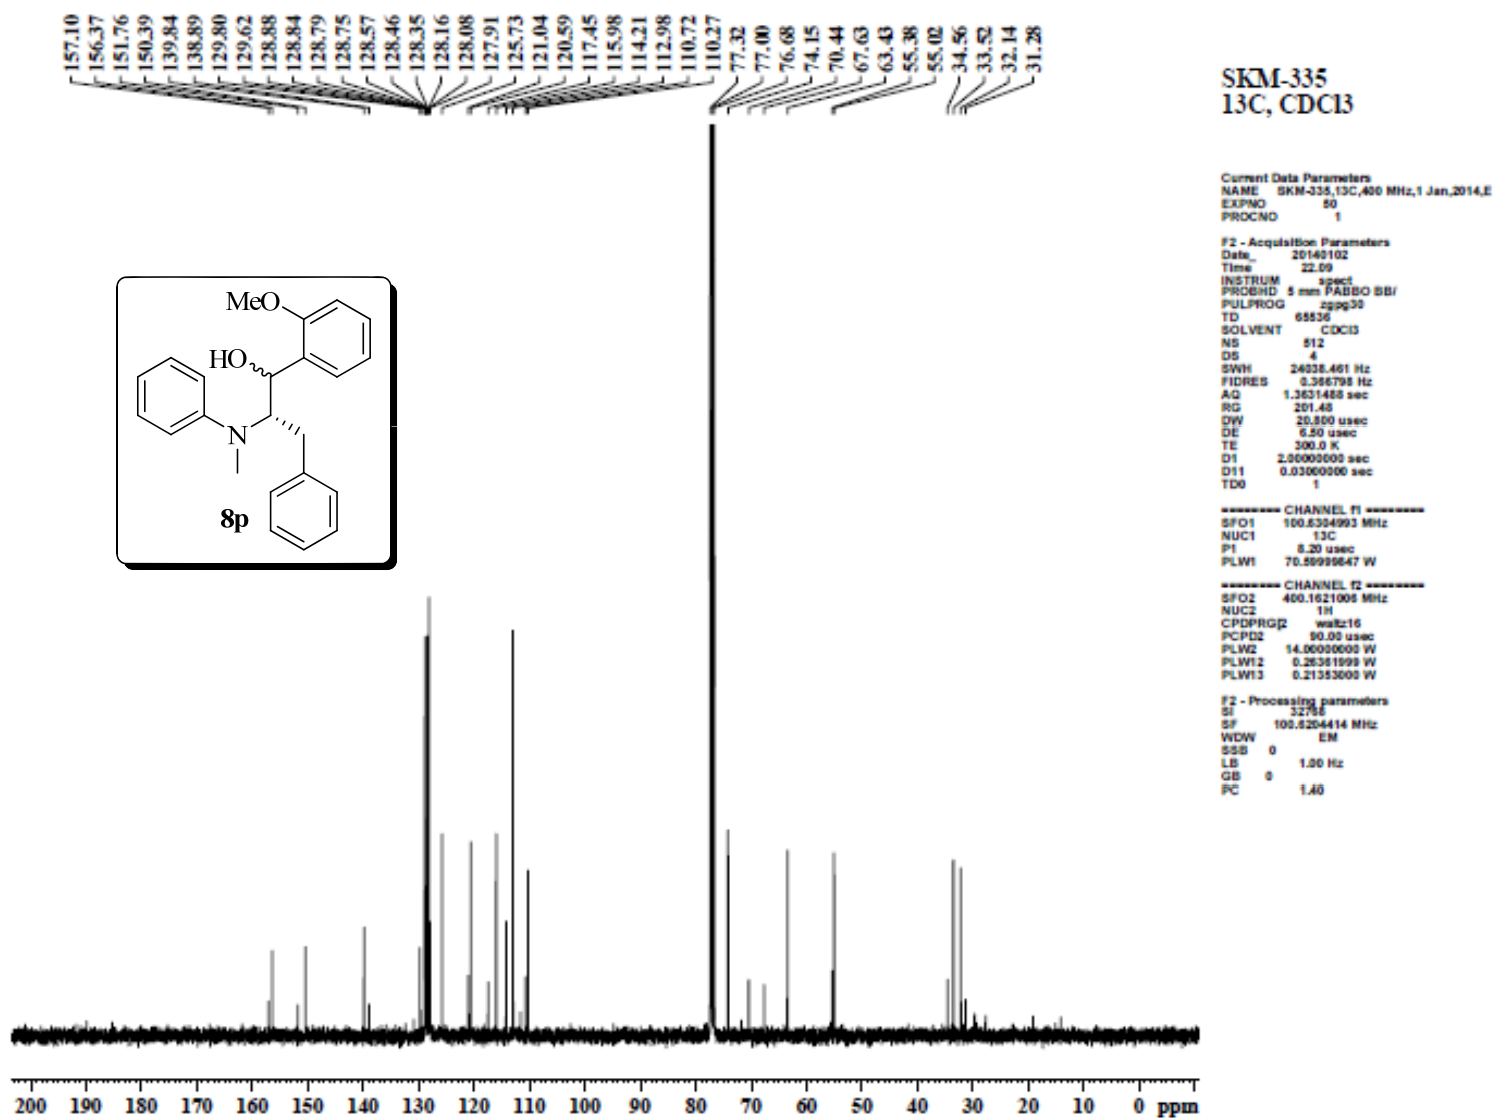

**Figure 56:**  $^{13}\text{C}$  -NMR Spectrum of **8p**.

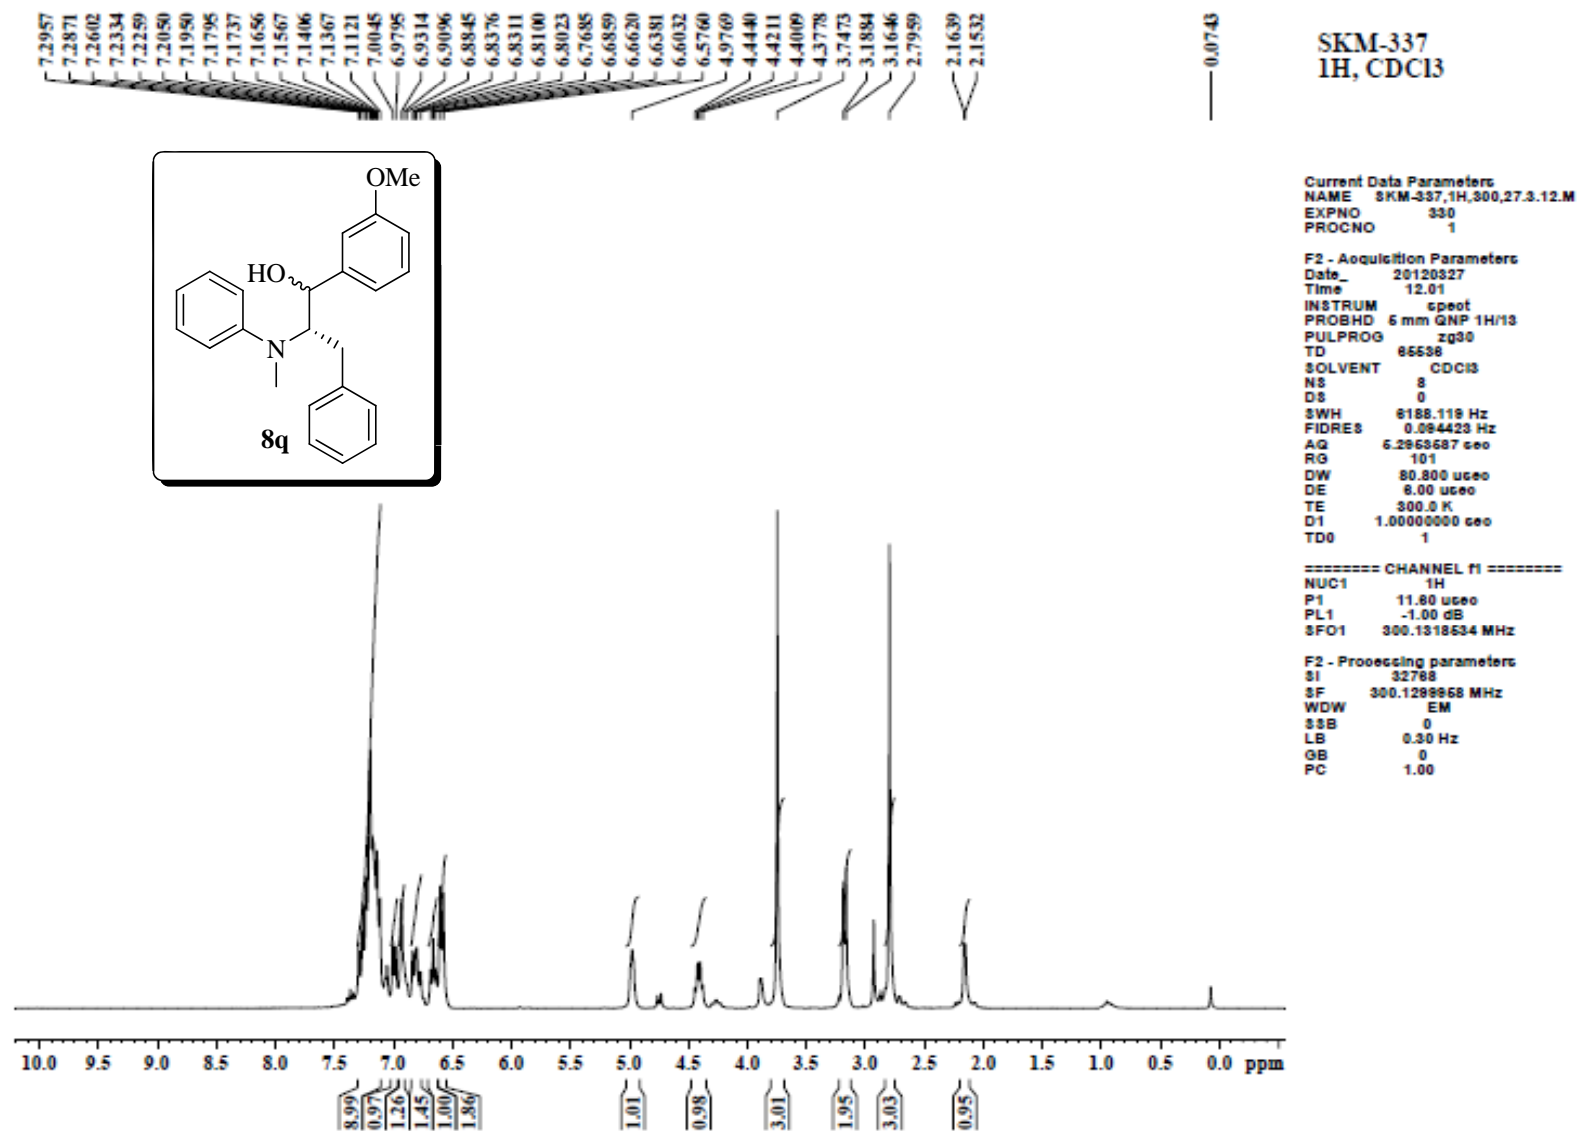

Figure 57: <sup>1</sup>H -NMR Spectrum of 8q.

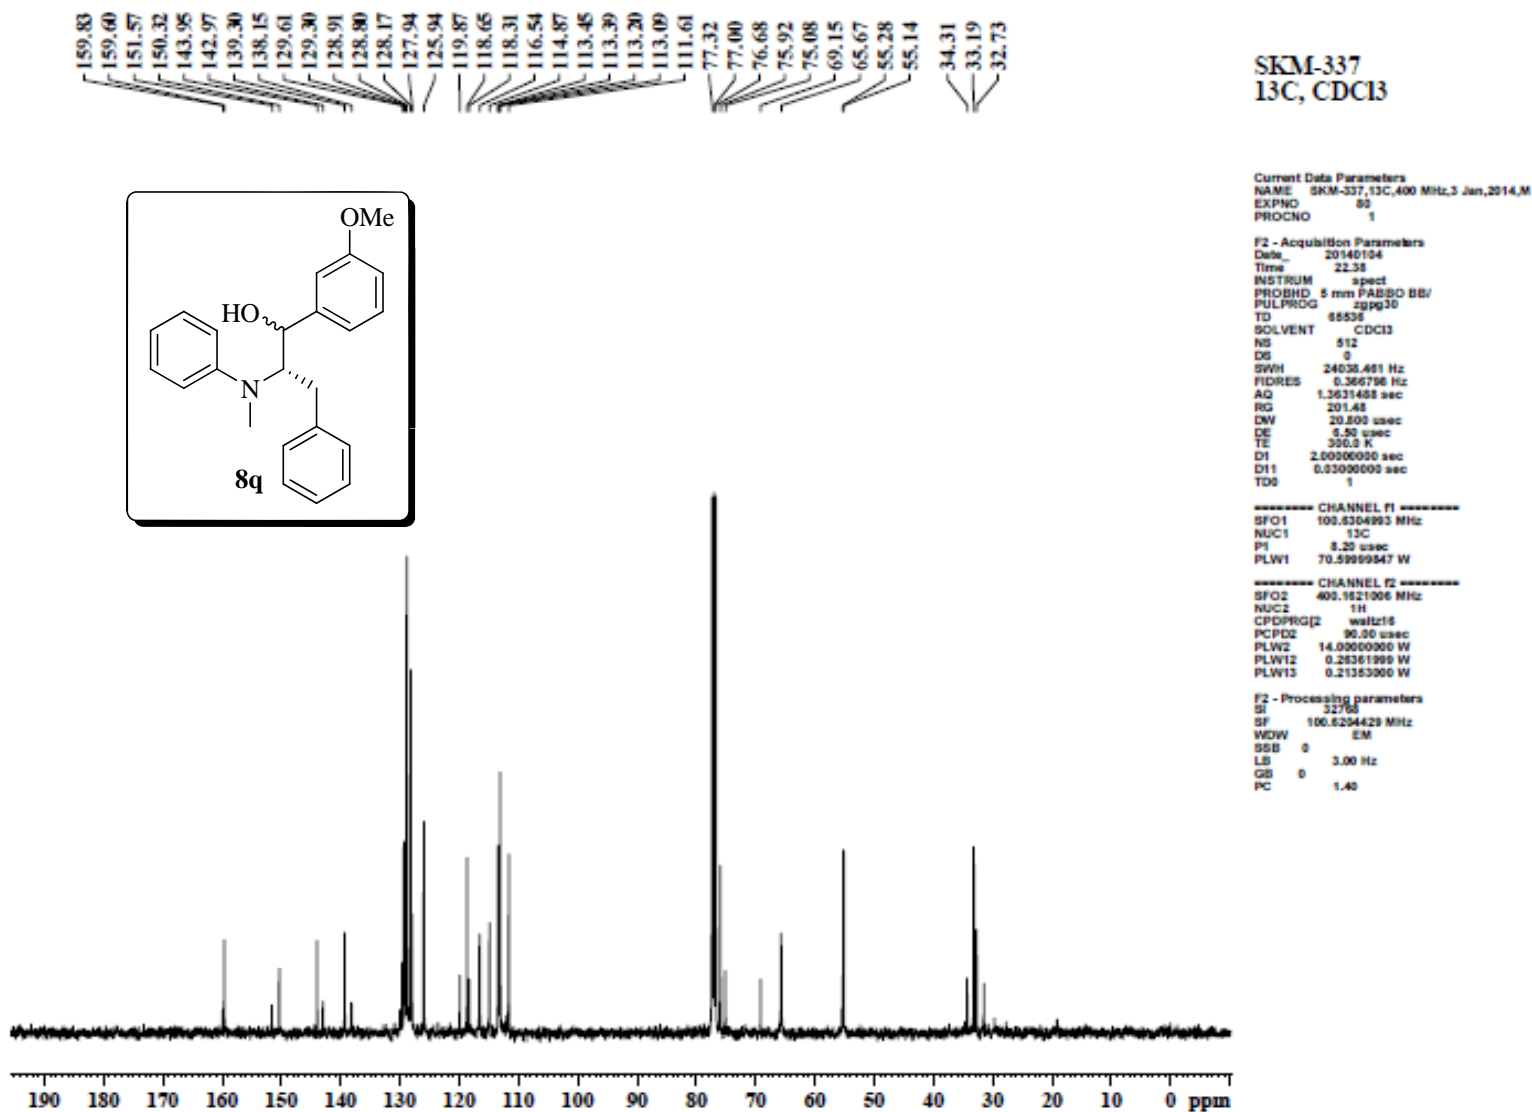

**Figure 58:** <sup>13</sup>C-NMR Spectrum of **8q**.

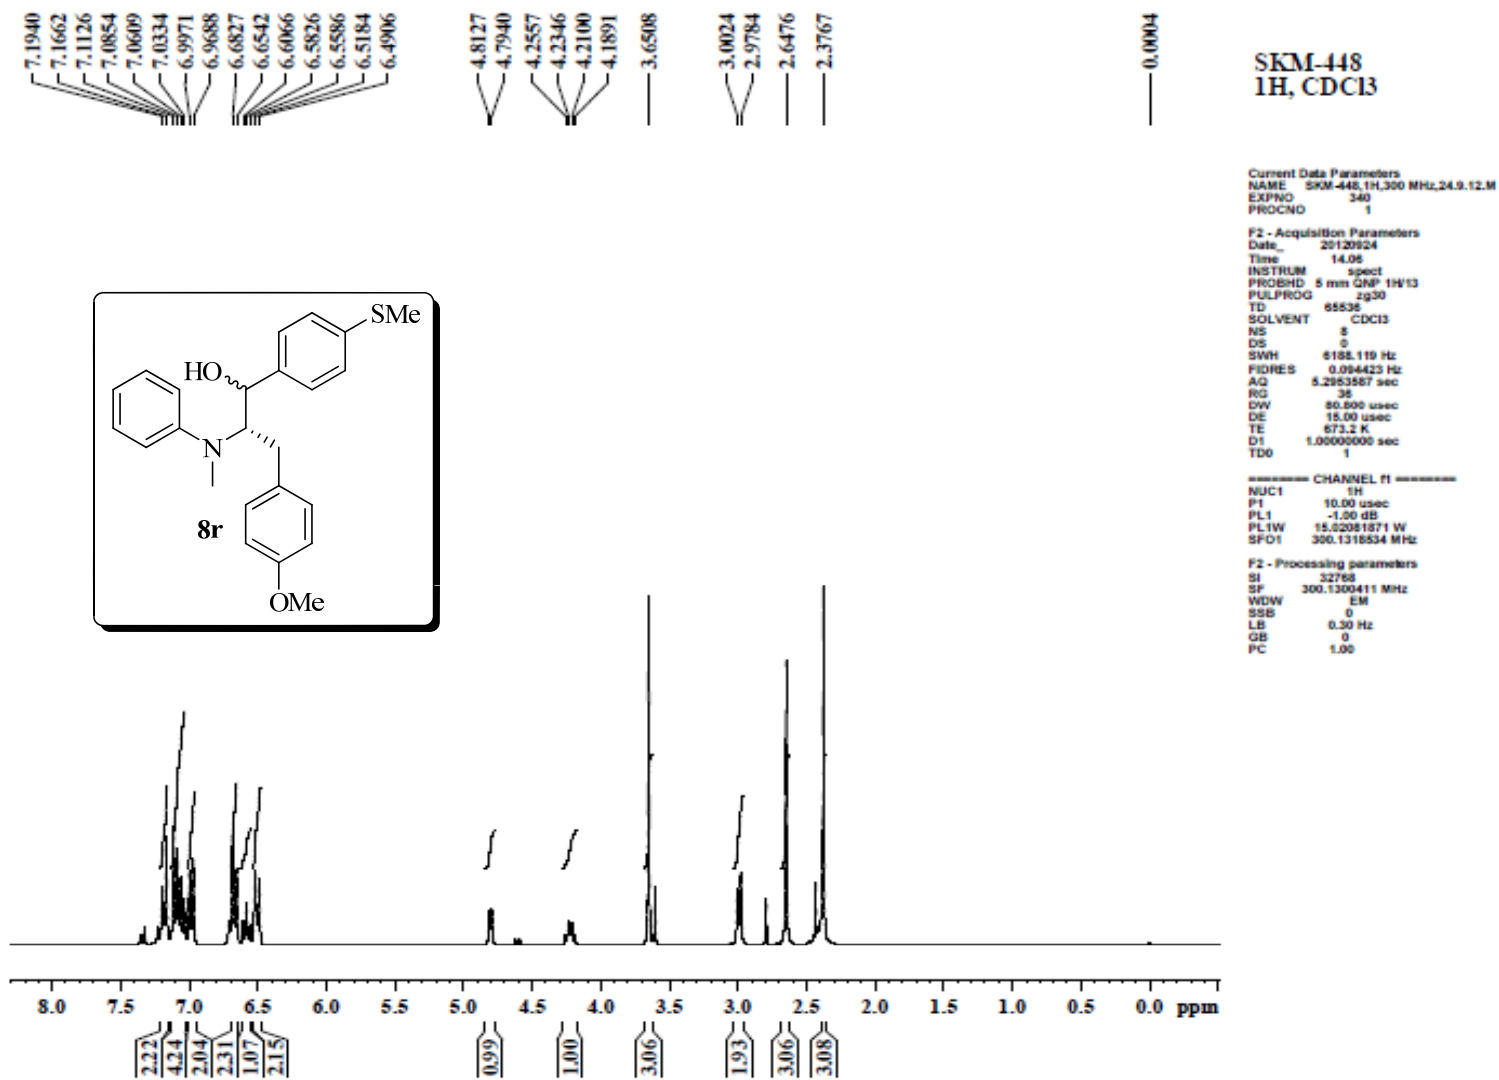

**Figure 59:**  $^1\text{H}$ -NMR Spectrum of **8r**.

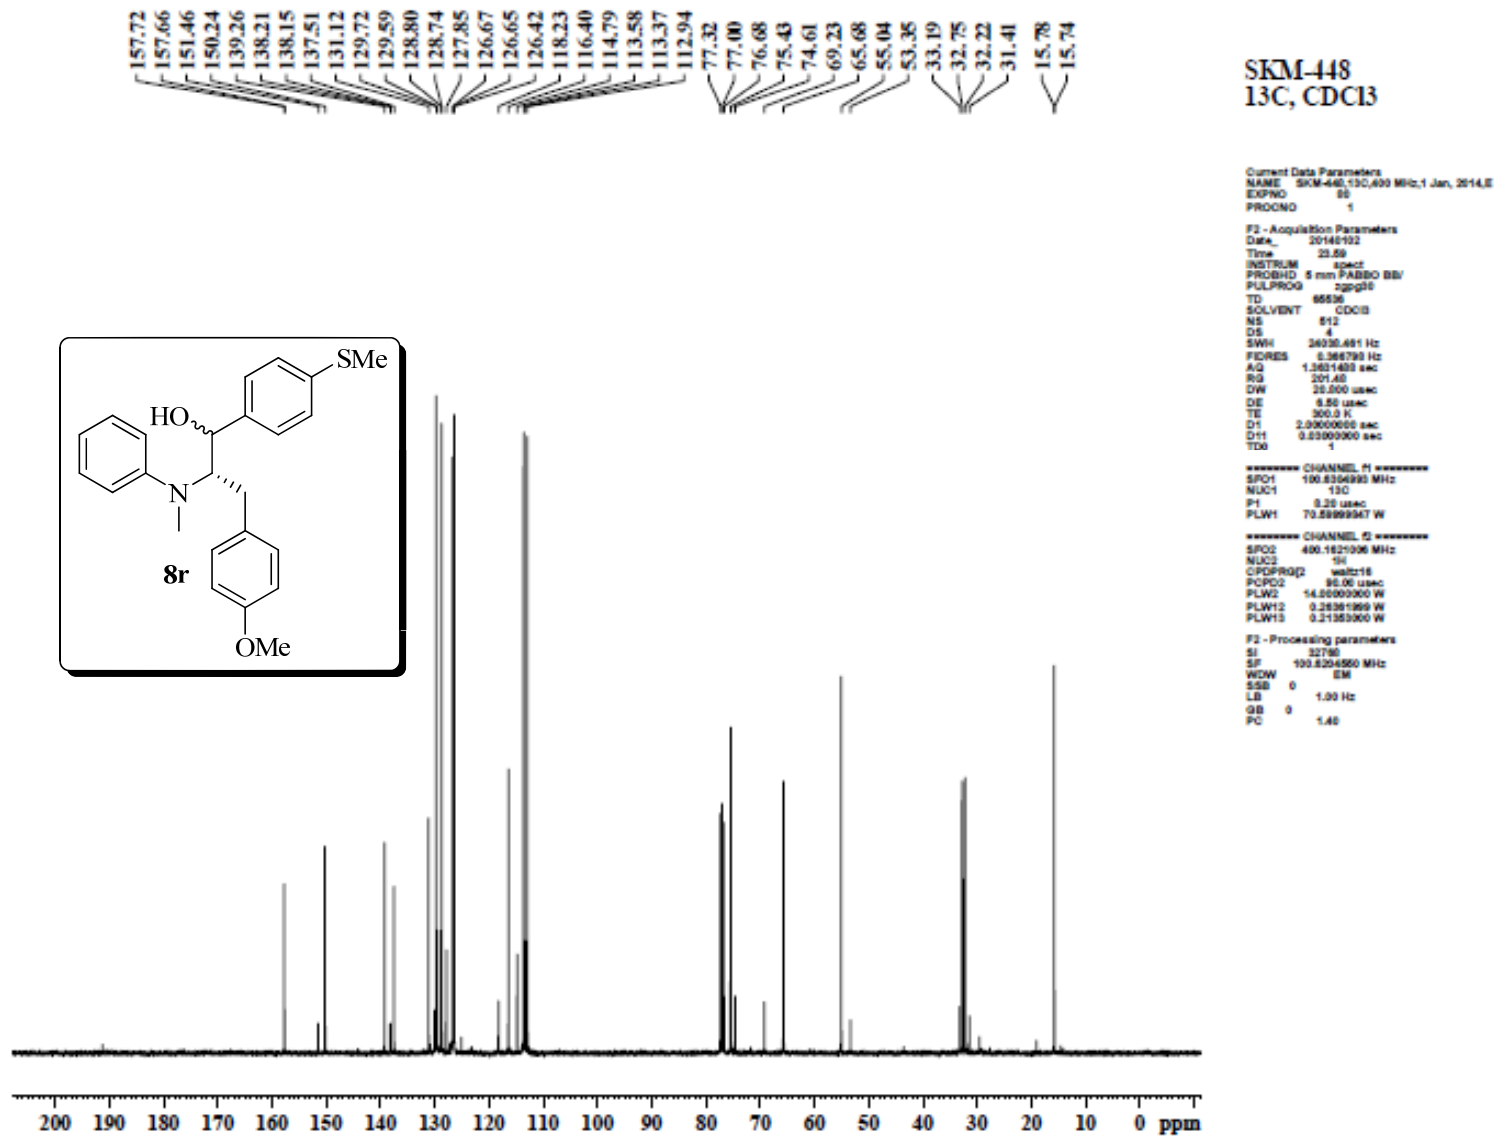

Figure 60:  $^{13}\text{C}$  -NMR Spectrum of **8r**.



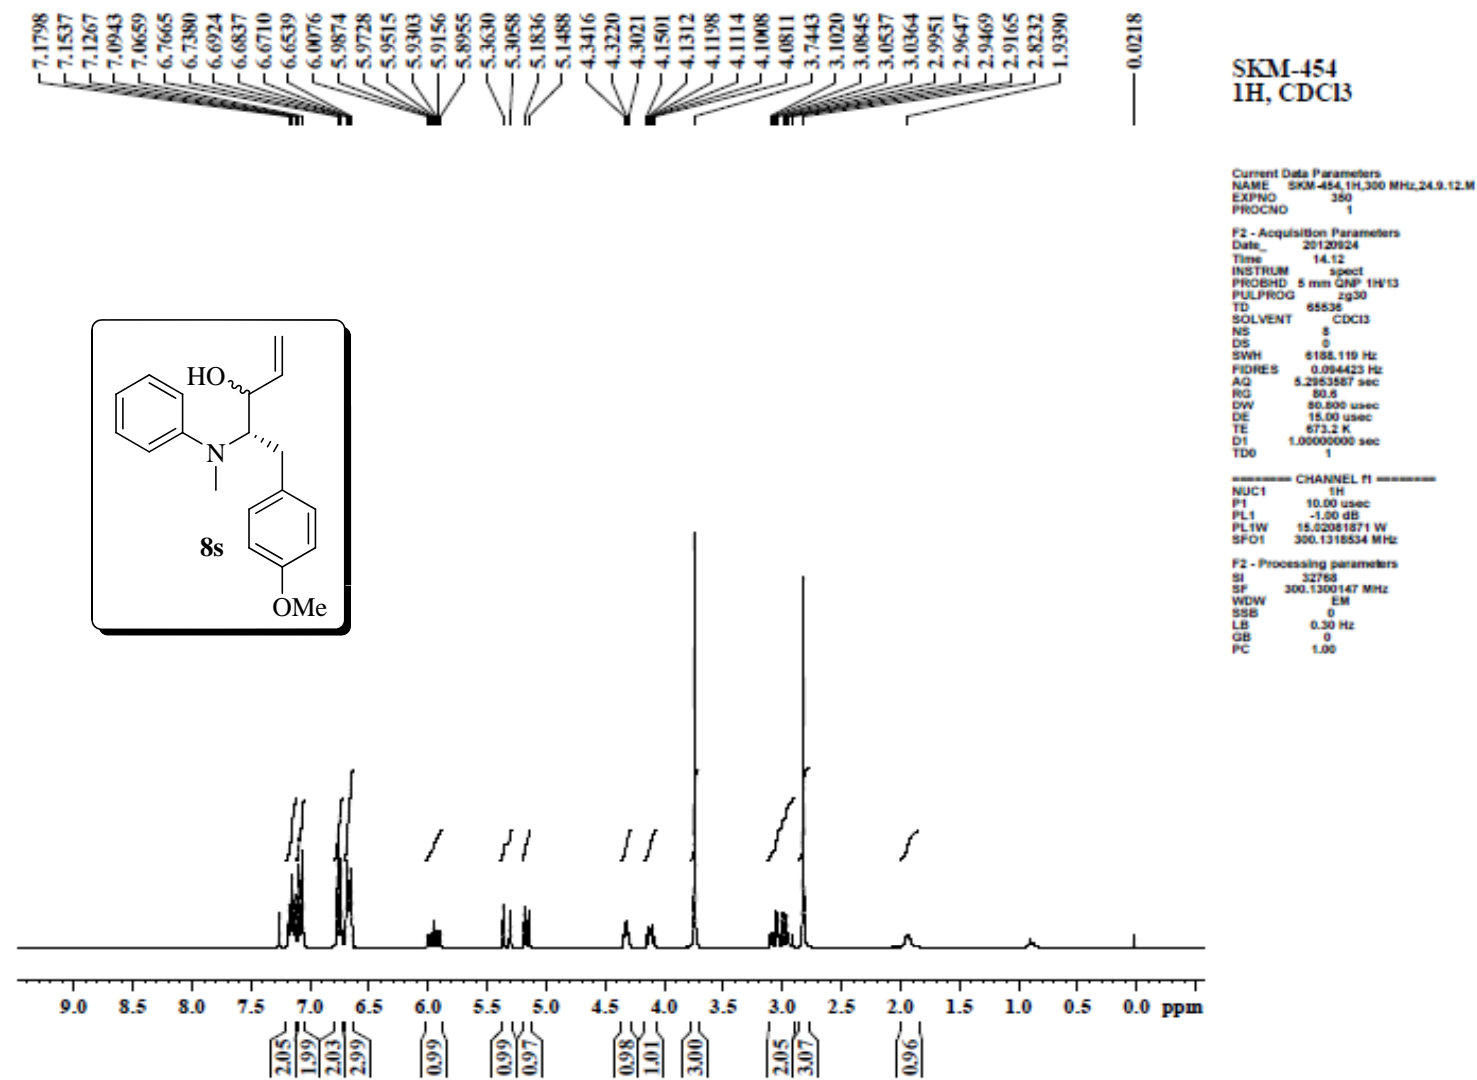

**Figure 61:** <sup>1</sup>H -NMR Spectrum of **8s**.

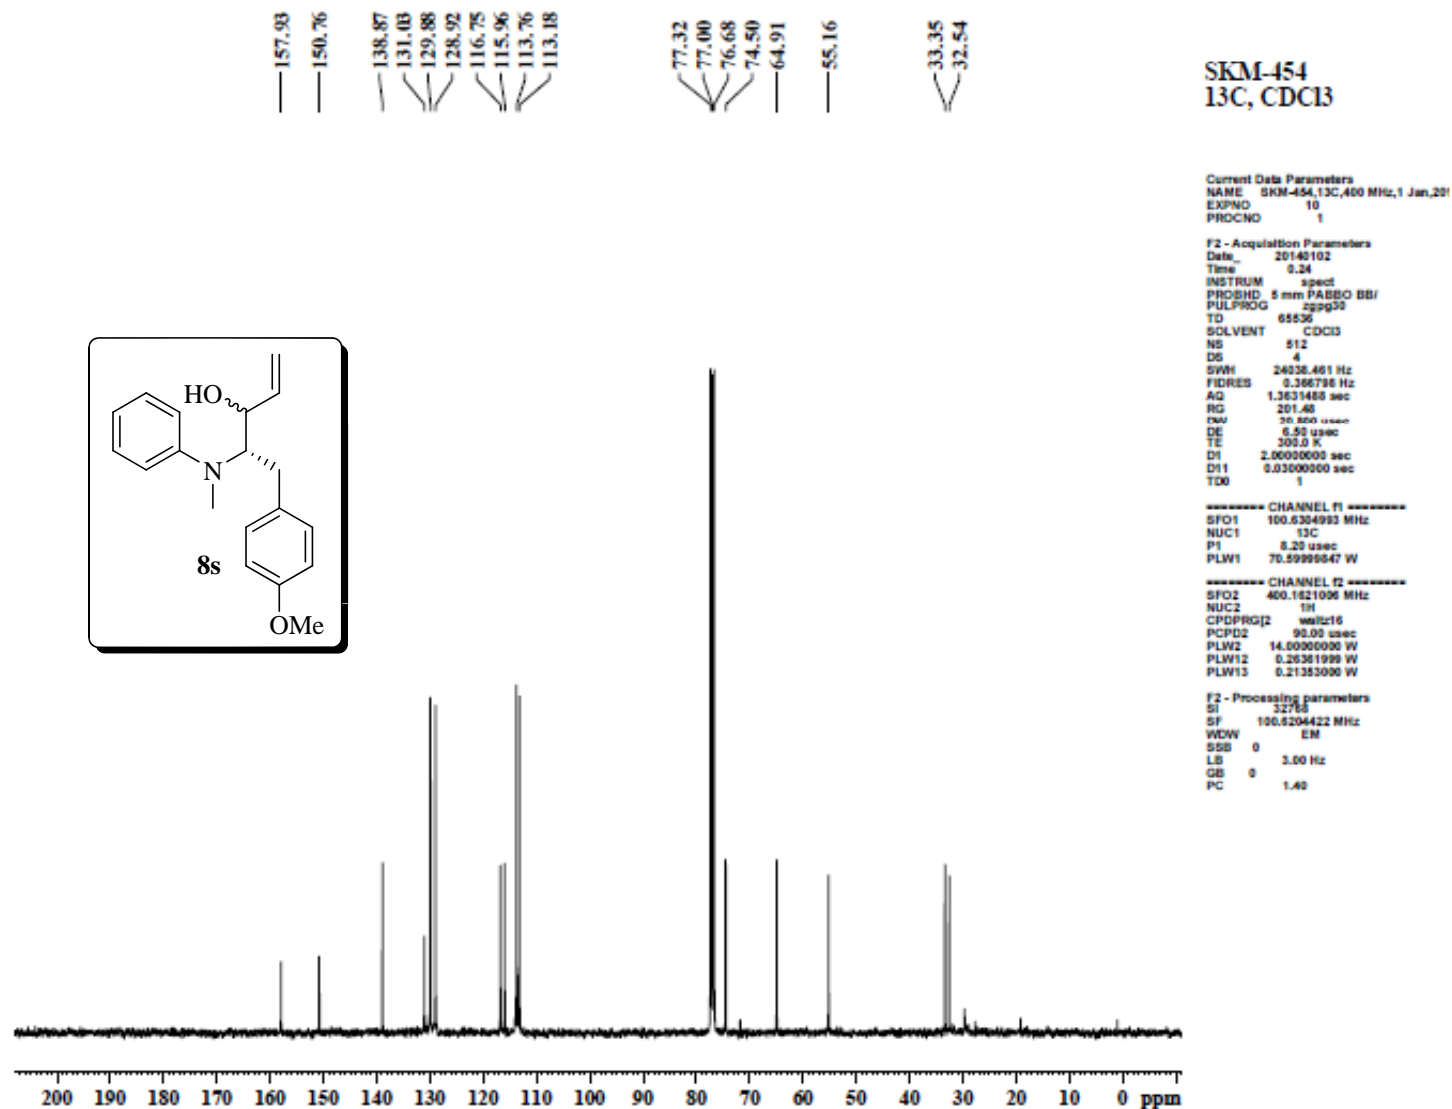

Figure 62:  $^{13}\text{C}$  -NMR Spectrum of **8s**.

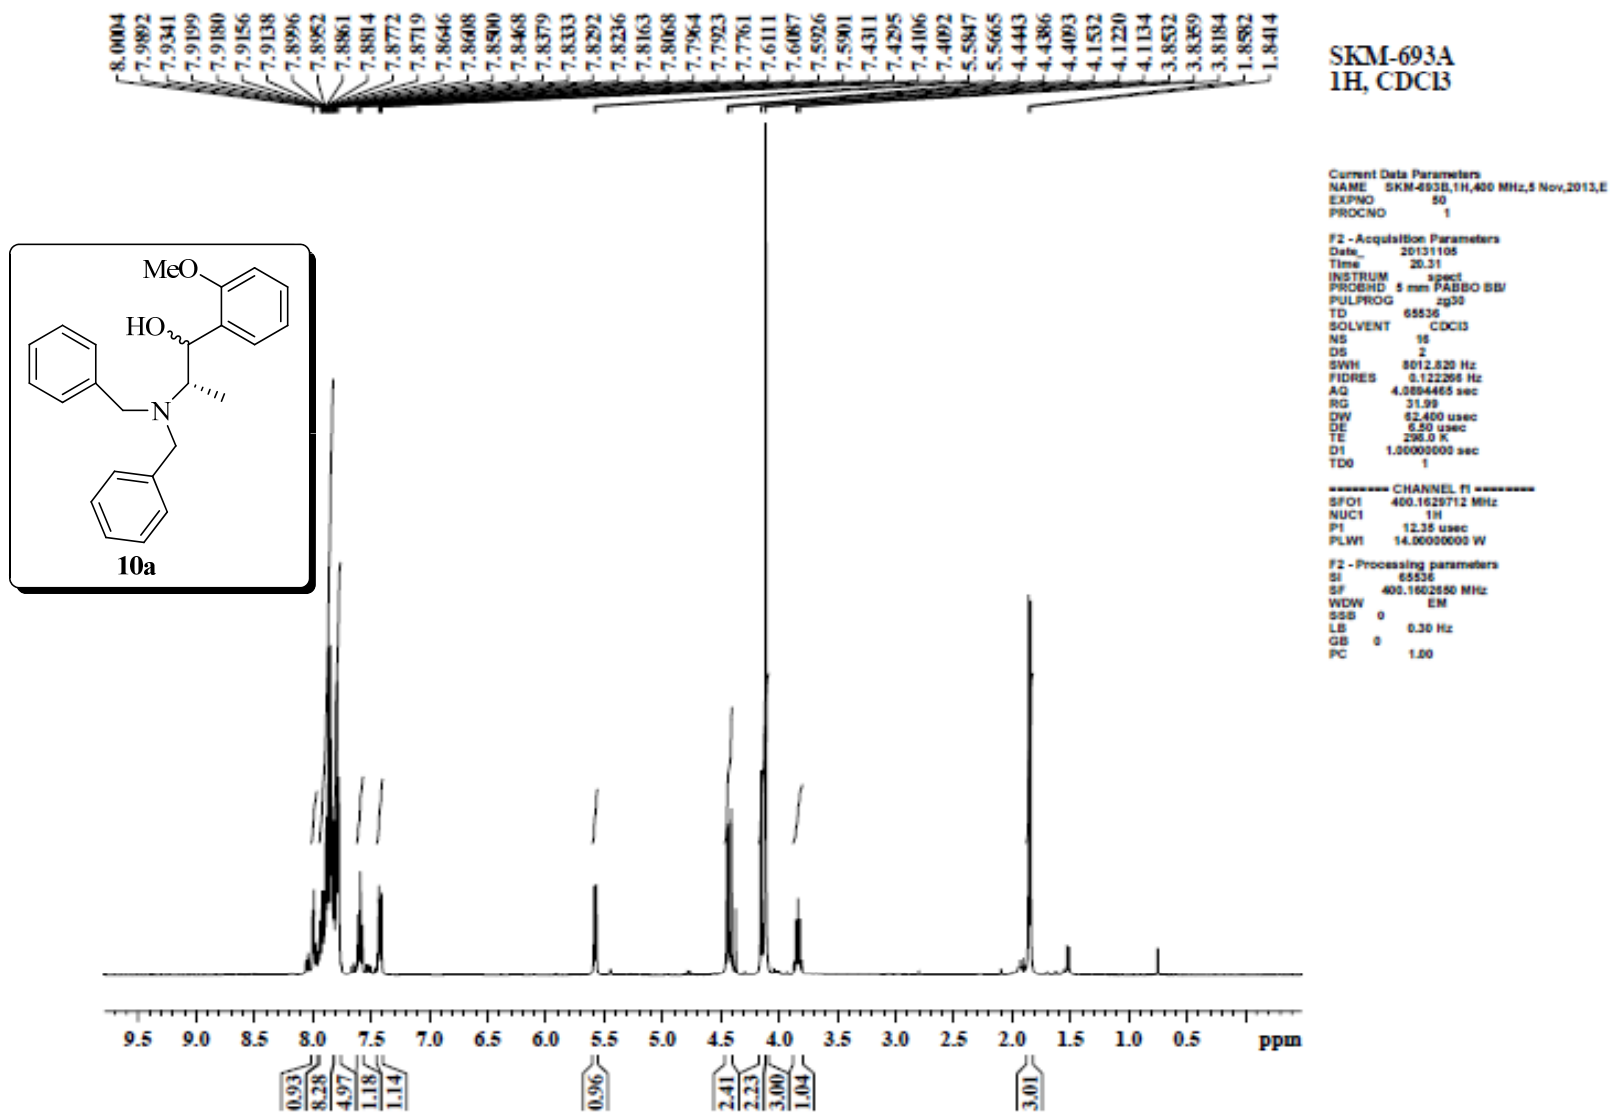

**Figure 63:**  $^1\text{H}$ -NMR Spectrum of **10a**.

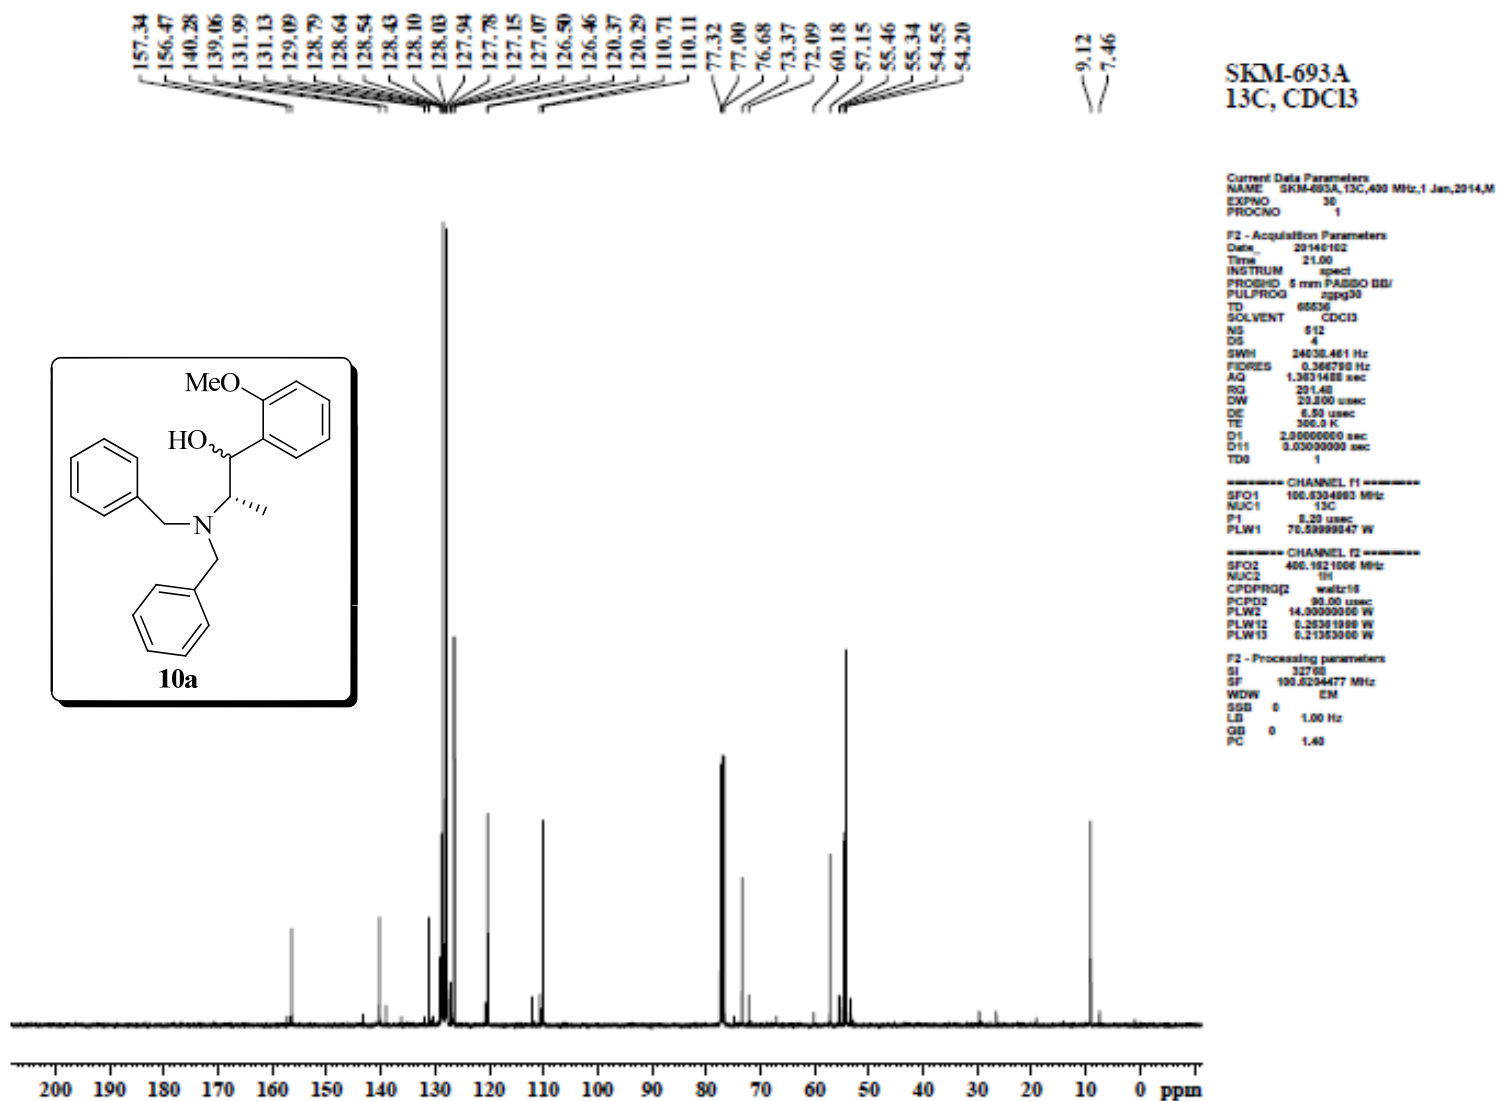

**Figure 64:** <sup>13</sup>C -NMR Spectrum of **10a**.

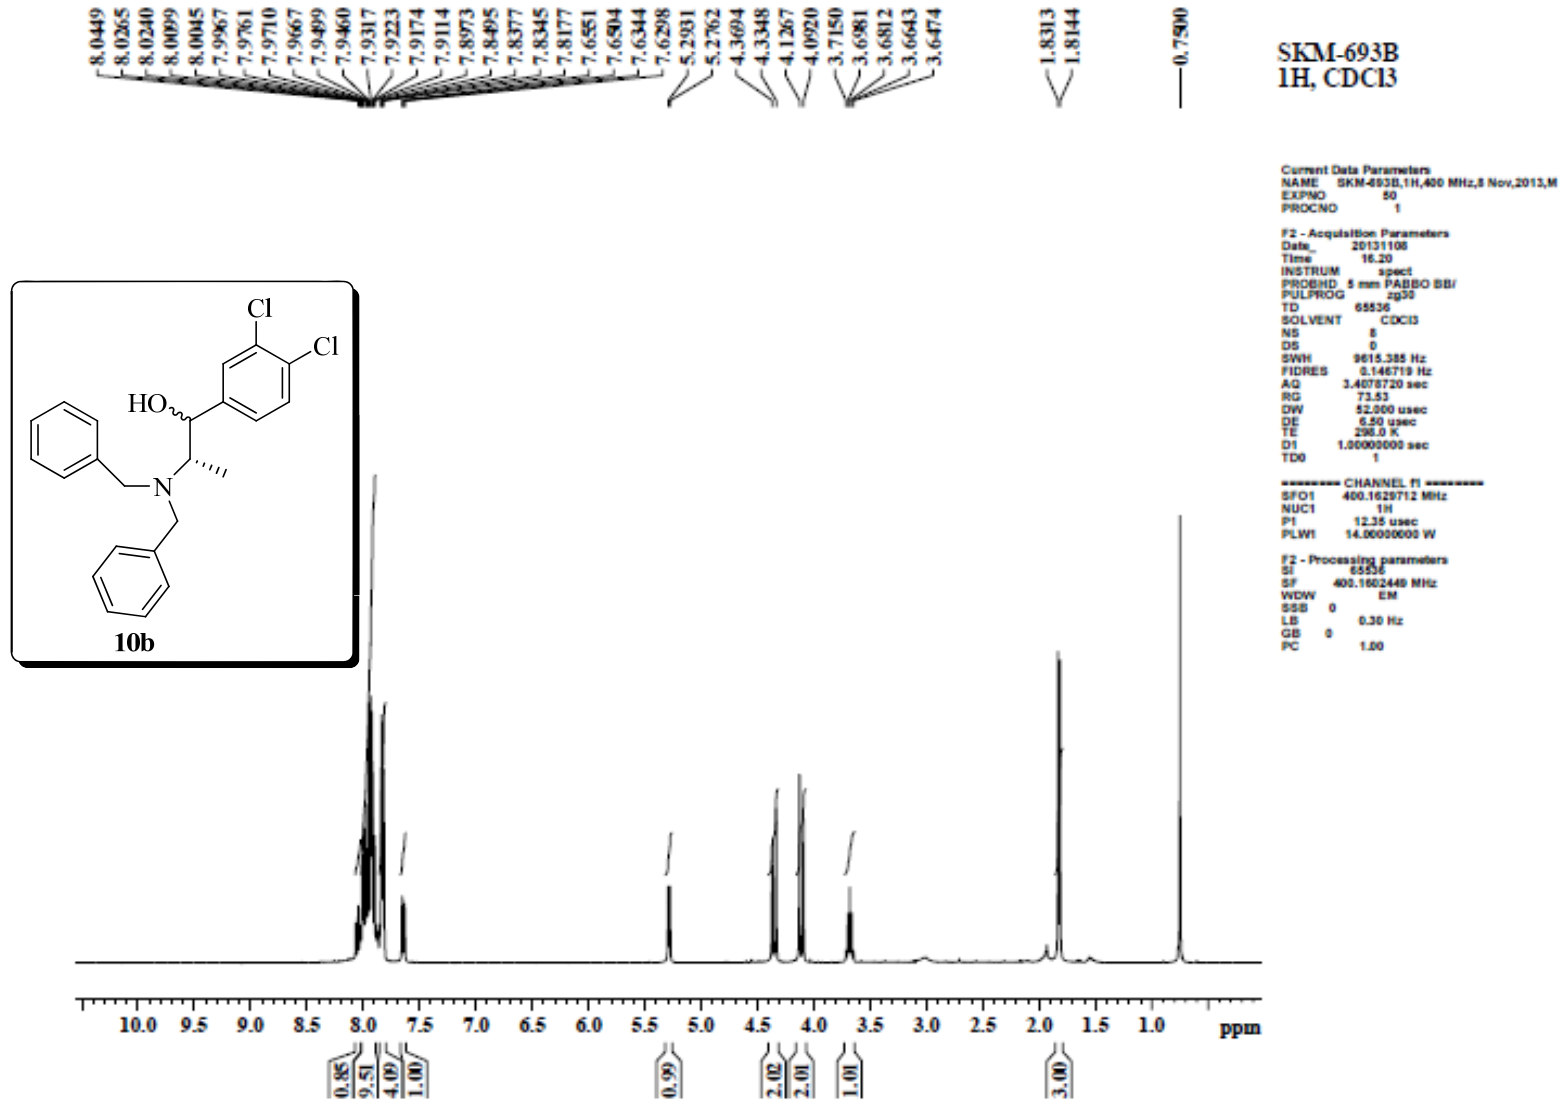

Figure 65: <sup>1</sup>H -NMR Spectrum of 10b.

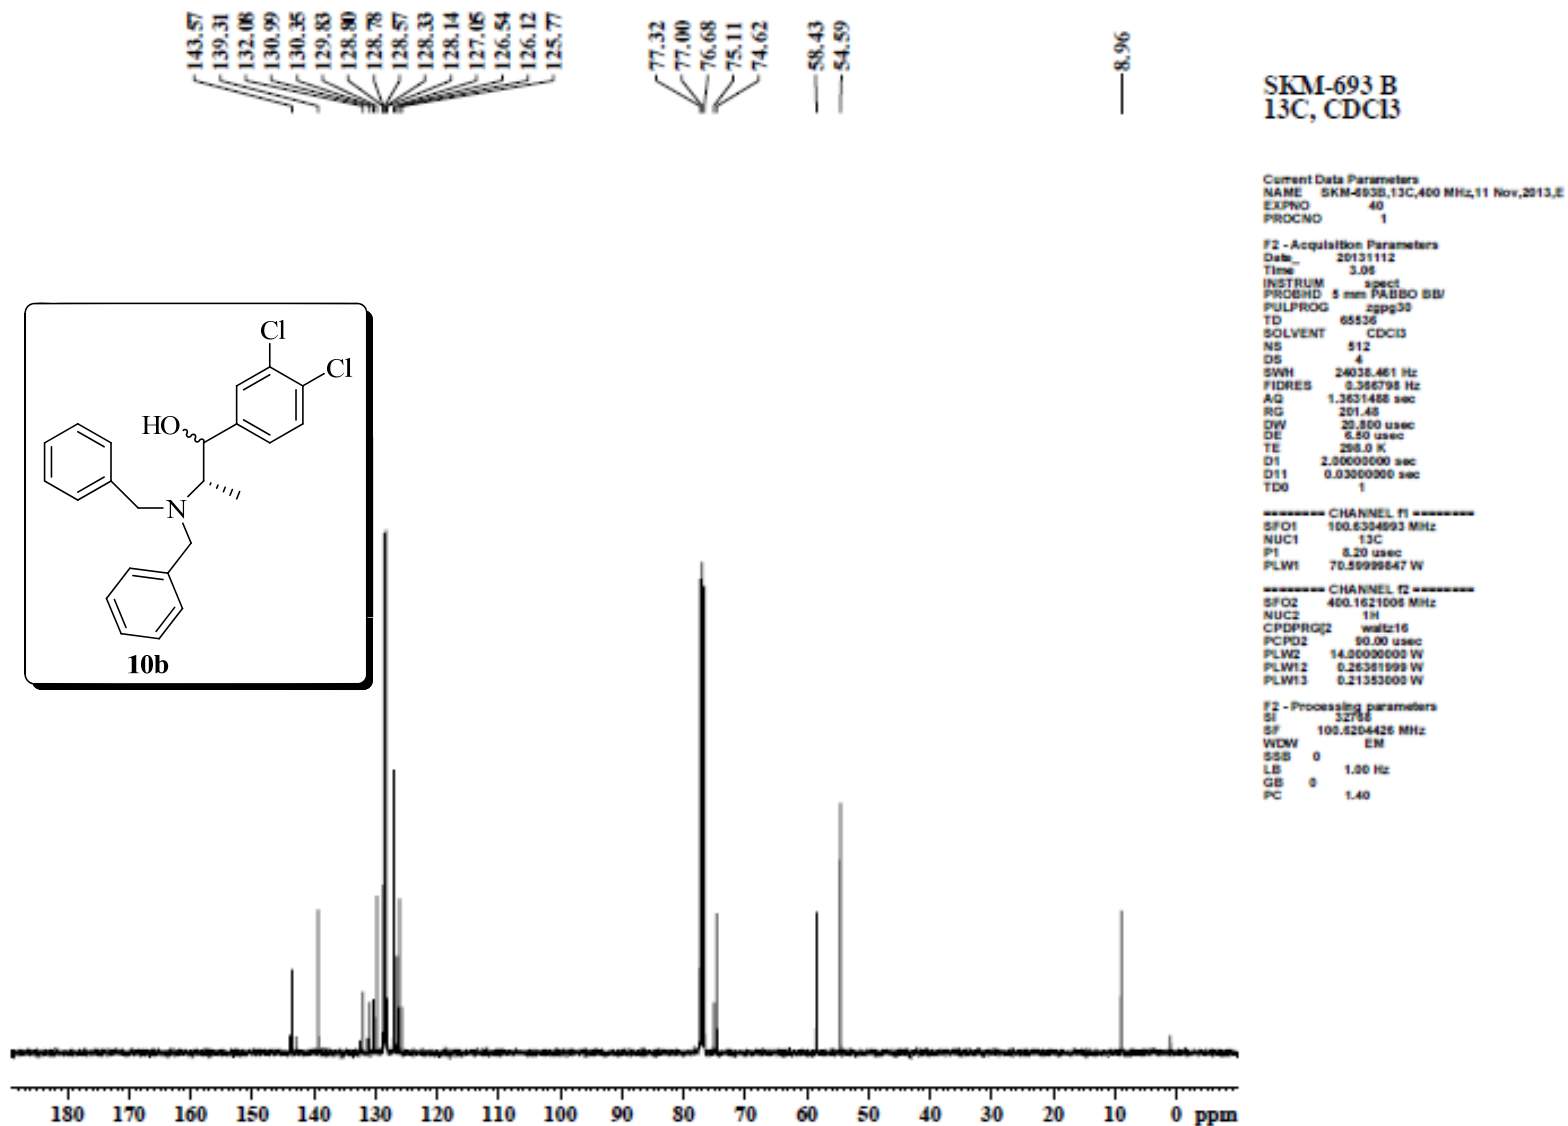

**Figure 66:**  $^{13}\text{C}$  -NMR Spectrum of **10b**.

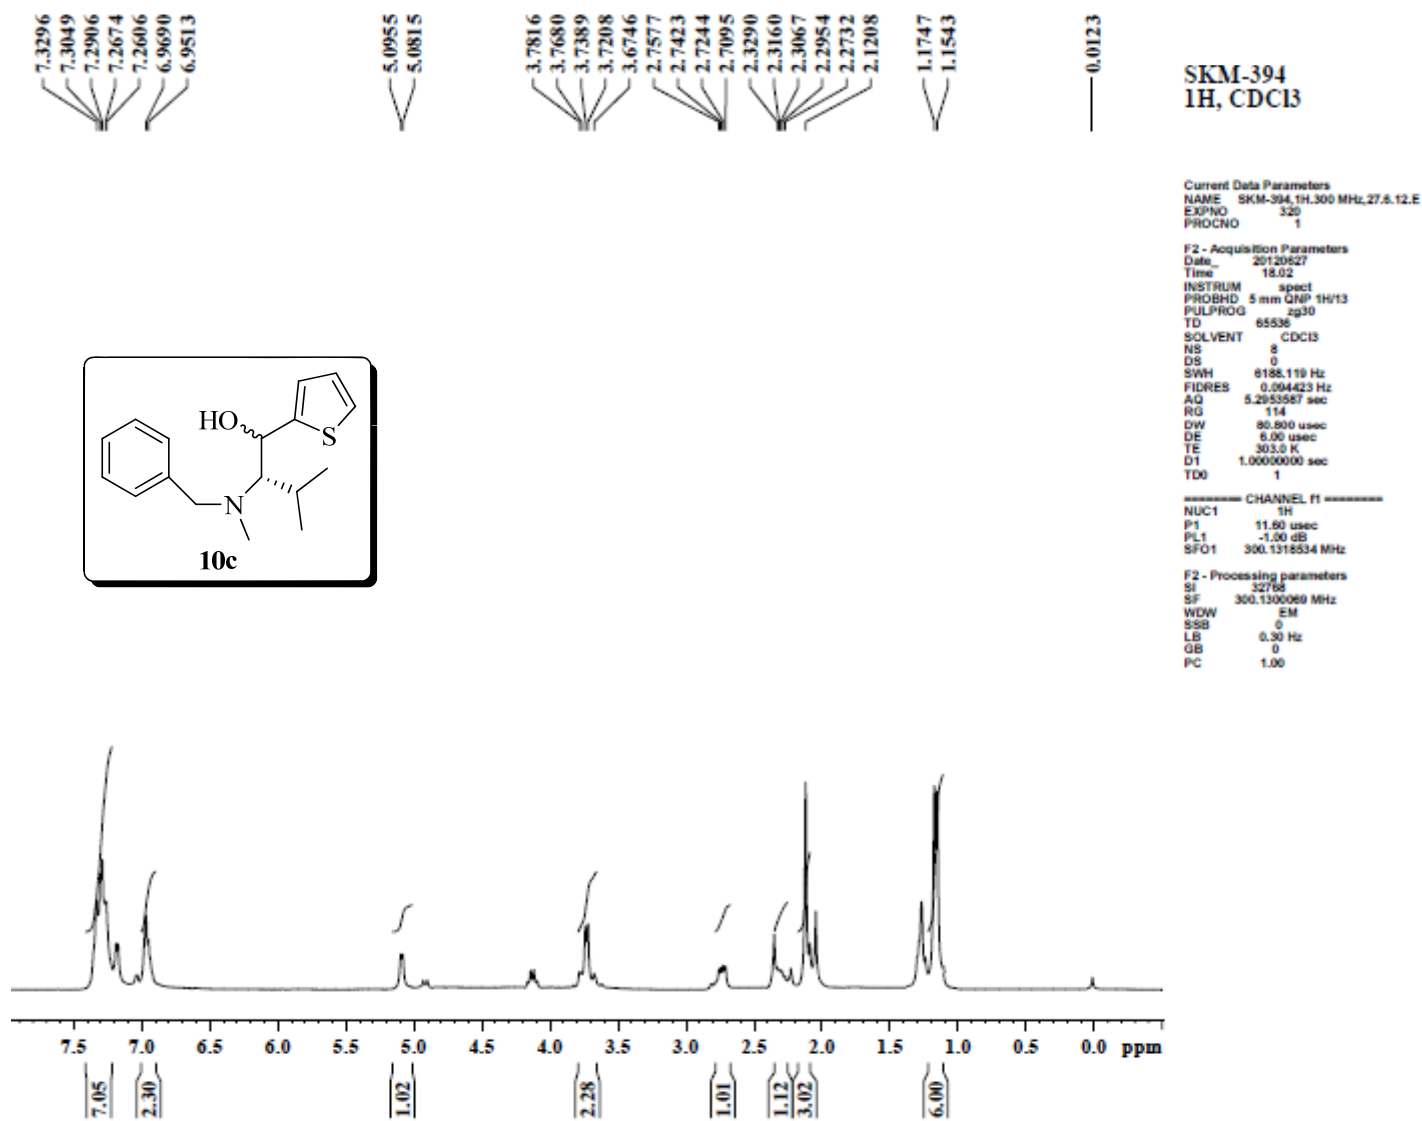

Figure 67:  $^1\text{H}$ -NMR Spectrum of **10c**.

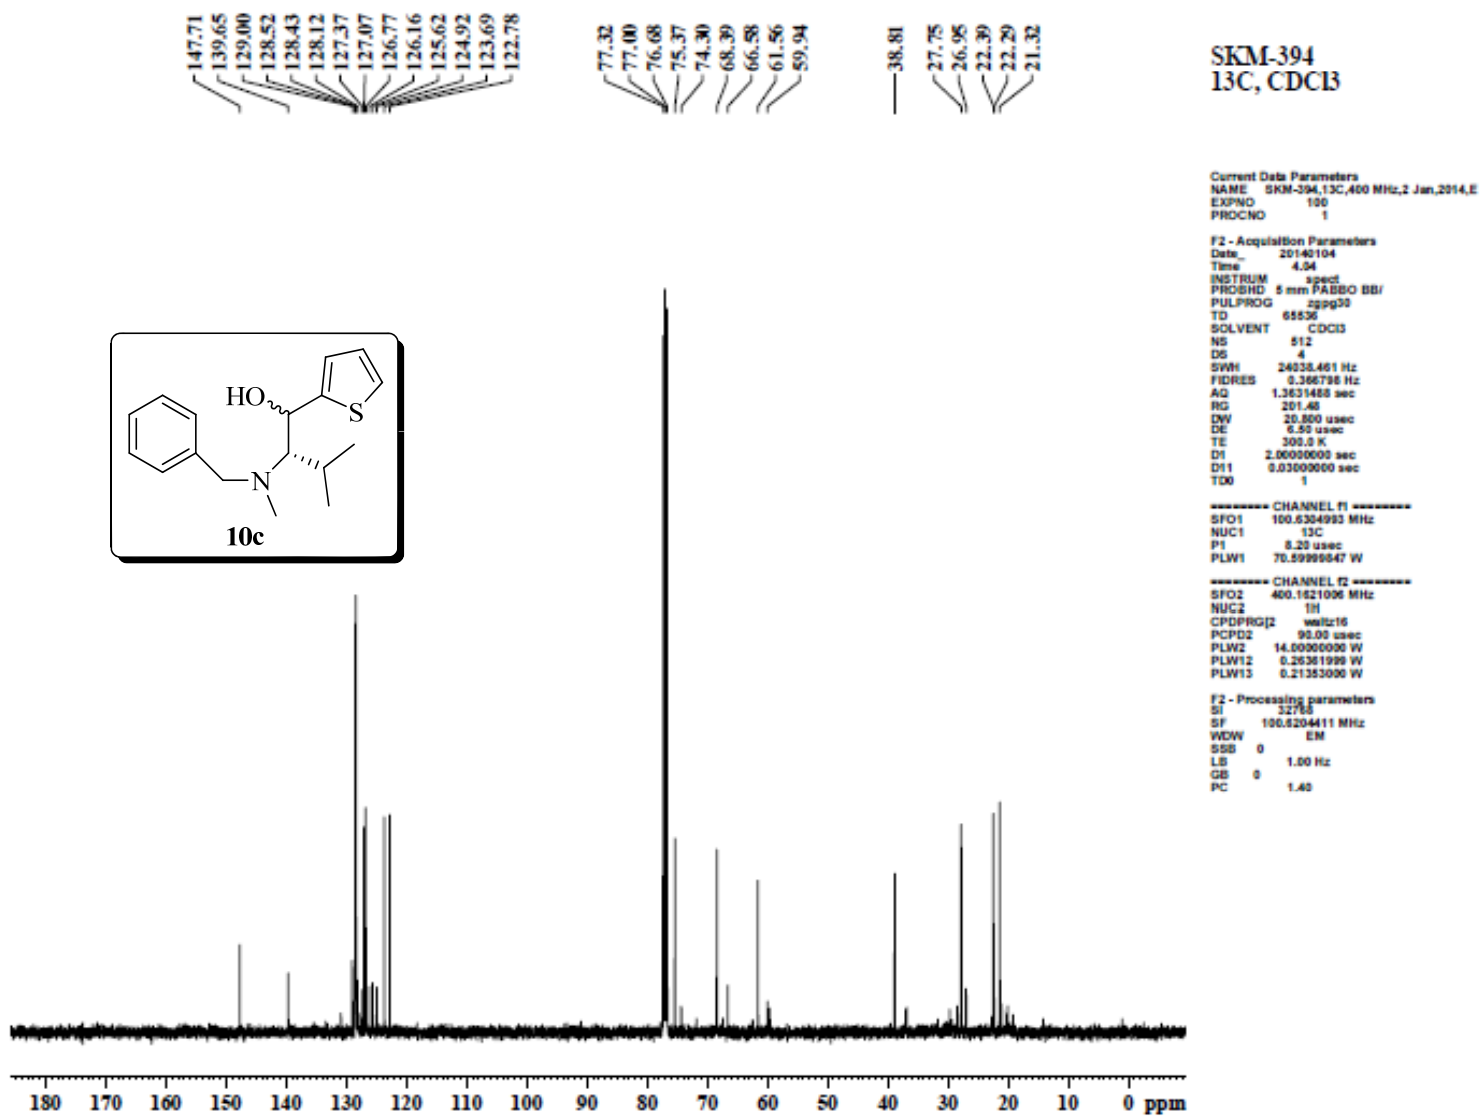

**Figure 68:** <sup>13</sup>C-NMR Spectrum of **10c**.



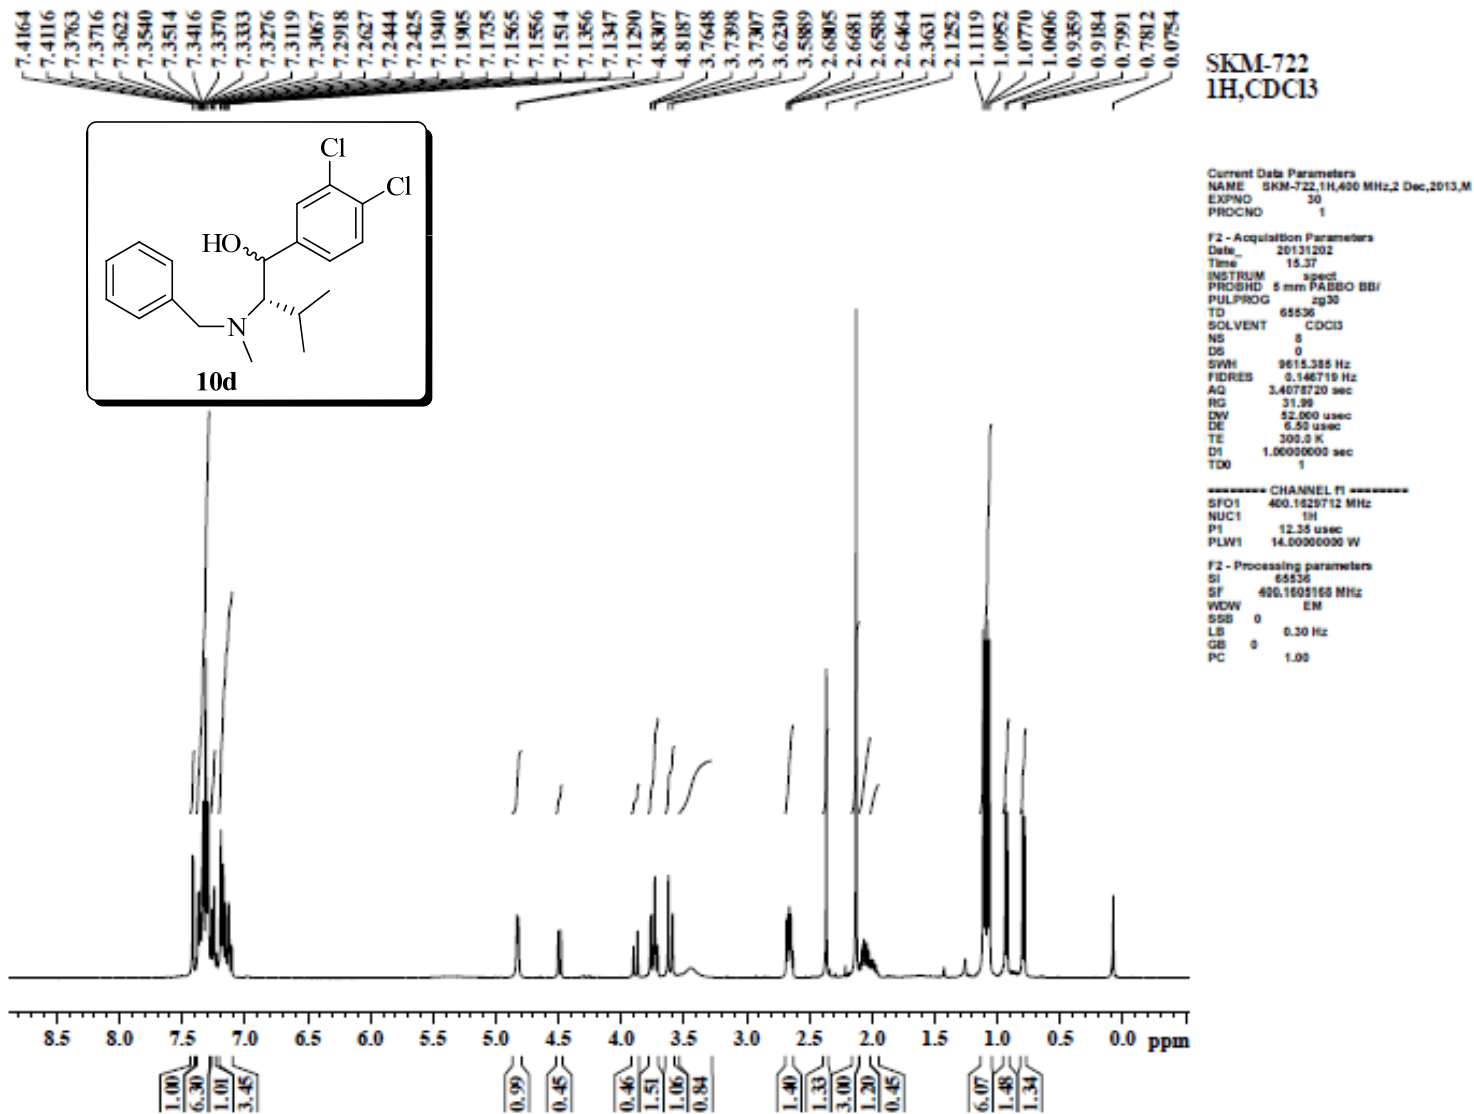

**Figure 69: <sup>1</sup>H -NMR Spectrum of 10d.**

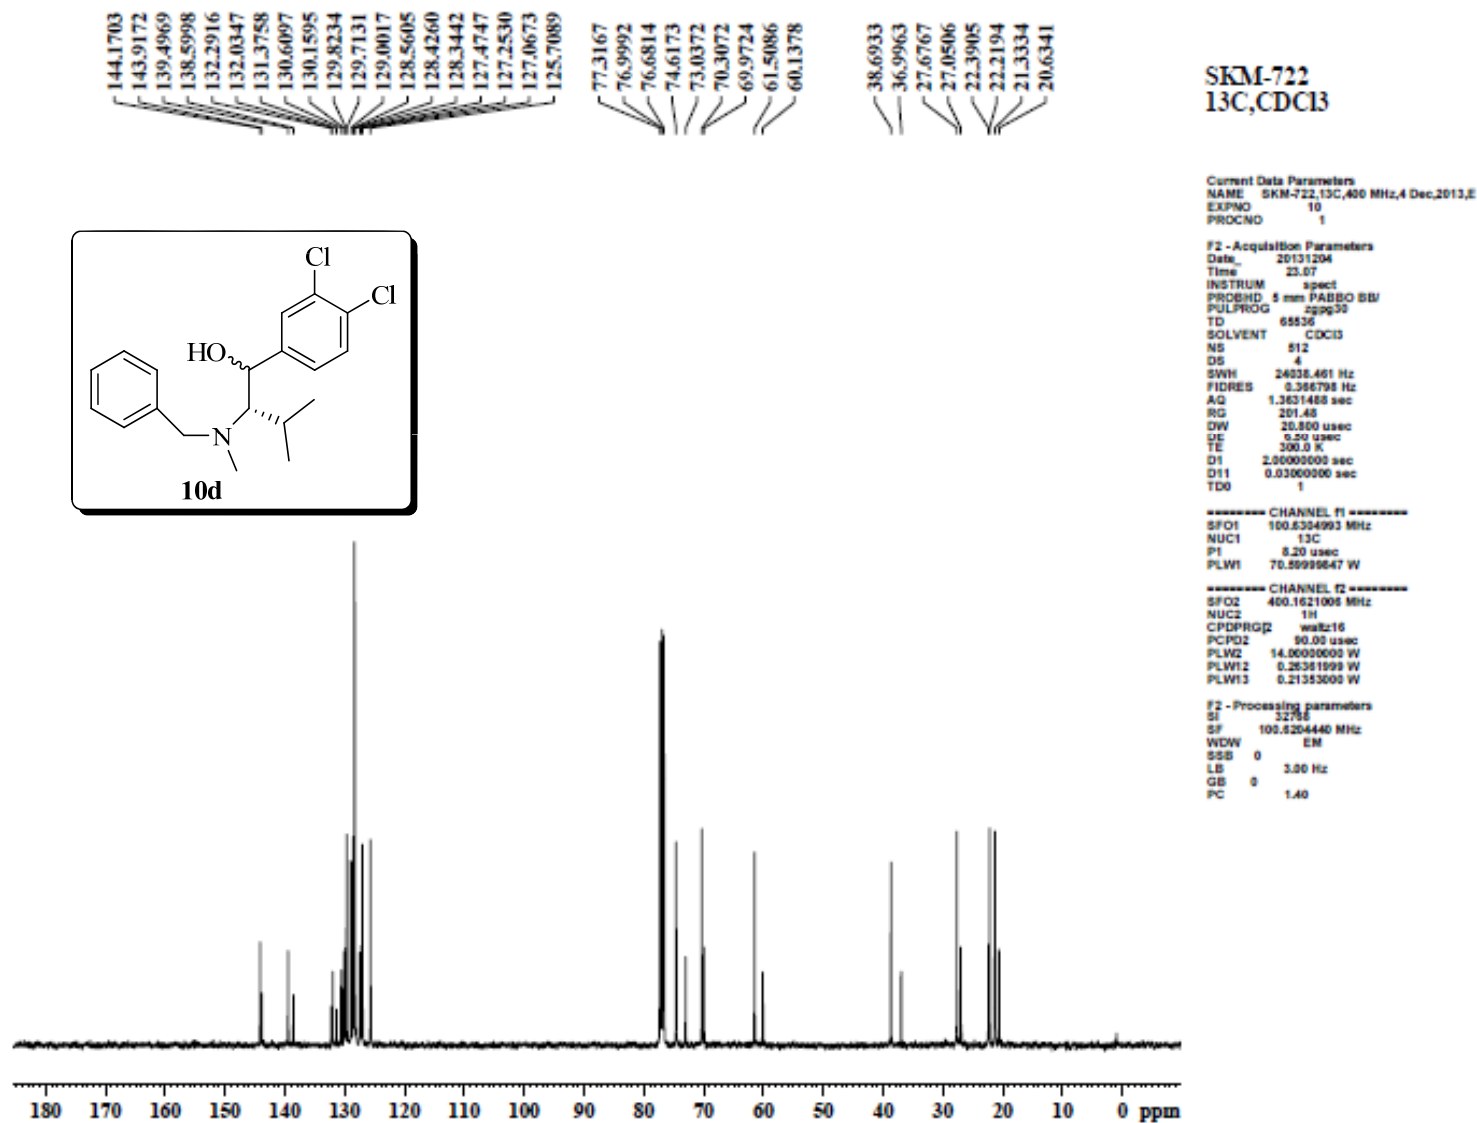

**Figure 70:** <sup>13</sup>C -NMR Spectrum of **10d**.

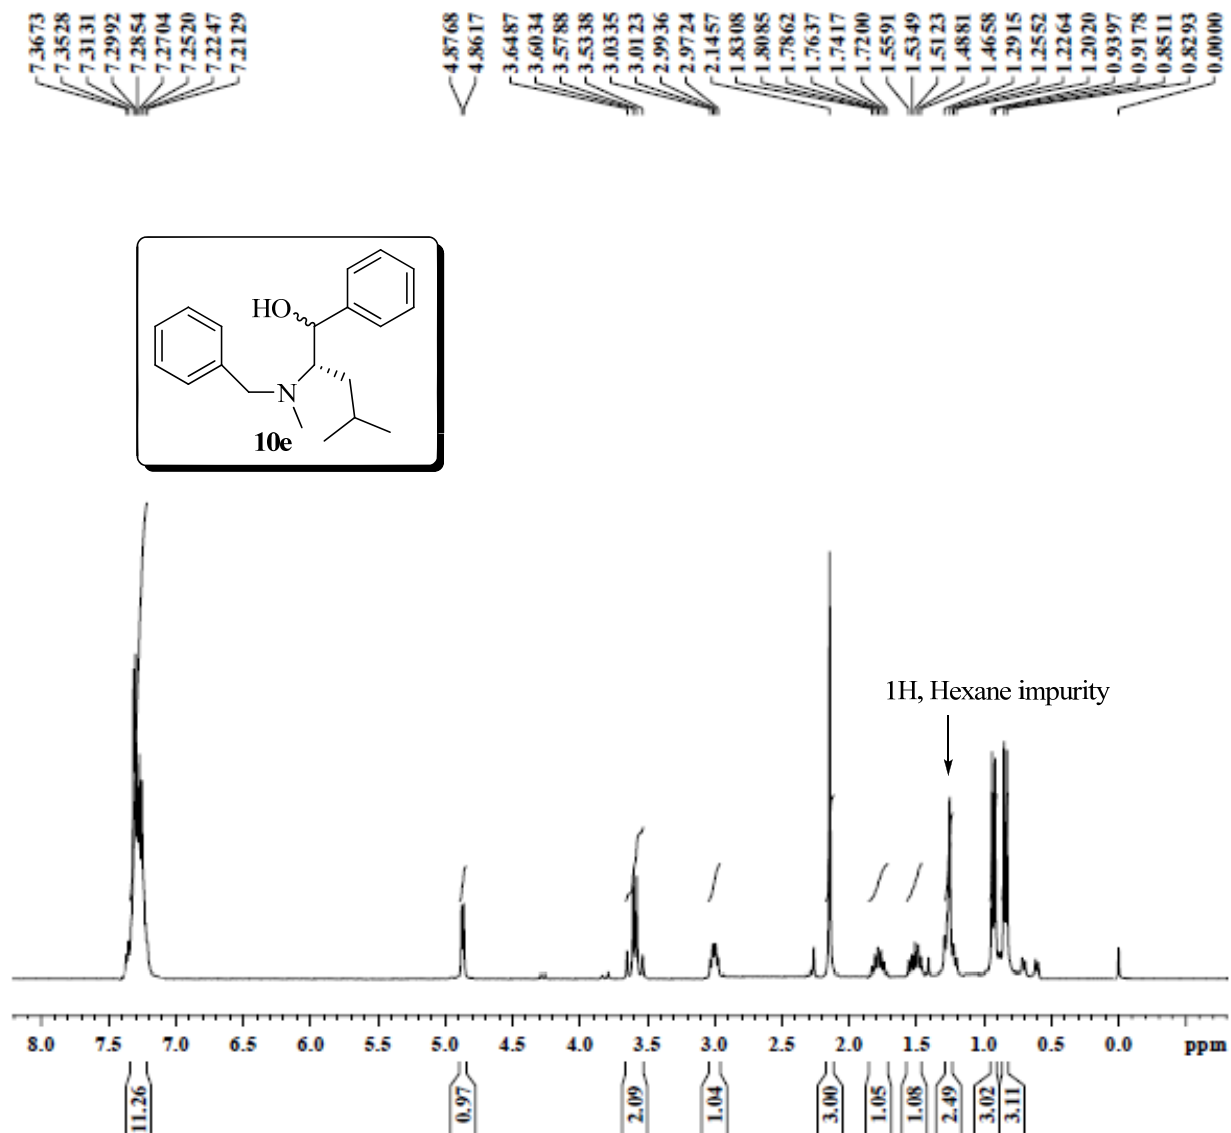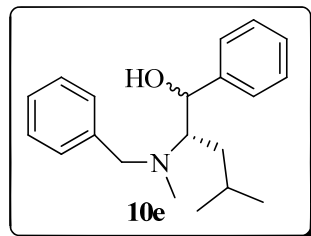

SKM-472  
1H, CDC13

Current Data Parameters  
NAME SKM-472.1H.300 MHz.27 Sep, 2012.M  
EXPNO 340  
PROCNO 1

F2 - Acquisition Parameters  
Date\_ 20120927  
Time 13.12  
INSTRUM spect  
PROBHD 5 mm QNP 1H/13  
PULPROG zg30  
TD 65536  
SOLVENT CDC13  
NS 8  
DS 0  
SWH 6188.119 Hz  
FIDRES 0.094423 Hz  
AQ 5.2953088 sec  
RG 181  
DQ 80.800 usec  
DE 15.00 usec  
TE 673.2 K  
D1 1.00000000 sec  
TD0 1

===== CHANNEL f1 =====  
NUC1 1H  
P1 10.00 usec  
PL1 -1.00 dB  
PL1W 15.02081871 W  
SFO1 300.1318534 MHz

F2 - Processing parameters  
SI 32768  
SF 300.1300187 MHz  
WDW EM  
SSB 0  
LB 0.30 Hz  
GB 0  
PC 1.00

Figure 71: <sup>1</sup>H -NMR Spectrum of **10e**.

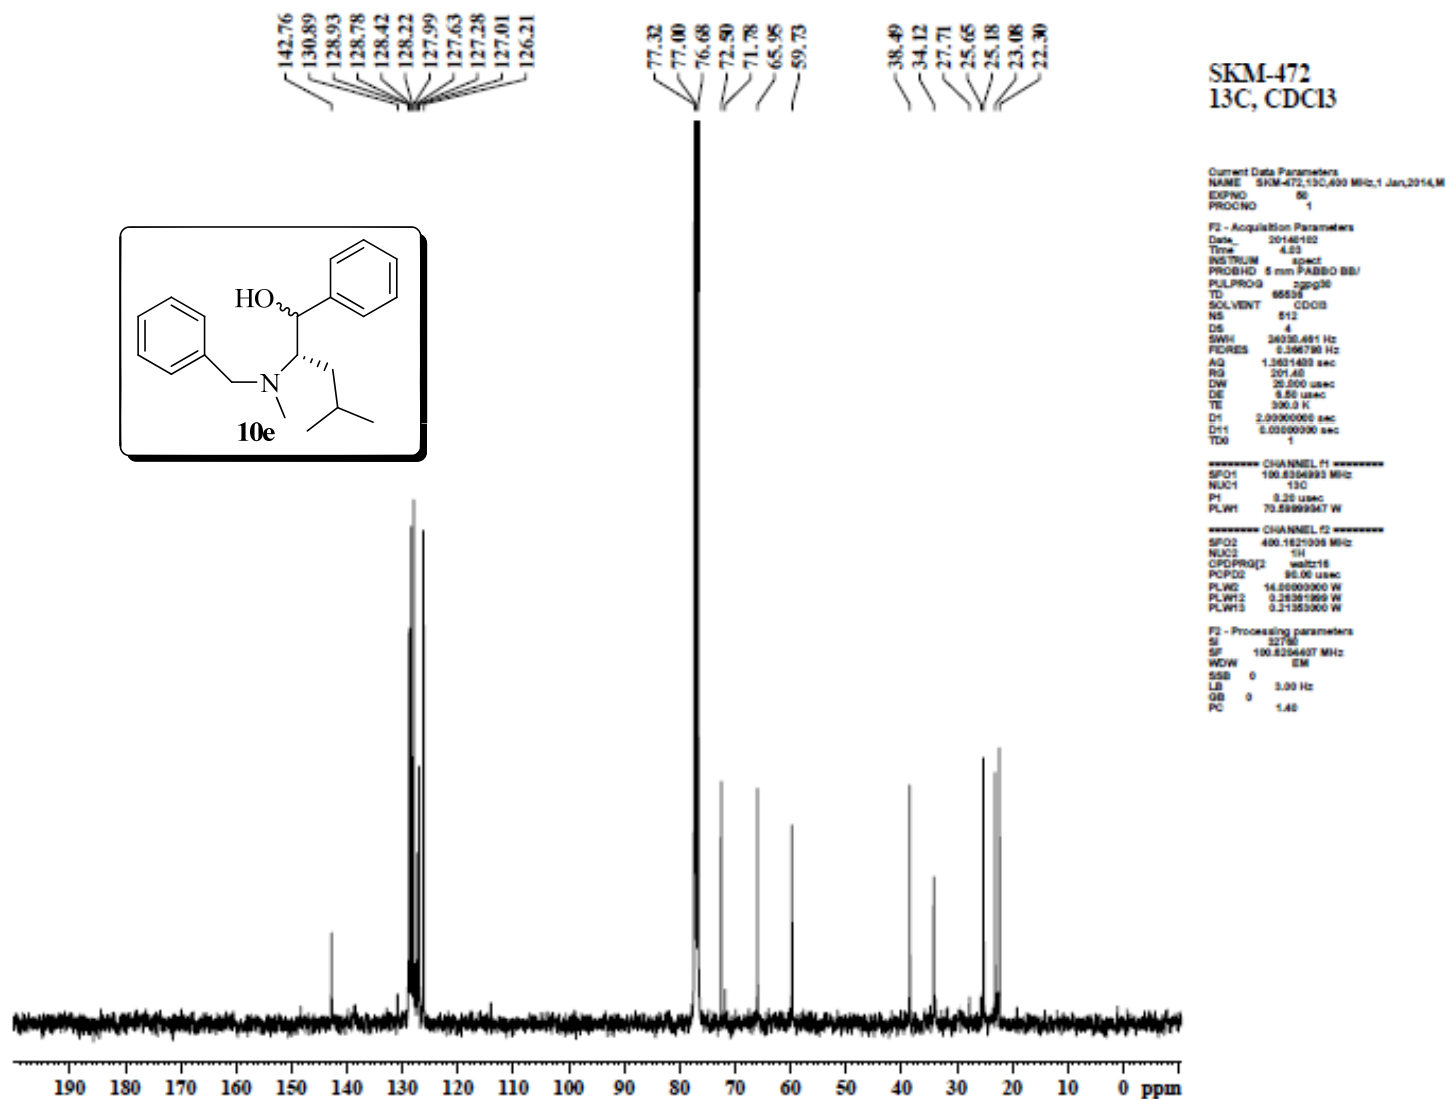

**Figure 72:**  $^{13}\text{C}$  -NMR Spectrum of **10e**.

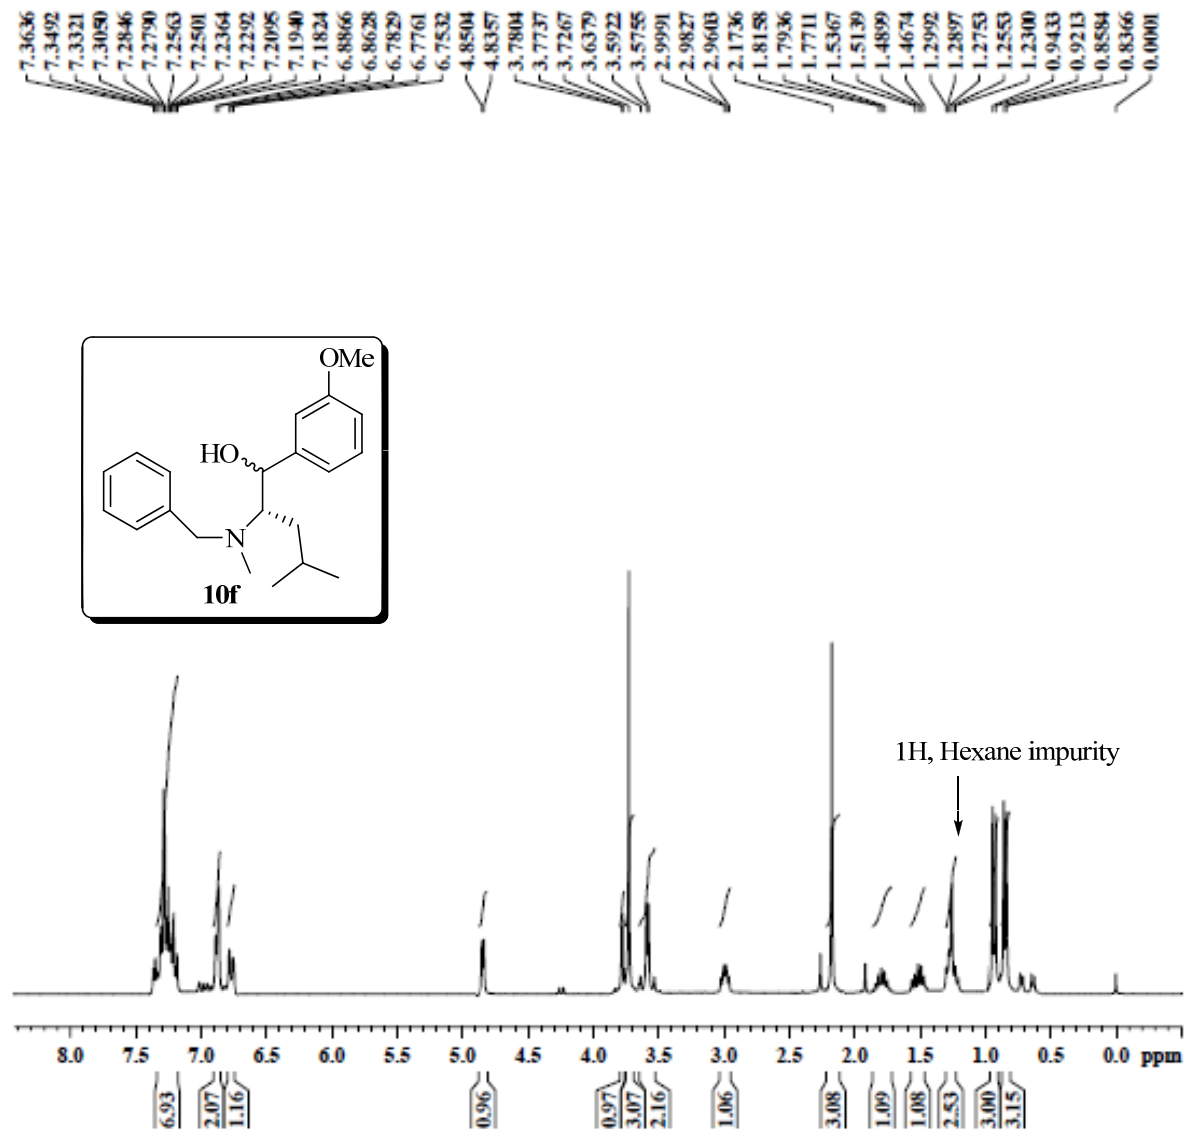

SKM-471  
1H,CDC13

Current Data Parameters  
NAME SKM-471, 1H, 300 MHz, 27 Sep, 2012, M  
EXPNO 330  
PROCNO 1

F2 - Acquisition Parameters  
Date\_ 20120927  
Time 13:07  
INSTRUM spect  
PROBHD 5 mm QNP 1H/13  
PULPROG zg30  
TD 66536  
SOLVENT CDCl3  
NS 8  
DS 0  
SWH 0100.119 Hz  
FIDRES 0.054423 Hz  
AQ 5.2953086 sec  
RG 90.5  
CW 93.900 usec  
DE 15.00 usec  
TE 273.2 K  
D1 1.00000000 sec  
TD0 1

===== CHANNEL f1 =====  
NUC1 13C  
P1 10.00 usec  
PL1 -1.00 dB  
PL1W 15.00001871 W  
SFO1 300.131834 MHz

F2 - Processing parameters  
SI 32768  
SF 300.1300198 MHz  
WDW EM  
SSB 0  
LB 0.30 Hz  
GB 0  
PC 1.00

Figure 73:  $^1\text{H}$ -NMR Spectrum of **10f**.

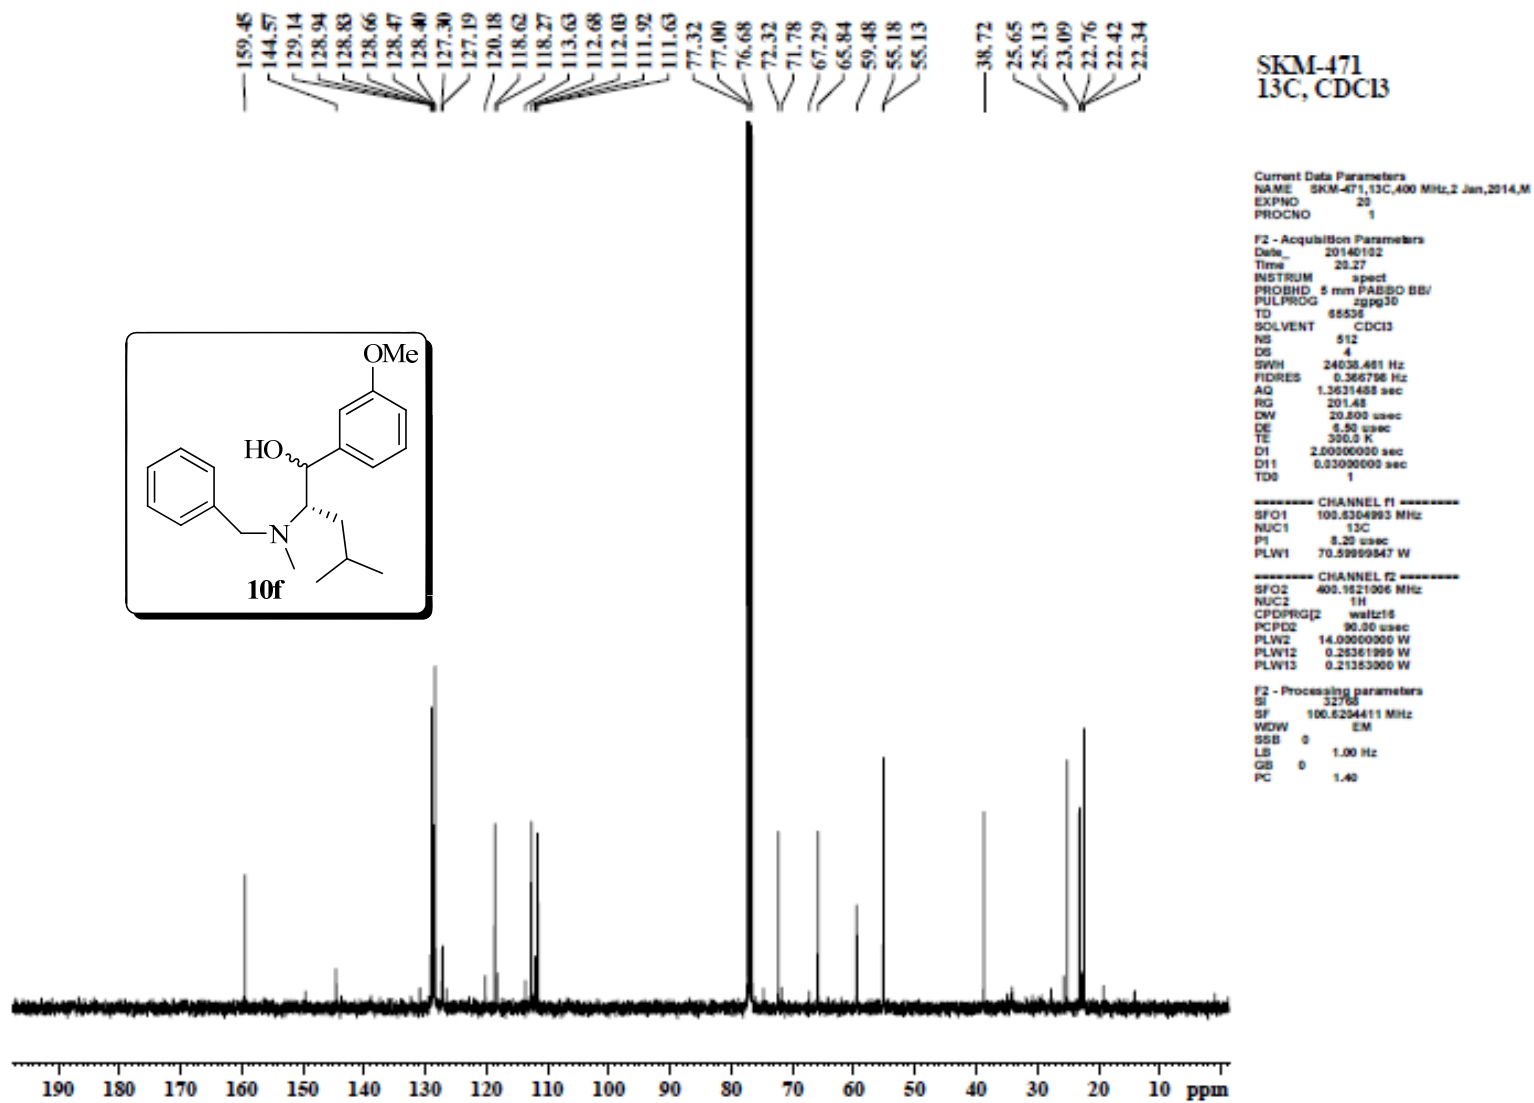

**Figure 74:**  $^{13}\text{C}$  -NMR Spectrum of **10f**.

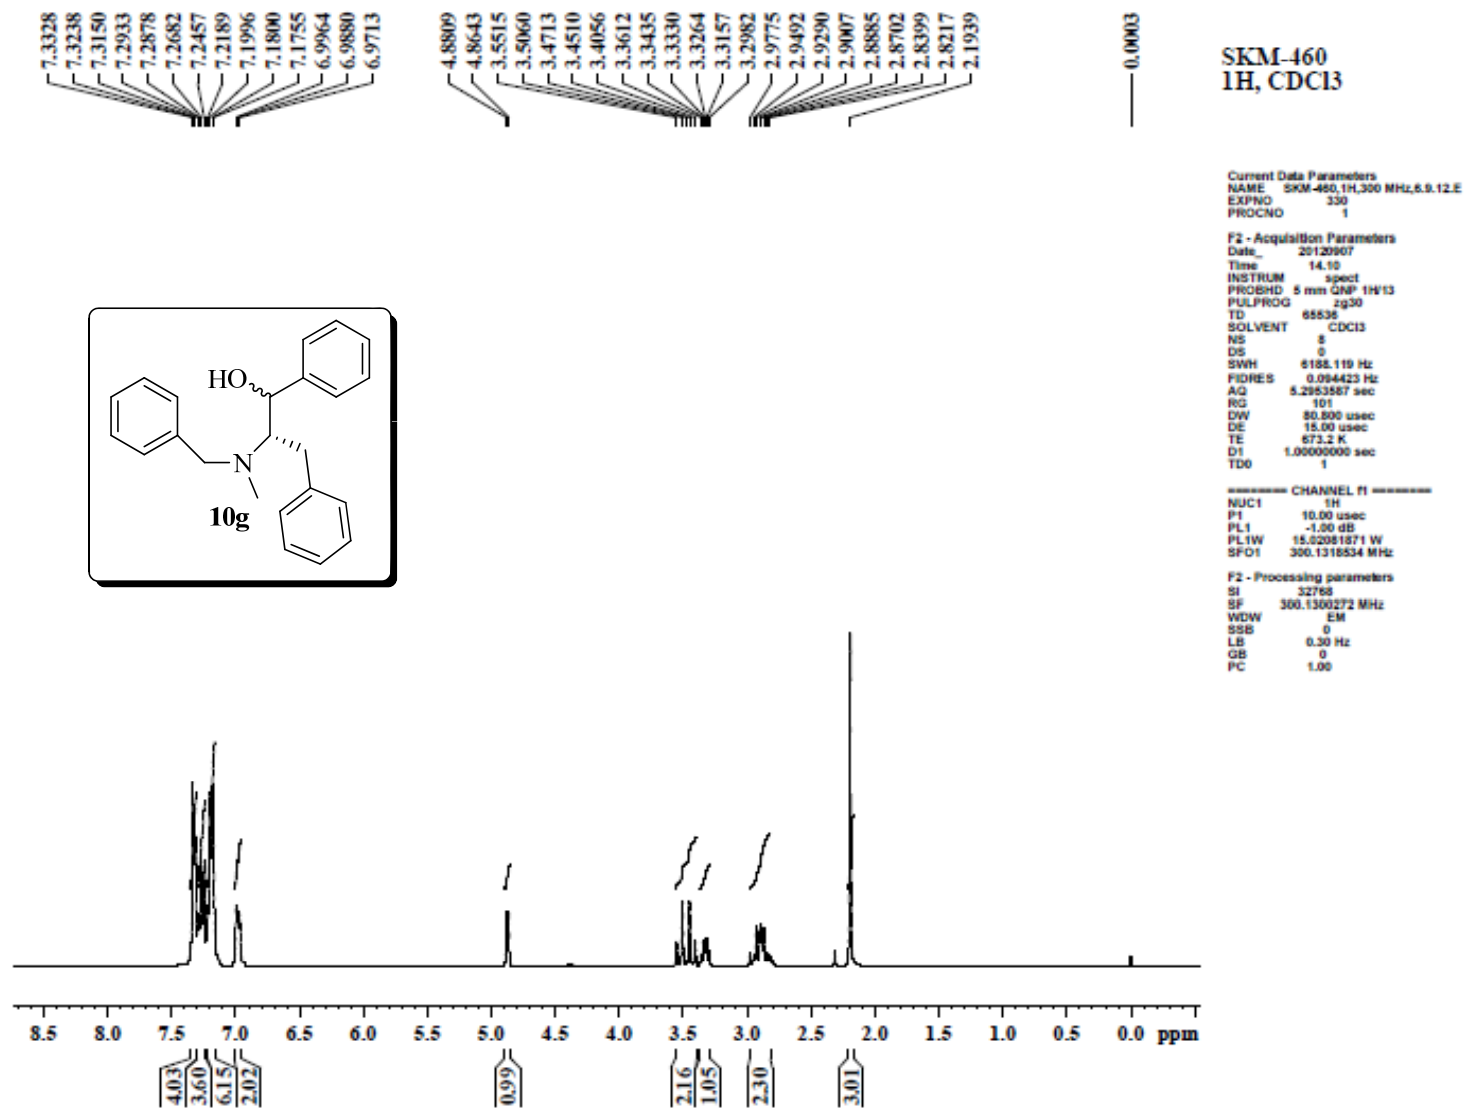

**Figure 75:**  $^1\text{H}$ -NMR Spectrum of **10g**.

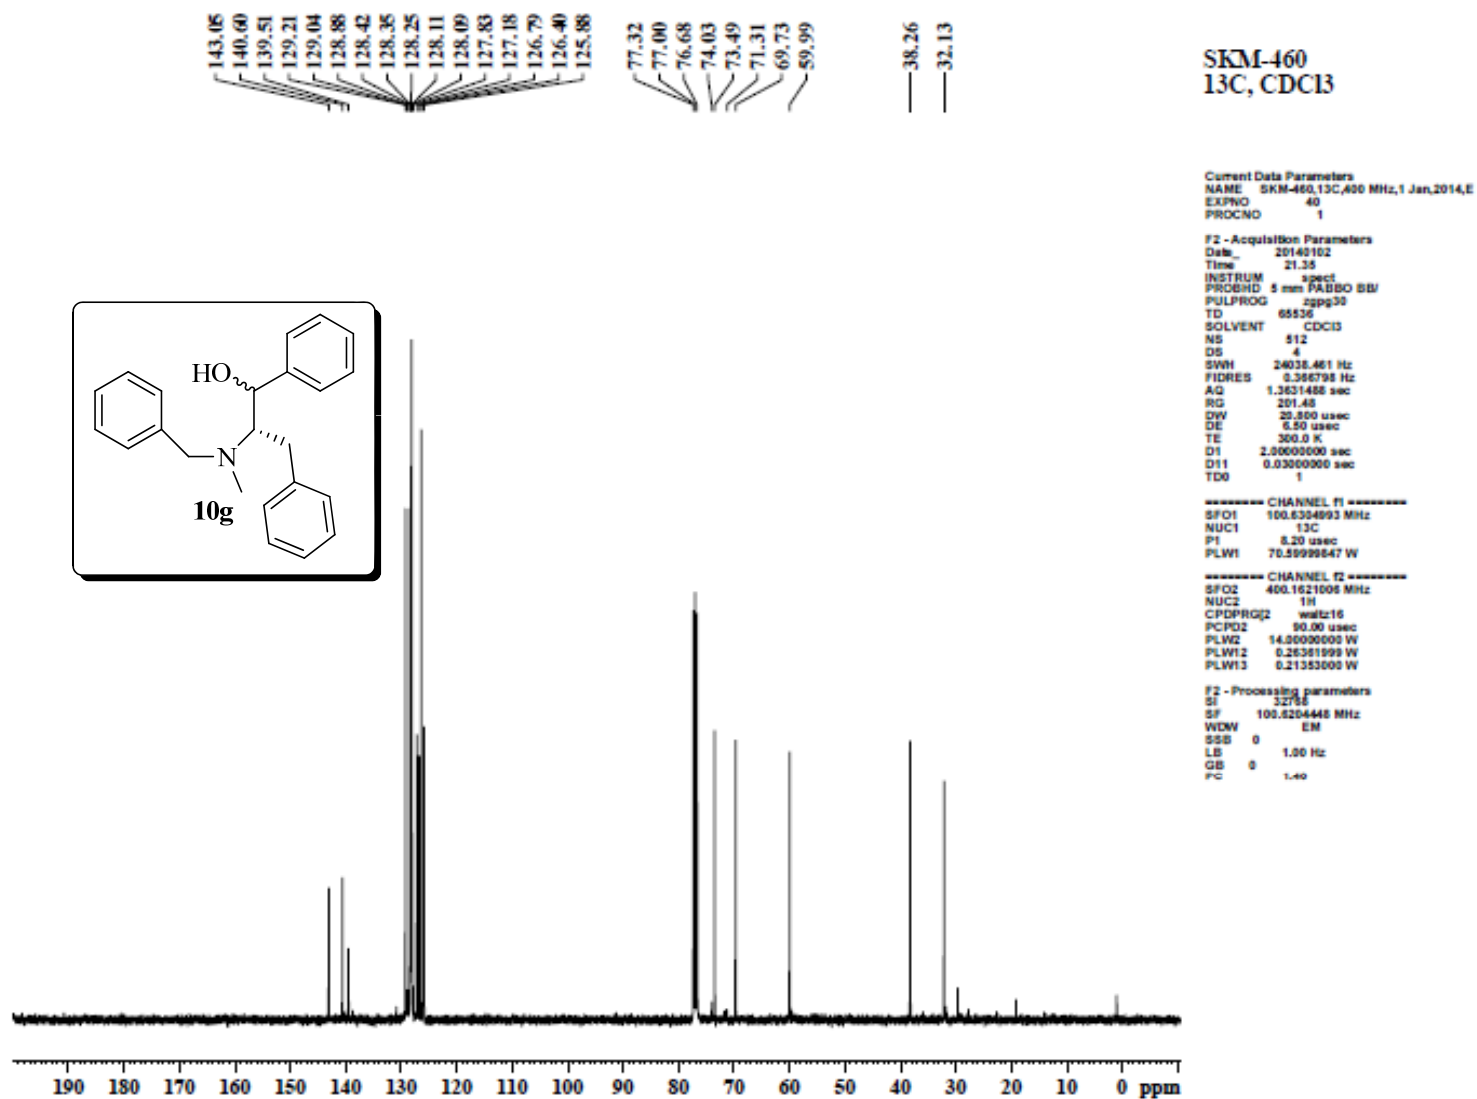

**Figure 76:**  $^{13}\text{C}$  -NMR Spectrum of **10g**.



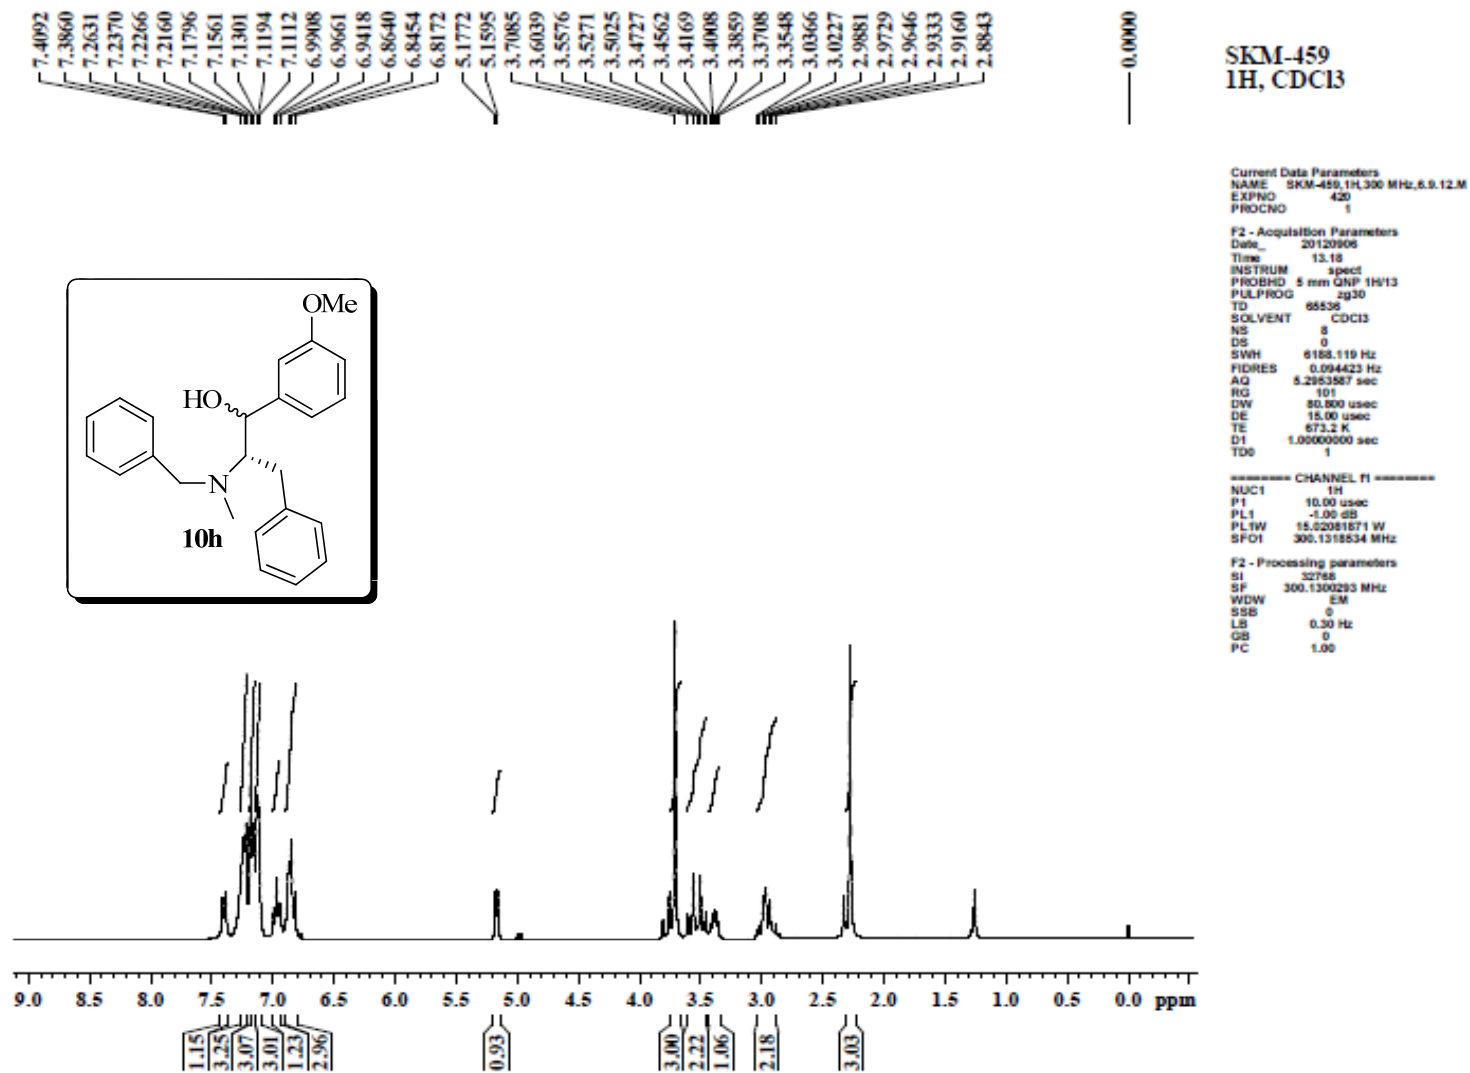

**Figure 77:  $^1\text{H}$ -NMR Spectrum of **10h**.**

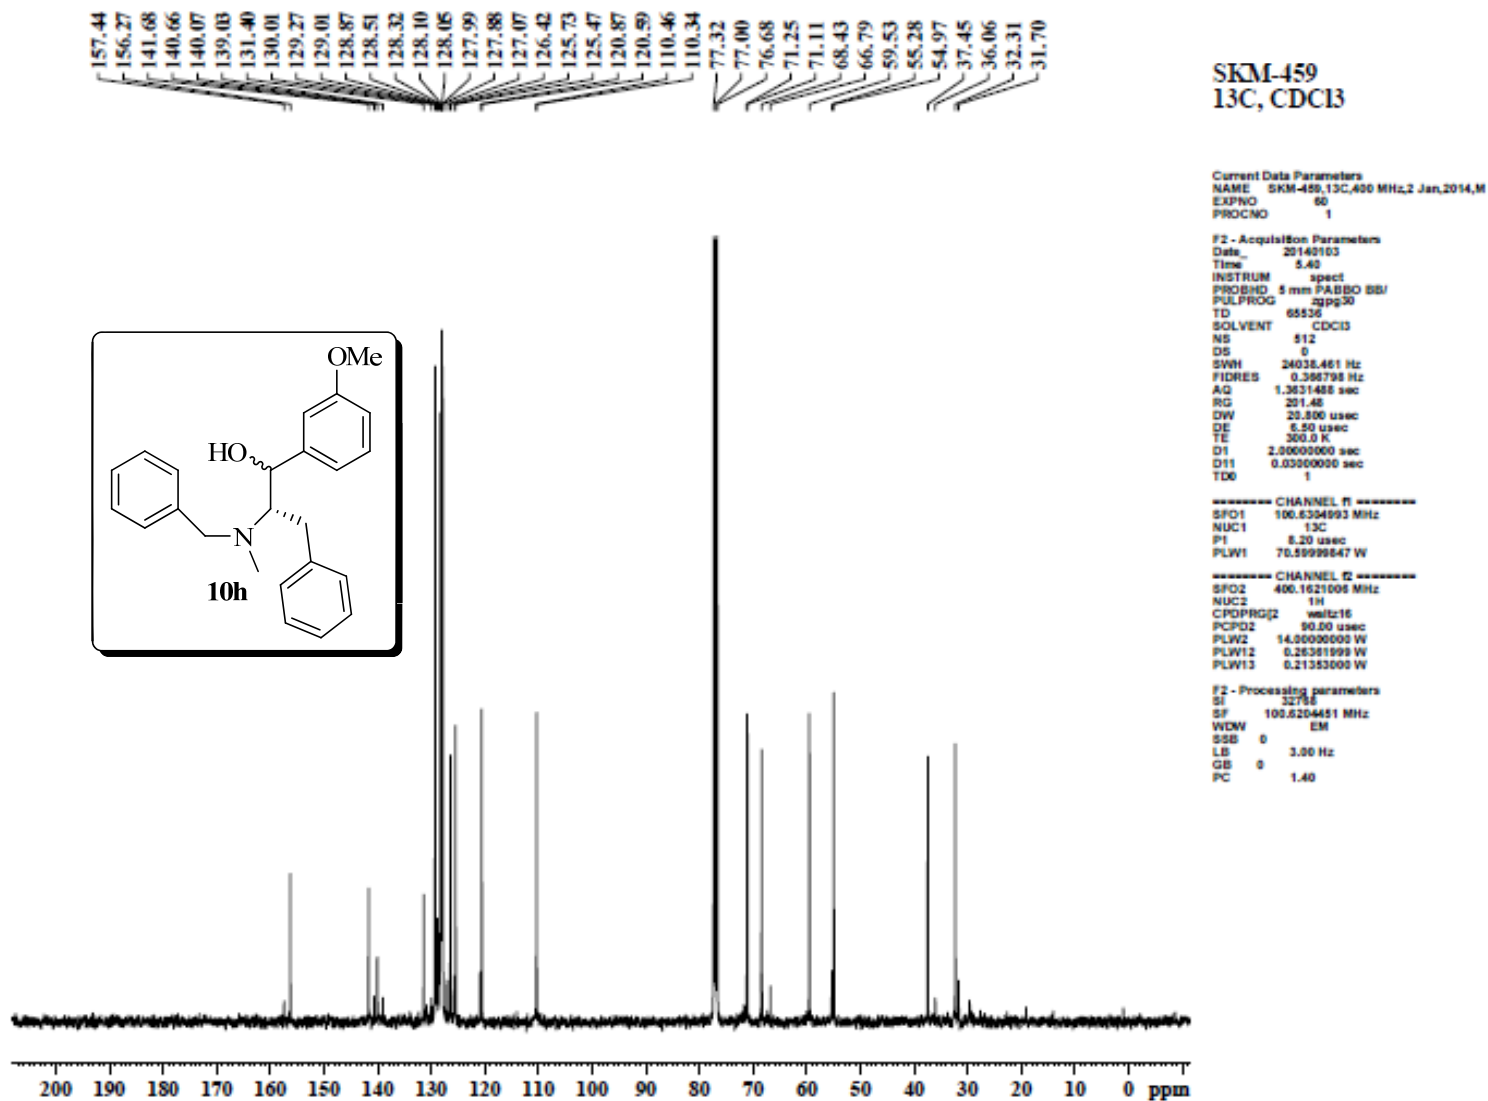

Figure 78:  $^{13}\text{C}$  -NMR Spectrum of **10h**.

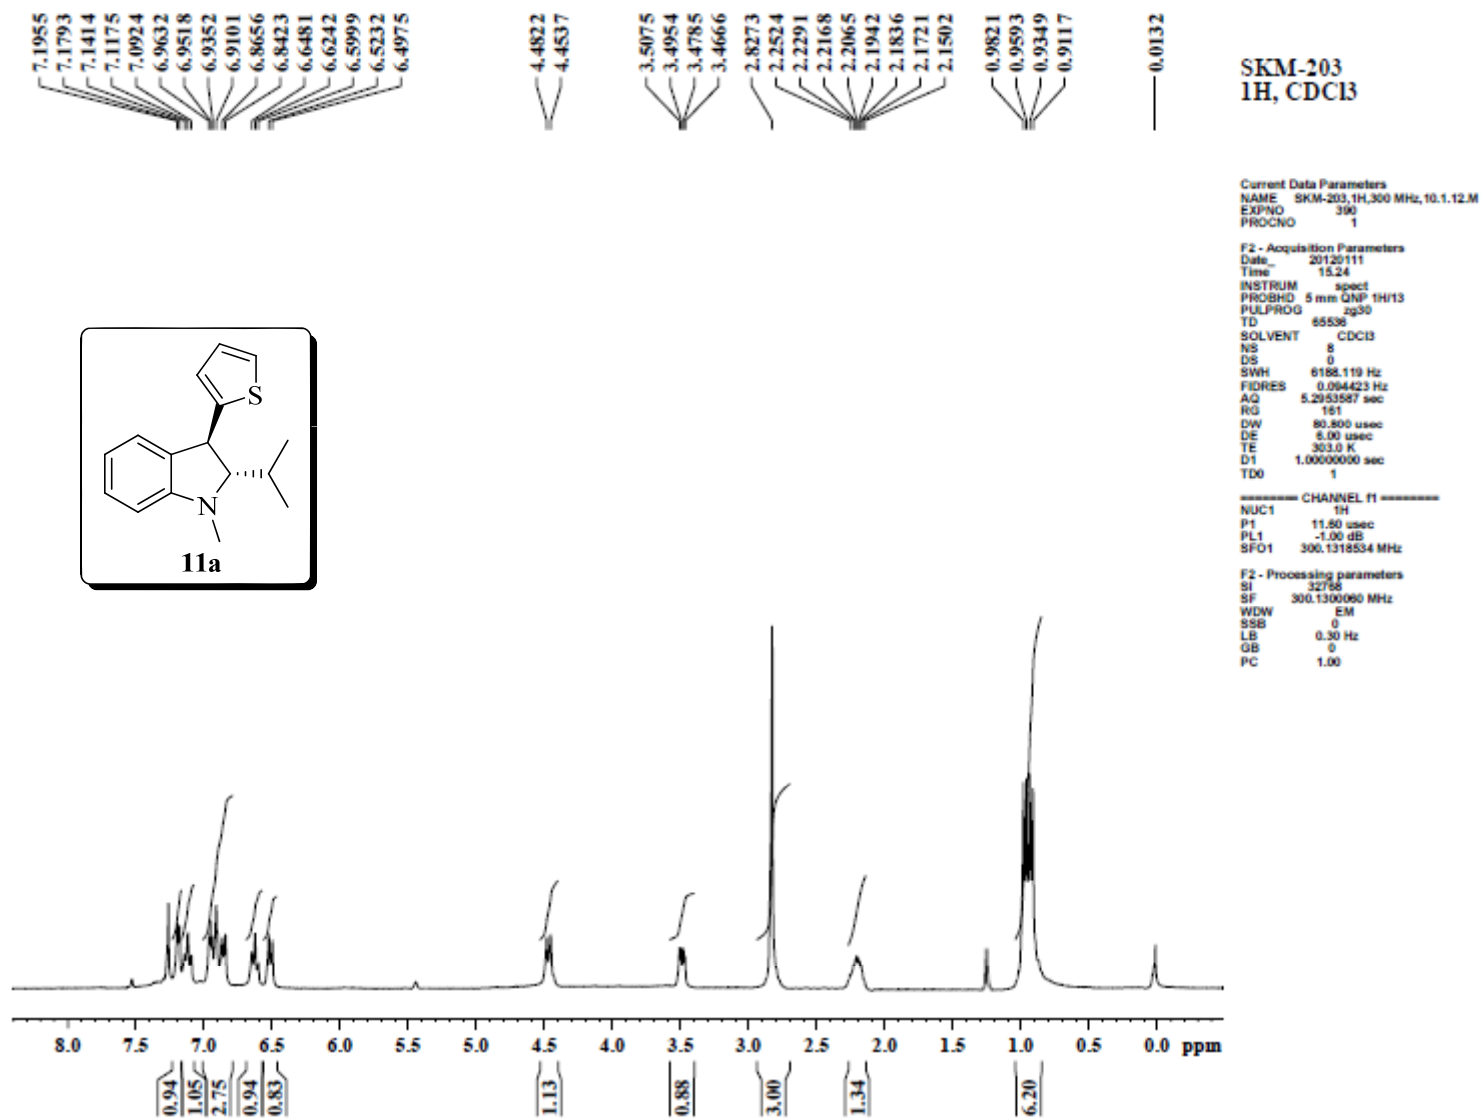

**Figure 79:**  $^1\text{H}$ -NMR Spectrum of **11a**.

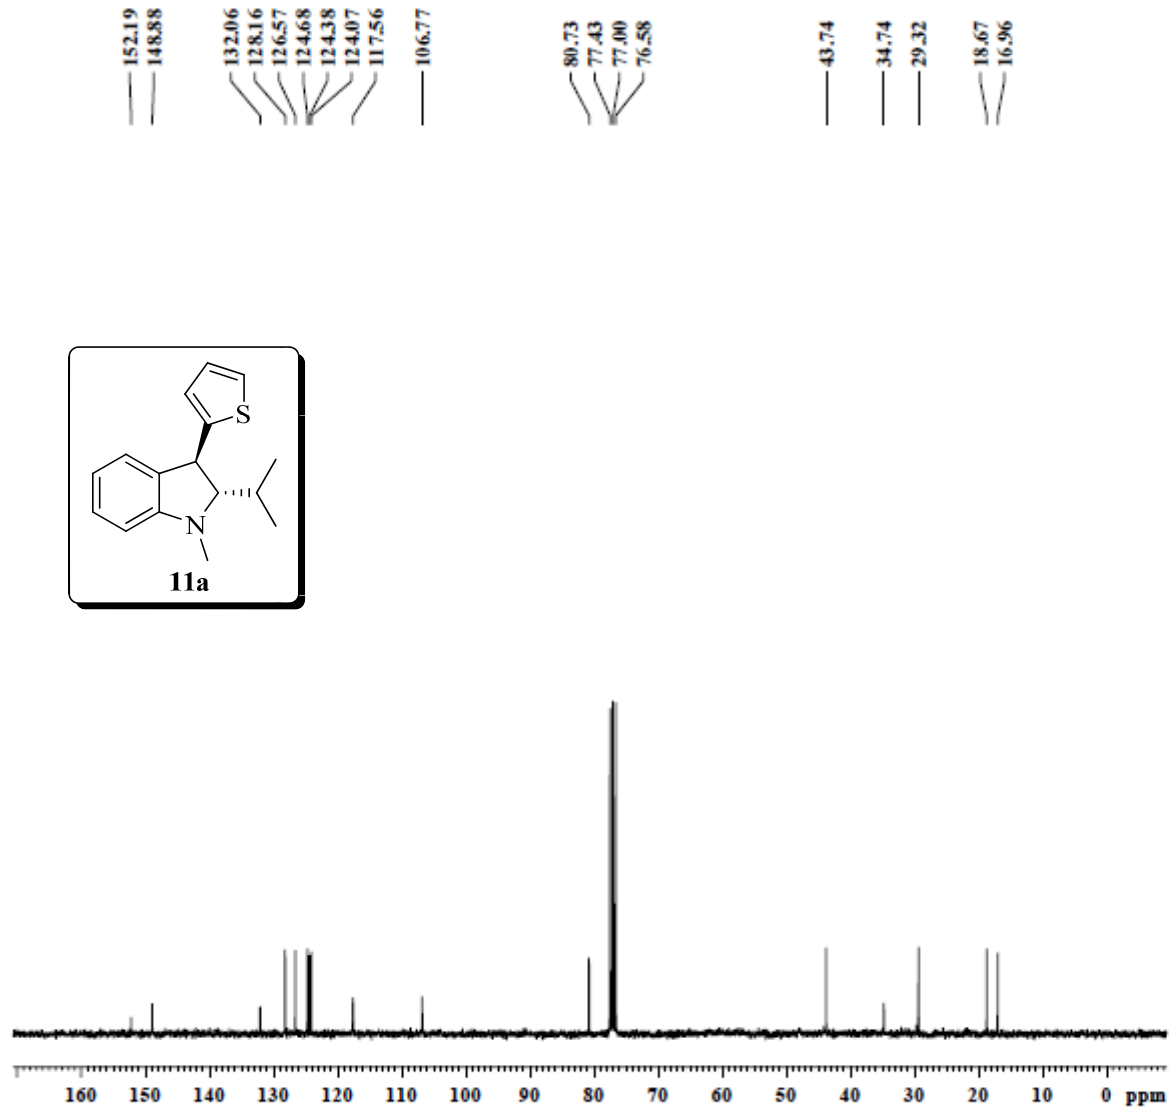

SKM-203  
13C, CDCl3

Current Data Parameters  
NAME SKM-203,13C,300 MHz,28.7.  
EXPNO 620  
PROCNO 1

F2 - Acquisition Parameters  
Date\_ 20110731  
Time 6.48  
INSTRUM spect  
PROBHD 5 mm GNP 1H/13  
PULPROG zgpg30  
TD 66638  
SOLVENT CDCl3  
NS 612  
DS 4  
SWH 18028.848 Hz  
FIDRES 0.276098 Hz  
AQ 1.8175818 sec  
RG 32788  
DW 27.733 usec  
DE 8.00 usec  
TE 298.2 K  
D1 2.0000000 sec  
d11 0.0300000 sec  
DELTA 1.8888888 sec  
TD0 1

===== CHANNEL f1 =====  
NUC1 13C  
P1 8.70 usec  
PL1 -3.00 dB  
SFO1 76.4752963 MHz

===== CHANNEL f2 =====  
CPDPRG2 waltz16  
NUC2 1H  
PCPD2 80.00 usec  
PL2 -1.00 dB  
PL12 17.00 dB  
PL13 21.00 dB  
SFO2 300.1312006 MHz

F2 - Processing parameters  
SI 32788  
SF 76.4677617 MHz  
WDW EM  
SSB 0  
LB 1.00 Hz  
GB 0

Figure 80:  $^{13}\text{C}$  -NMR Spectrum of **11a**.

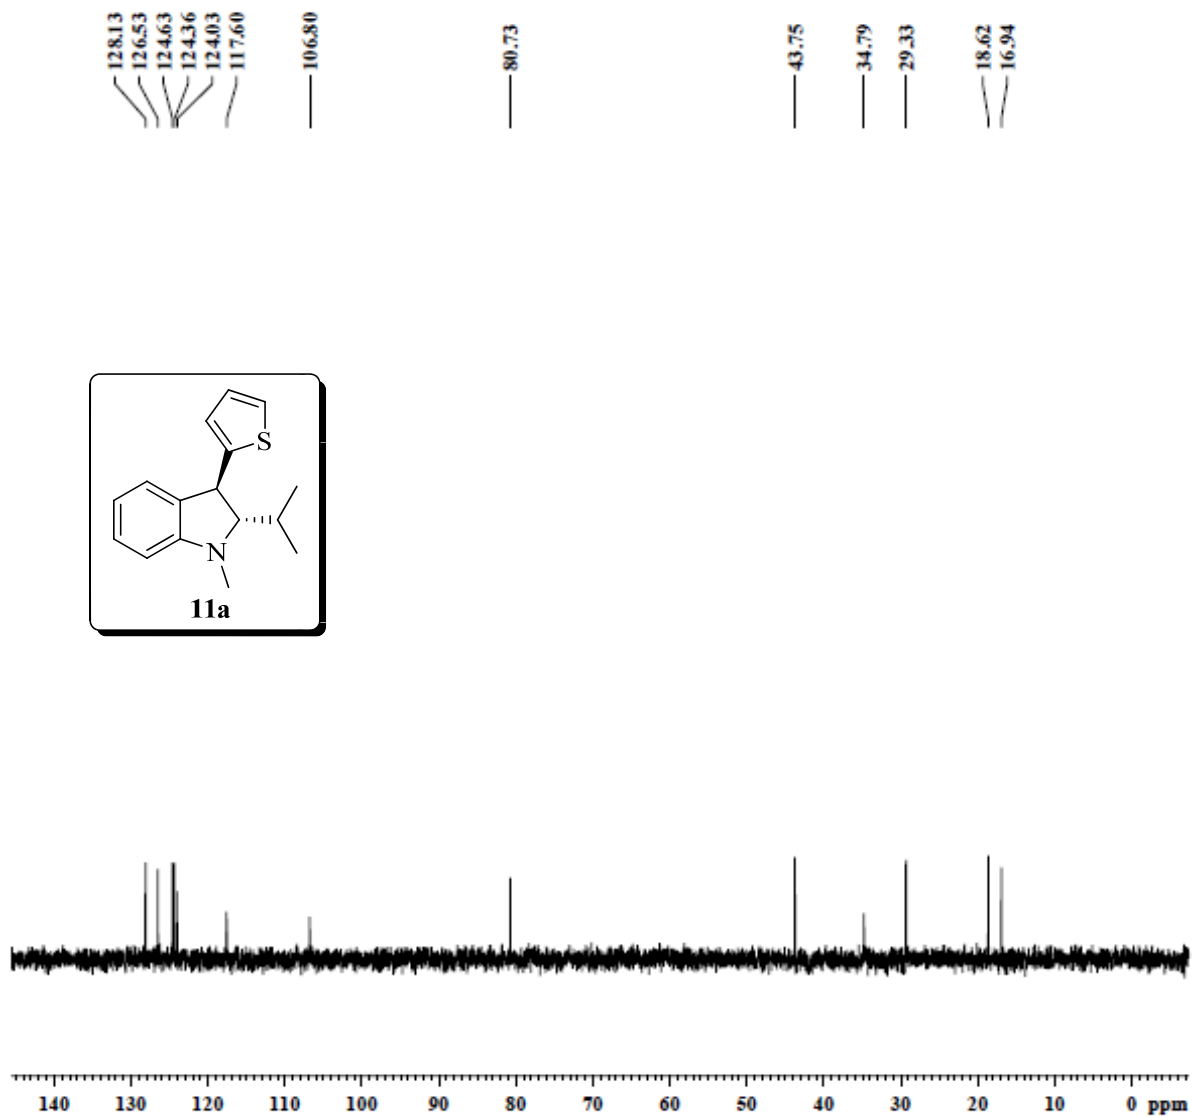

SKM-203  
DEPT-1,CDCI3

Current Data Parameters  
NAME SKM-203.DEPT-1,300 MHz.20.1.12.M  
EXPNO 350  
PROCNO 1

F2 - Acquisition Parameters  
Date\_ 20120120  
Time 20.42  
INSTRUM spect  
PROBHD 5 mm QNP 1H/13  
PULPROG dept138  
TD 66536  
SOLVENT CDCl3  
NS 256  
DS 4  
SWH 18028.846 Hz  
FIDRES 0.275098 Hz  
AQ 1.6175818 sec  
RG 3269  
DW 27.733 usec  
DE 6.00 usec  
TE 303.0 K  
CNST2 148.0000000  
D1 2.00000000 sec  
d2 0.00544828 sec  
d12 0.00002000 sec  
DELTA 0.00001108 sec  
TDO 1

===== CHANNEL f1 =====  
NUC1 13C  
P1 8.70 usec  
p2 17.40 usec  
PL1 -3.00 dB  
SFO1 75.4752853 MHz

===== CHANNEL f2 =====  
CPDPRG2 waltz16  
NUC2 1H  
P3 11.80 usec  
p4 23.20 usec  
PCPD2 80.00 usec  
PL2 -1.00 dB  
PL12 17.00 dB  
SFO2 300.1312005 MHz

F2 - Processing parameters  
SI 32768  
SF 75.4677536 MHz  
WDW EM  
SSB 0  
LB 1.00 Hz  
GB 0  
PC 1.40

Figure 81: DEPT-I -Spectrum of **11a**.

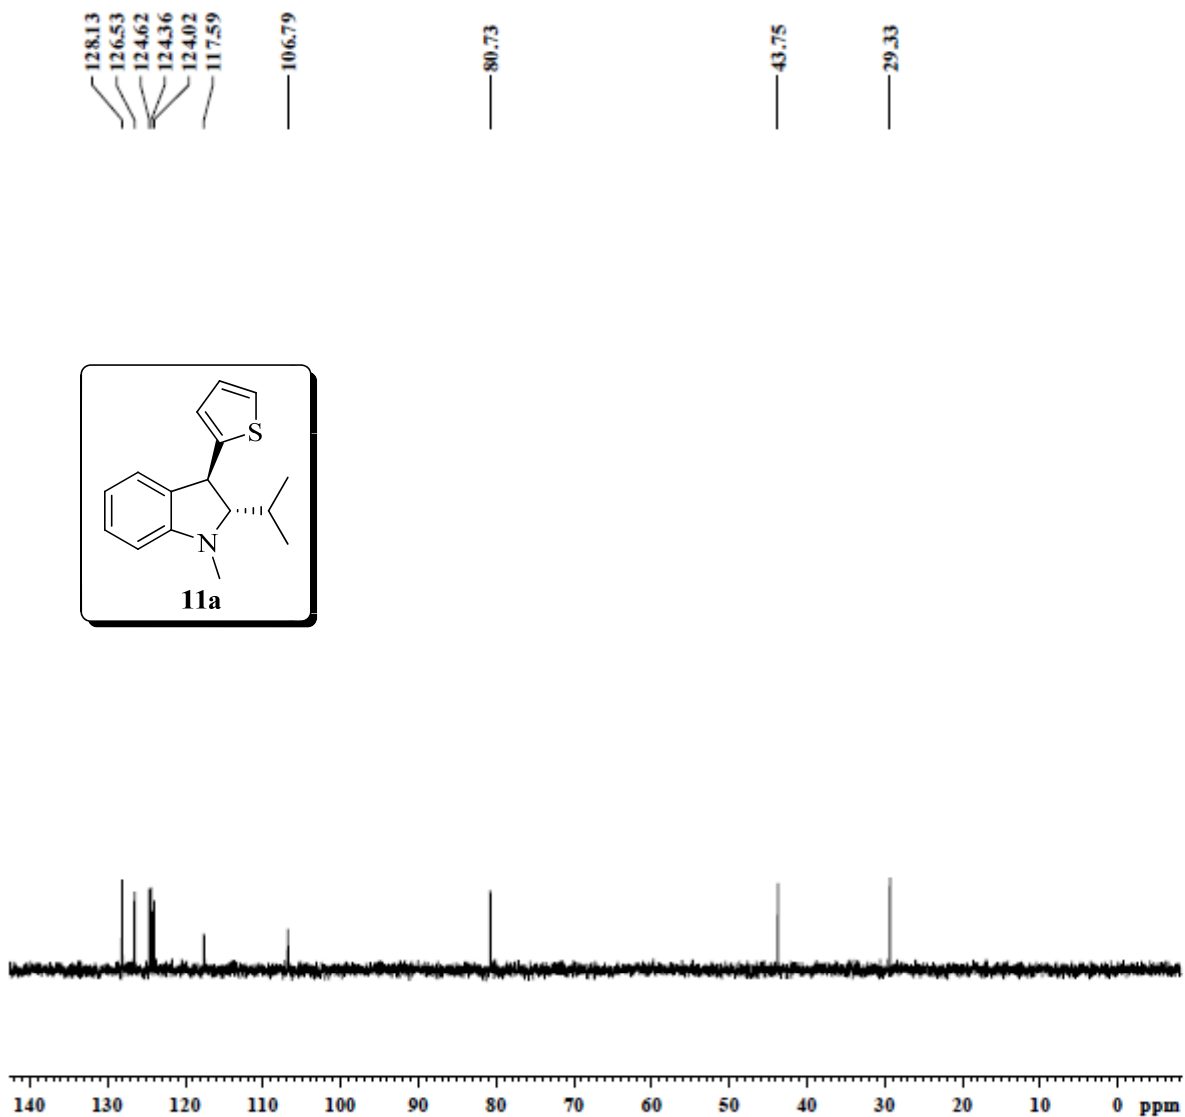

SKM-203  
DEPT-II, CDC13

```

Current Data Parameters
NAME SKM-203_DEPT-4,300 MHz,20, 1,12,M
EXPNO 361
PROCNO 1

F2 - Acquisition Parameters
Date_ 20120123
Time 21.00
INSTRUM spect
PROBHD 5 mm QNP 1H/13
PULPROG zgpg30
TD 66636
SOLVENT CDCl3
NS 256
DS 4
SWH 19828.846 Hz
FIDRES 0.275938 Hz
AQ 1.8176218 sec
RG 2099
DW 27.733 usec
DE 6.00 usec
TE 303.0 K
CHST2 145.3000000
d1 2.0000000 sec
d2 0.00344028 sec
d12 0.00002000 sec
DELTA 0.00001108 sec
TD0 1

===== CHANNEL f1 =====
NUC1 13C
P1 8.70 usec
p2 17.40 usec
PL1 -3.00 dB
SFO1 76.4782853 MHz

===== CHANNEL f2 =====
CPDPRG2 waltz16
NUC2 1H
P3 11.60 usec
p4 23.20 usec
PCPD2 80.00 usec
PL2 -1.00 dB
PL12 17.00 dB
SFO2 300.1312005 MHz

F2 - Processing parameters
SI 32768
SF 76.4677538 MHz
WDW EM
SSB 0
LB 1.00 Hz
GB 8
PC 1.60

```

Figure 82: DEPT-II -Spectrum of **11a**.

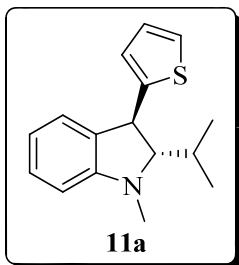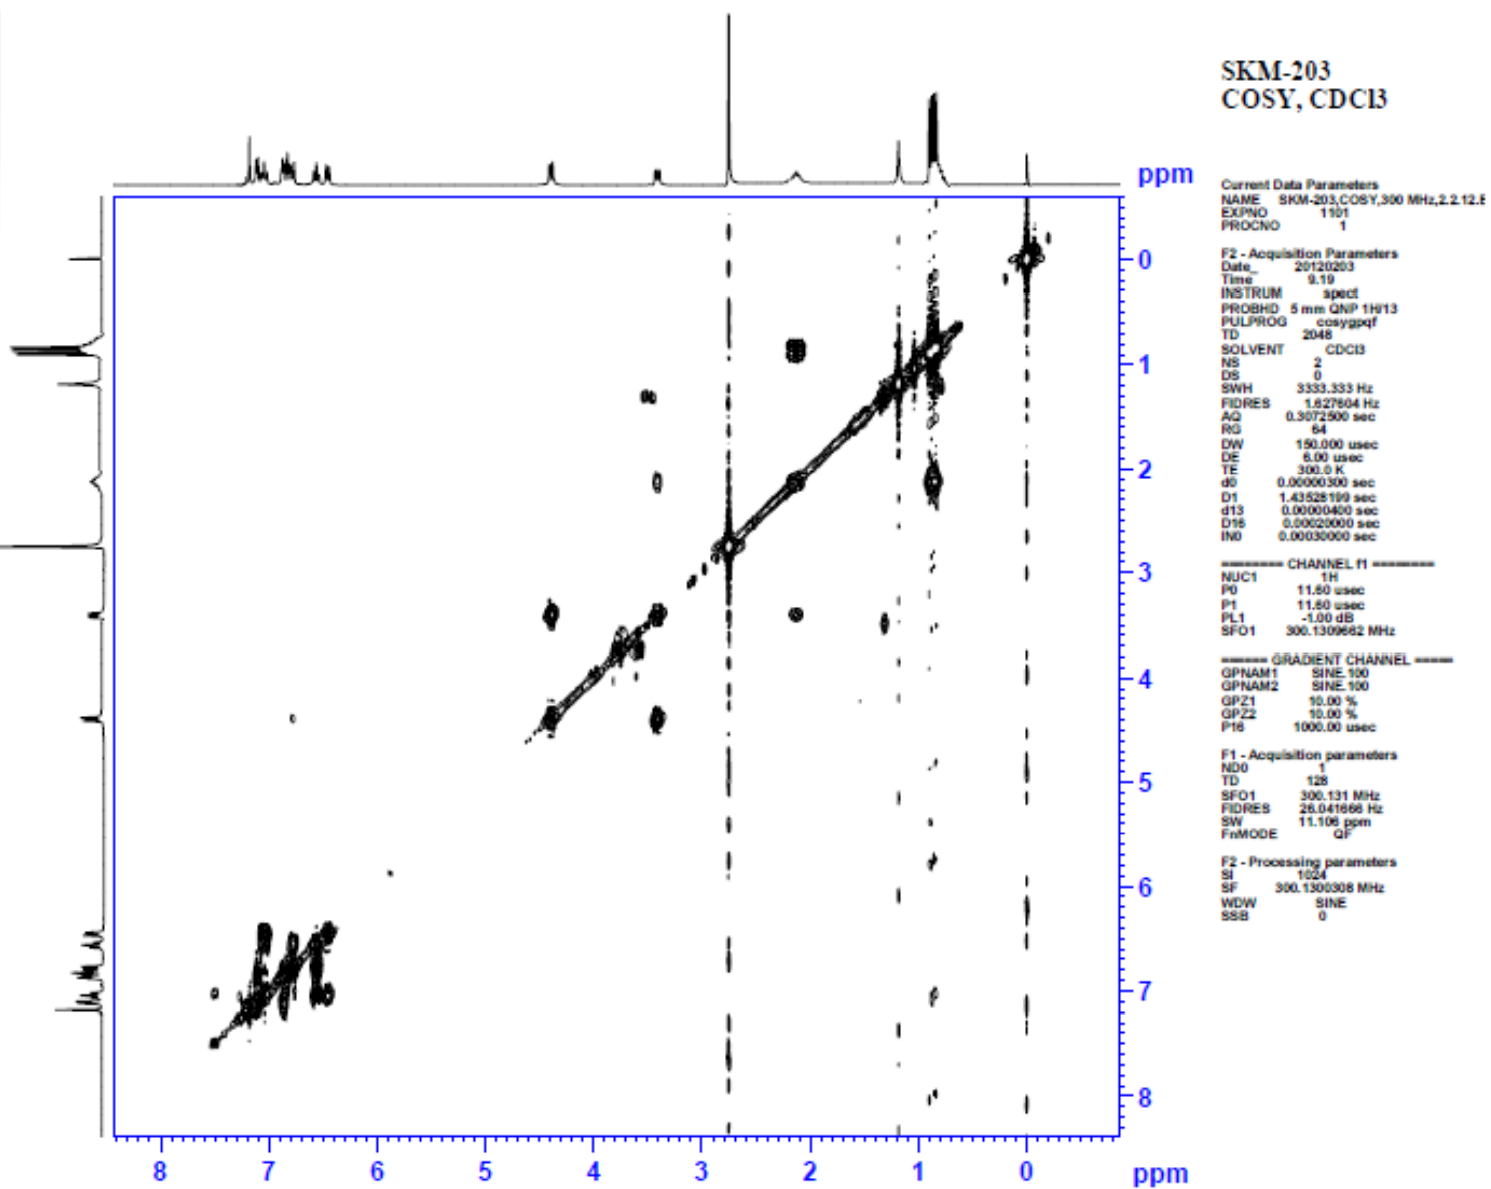

**Figure 83: COSY -Spectrum of 11a.**

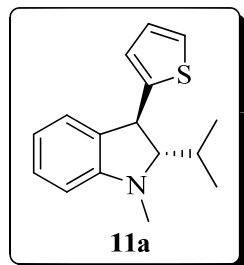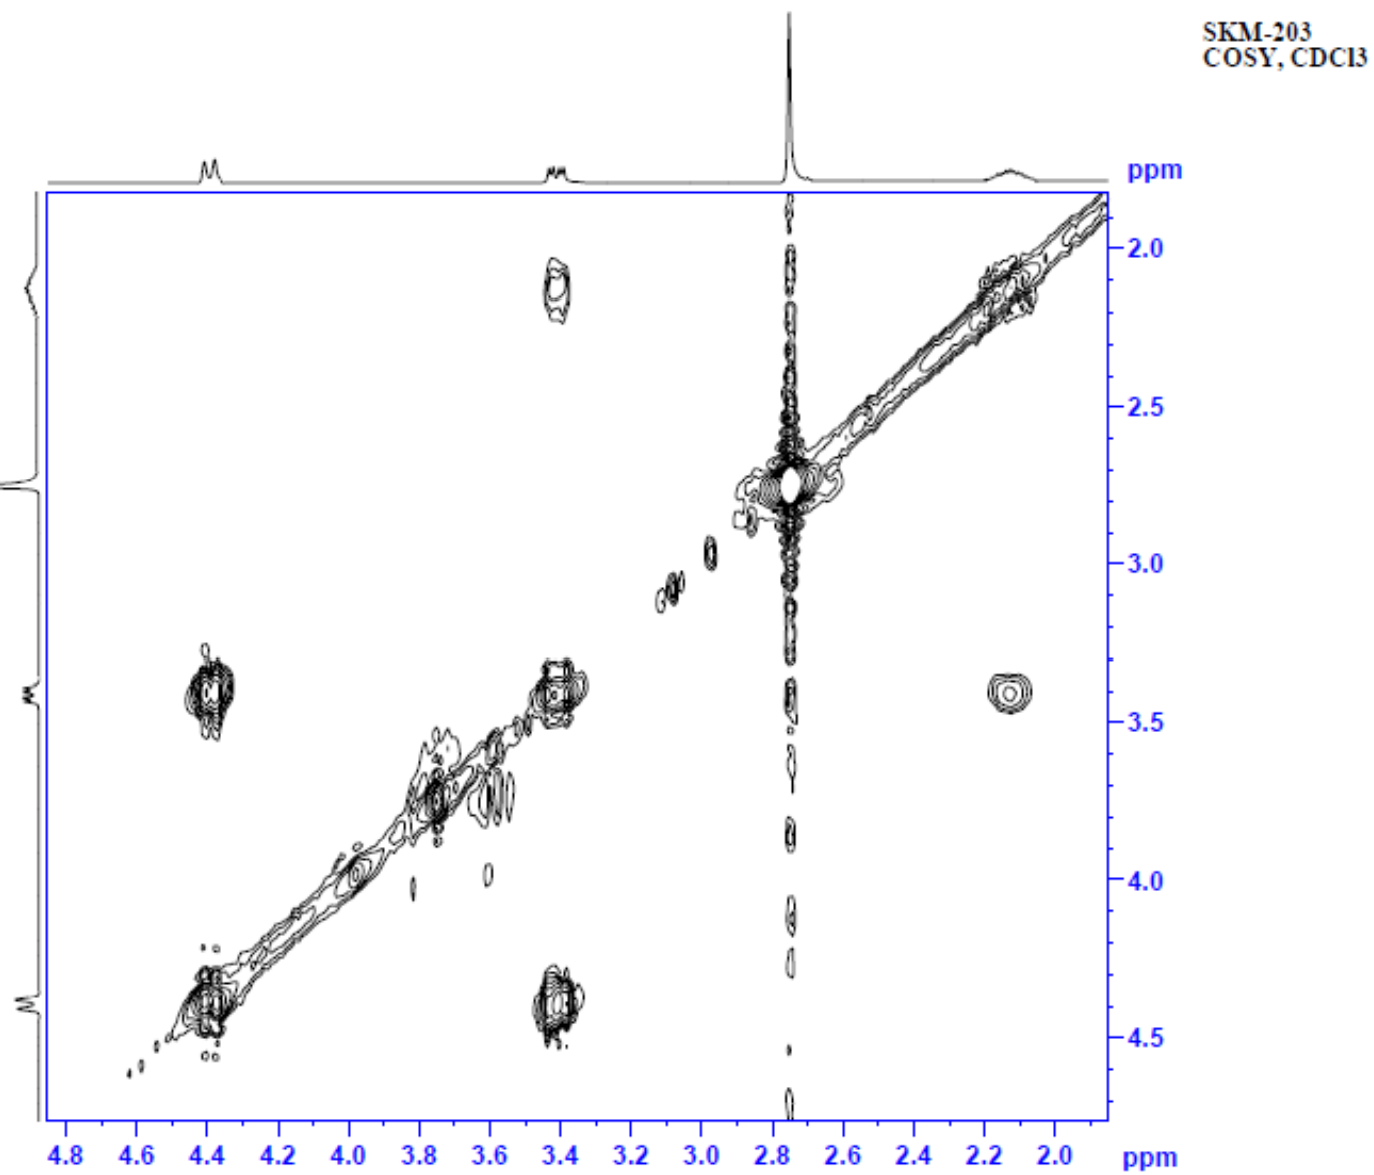

**Figure 84: COSY -Spectrum of 11a.**



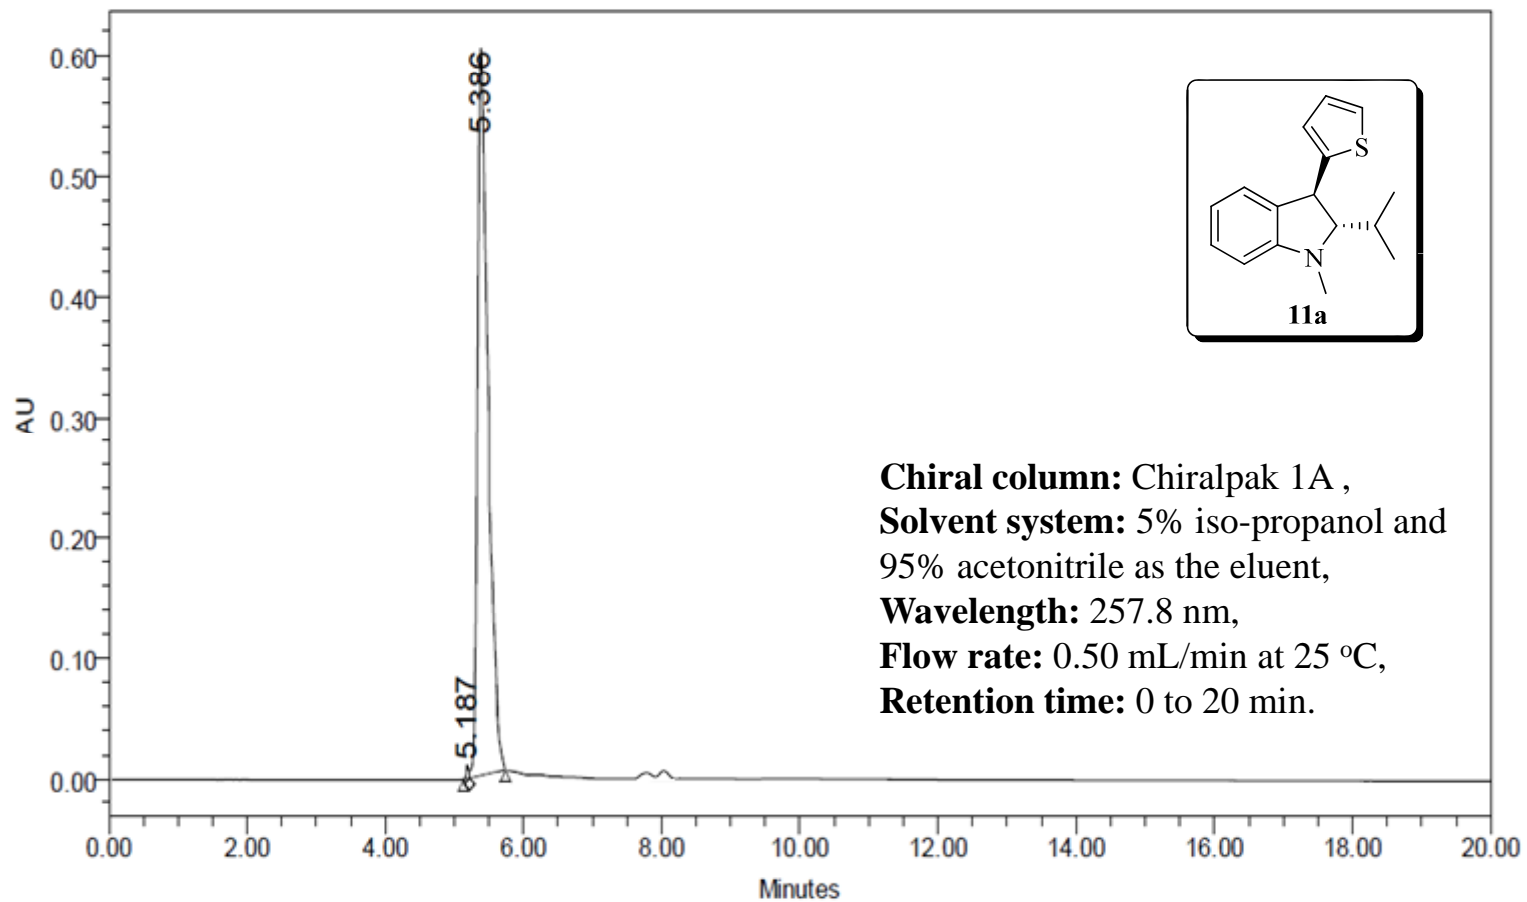

**Figure 85:** HPLC -Spectrum of **11a**.

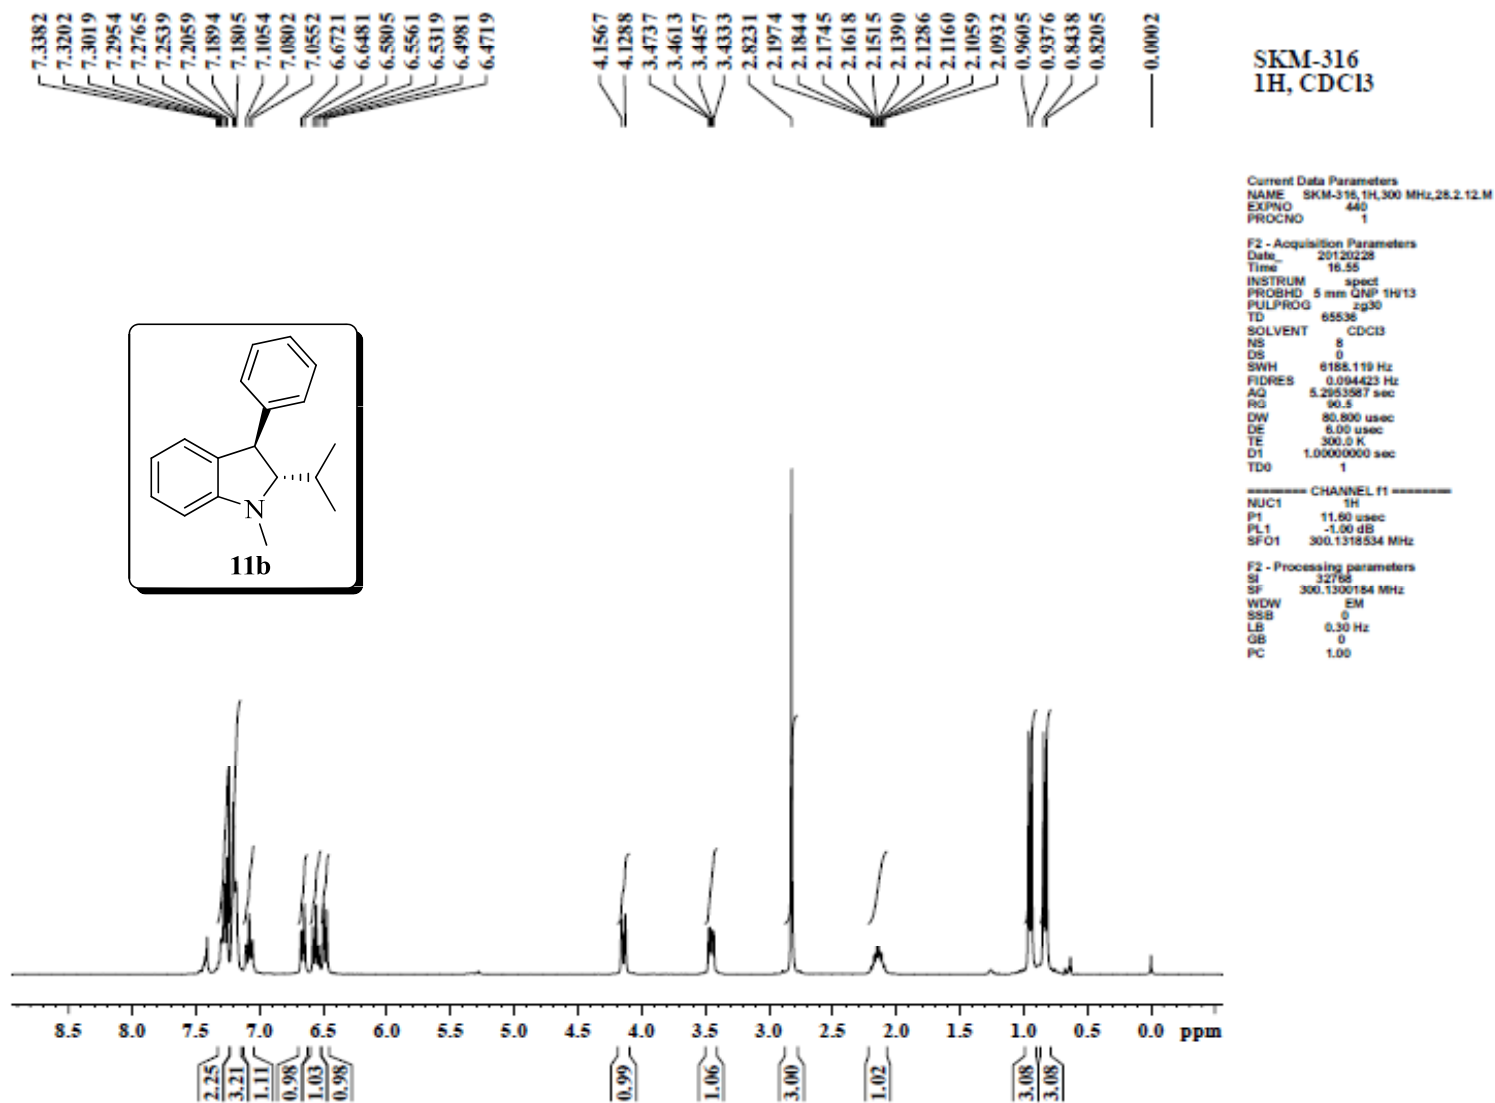

**Figure 86:** <sup>1</sup>H -NMR Spectrum of **11b**.

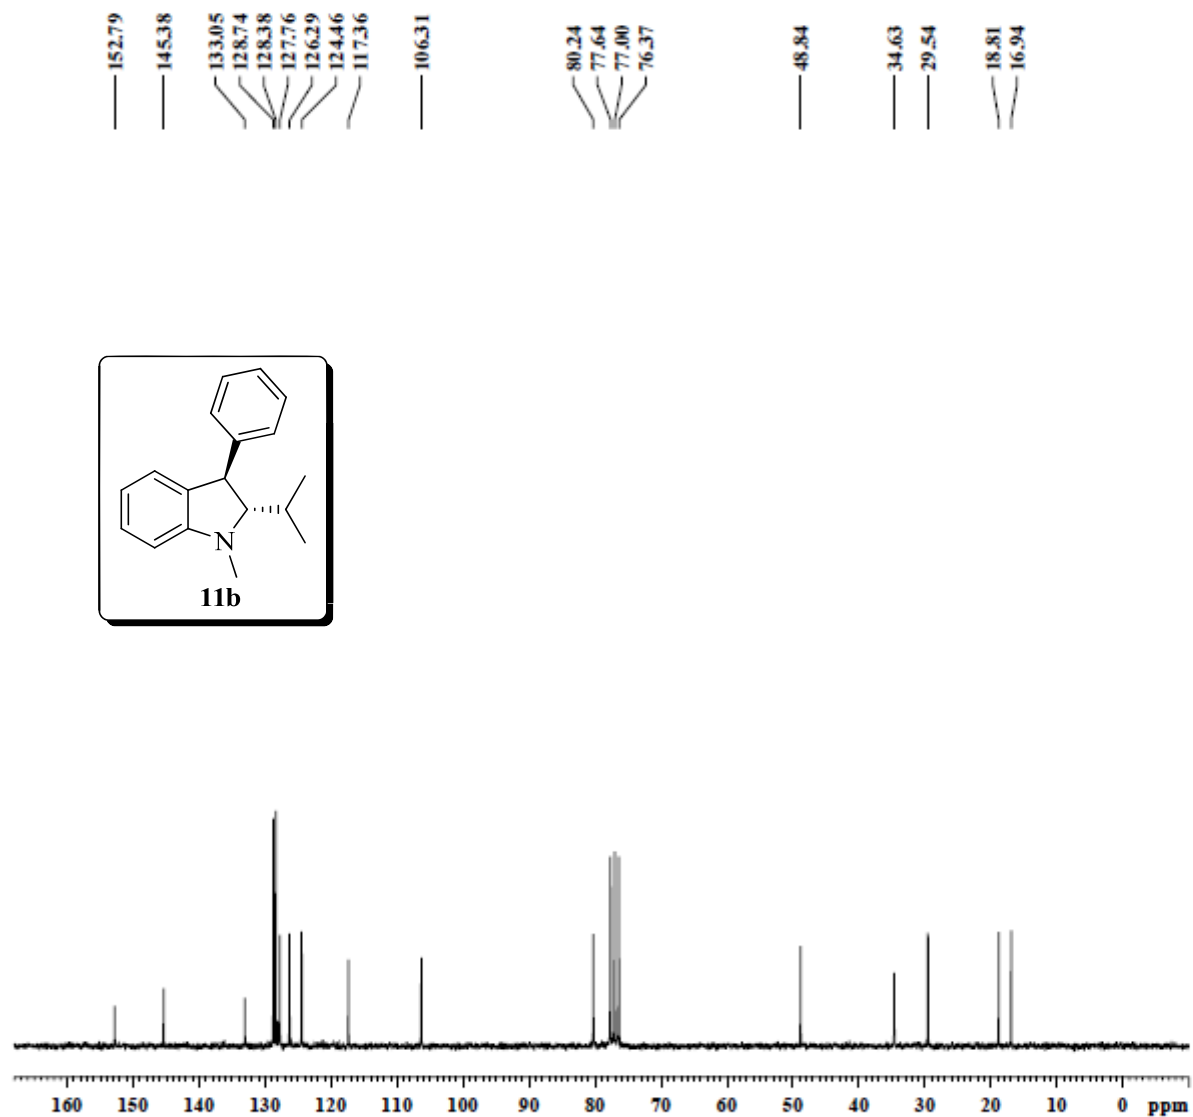

SKM-316  
13C, CDCl3

Current Data Parameters  
NAME SKM-316, 13C, 200 MHz, 1.3, 12.M  
EXPNO 340  
PROCNO 1

F2 - Acquisition Parameters  
Date\_ 20120830  
Time 13.38  
INSTRUM spect  
PROBHD 5 mm Dual 13C/  
PULPROG zgpg30  
TD 65536  
SOLVENT CDCl3  
NS 627  
DS 4  
SWH 11990.407 Hz  
FIDRES 0.162959 Hz  
AQ 2.7329011 sec  
RG 40.3  
DW 41.700 usec  
DE 6.00 usec  
TE 0.0 K  
D1 2.0000000 sec  
d11 0.03000000 sec  
DELTA 1.80000000 sec  
MCREST 0.00000000 sec  
MCWRR 0.01500000 sec

===== CHANNEL f1 =====  
NUC1 13C  
P1 6.30 usec  
PL1 -6.00 dB  
SFO1 50.3277608 MHz

===== CHANNEL f2 =====  
CPDPRG2 waltz16  
NUC2 1H  
PCPD2 100.00 usec  
PL2 -4.00 dB  
PLT2 18.00 dB  
PLT3 22.00 dB  
SFO2 200.1308005 MHz

F2 - Processing parameters  
SI 32768  
SF 50.3227313 MHz  
WDW EM  
SSB 0  
LB 1.00 Hz  
GB 0  
PC 1.40

Figure 87:  $^{13}\text{C}$  -NMR Spectrum of **11b**.

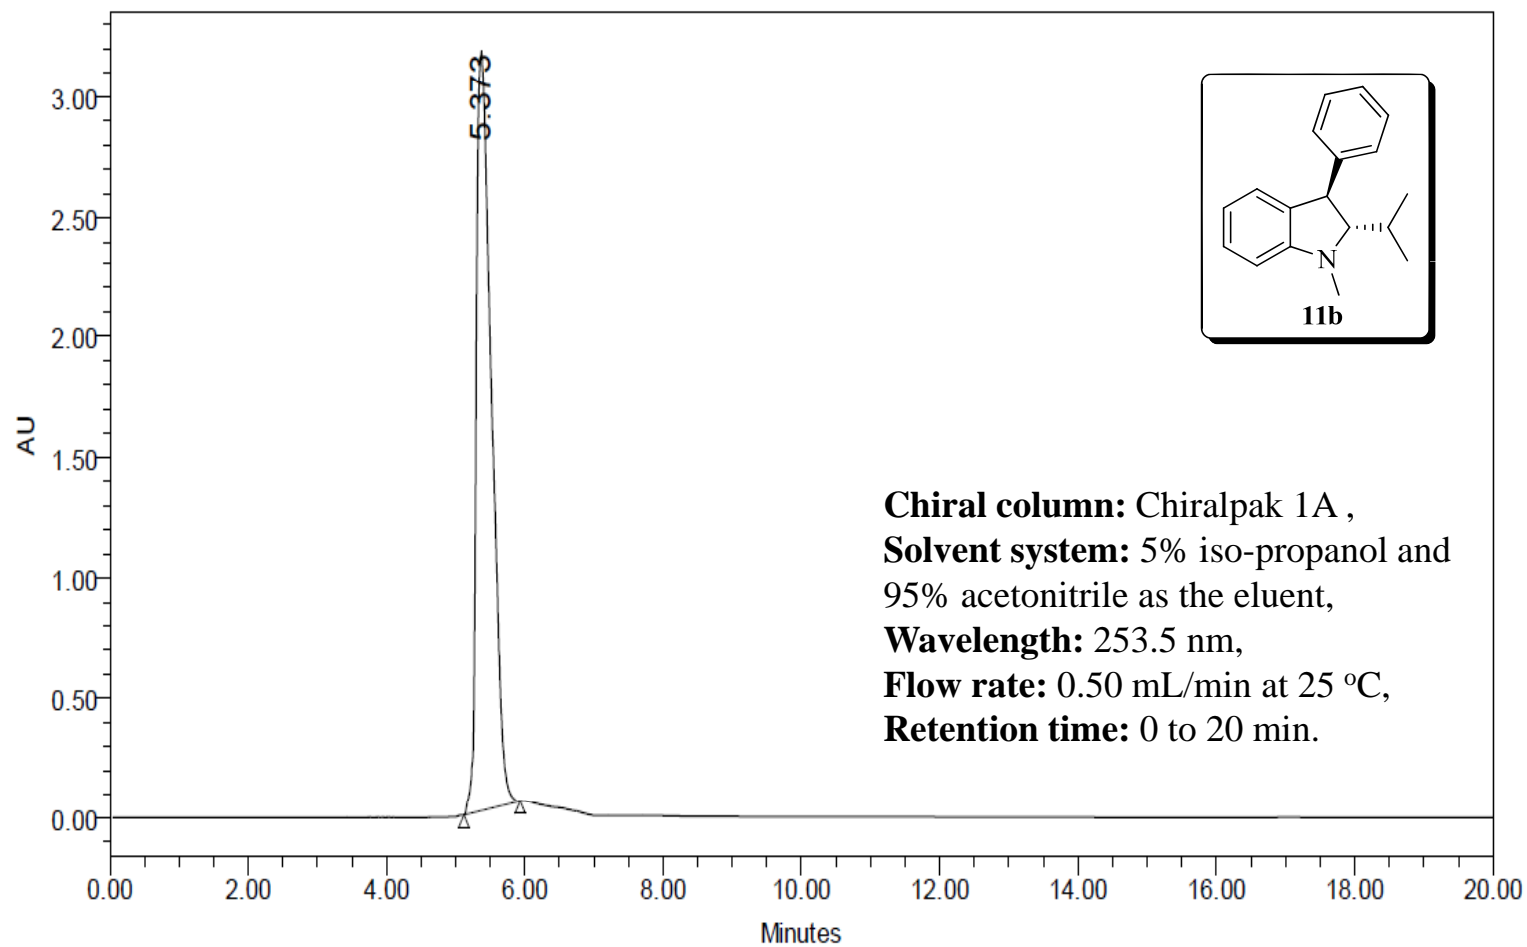

**Figure 88:** HPLC -Spectrum of **11b**.

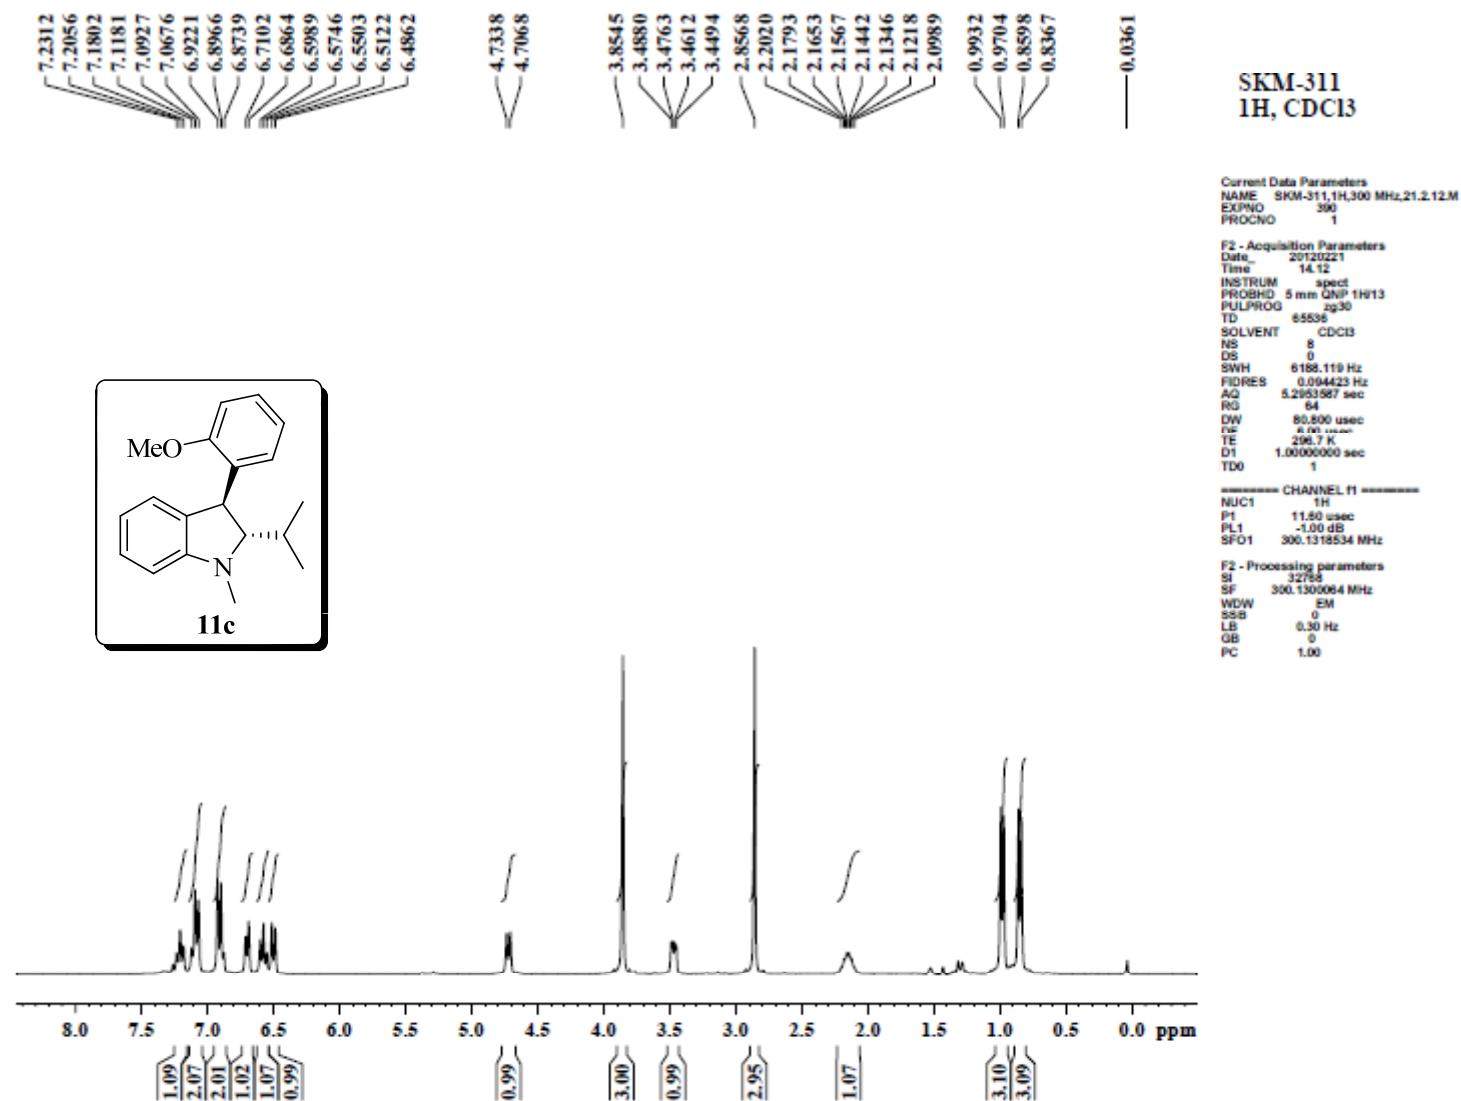

**Figure 89:** <sup>1</sup>H -NMR Spectrum of **11c**.

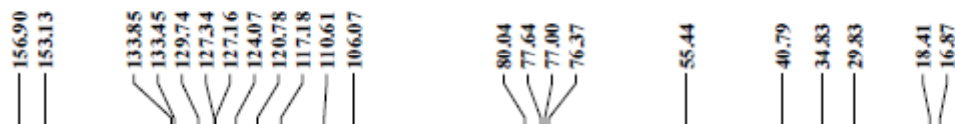

SKM-311  
13C, CDCl3

```

Current Data Parameters
NAME SKM-311,13C,200 MHz,23.2.12.M
EXPNO 330
PROCNO 1

F2 - Acquisition Parameters
Date_ 20120223
Time 16.10
INSTRUM spect
PROBHD 5 mm QNP 13C/
PULPROG zgpg30
TD 65536
SOLVENT CDCl3
NS 512
DS 4
SWH 11990.427 Hz
FIDRES 0.162859 Hz
AQ 2.7329011 sec
RG 320
DW 41.700 usec
DE 6.00 usec
TE 300 K
D1 2.0000000 sec
d11 0.0300000 sec
DELTA 1.3999999 sec
MCRET 0.0000000 sec
MCWRC 0.0100000 sec

===== CHANNEL f1 =====
NUC1 13C
P1 6.30 usec
PL1 -4.00 dB
SFO1 50.3277628 MHz

===== CHANNEL f2 =====
CPDPRG2 waltz16
NUC2 1H
PCPD2 100.00 usec
PL2 -4.00 dB
PL12 18.00 dB
PL13 22.00 dB
SFO2 200.1306000 MHz

F2 - Processing parameters
SI 32768
SF 50.3277614 MHz
WDW EM
GB 0
LB 3.00 Hz
GB 0
PC 1.60

```

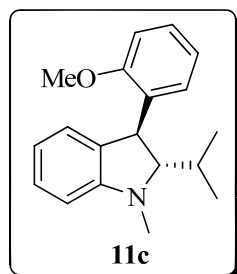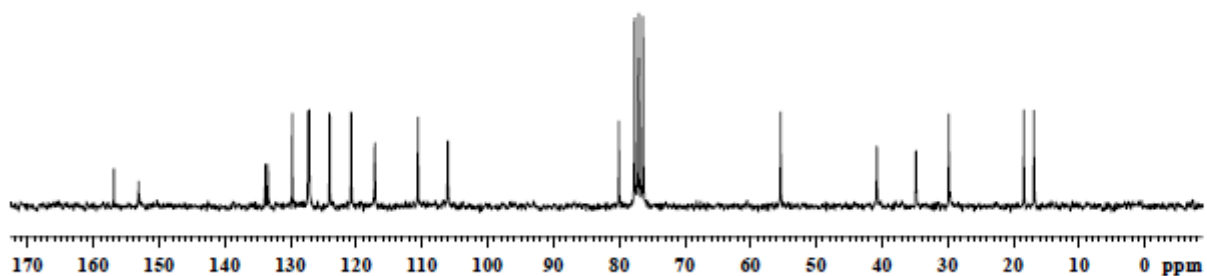

Figure 90:  $^{13}\text{C}$  -NMR Spectrum of **11c**.

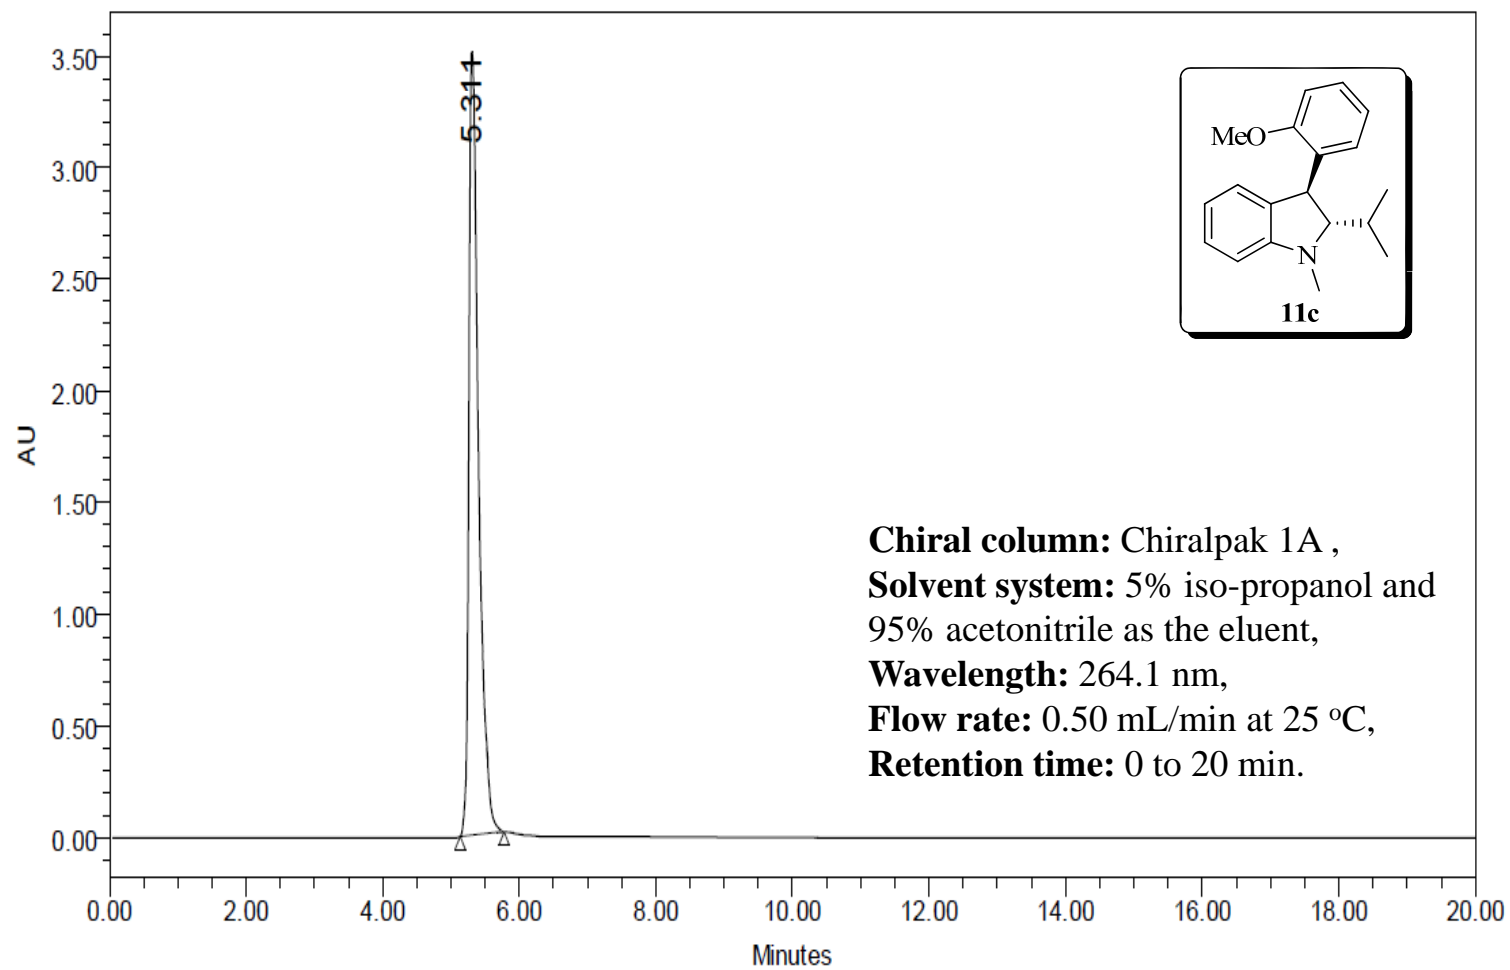

**Figure 91:** HPLC -Spectrum of **11c**

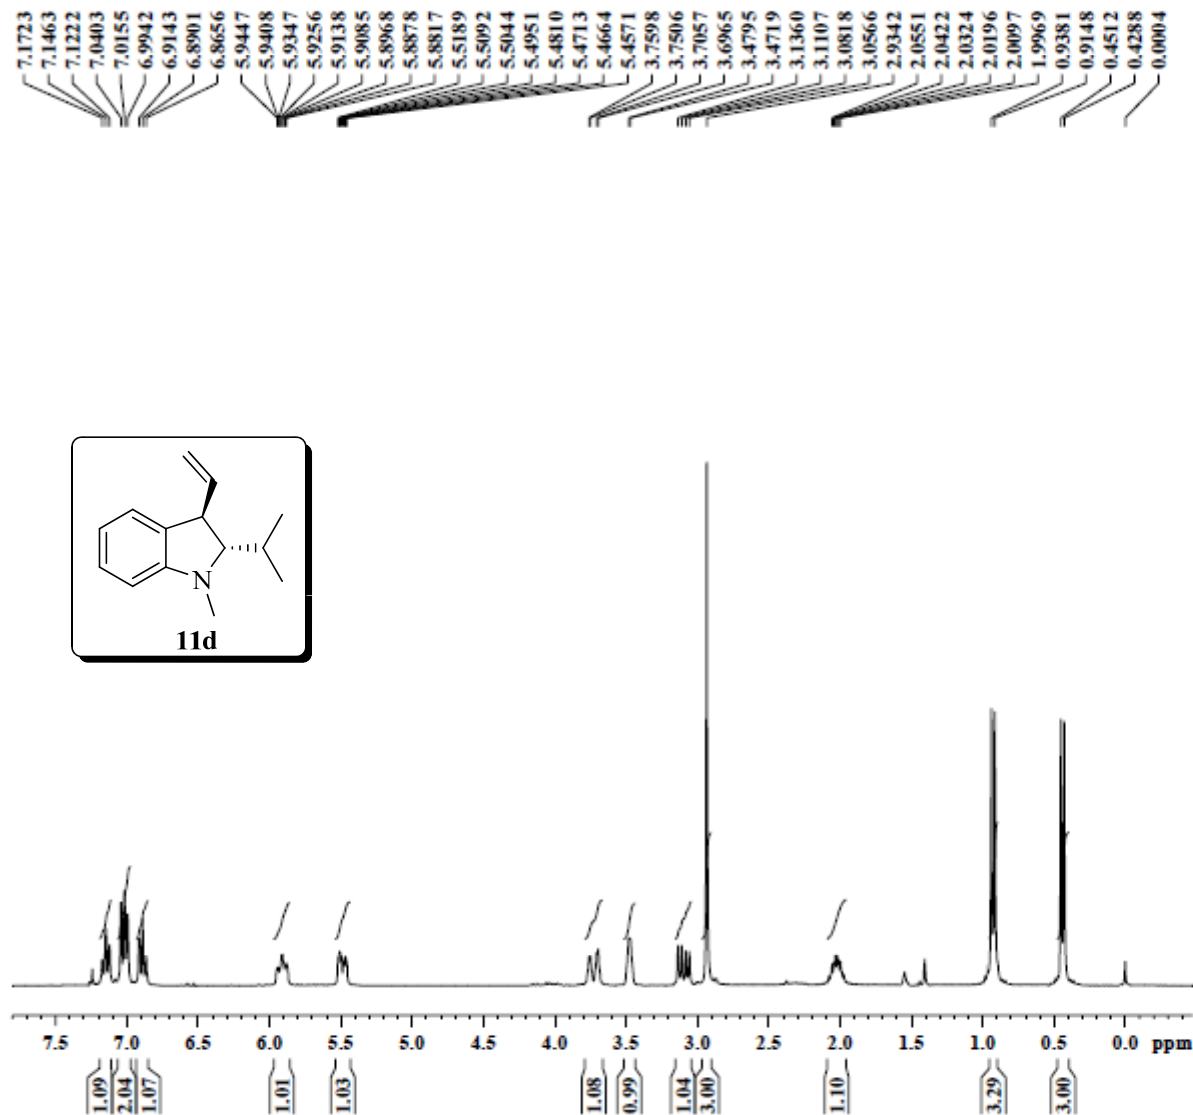

SKM-315  
1H, CDCl3

Current Data Parameters  
NAME SKM-315,1H,300 MHz,23.2,12.M  
EXPNO 400  
PROCNO 1

F2 - Acquisition Parameters  
Date\_ 20120227  
Time 14.33  
INSTRUM spect  
PROBHD 5 mm QNP 1H/13  
PULPROG zg30  
TD 65536  
SOLVENT CDCl3  
NS 8  
DS 0  
SWH 6188.119 Hz  
FIDRES 0.094423 Hz  
AQ 5.2953987 sec  
RG 90.5  
DW 80.500 usec  
DE 6.00 usec  
TE 297.8 K  
D1 1.0000000 sec  
TDO 1

===== CHANNEL f1 =====  
NUC1 1H  
P1 11.60 usec  
PL1 -1.00 dB  
SFO1 300.1318534 MHz

F2 - Processing parameters  
SI 32768  
SF 300.1300120 MHz  
WDW EM  
SSB 0  
LB 0.30 Hz  
GB 0  
PC 1.00

Figure 92: <sup>1</sup>H -NMR Spectrum of 11d.



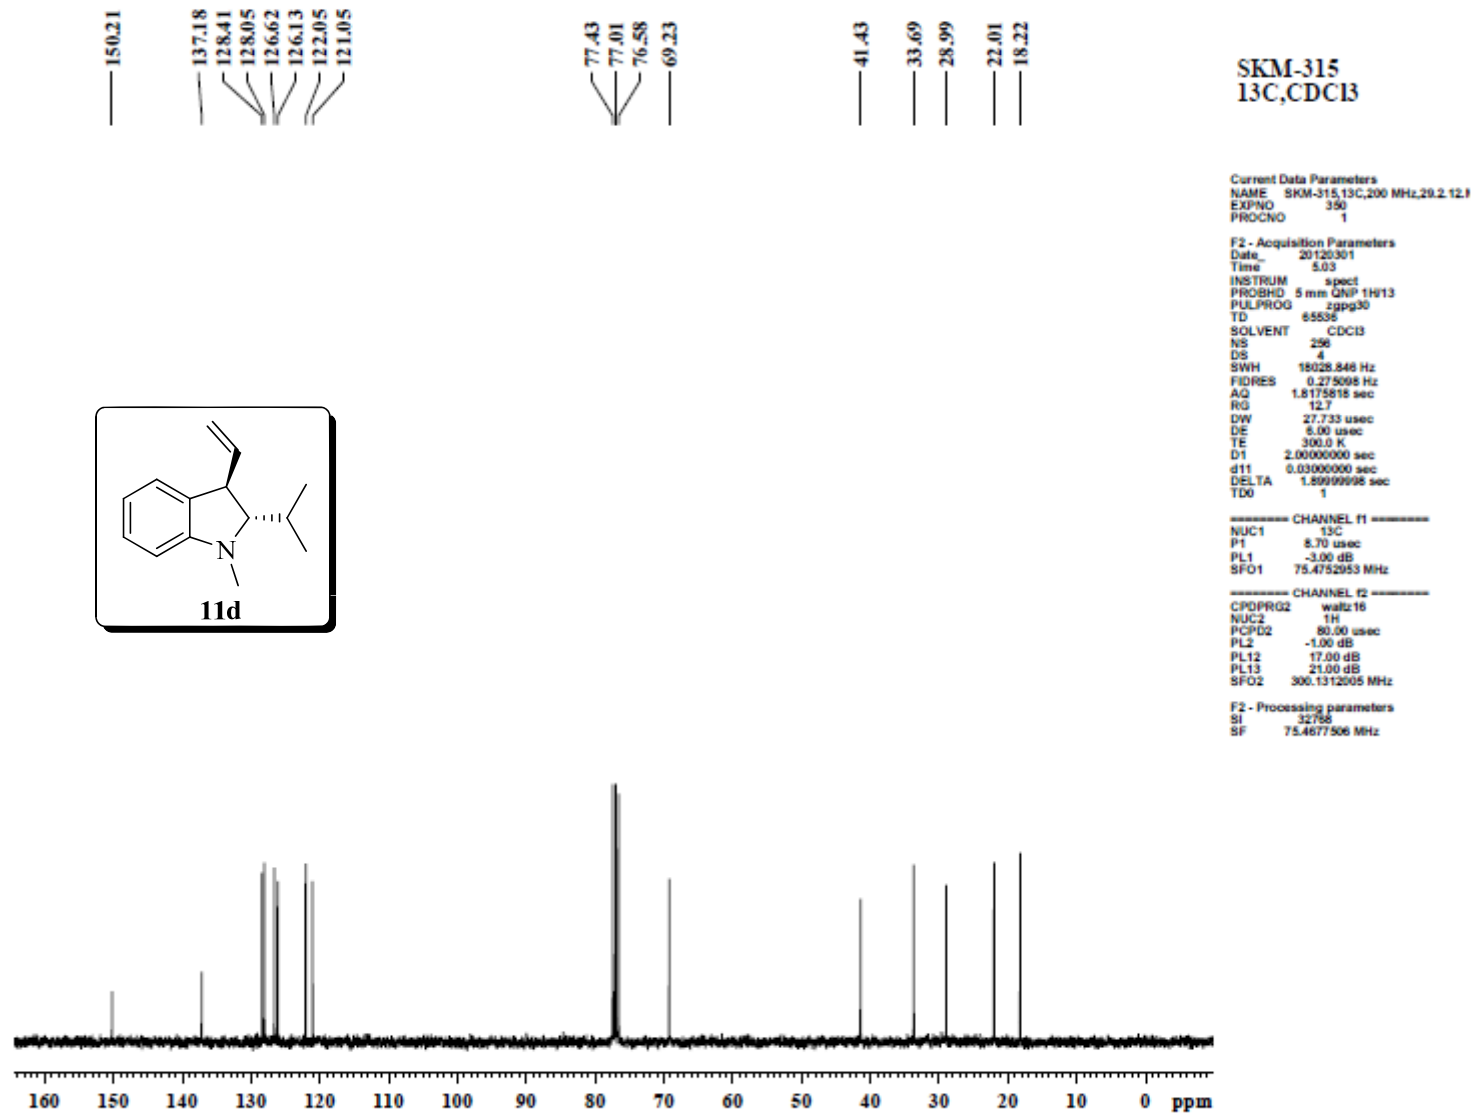

**Figure 93:**  $^{13}\text{C}$  -NMR Spectrum of **11d**.

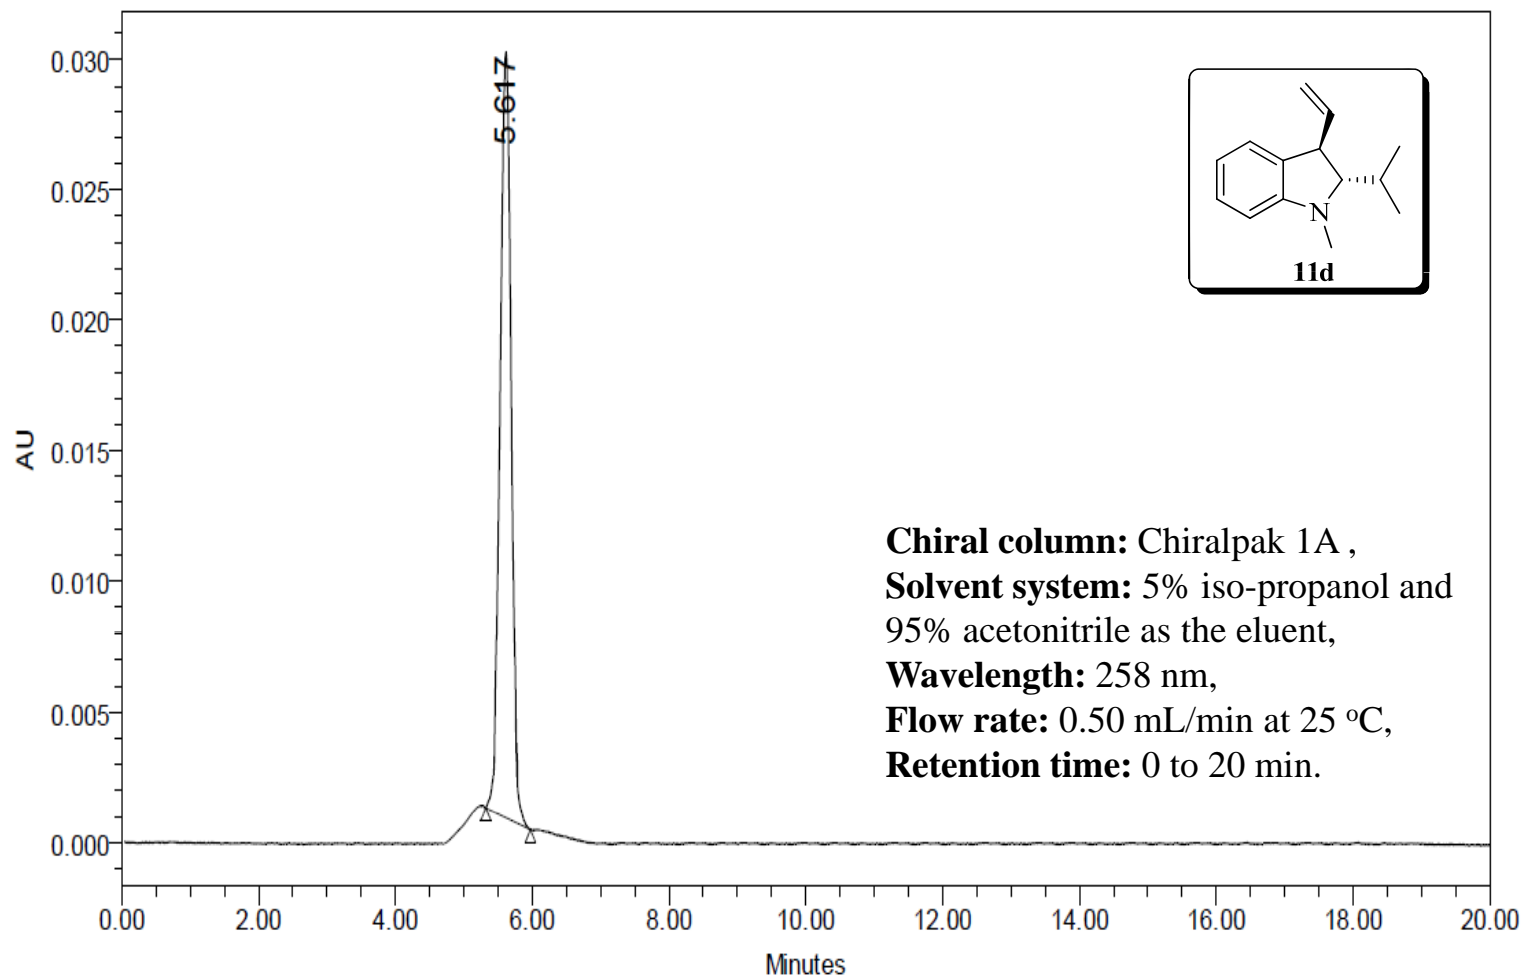

**Figure 94:** HPLC -Spectrum of **11d**.

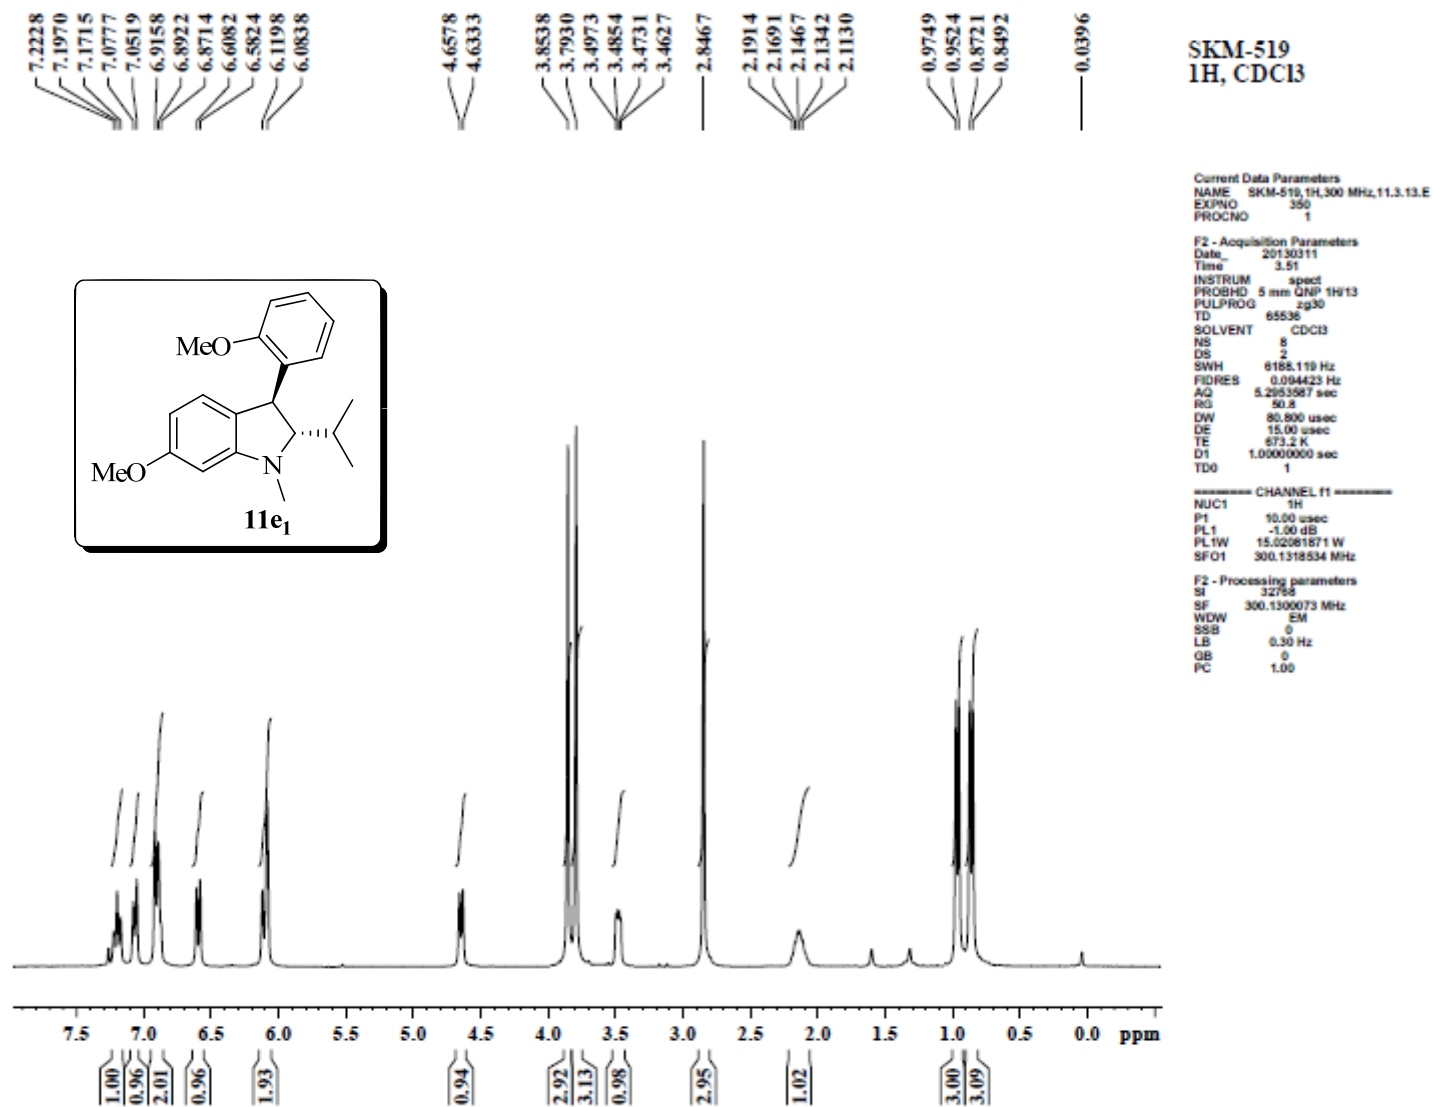

**Figure 95:** <sup>1</sup>H -NMR Spectrum of **11e<sub>1</sub>**.

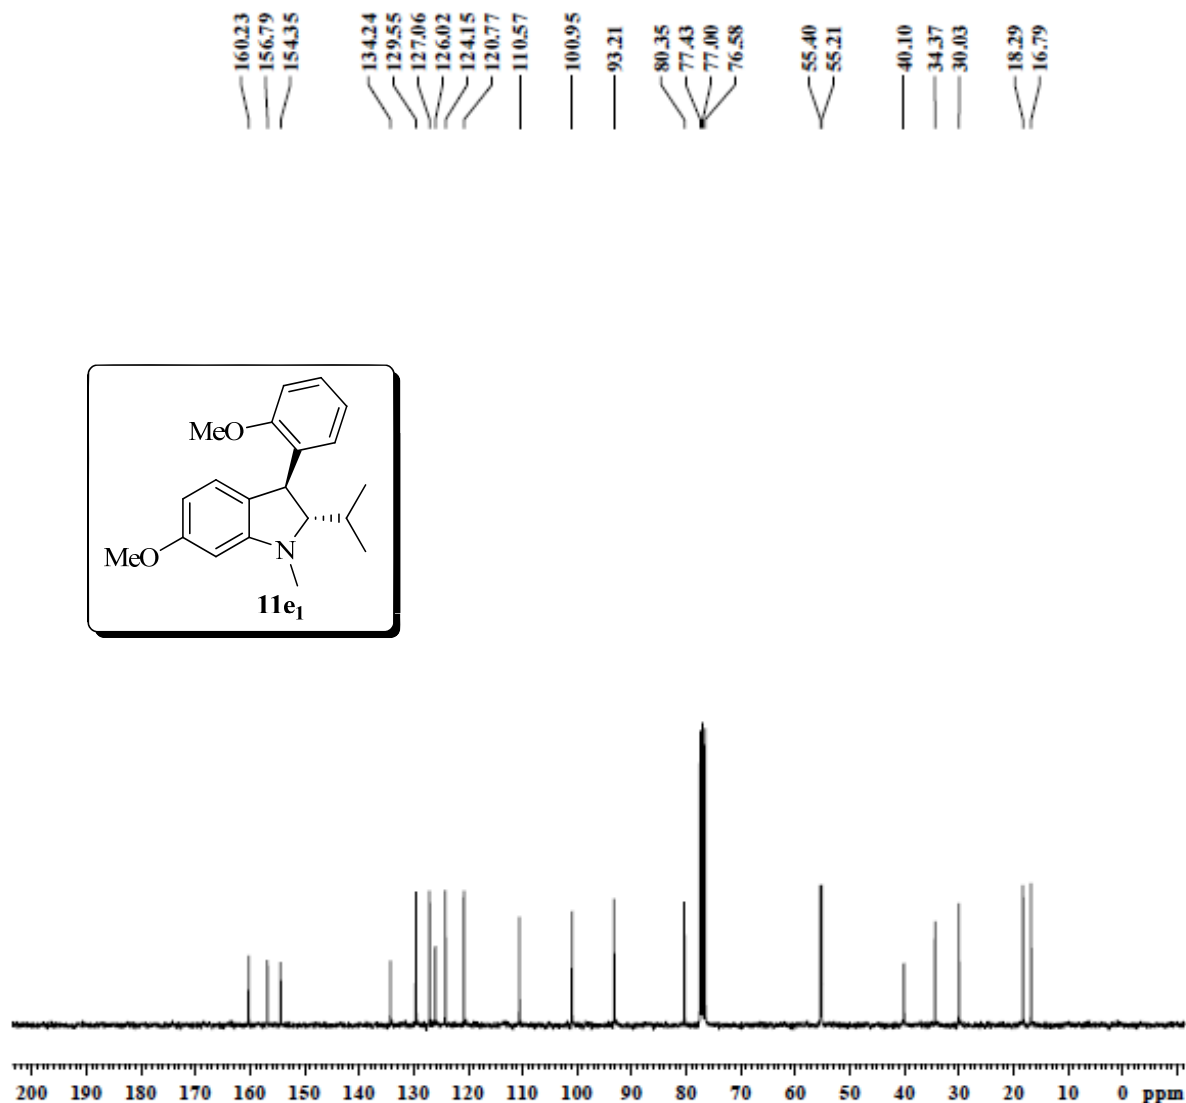

SKM-519  
13C, CDCl<sub>3</sub>

Current Data Parameters  
NAME SKM-519,13C,300 MHz,11.3.13.E  
EXPNO 351  
PROCNO 1

F2 - Acquisition Parameters  
Date\_ 20130311  
Time 4.34  
INSTRUM spect  
PROBHD 5 mm QNP 1H/13  
PULPROG zgpg30  
TD 65536  
SOLVENT CDCl<sub>3</sub>  
NS 233  
DS 4  
SWH 18028.846 Hz  
FIDRES 0.275096 Hz  
AQ 1.8175816 sec  
RG 2050  
DW 27.733 usec  
DE 15.00 usec  
TE 873.2 K  
D1 2.0000000 sec  
D11 0.0300000 sec  
TD0 1

----- CHANNEL f1 -----  
NUC1 13C  
P1 8.15 usec  
PL1 -3.00 dB  
PL1W 55.13059616 W  
SFO1 75.4752953 MHz

----- CHANNEL f2 -----  
CPDPRG2 waltz16  
NUC2 1H  
PCPD2 80.00 usec  
PL2 -1.00 dB  
PL12 17.06 dB  
PL13 21.00 dB  
PL2W 15.02061871 W  
PL12W 0.22479781 W  
PL13W 0.59477496 W  
SFO2 300.1312005 MHz

F2 - Processing parameters  
SI 32768  
SF 75.4677547 MHz  
WDW EM  
SSB 0  
LB 2.00 Hz  
GB 0  
PC 1.40

Figure 96: <sup>13</sup>C -NMR Spectrum of **11e<sub>1</sub>**.

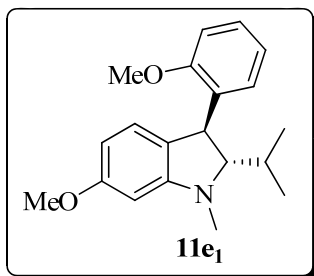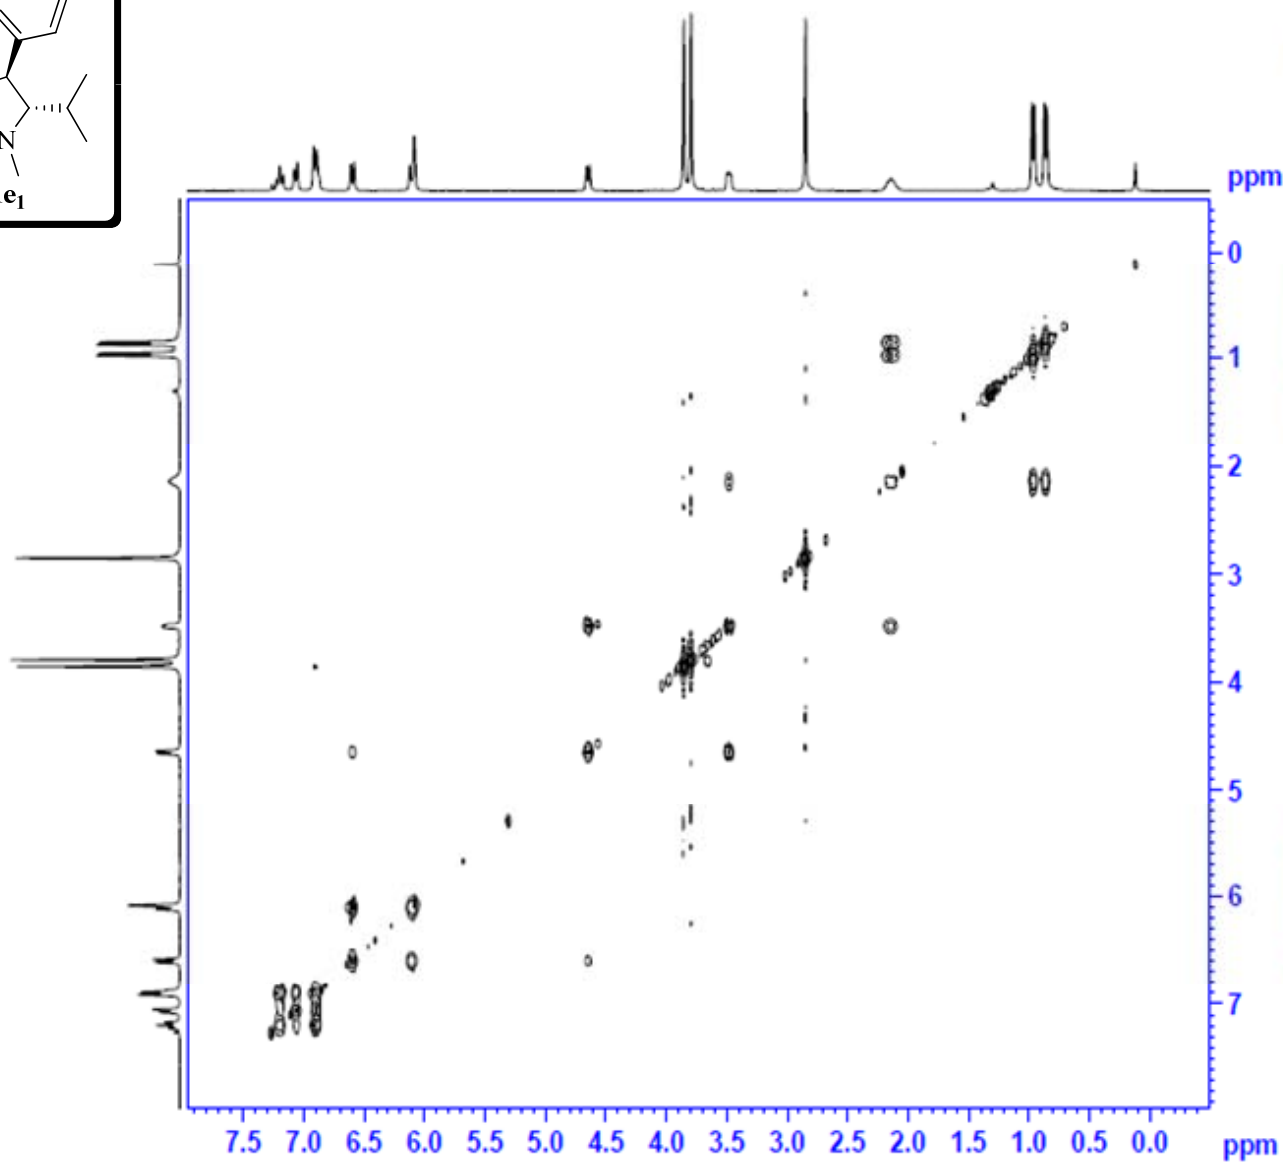

SKM-519  
COSY, CDCl<sub>3</sub>

Current Data Parameters  
NAME SKM-519\_COSY\_400 MHz\_4 July 2013.8  
EXPNO 661  
PROCNO 1

F2 - Acquisition Parameters  
Date\_ 20130704  
Time 19.59  
INSTRUM spect  
PROBHD 5 mm PABBO SB/  
PULPROG cosypppqf  
TD 2048  
SOLVENT CDCl<sub>3</sub>  
NS 8  
DS 8  
SWH 3378.378 Hz  
FIDRES 1.849599 Hz  
AQ 0.3031040 sec  
RG 19.45  
DW 148.000 usec  
DE 6.50 usec  
TE 297.3 K  
D0 0.00000300 sec  
D1 1.8885802 sec  
D11 0.03000000 sec  
D12 0.00002000 sec  
D13 0.00000400 sec  
D18 0.00020000 sec  
R0 0.00029600 sec

===== CHANNEL f1 =====  
SFO1 400.1619979 MHz  
NUC1 1H  
P0 12.35 usec  
P1 12.35 usec  
P17 2500.00 usec  
PLW1 14.00000000 W  
PLW10 3.15879989 W

===== GRADIENT CHANNEL =====  
GPNAM(1) SMSQ10.100  
GPZ1 10.00 %  
P16 1000.00 usec

F1 - Acquisition parameters  
TD 128  
SFO1 400.162 MHz  
FIDRES 28.393581 Hz  
SFW 8.443 ppm  
FnMODE QF

F2 - Processing parameters  
SI 1024  
SF 400.160560 MHz  
WOW GSIKE  
SSB 0  
LB 0 Hz  
GB 0  
PC 1.40

F1 - Processing parameters  
42

Figure 97: COSY -Spectrum of **11e<sub>1</sub>**.

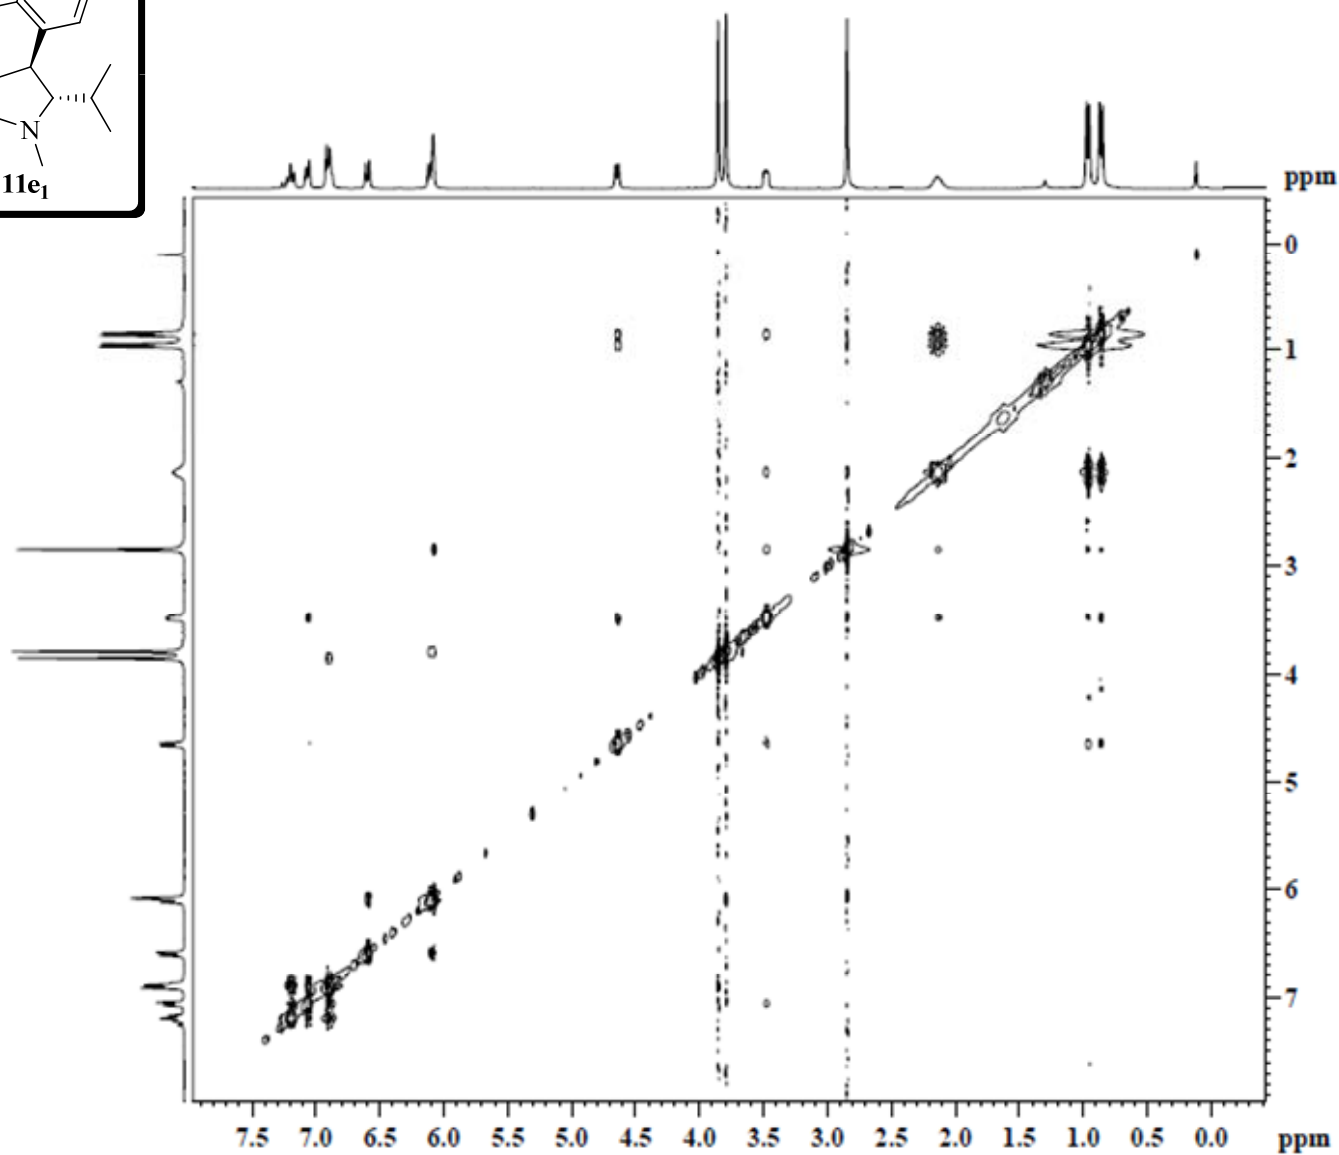

SKM-519  
NOESY, CDCl<sub>3</sub>

Current Data Parameters  
NAME SKM-519.NOESY.400 MHz.27 Jun.2013.E  
EXPNO 111  
PROCNO 1

F2 - Acquisition Parameters  
Date\_ 20130628  
Time 3.22  
INSTRUM spect  
PROBHD 5 mm PABBO BBI  
PULPROG zgpg30mtp  
TD 2048  
SOLVENT CDCl<sub>3</sub>  
NS 16  
DS 32  
SWH 3166.705 Hz  
FREQS 1.638628 Hz  
AQ 0.3061420 sec  
RG 22.13  
DN 140.500 usec  
DE 6.50 usec  
TE 300.2 K  
D0 0.00015000 sec  
D1 1.90004700 sec  
D6 0.30000001 sec  
D11 0.20000000 sec  
D12 0.00002000 sec  
D16 0.00020000 sec  
RG 0.00020000 sec

----- CHANNEL f1 -----  
SFO1 400.1620132 MHz  
NUC1 13  
P1 12.00 usec  
P2 24.70 usec  
P17 2000.00 usec  
PLW1 14.80000000 W  
PLW0 3.15879999 W

----- GRADIENT CHANNEL -----  
GPNAM1) SRF50 10.100  
GPZ1 40.00 %  
P16 1000.00 usec

F1 - Acquisition parameters  
TD 2048  
SFO1 400.162 MHz  
FREQS 13.108221 Hz  
SW 8.396 ppm  
PulsePR Stelwa-TPP1

F2 - Processing parameters  
SI 1024  
SF 400.160062 MHz  
WOW COSY  
SSB 2  
LB 0 Hz  
GB 0  
PC 1.00

F1 - Processing parameters  
SI 1024  
MC2 Stelwa-TPP1  
SF 400.160062 MHz  
WOW COSY  
SSB 2  
LB 0 Hz  
GB 0

Figure 98: NOESY -Spectrum of 11e<sub>1</sub>.

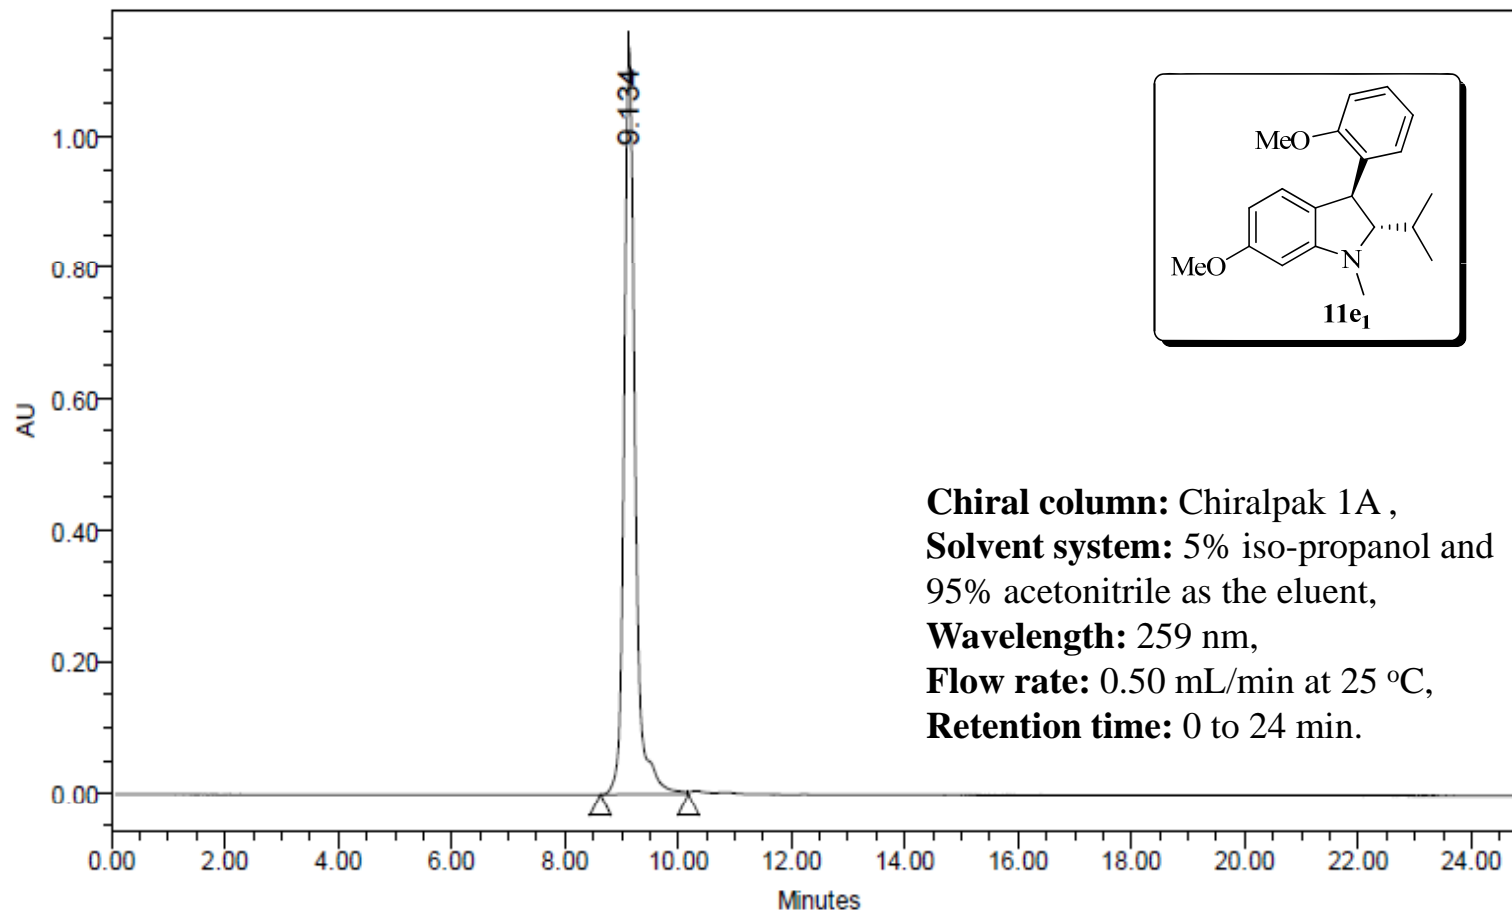

**Figure 99:** HPLC -Spectrum of **11e<sub>1</sub>**.

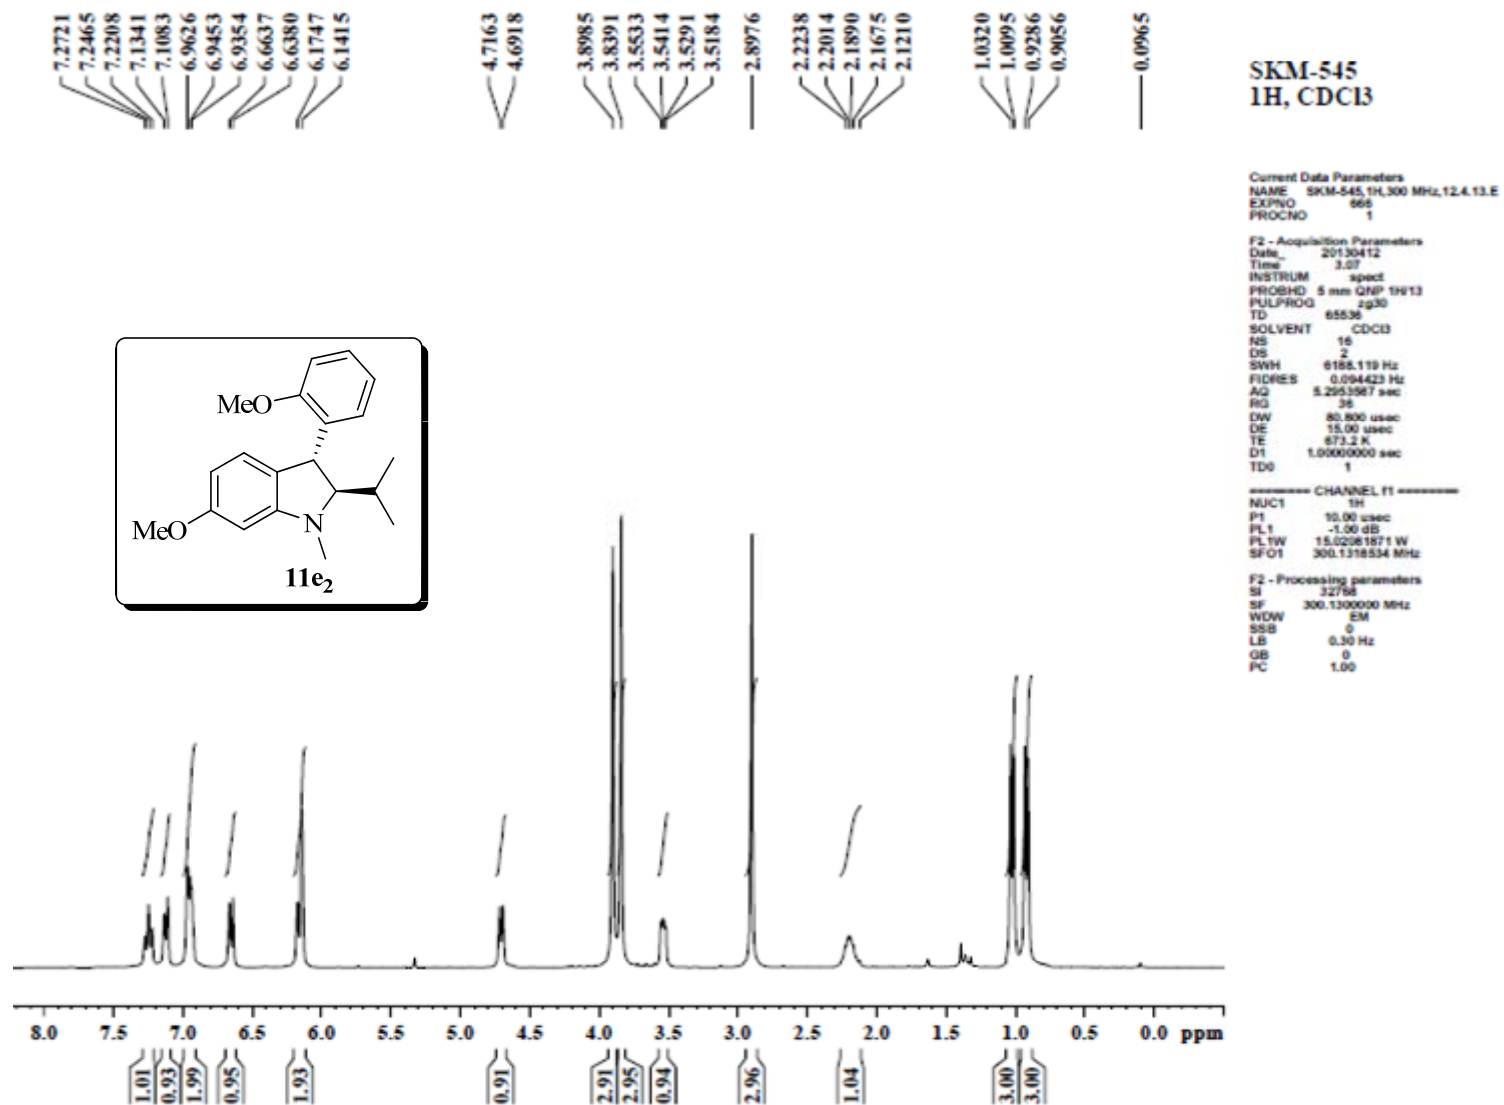

**Figure 100: <sup>1</sup>H -NMR Spectrum of 11e<sub>2</sub>.**



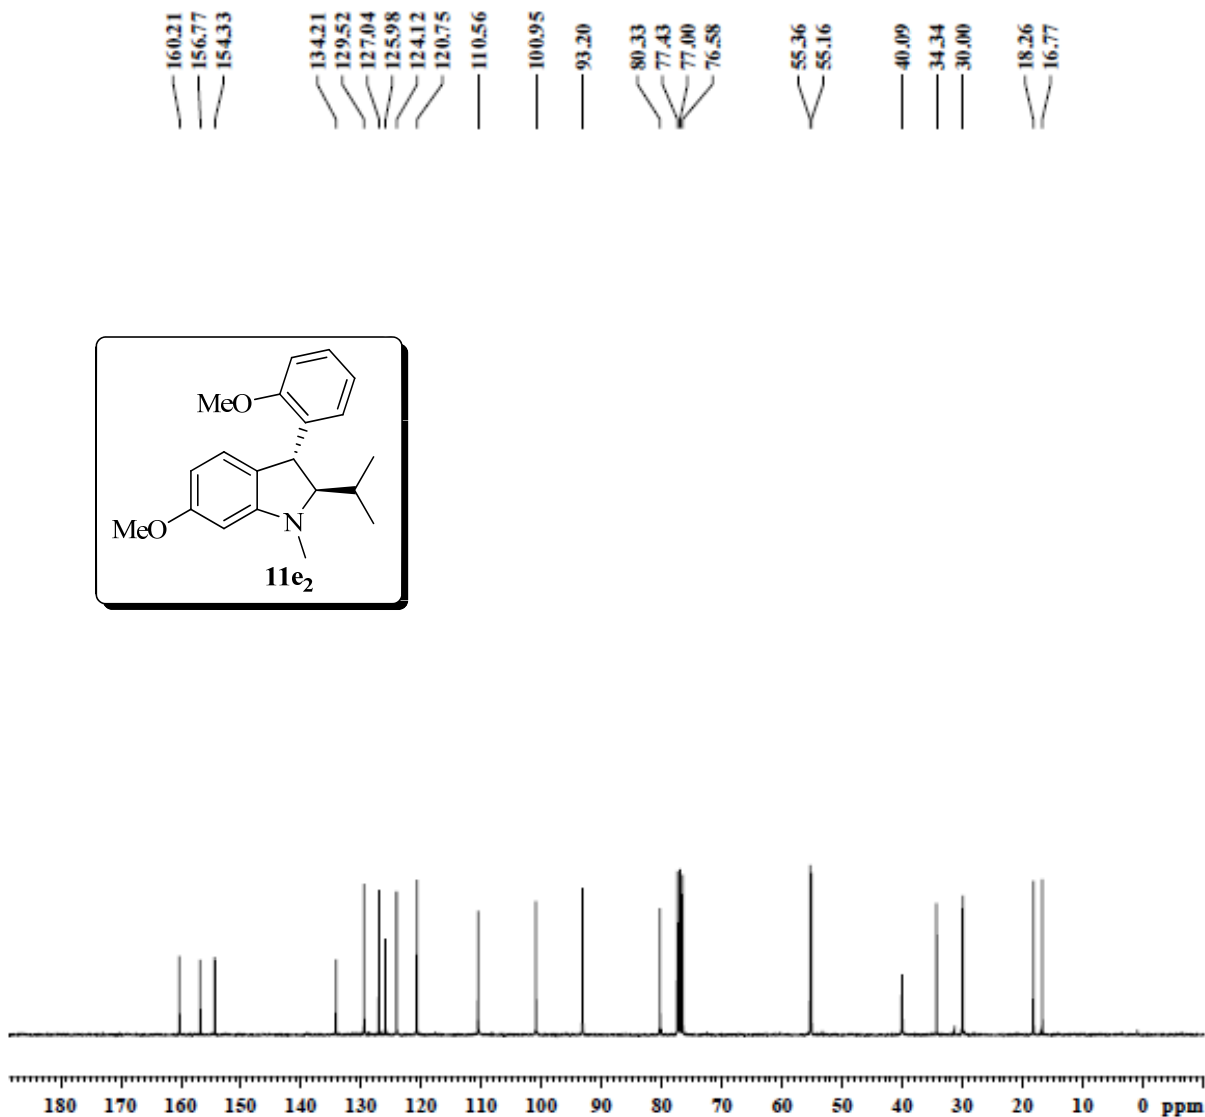

SKM-545  
13C, CDCl<sub>3</sub>

Current Data Parameters  
NAME SKM-545.13C,300 MHz,12.4.13.E  
EXPNO 867  
PROCNO 1

F2 - Acquisition Parameters  
Date\_ 20130412  
Time 3.37  
INSTRUM spect  
PROBHD 5 mm QNP 1H/13  
PULPROG zgpg30  
TD 65536  
SOLVENT CDCl<sub>3</sub>  
NS 512  
DS 4  
SWH 18028.848 Hz  
FIDRES 0.275098 Hz  
AQ 1.8175818 sec  
RG 2050  
DW 27.733 usec  
DE 15.00 usec  
TE 873.2 K  
D1 2.05000000 sec  
D11 0.03000000 sec  
TD0 1

===== CHANNEL f1 =====  
NUC1 13C  
P1 8.15 usec  
PL1 -3.00 dB  
PL1W 55.13059616 W  
SFO1 75.4752953 MHz

===== CHANNEL f2 =====  
CPDPRG2 waltz16  
NUC2 1H  
PCPD2 80.00 usec  
PL2 -1.00 dB  
PL12 17.06 dB  
PL13 21.00 dB  
PL2W 15.02081871 W  
PL12W 0.23479761 W  
PL13W 0.29477498 W  
SFO2 300.1312005 MHz

F2 - Processing parameters  
SI 32768  
SF 75.4677591 MHz  
WDW EM  
SSB 0  
LB 1.00 Hz  
GB 0  
PC 1.40

Figure 101: <sup>13</sup>C -NMR Spectrum of **11e<sub>2</sub>**.

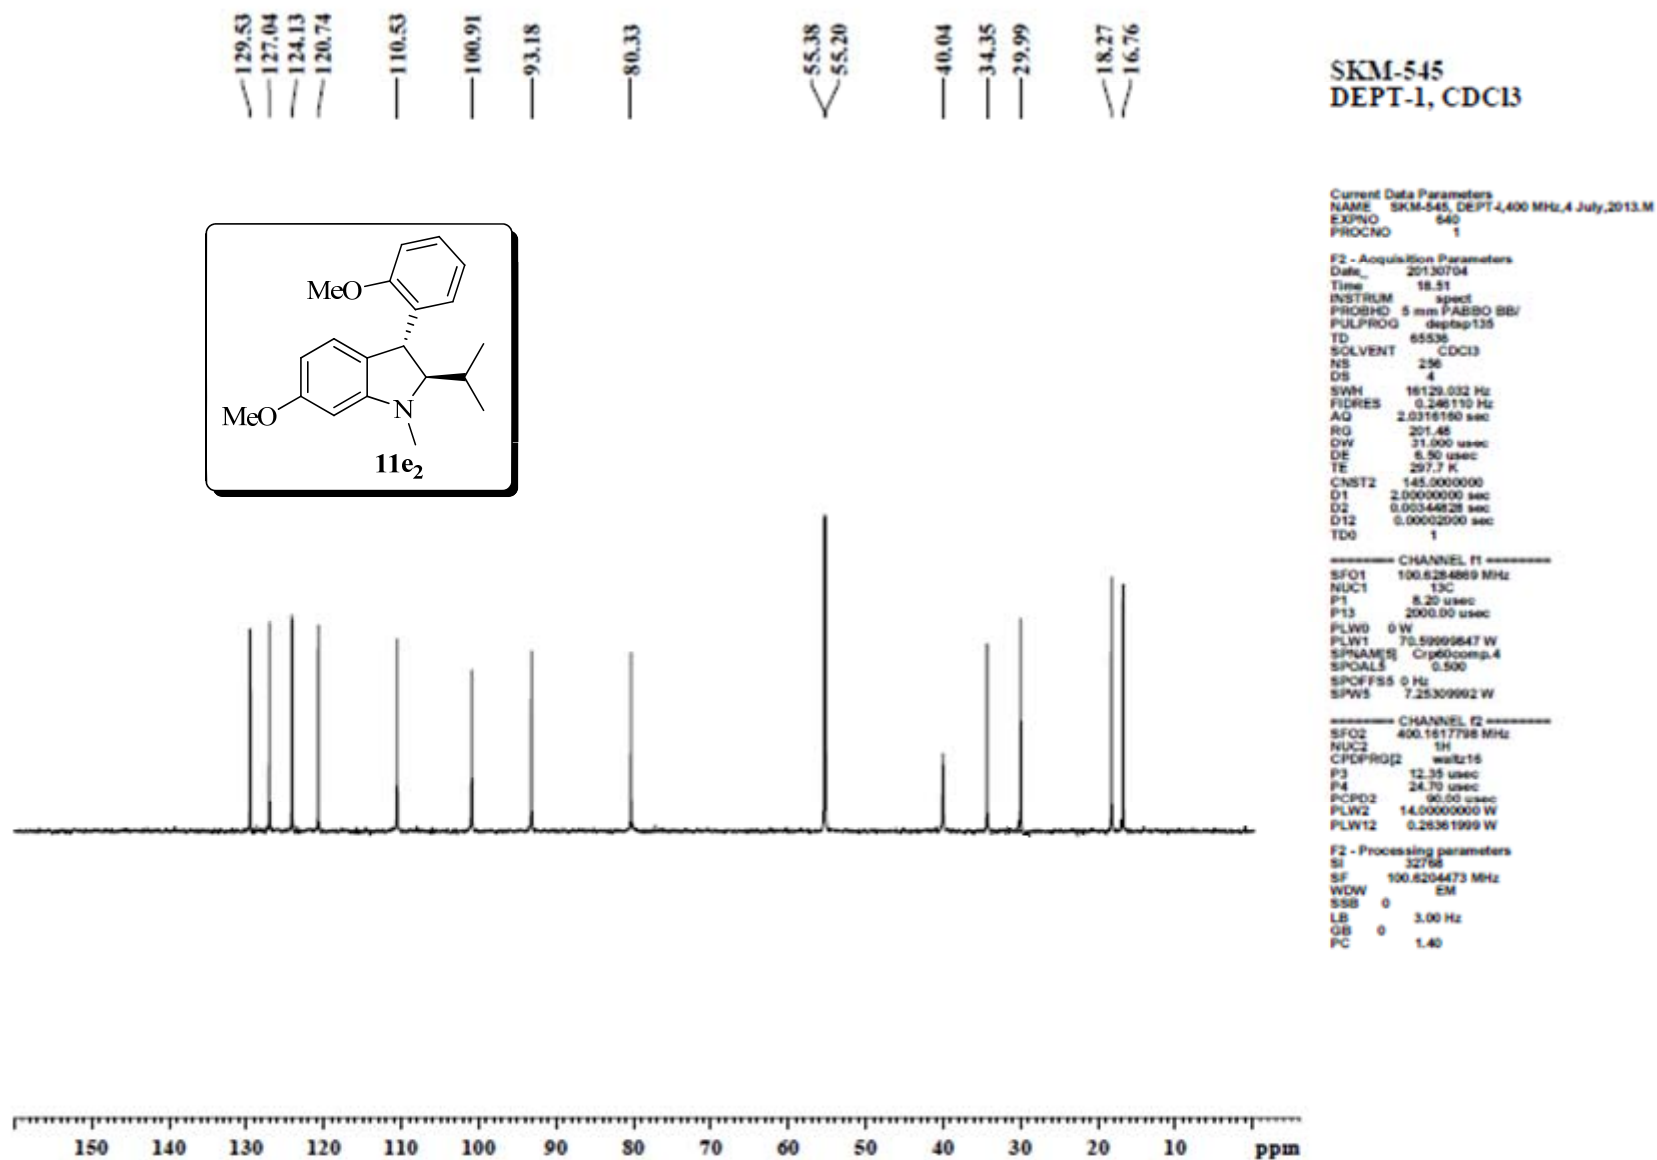

Figure 102: DEPT-13C -Spectrum of **11e<sub>2</sub>**.

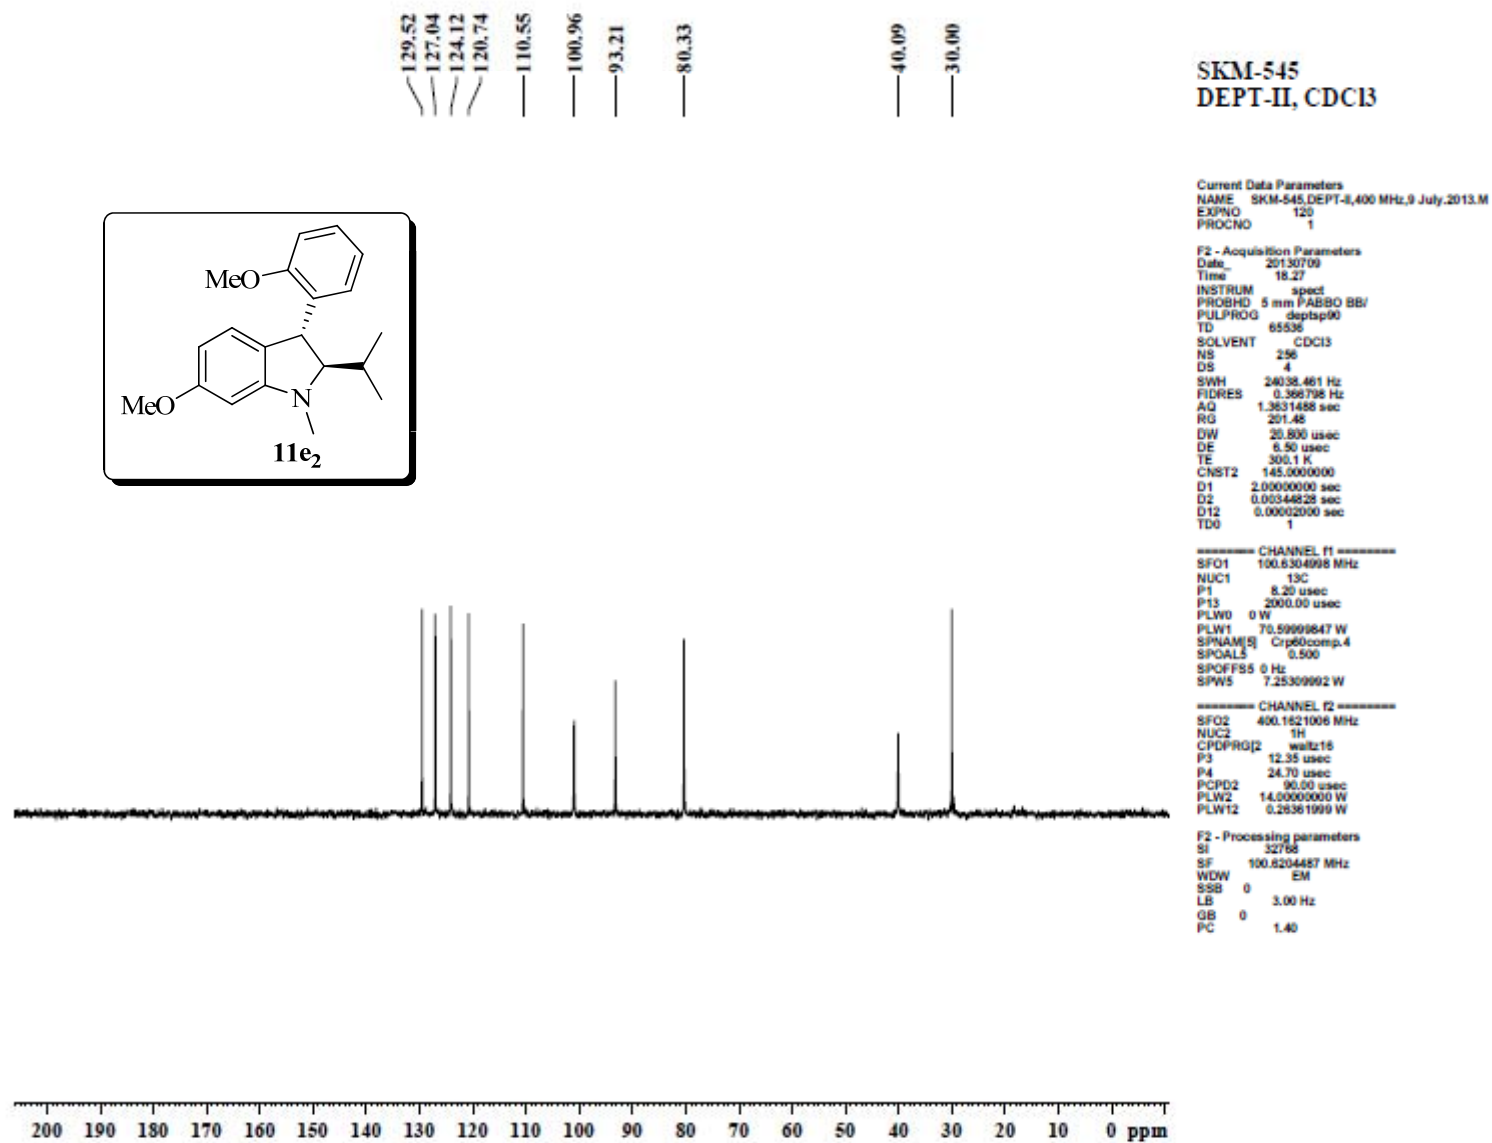

**Figure 103: DEPT-II -Spectrum of 11e<sub>2</sub>.**

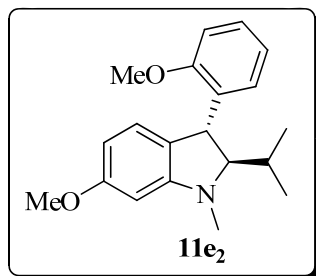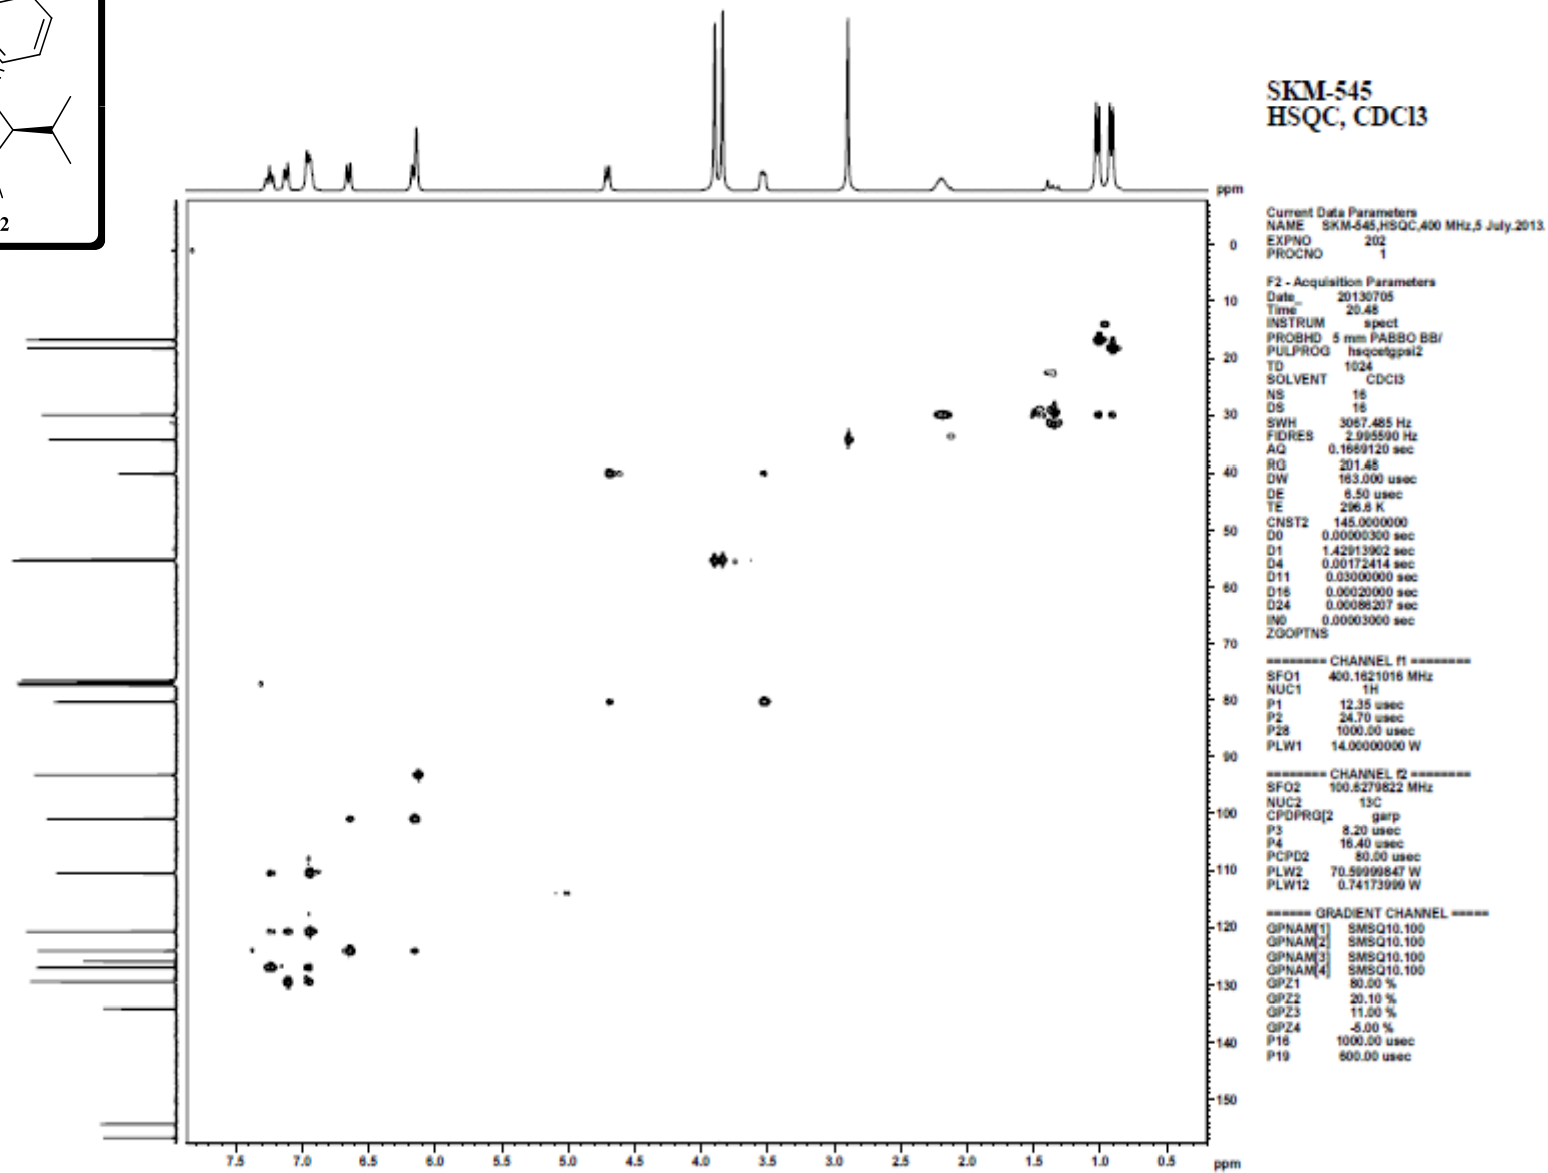

Figure 104: HSQC -Spectrum of **11e<sub>2</sub>**.

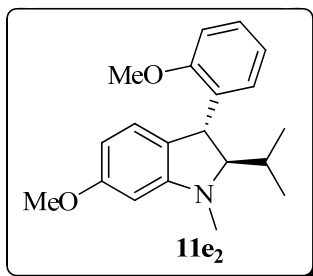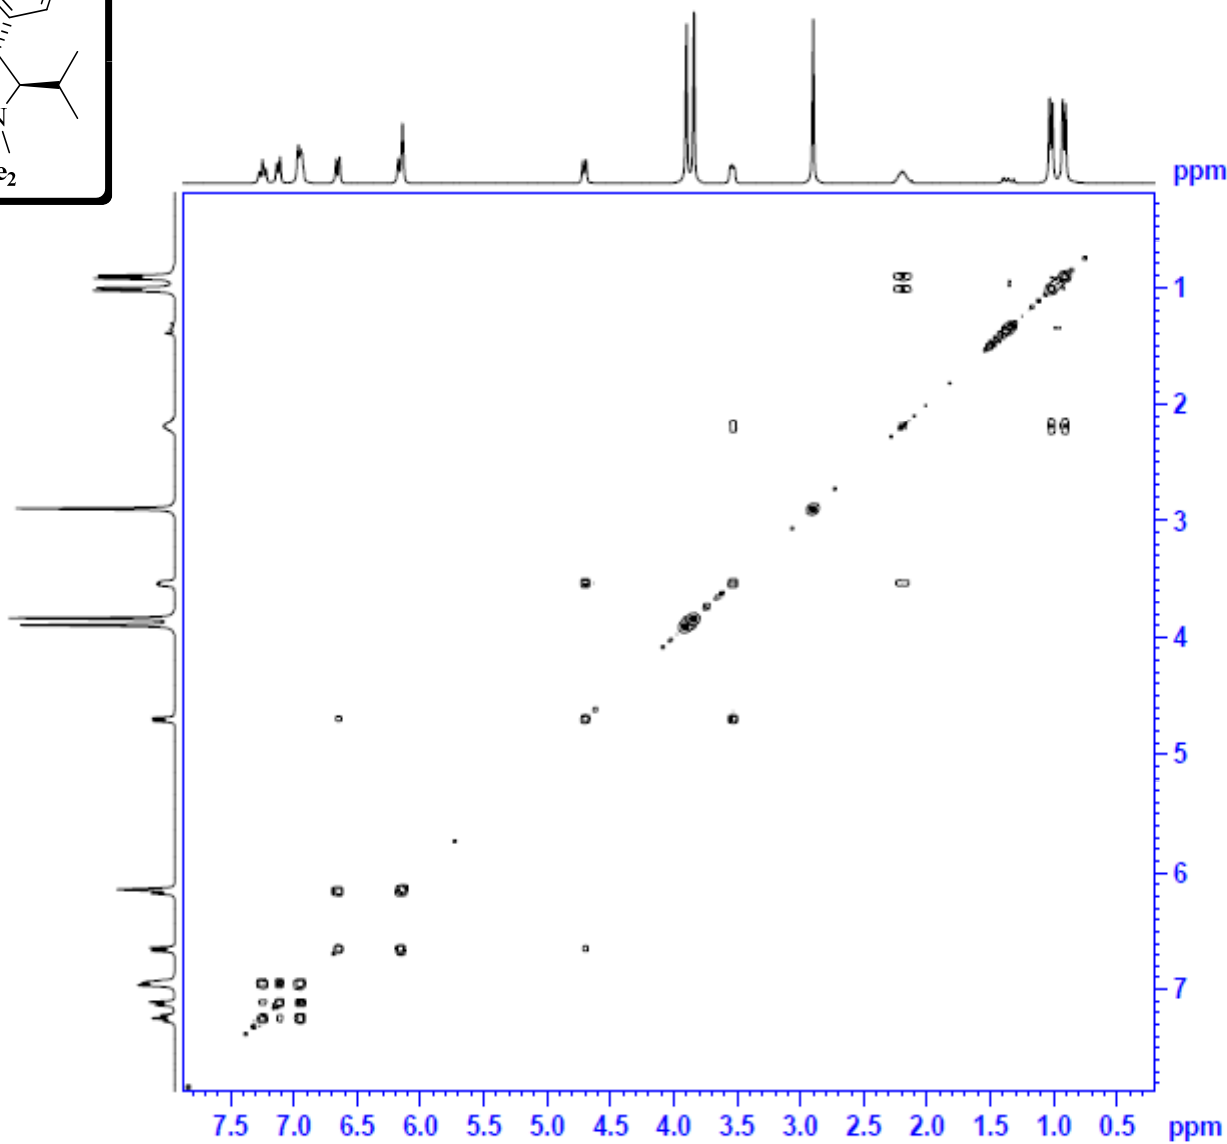

**SKM-545  
COSY, CDC13**

Current Data Parameters  
 NAME SKM-545,COSY,400 MHz,5 July,2013.E  
 EXPNO 201  
 PROCNO 1

F2 - Acquisition Parameters  
 Date\_ 20130705  
 Time 19.30  
 INSTRUM spect  
 PROBHD 5 mm PABBO BB/  
 PULPROG cosygpppqf  
 TD 2048  
 SOLVENT CDC13  
 NS 16  
 DS 8  
 SWH 3067.485 Hz  
 FIDRES 1.407795 Hz  
 AQ 0.3338240 sec  
 RG 18.04  
 DW 163.000 usec  
 DE 6.50 usec  
 TE 295.5 K  
 D0 0.00000300 sec  
 D1 1.85786903 sec  
 D11 0.03000000 sec  
 D12 0.0002000 sec  
 D13 0.0000400 sec  
 D16 0.0002000 sec  
 IN0 0.00032600 sec

----- CHANNEL f1 -----  
 SFO1 400.1621016 MHz  
 NUC1 1H  
 P0 12.35 usec  
 P1 12.35 usec  
 P17 2500.00 usec  
 PLW1 14.00000000 W  
 PLW10 3.15879889 W

----- GRADIENT CHANNEL -----  
 GPNAM[1] SMS-Q0.100  
 GPZ1 10.00 %  
 P16 1000.00 usec

F1 - Acquisition parameters  
 TD 128  
 SFO1 400.1621 MHz  
 FIDRES 23.964724 Hz  
 SW 7.866 ppm  
 F1MODE QF

F2 - Processing parameters  
 SI 1024  
 SF 400.1604861 MHz  
 WDW QSINE  
 SSB 0  
 LB 0 Hz  
 GB 0  
 PC 1.40

F1 - Processing parameters  
 SI 1024  
 MC2 QF  
 SF 400.1604854 MHz  
 WDW QSINE  
 SSB 0  
 LB 0 Hz  
 GB 0

**Figure 105: COSY -Spectrum of 11e<sub>2</sub>.**

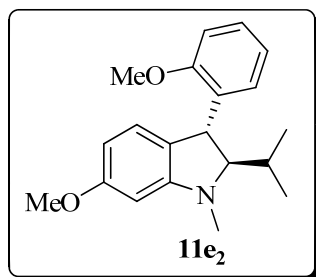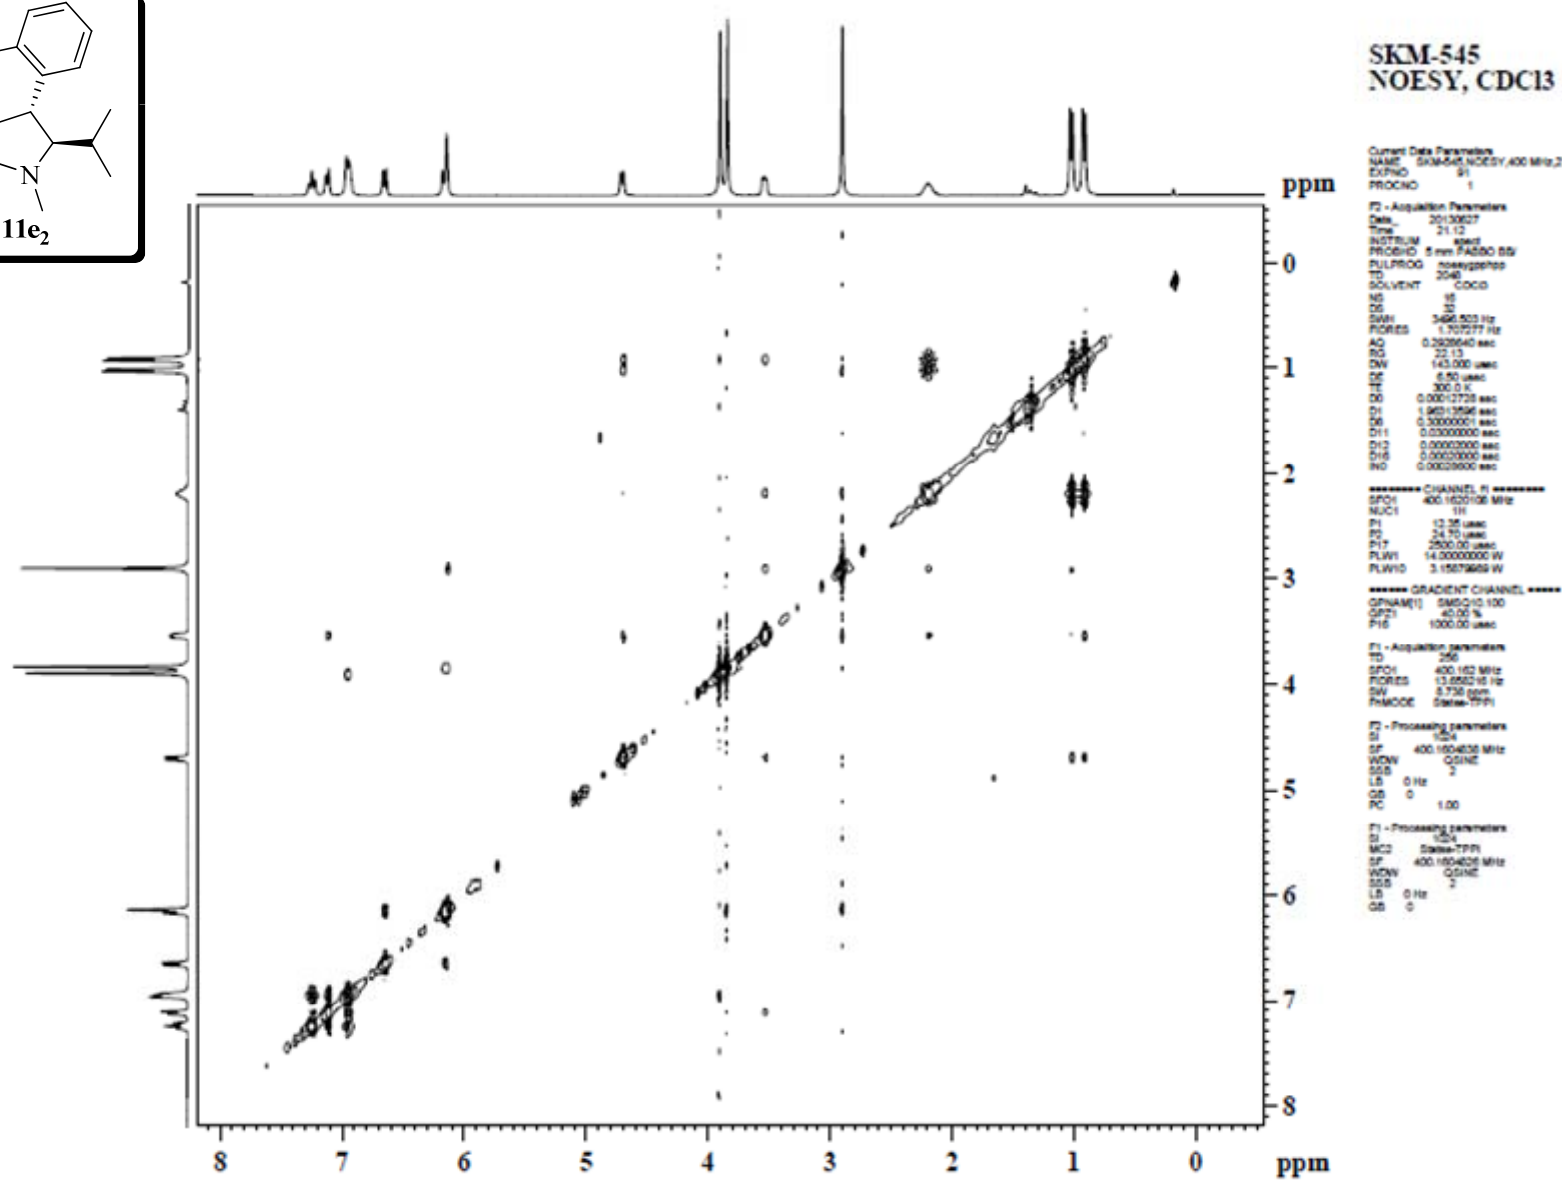

SKM-545  
NOESY, CDC13

Current Data Parameters  
NAME SKM-545.NOESY.400.MHz.27.June.2013.E  
EXPNO 51  
PROCNO 1

F2 - Acquisition Parameters  
Date\_ 20130627  
Time 21.13  
INSTRUM spect  
PROBHD 5 mm PABBO BBI  
PULPROG zgpg30p  
TD 32768  
SOLVENT CDCl3  
NS 16  
DS 32  
SWH 5466.503 Hz  
FIDRES 1.707277 Hz  
AQ 0.326645 sec  
RG 32.13  
DW 143.000 usec  
DE 6.50 usec  
TE 300.2 K  
D0 0.00017728 sec  
D1 1.90017594 sec  
D8 0.30000001 sec  
D11 0.03000000 sec  
D12 0.00002000 sec  
D16 0.00002000 sec  
R0 0.00000000 sec

\*\*\*\*\* CHANNEL f1 \*\*\*\*\*  
SFO1 400.162108 MHz  
NUC1 1H  
P1 13.35 usec  
PC 24.70 usec  
P17 2500.00 usec  
PLW1 14.00000000 W  
PLW10 3.15079689 W

\*\*\*\*\* GRADIENT CHANNEL \*\*\*\*\*  
GPNAM1[1] SMO-Q1.100  
GPT1 40.00 %  
P16 1000.00 usec

F1 - Acquisition parameters  
TD 32768  
SFO1 400.162108 MHz  
FIDRES 13.866216 Hz  
SW 9.730 ppm  
PRMODE Data-TFPI

F1 - Processing parameters  
SI 32768  
SF 400.1604038 MHz  
WDW QDING  
SSB 2  
LB 0 Hz  
GB 0  
PC 1.00

F1 - Processing parameters  
SI 32768  
MC0 Data-TFPI  
SF 400.1604038 MHz  
WDW QDING  
SSB 2  
LB 0 Hz  
GB 0

Figure 106: NOESY -Spectrum of **11e<sub>2</sub>**.

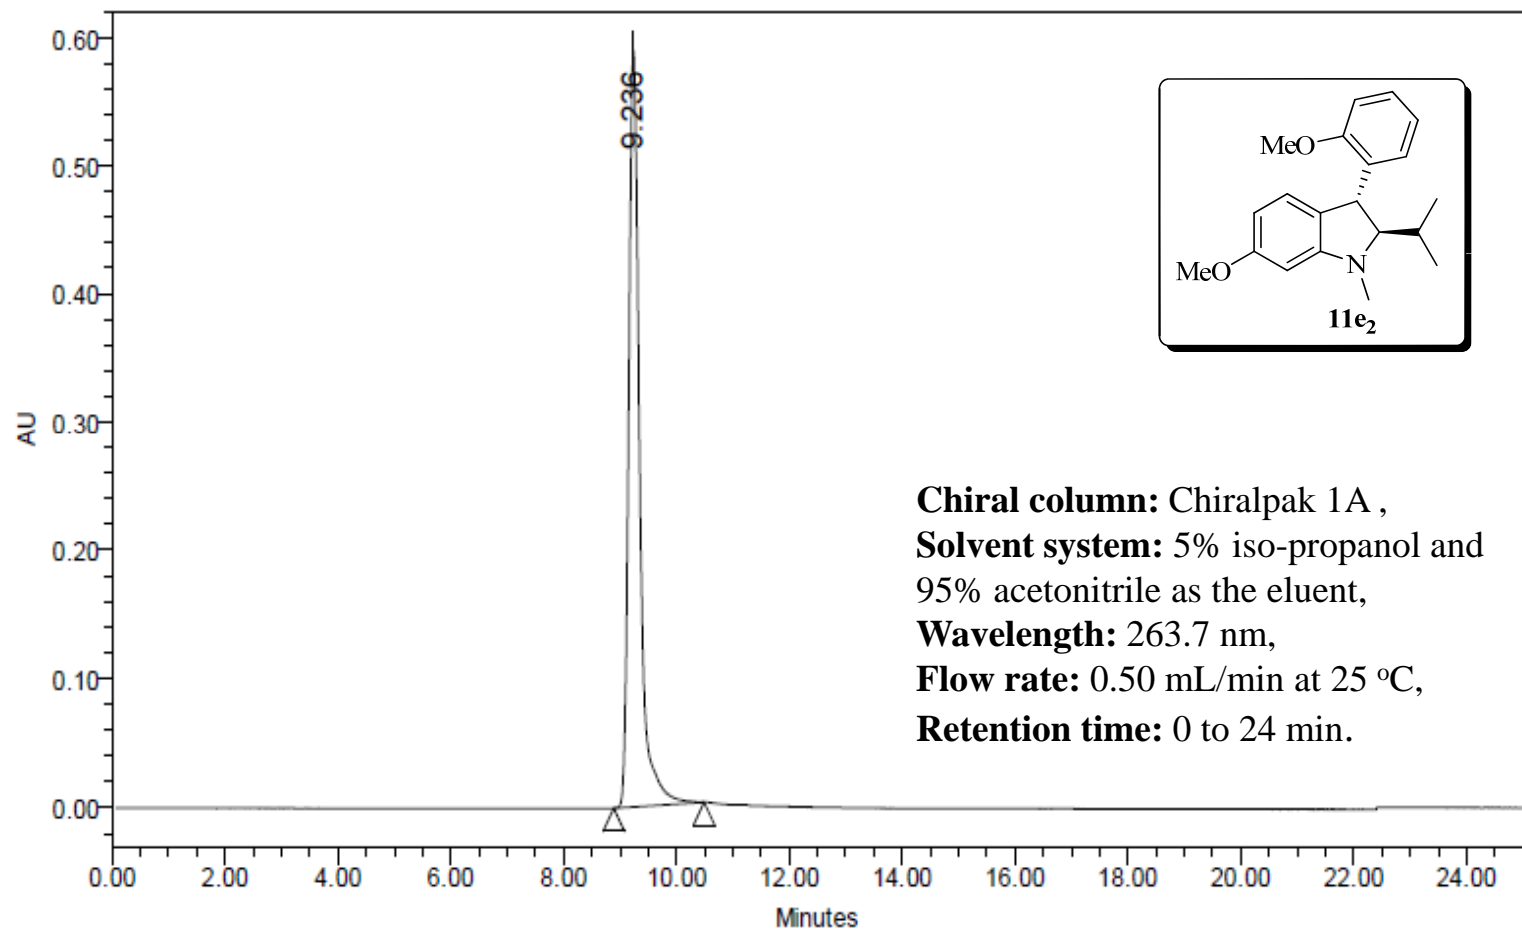

**Figure 107:** HPLC -Spectrum of **11e<sub>2</sub>**.

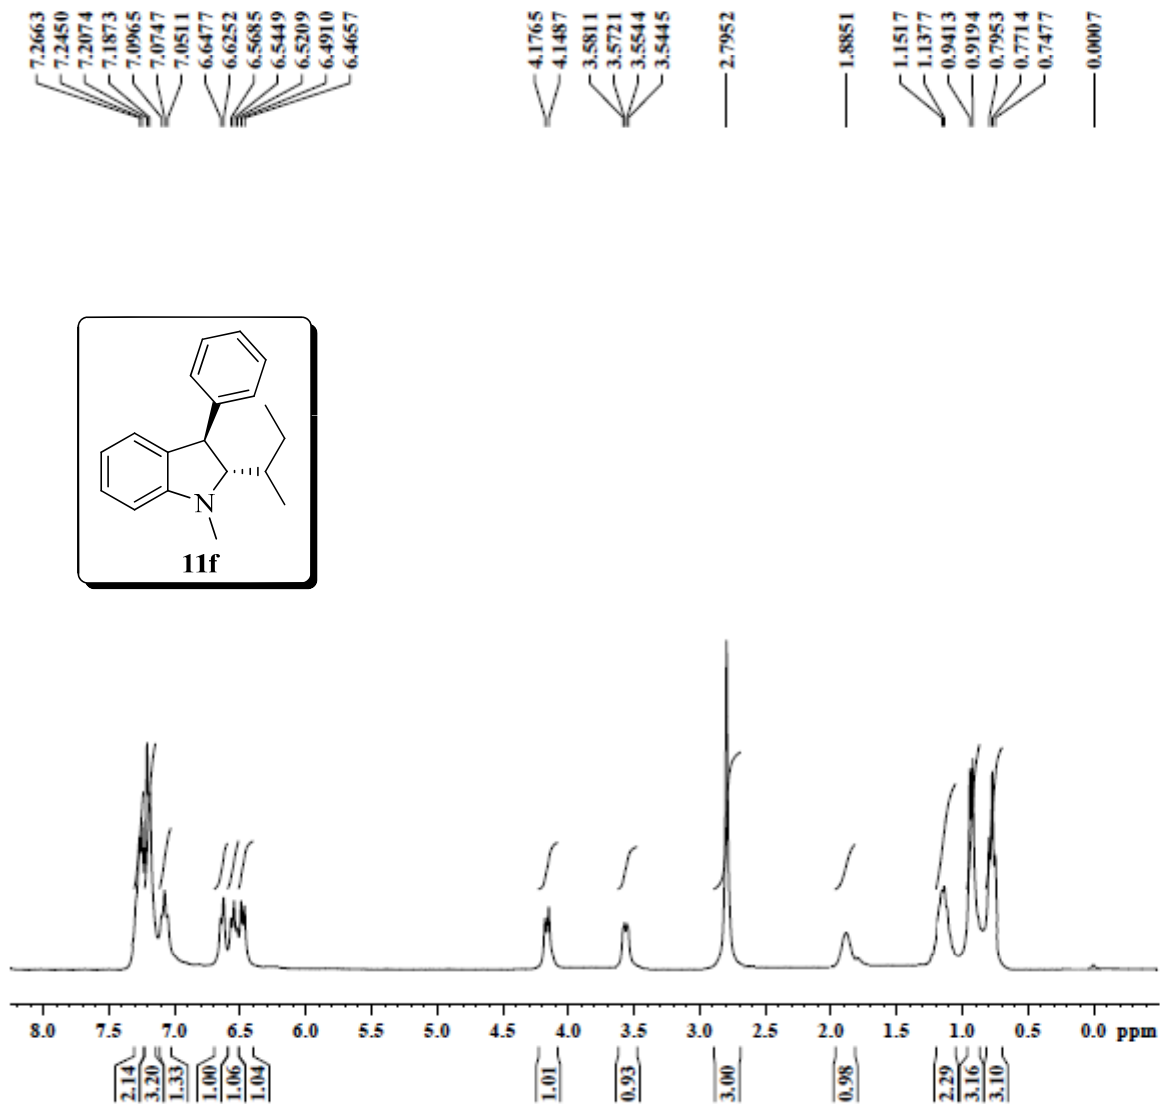

SKM-437  
1H, CDCl3

Current Data Parameters  
NAME SKM-437, 1H, 300 MHz, 8.8.12.M  
EXPNO 350  
PROCNO 1

F2 - Acquisition Parameters  
Date\_ 20120807  
Time 22.20  
INSTRUM spect  
PROBHD 5 mm QNP 1H/13  
PULPROG zg30  
TD 65536  
SOLVENT CDCl3  
NS 8  
DS 0  
SWH 6185.119 Hz  
FIDRES 0.094423 Hz  
AQ 5.293587 sec  
RG 45.2  
DW 80.800 usec  
DE 6.00 usec  
TE 295.0 K  
D1 1.0000000 sec  
TDO 1

===== CHANNEL f1 =====  
NUC1 1H  
P1 11.60 usec  
PL1 -1.00 dB  
SFO1 300.1318534 MHz

F2 - Processing parameters  
SI 32768  
SF 300.1300273 MHz  
WDW EM  
SSB 0  
LB 0.30 Hz  
GB 0  
PC 1.00

Figure 108: <sup>1</sup>H -NMR Spectrum of **11f**.



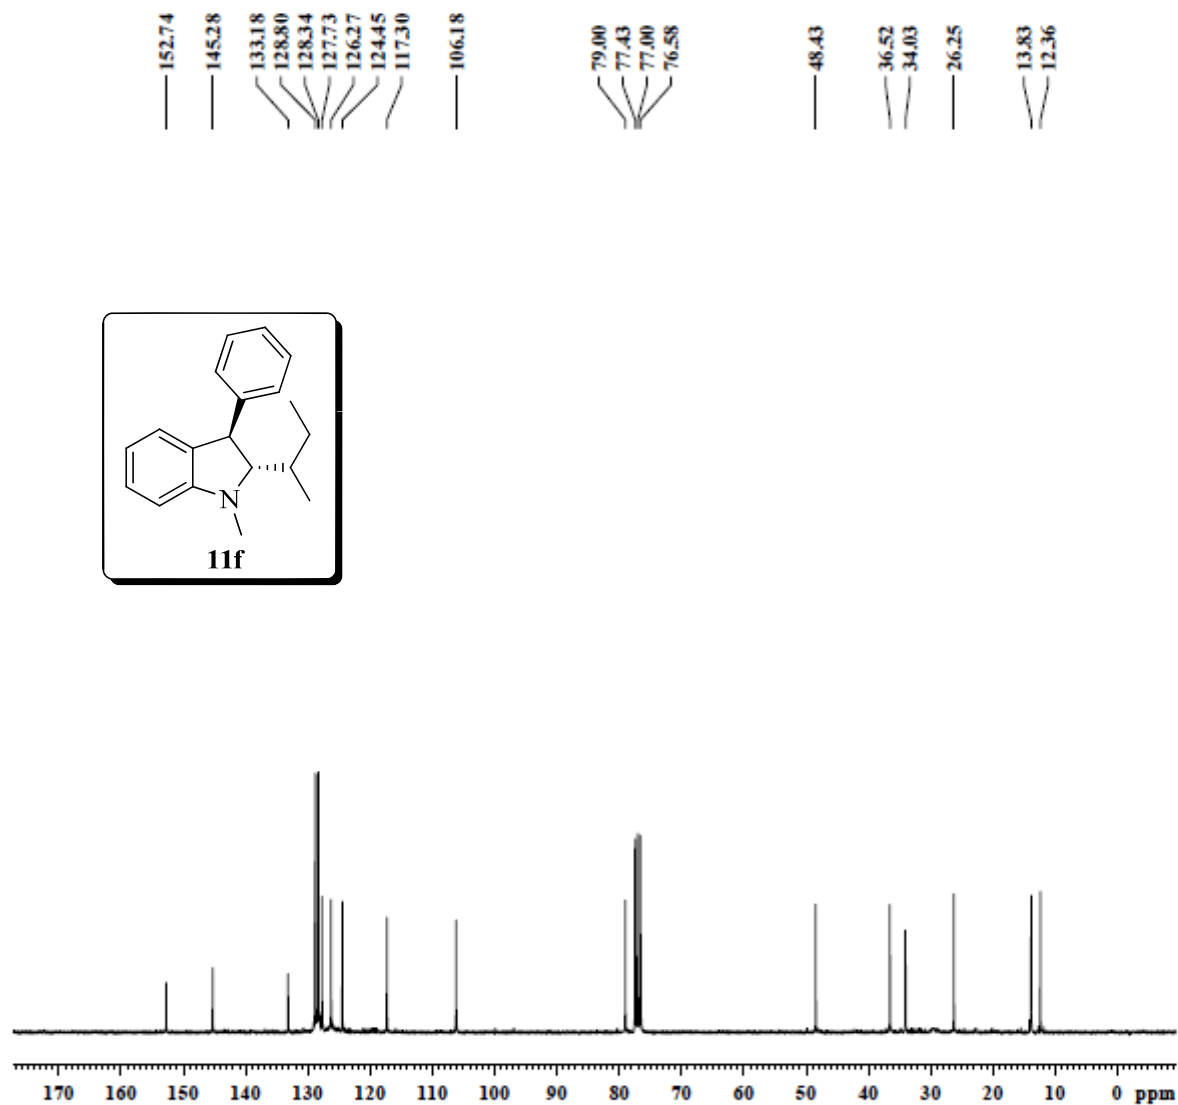

SKM-437  
13C,CDC13

Current Data Parameters  
NAME SKM-437,13C,300 MHz,13.8.12.E  
EXPNO 940  
PROCNO 1

F2 - Acquisition Parameters  
Date\_ 20120814  
Time 1.01  
INSTRUM spect  
PROBHD 5 mm QNP 1H/13  
PULPROG zgpg30  
TD 65536  
SOLVENT CDC13  
NS 2048  
DS 0  
SWH 18028.846 Hz  
FIDRES 0.275098 Hz  
AQ 1.8175818 sec  
RG 10  
DW 27.733 usec  
DE 6.00 usec  
TE 303.0 K  
D1 2.0000000 sec  
d11 0.0300000 sec  
DELTA 1.8999999 sec  
TD0 1

----- CHANNEL f1 -----  
NUC1 13C  
P1 8.70 usec  
PL1 -3.00 dB  
SFO1 75.4752953 MHz

----- CHANNEL f2 -----  
CPDPRG2 waltz16  
NUC2 1H  
PCPD2 60.00 usec  
PL2 -1.00 dB  
PL12 17.00 dB  
PL13 21.00 dB  
SFO2 300.1312005 MHz

F2 - Processing parameters  
SI 32768  
SF 75.4677589 MHz  
WDW EM  
SSB 0  
LB 1.00 Hz  
GB 0  
PC 1.40

Figure 109:  $^{13}\text{C}$  -NMR Spectrum of **11f**.

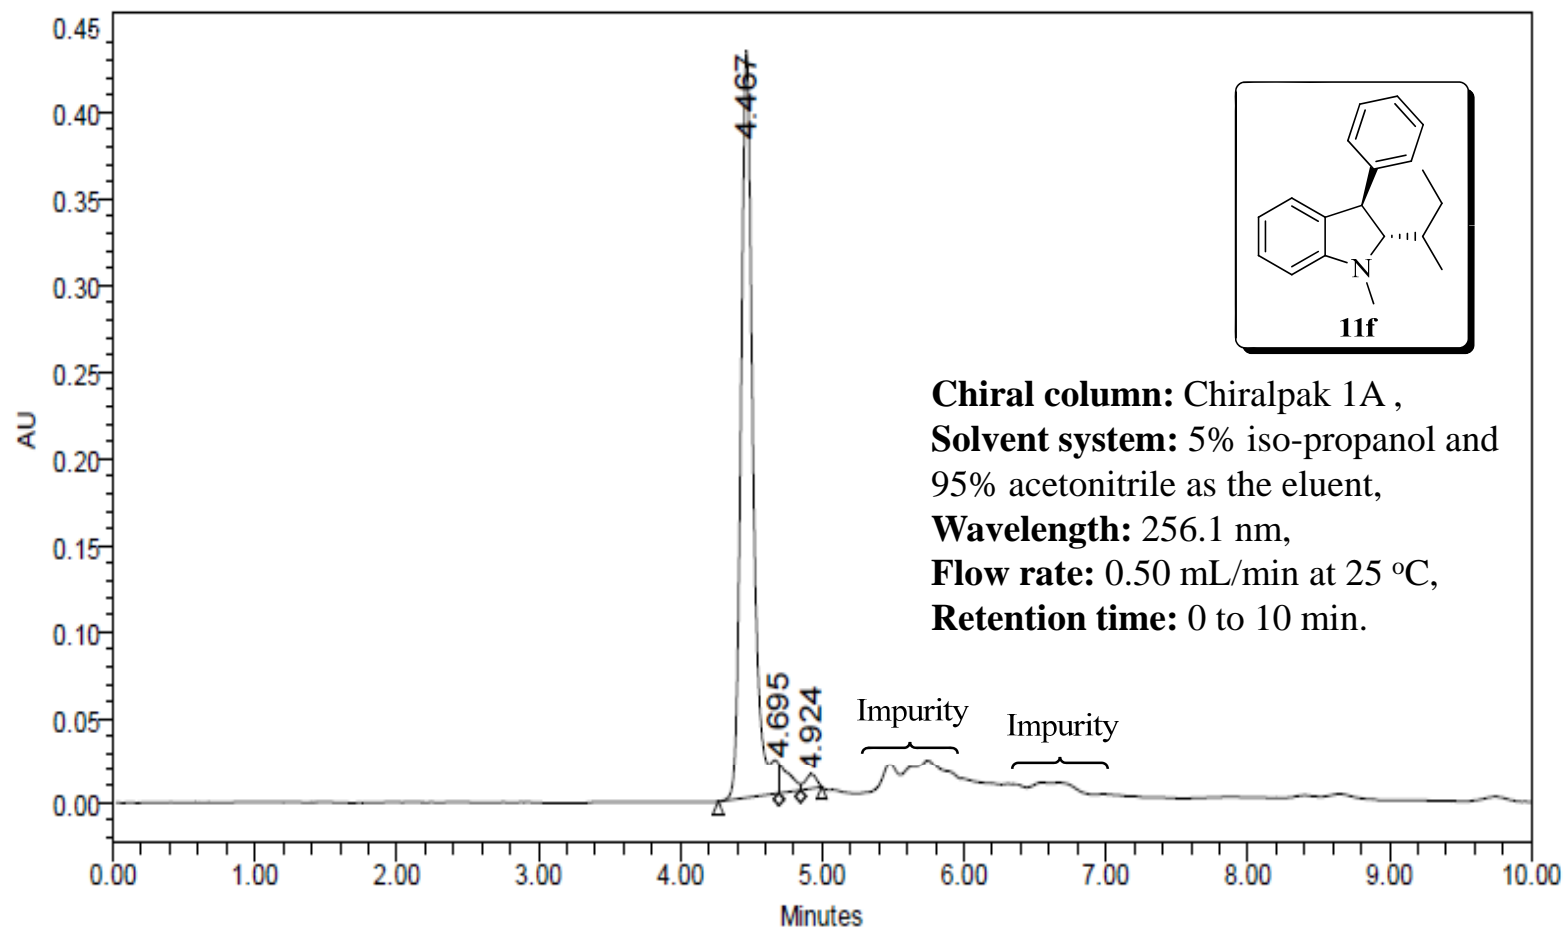

**Figure 110: HPLC -Spectrum of 11f.**

**Note:** The impurity species were collected and found by  $^1\text{H}$  NMR not to contain any isomeric forms of compound **11f**.

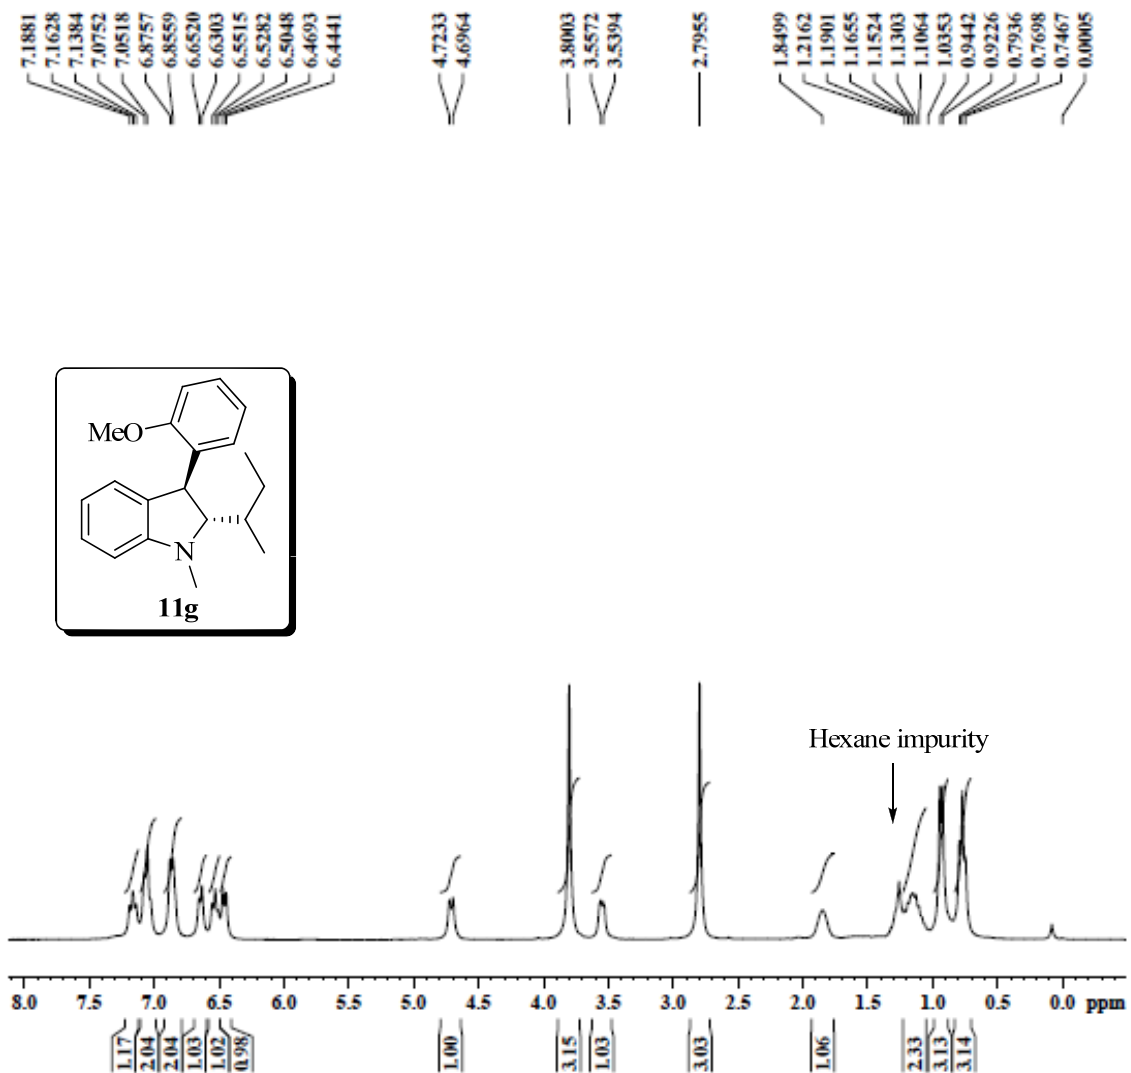

SKM-436  
1H, CDCl3

Current Date Parameters  
 NAME SKM-436.1H.300 MHz.8.8.12.M  
 EXPNO 340  
 PROCNO 1

F2 - Acquisition Parameters  
 Date\_ 20120807  
 Time 22:14  
 INSTRUM spect  
 PROBHD 5 mm QNP 1H13  
 PULPROG zg30  
 TD 65536  
 SOLVENT CDCl3  
 NS 8  
 DS 0  
 SWH 6186.119 Hz  
 FIDRES 0.034423 Hz  
 AQ 5.2953567 sec  
 RG 403  
 DW 80.800 usec  
 DE 6.00 usec  
 TE 298.0 K  
 D1 1.00000000 sec  
 TDD 1

\*\*\*\*\* CHANNEL f1 \*\*\*\*\*  
 NUC1 1H  
 P1 11.80 usec  
 PL1 -1.00 dB  
 SFO1 300.1318534 MHz

F2 - Processing parameters  
 SI 32768  
 SF 300.1300281 MHz  
 WDW EM  
 SSB 0  
 LB 0.30 Hz  
 GB 0  
 PC 1.00

Figure 111: <sup>1</sup>H -NMR Spectrum of **11g**.

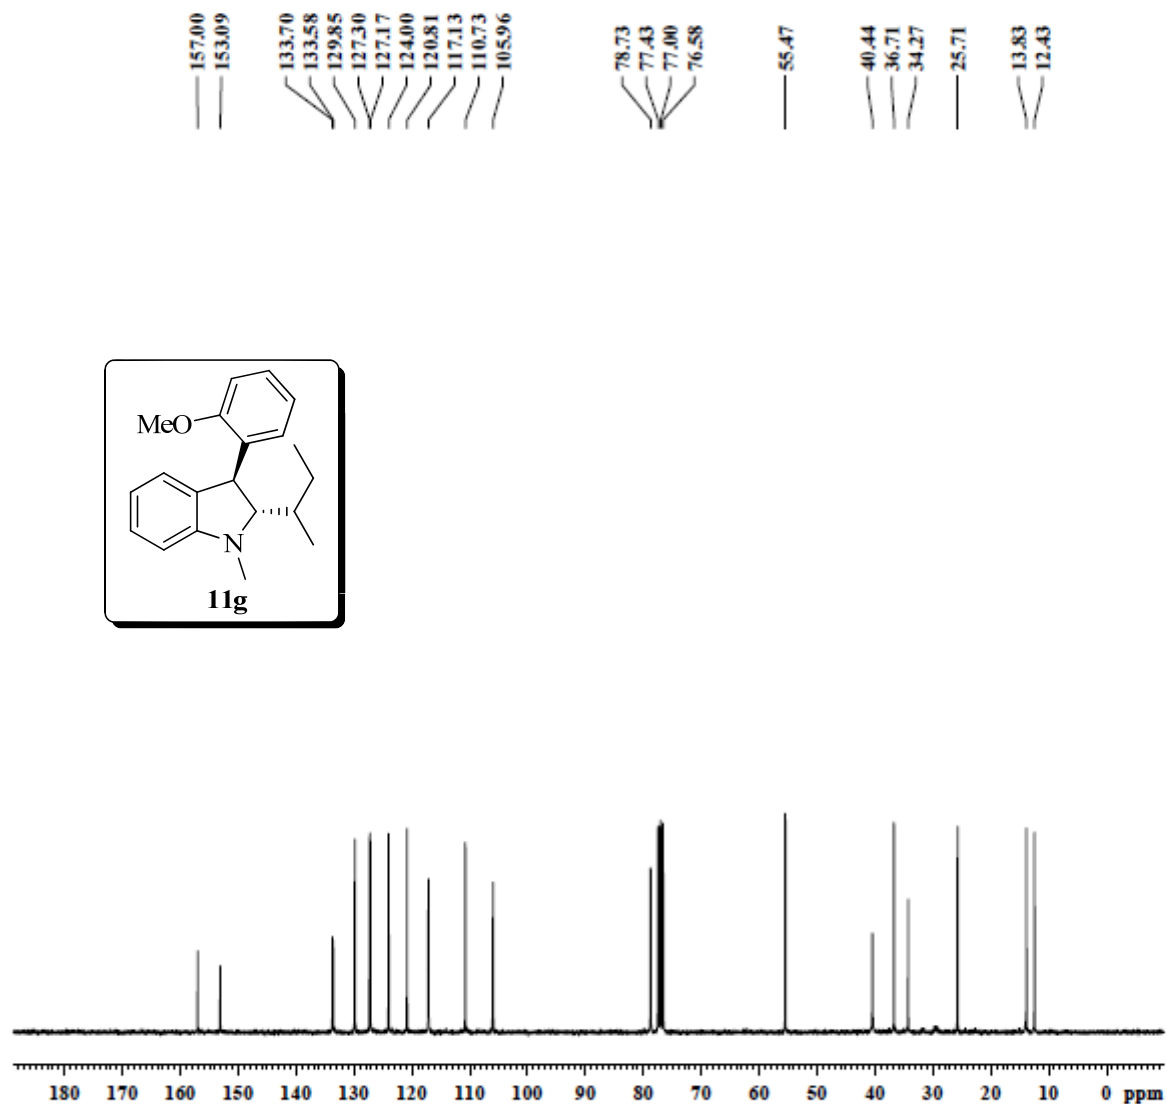

Figure 112:  $^{13}\text{C}$  -NMR Spectrum of **11g**.

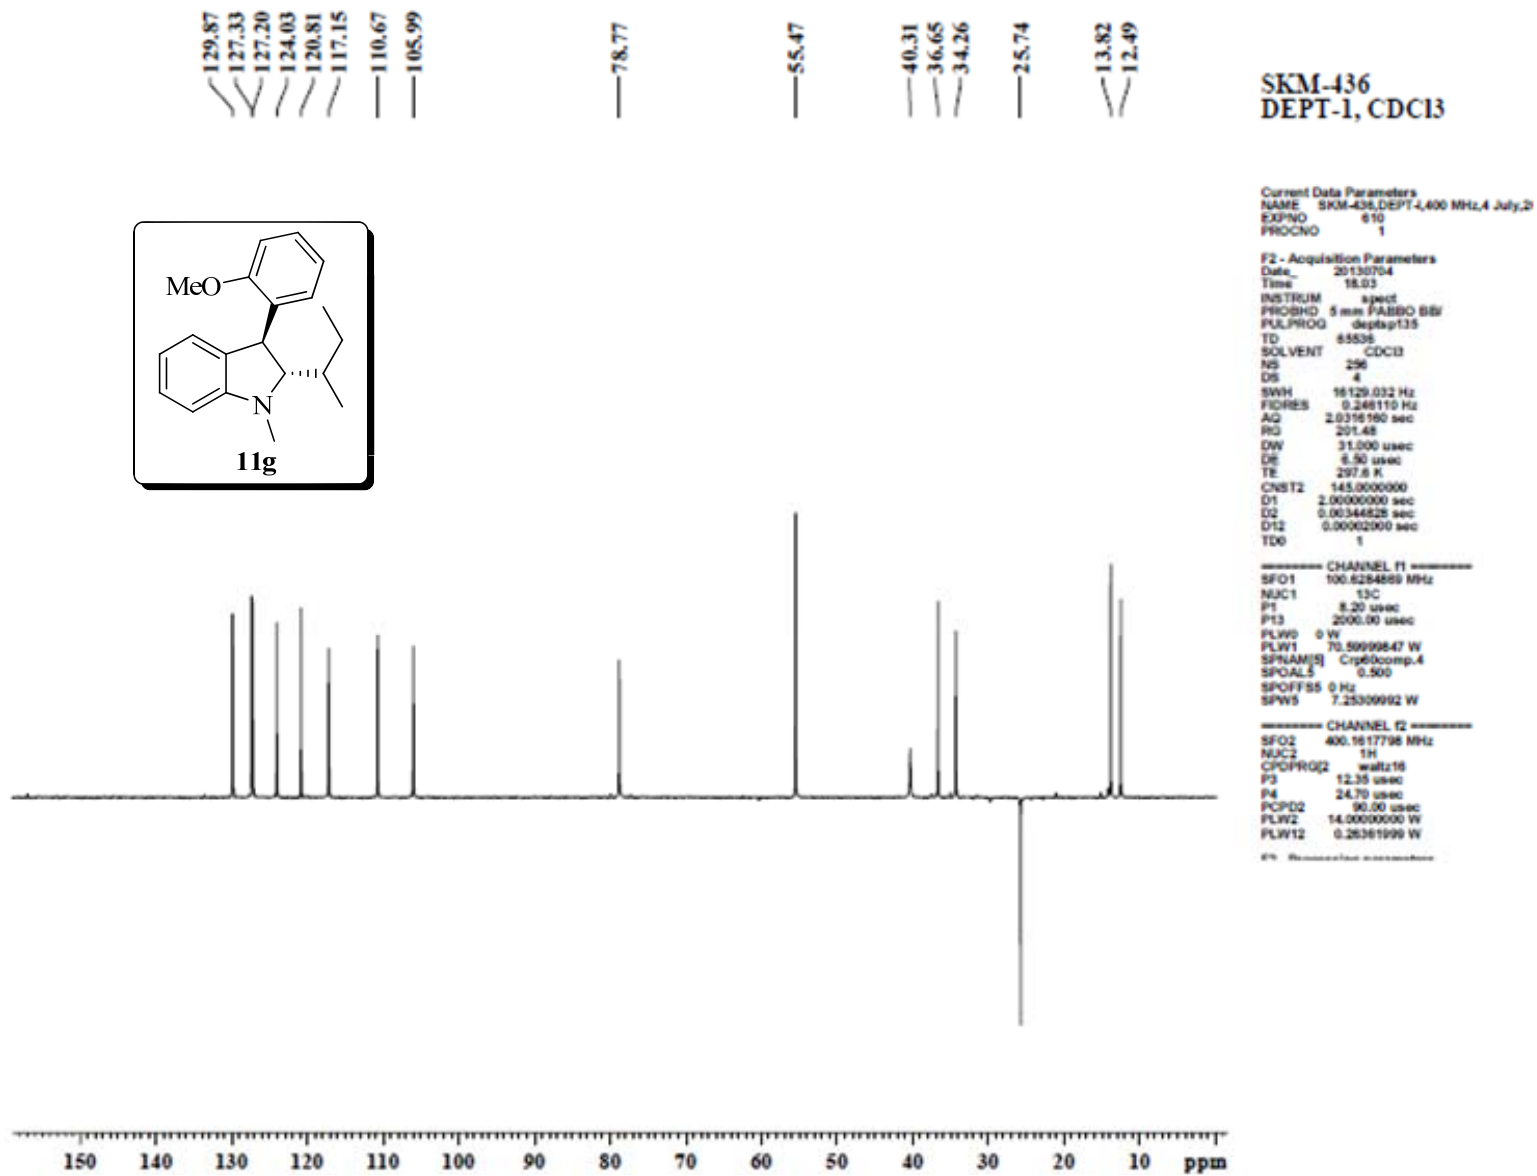

**Figure 113: DEPT-I -Spectrum of 11g.**

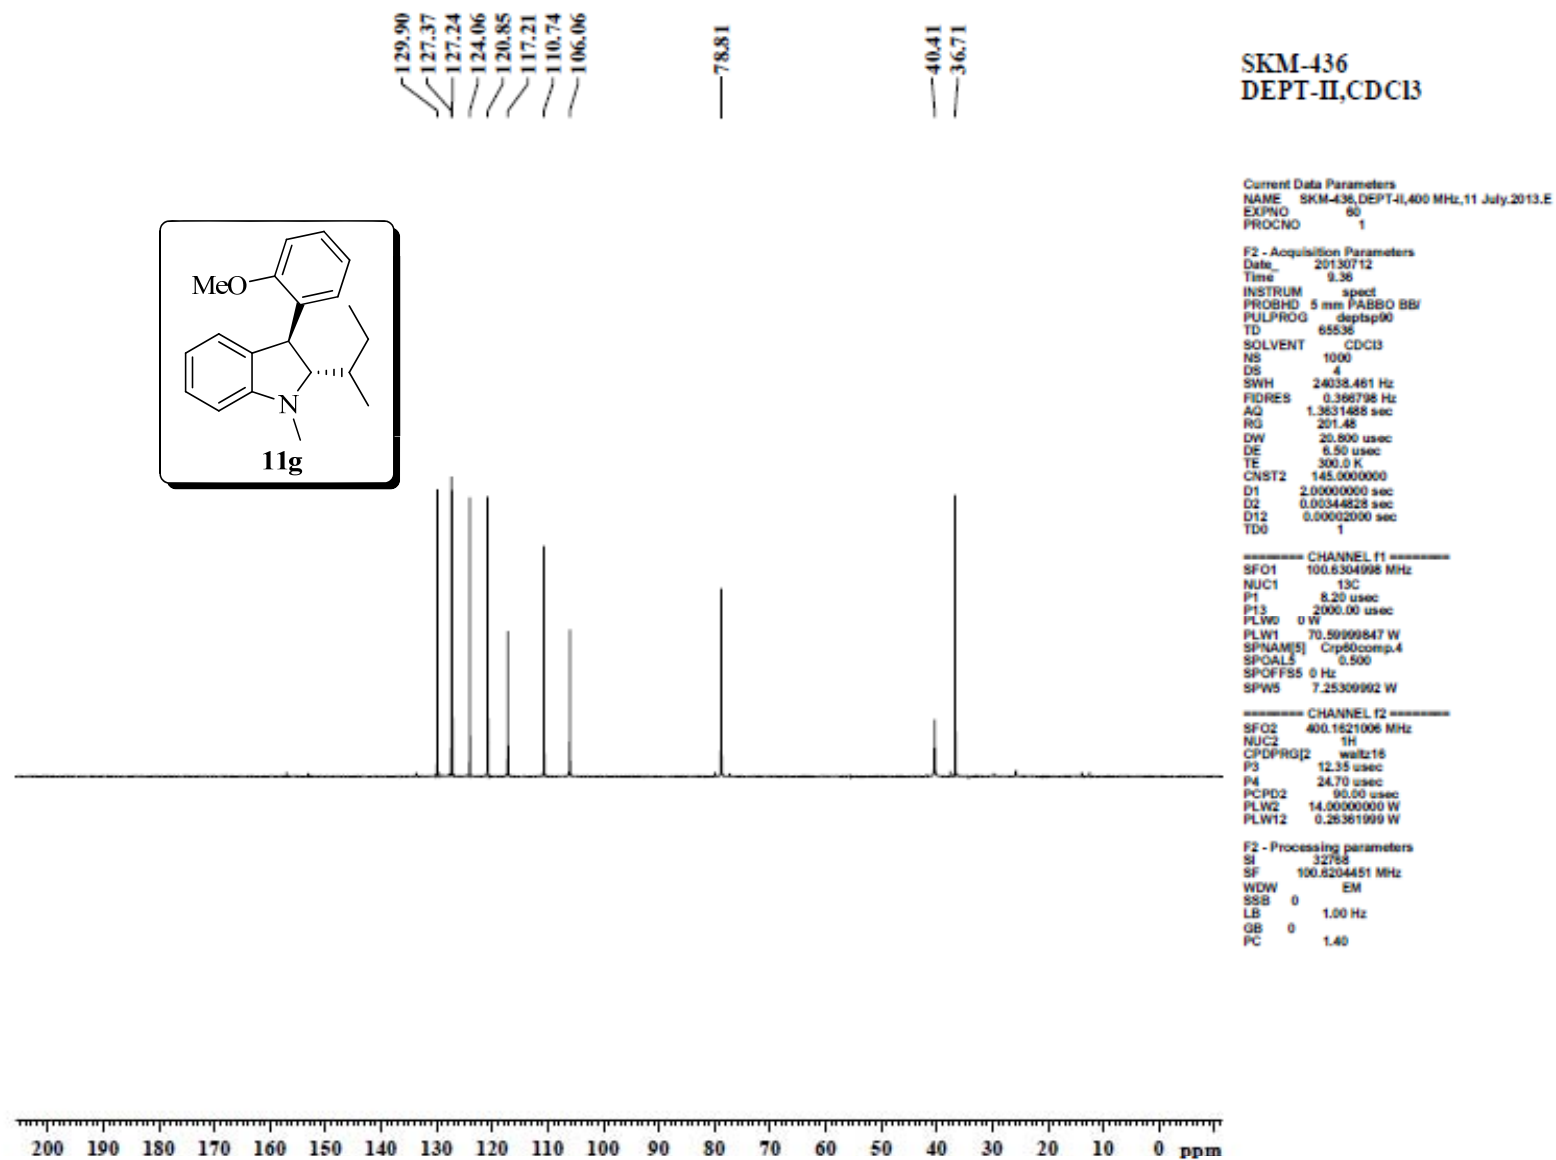

Figure 114: DEPT-II -Spectrum of **11g**.

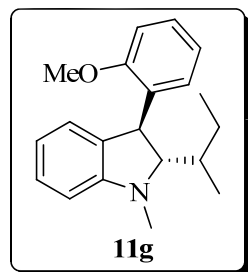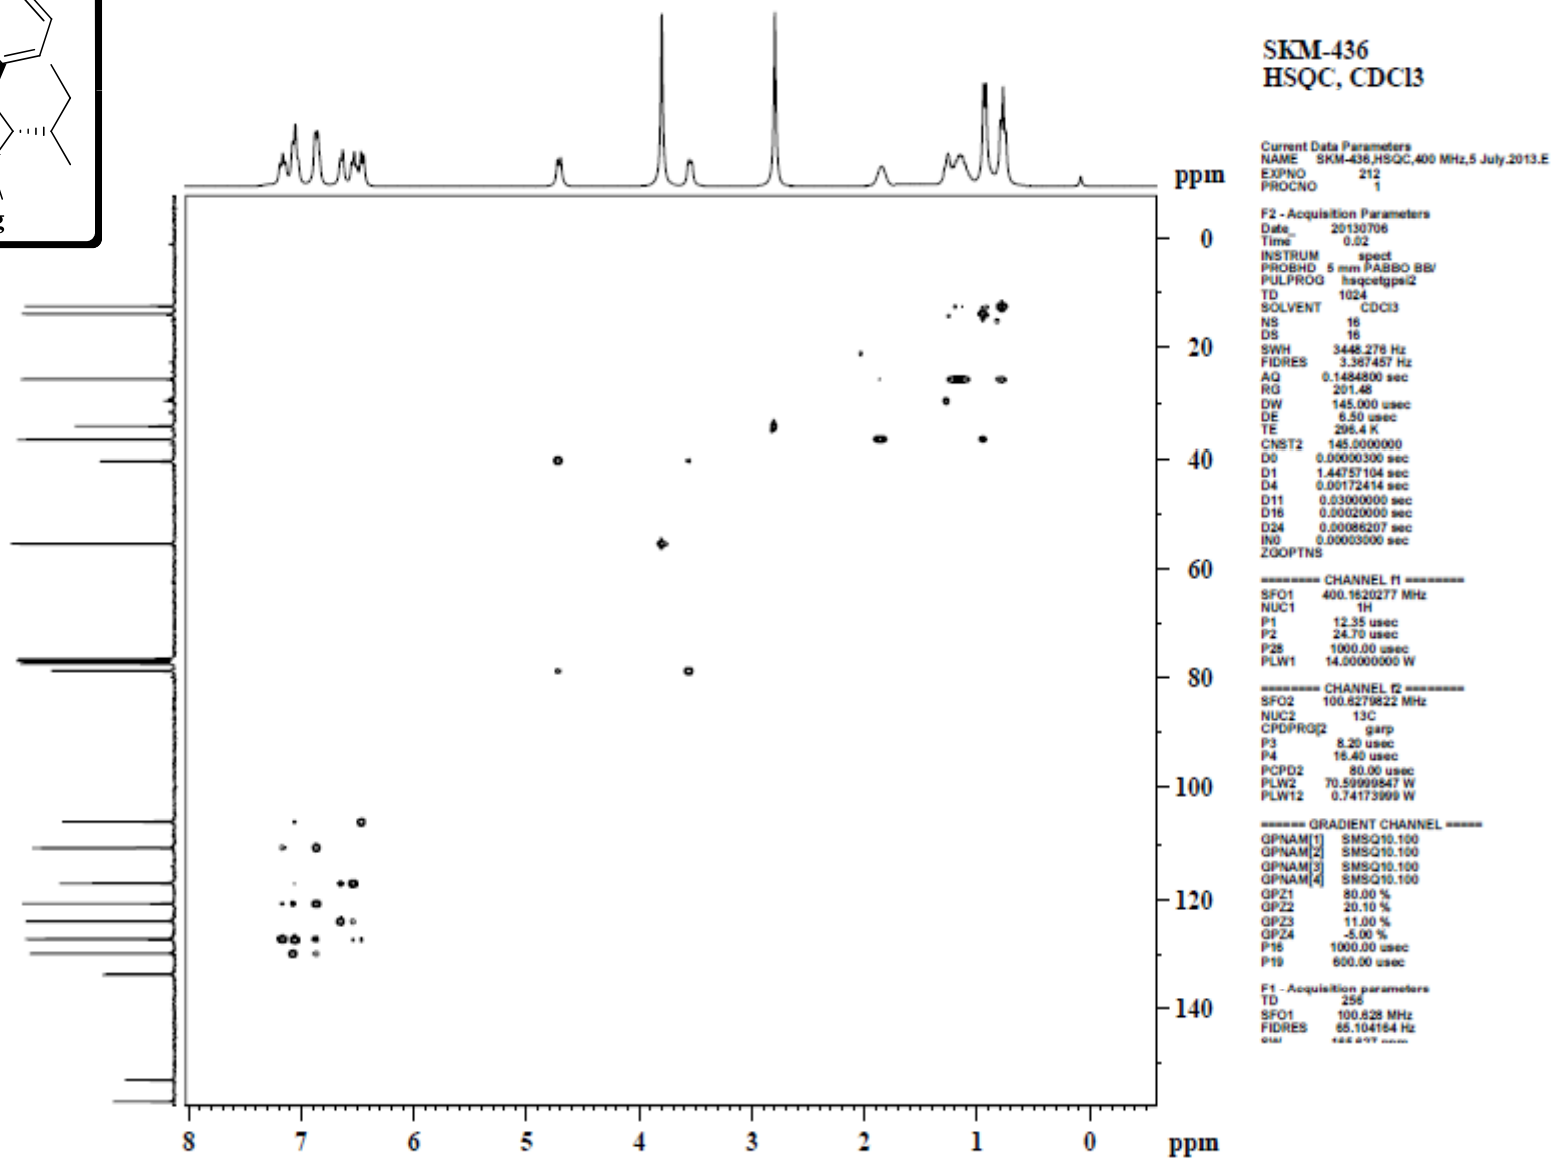

**Figure 115: HSQC -Spectrum of 11g.**

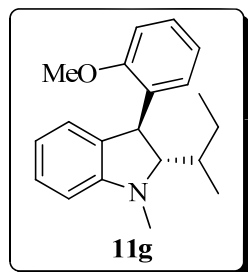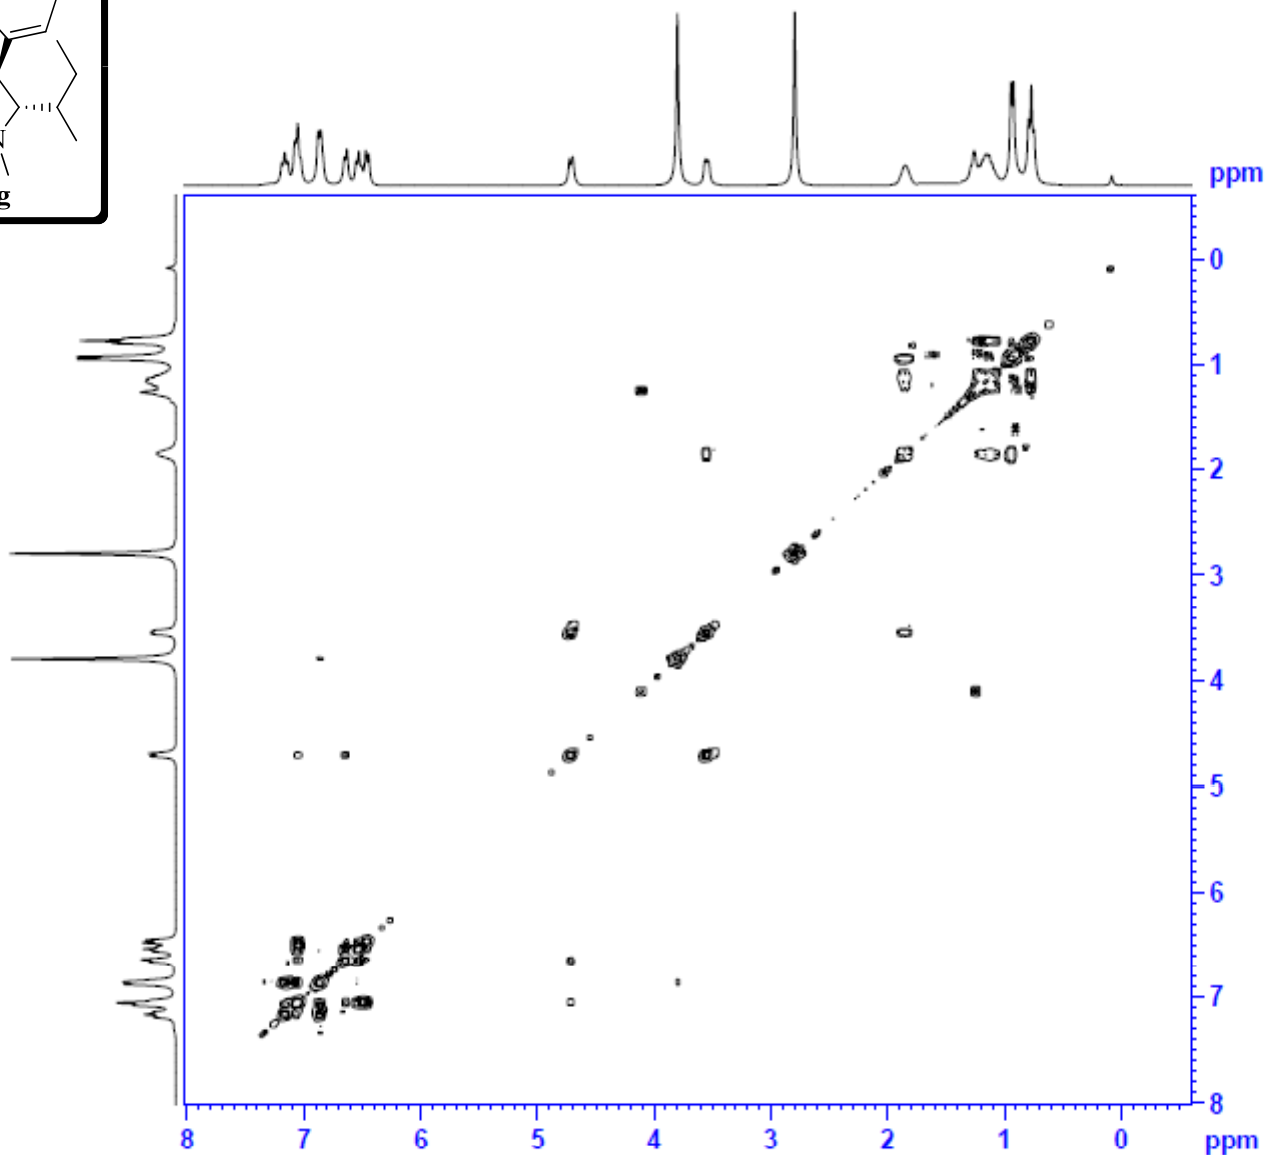

**SKM-436**  
**COSY, CDC13**

Current Data Parameters  
NAME SKM-436,COSY\_400 MHz,5 July:  
EXPNO 211  
PROCNO 1

F2 - Acquisition Parameters  
Date\_ 20130705  
Time 22:44  
INSTRUM spect  
PROBHD 5 mm PABBO BB/  
PULPROG cosygpppqf  
TD 2048  
SOLVENT CDC13  
NS 16  
DS 8  
SWH 3448.276 Hz  
FIDRES 1.883728 Hz  
AQ 0.2969600 sec  
RG 11.42  
DW 145.000 usec  
DE 8.50 usec  
TE 296.5 K  
D0 0.00000300 sec  
D1 1.89473295 sec  
D11 0.03000000 sec  
D12 0.00002000 sec  
D13 0.00000400 sec  
D16 0.00020000 sec  
IN0 0.00020000 sec

----- CHANNEL f1 -----  
SFO1 400.1820277 MHz  
NUC1 1H  
P0 12.35 usec  
P1 12.35 usec  
P17 2500.00 usec  
PLW1 14.00000000 W  
PLW10 3.15879989 W

----- GRADIENT CHANNEL -----  
GPNAM(1) SMSQ10.100  
GPZ1 10.00 %  
P18 1000.00 usec

F1 - Acquisition parameters  
TD 128  
SFO1 400.162 MHz  
FIDRES 26.939655 Hz  
SW 8.817 ppm  
FMODE G

F2 - Processing parameters  
SI 1024  
SF 400.1605427 MHz  
WDW QSINE  
SSB 0

**Figure 116: COSY -Spectrum of 11g.**



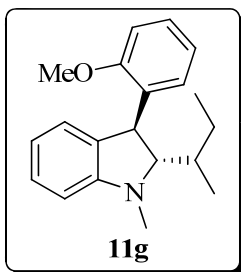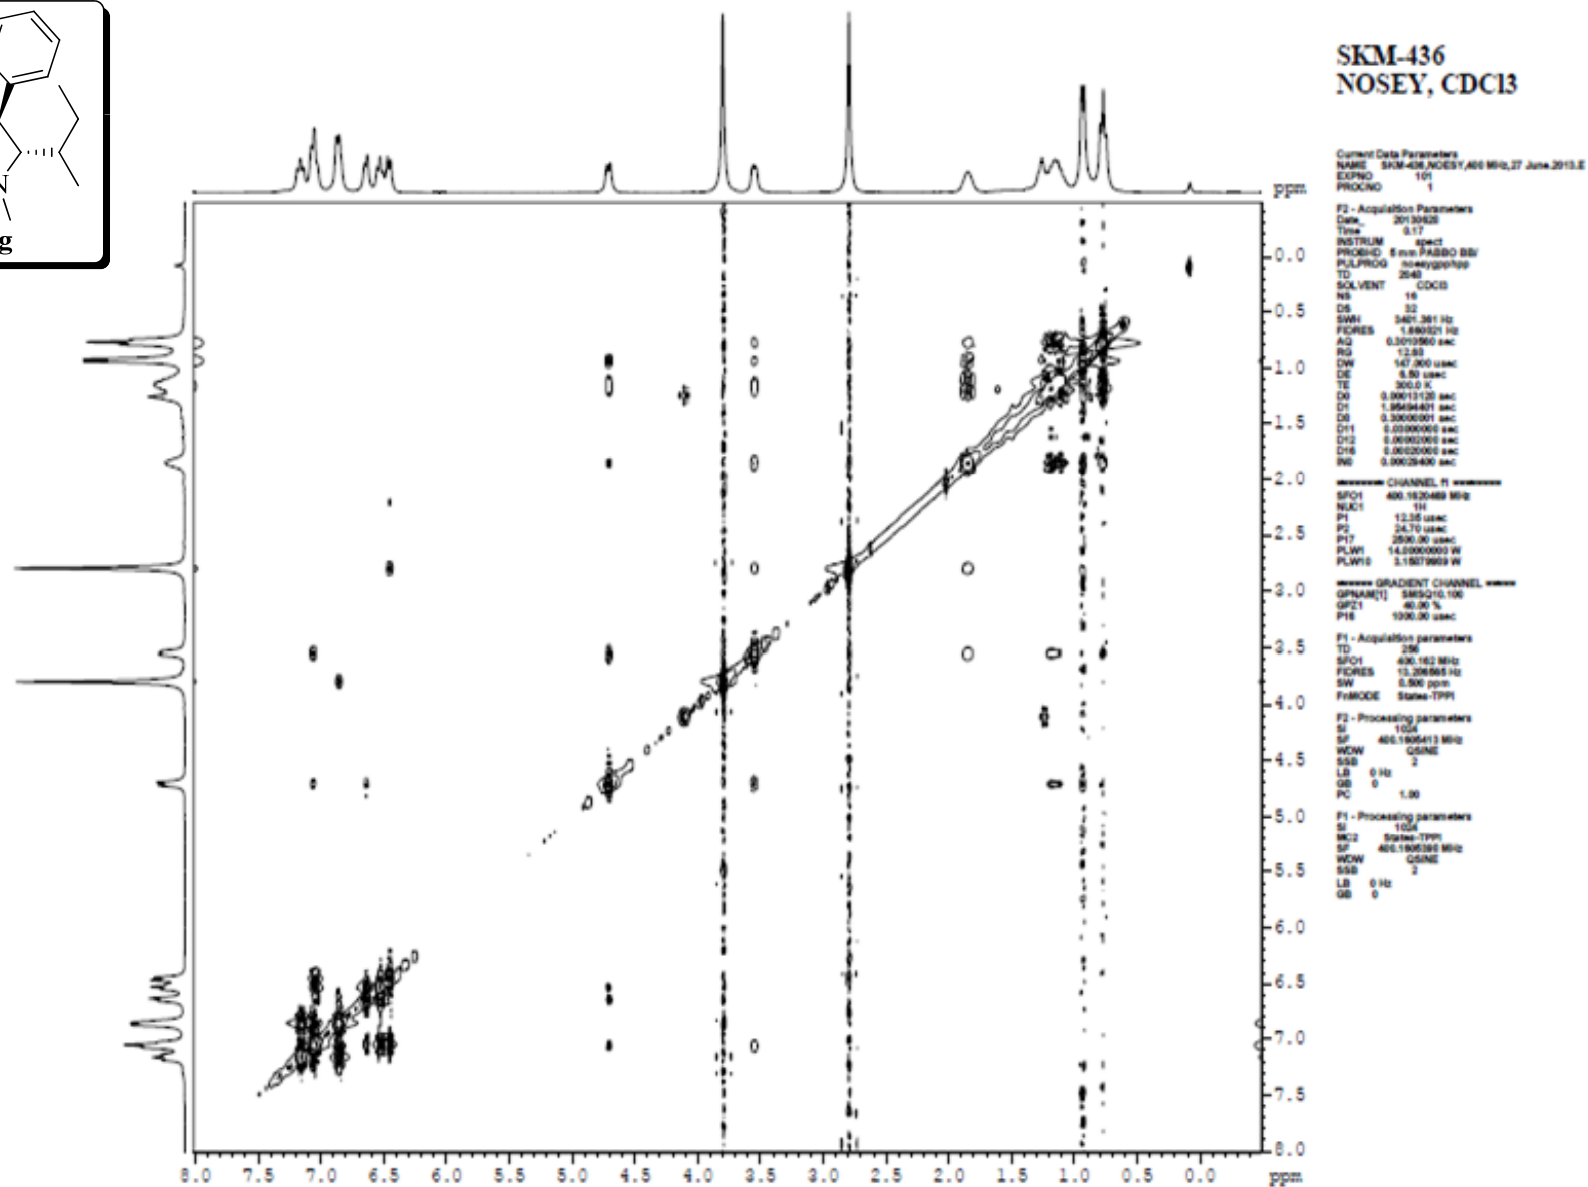

**Figure 117: NOESY -Spectrum of 11g.**

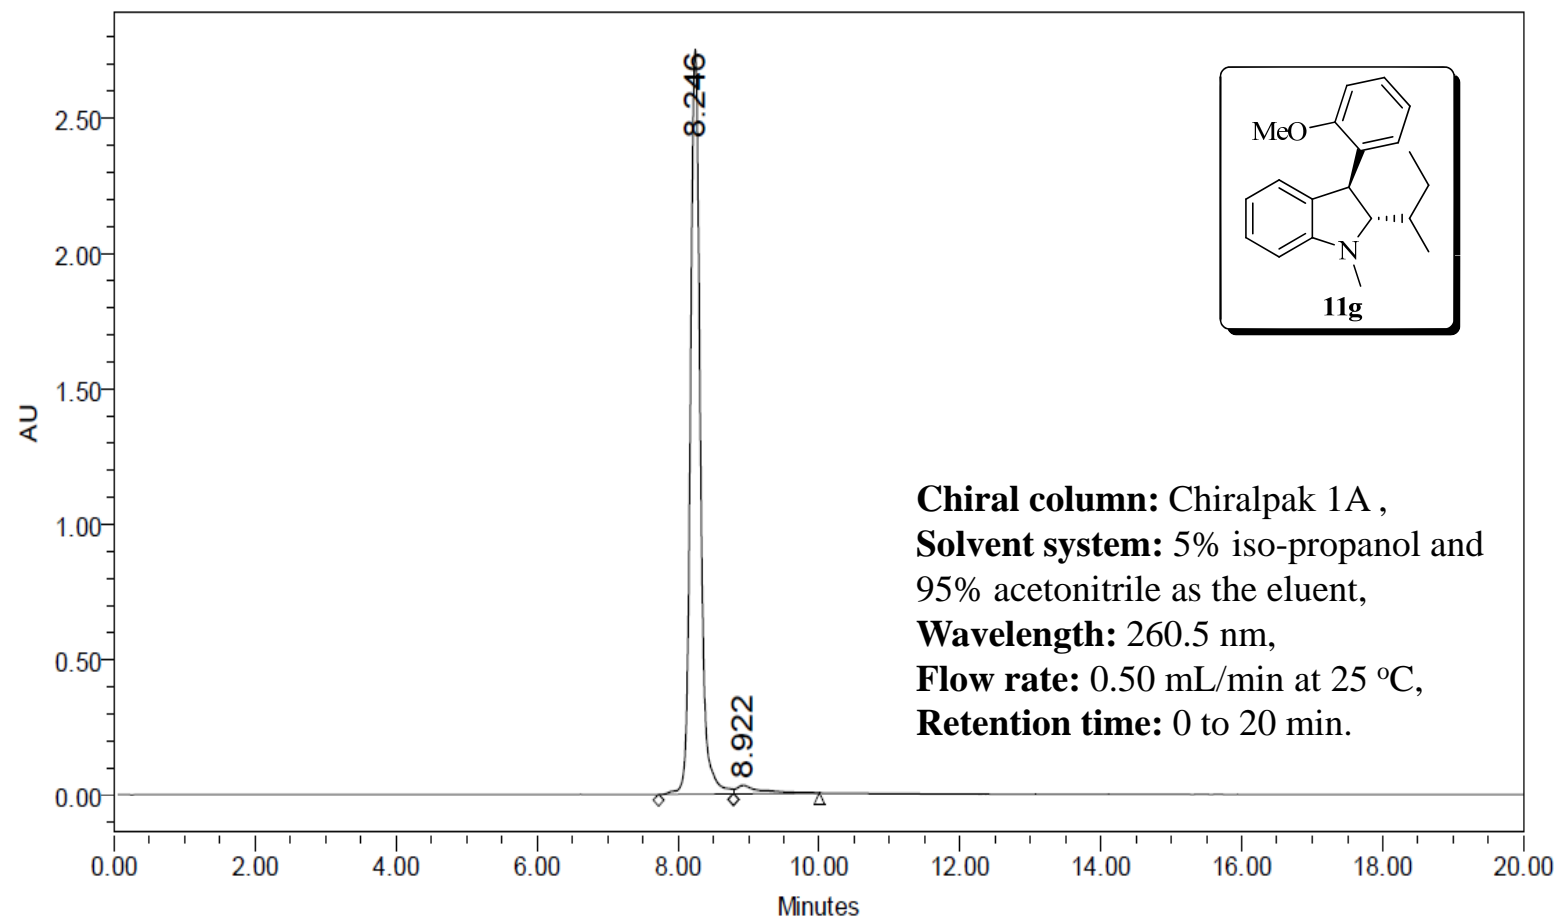

**Figure 118:** HPLC -Spectrum of **11g**.

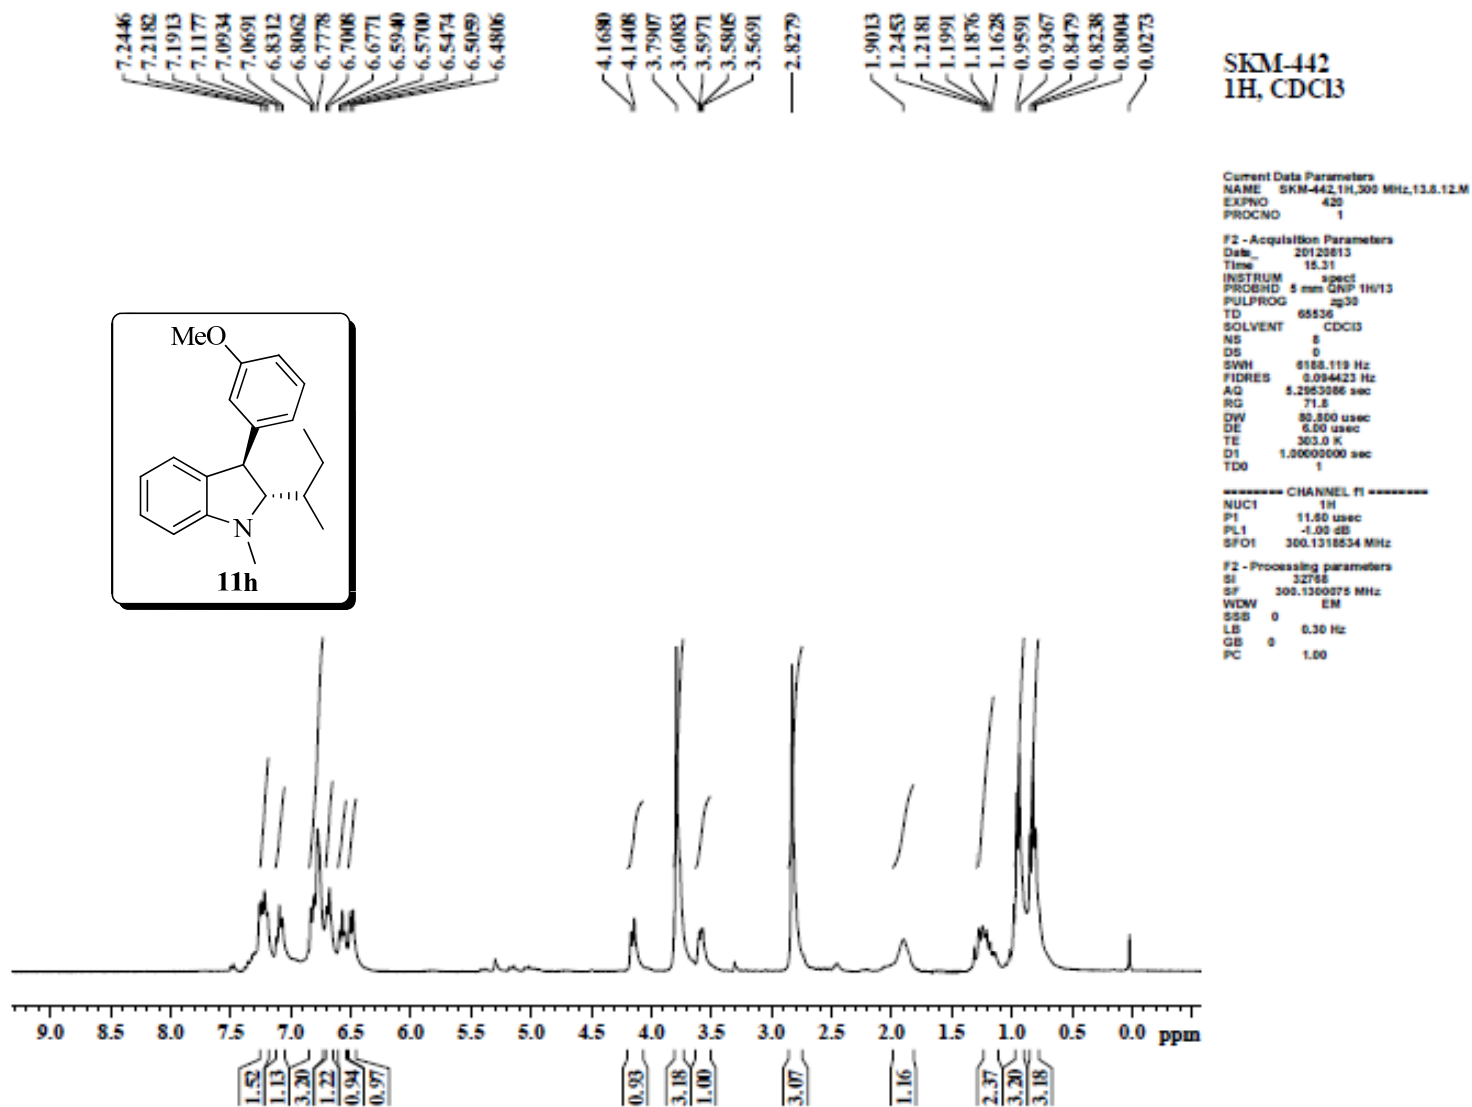

**Figure 119:**  $^1\text{H}$  -NMR Spectrum of **11h**.

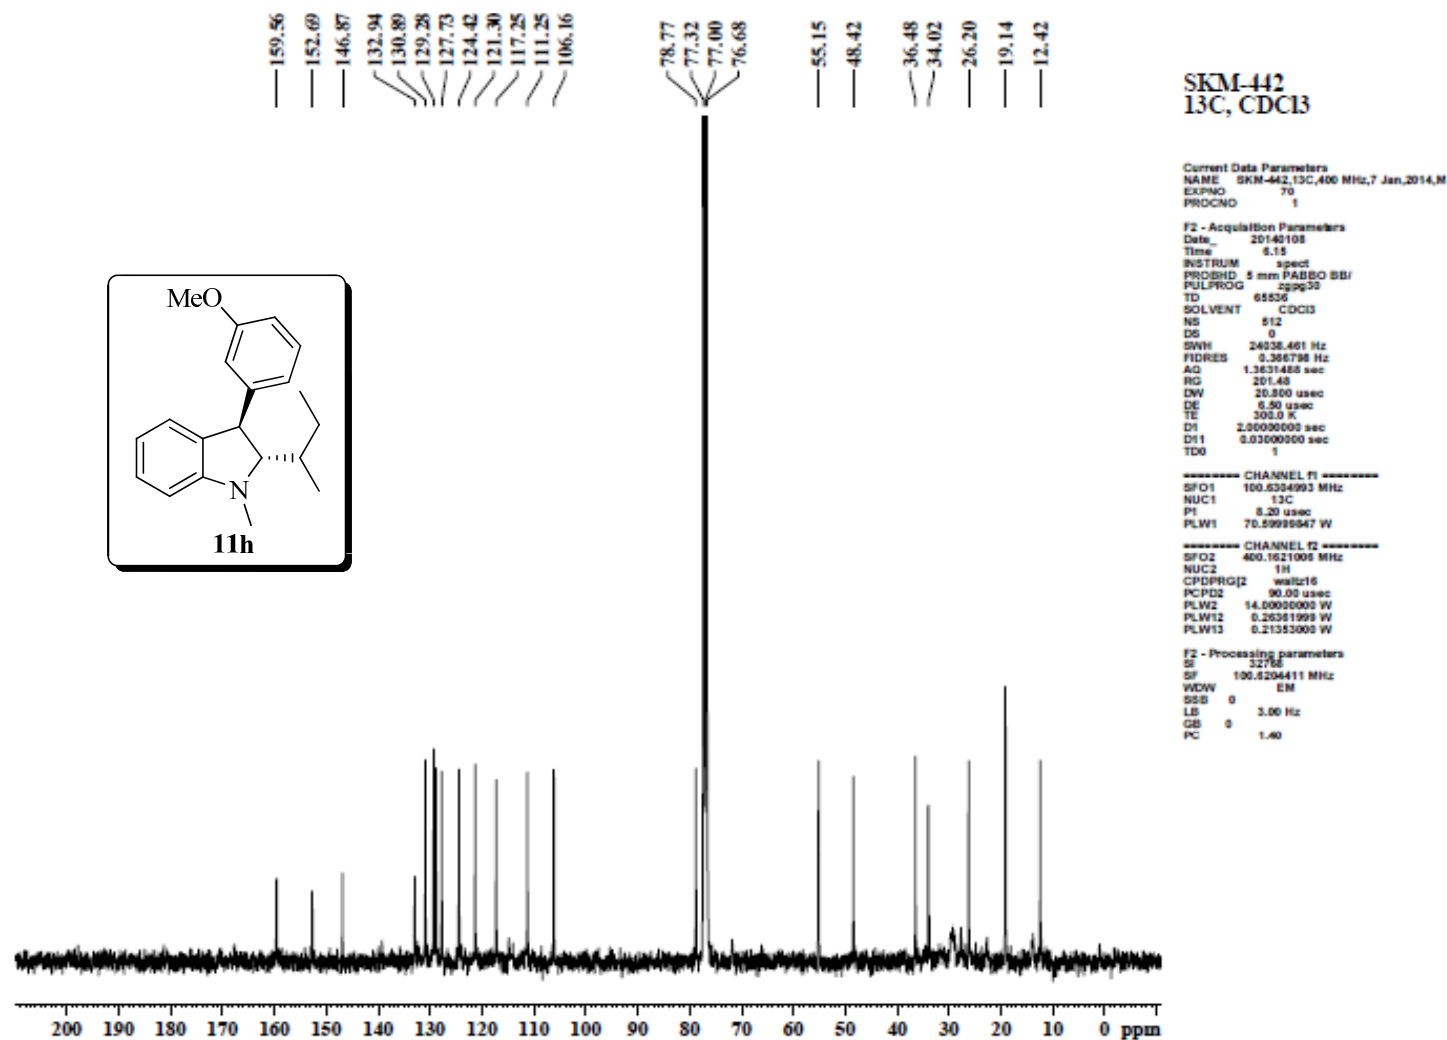

**Figure 120:**  $^{13}\text{C}$ -NMR Spectrum of **11h**.

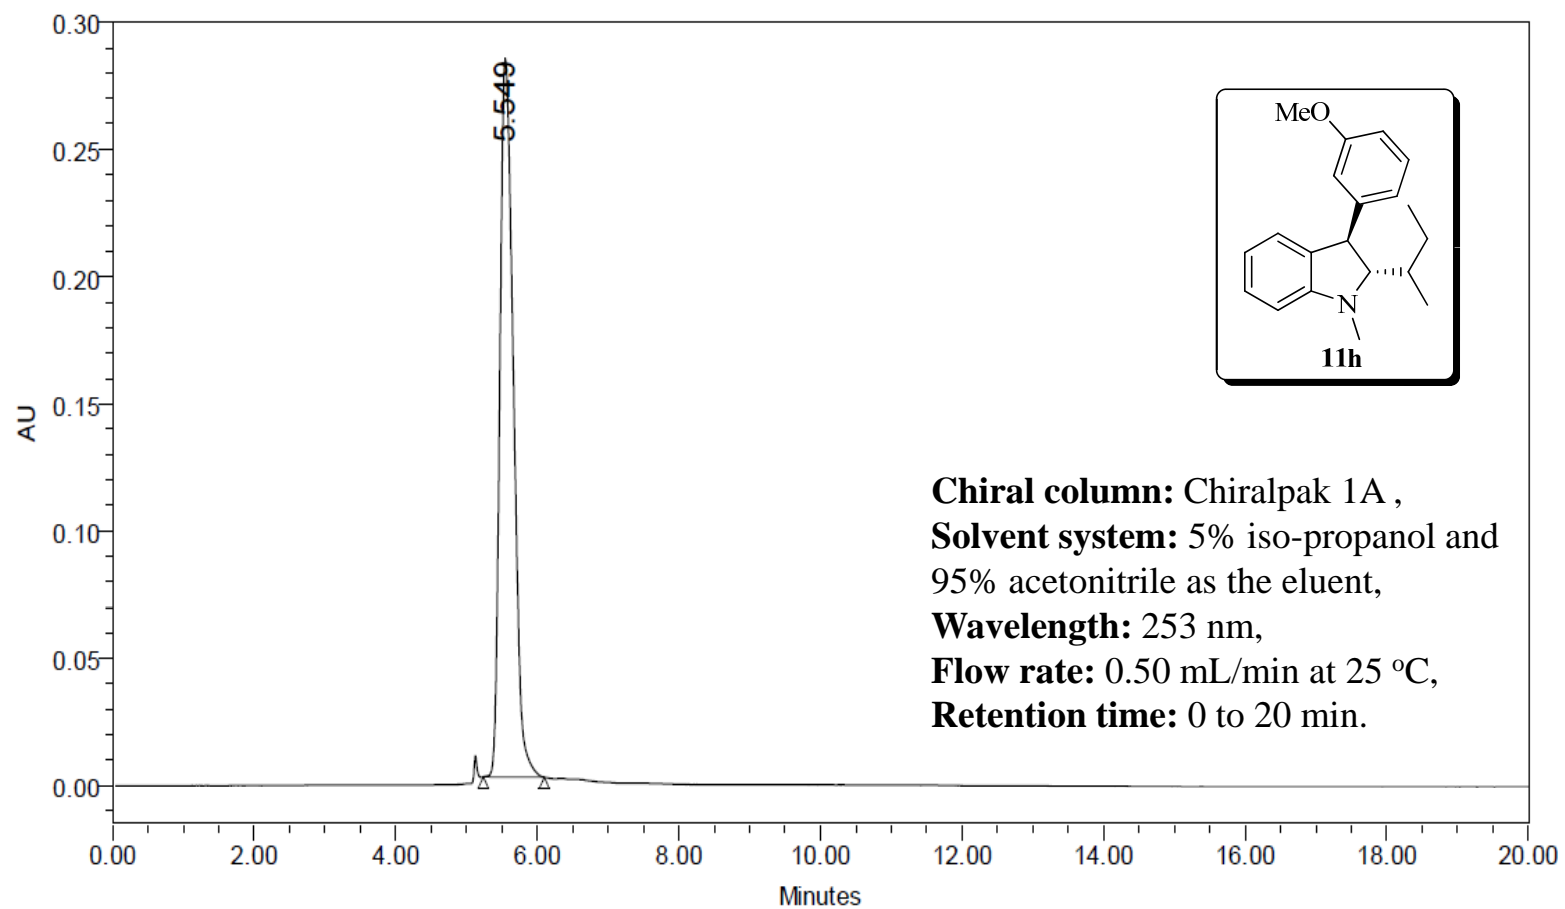

**Figure 121:** HPLC -Spectrum of **11h**.

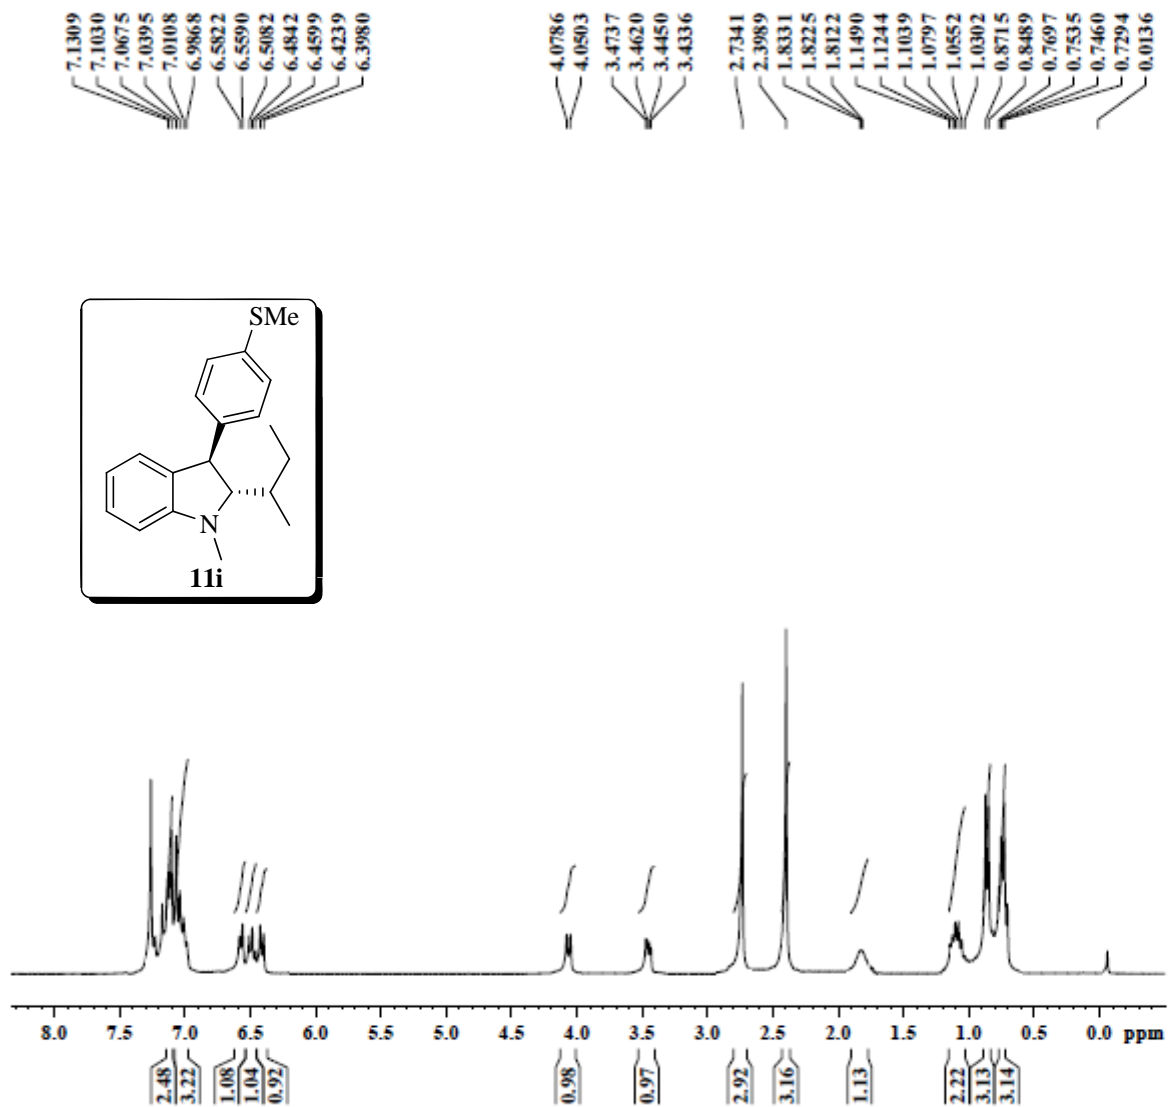

SKM-443  
1H, CDCl3

Current Data Parameters  
NAME SKM-443.1H,300 MHz,16.5.12.M  
EXPNO 370  
PROCNO 1

F2 - Acquisition Parameters  
Date\_ 20120816  
Time 17.50  
INSTRUM spect  
PROBHD 5 mm QNP 1H/13  
PULPROG zg30  
TD 65536  
SOLVENT CDCl3  
NS 8  
DS 0  
SWH 6188.119 Hz  
FIDRES 0.004423 Hz  
AQ 5.2953567 sec  
RG 80.5  
DW 80.800 usec  
DE 6.00 usec  
TE 303.0 K  
D1 1.00000000 sec  
TD0 1

===== CHANNEL f1 =====  
NUC1 1H  
P1 11.60 usec  
PL1 -1.50 dB  
SFO1 300.1318534 MHz

F2 - Processing parameters  
SI 32768  
SF 300.1300321 MHz  
WDW EM  
SSB 0  
LB 0.30 Hz  
GB 0  
PC 1.00

Figure 122: <sup>1</sup>H -NMR Spectrum of **11i**.

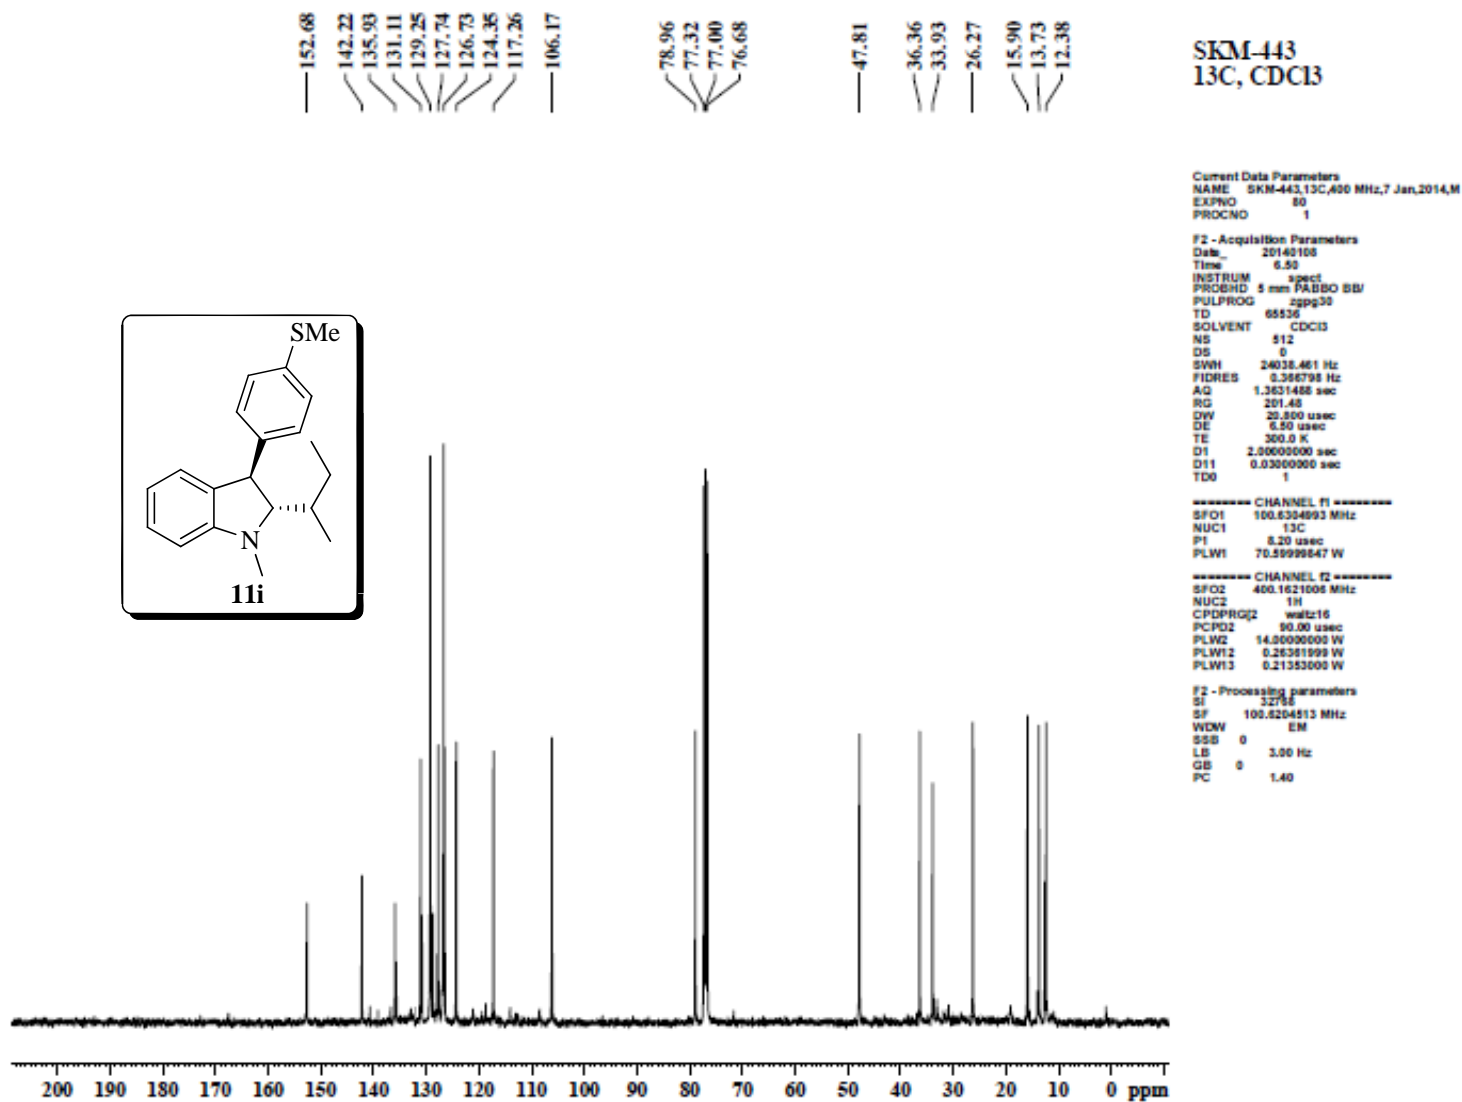

Figure 123:  $^{13}\text{C}$  -NMR Spectrum of **11i**.

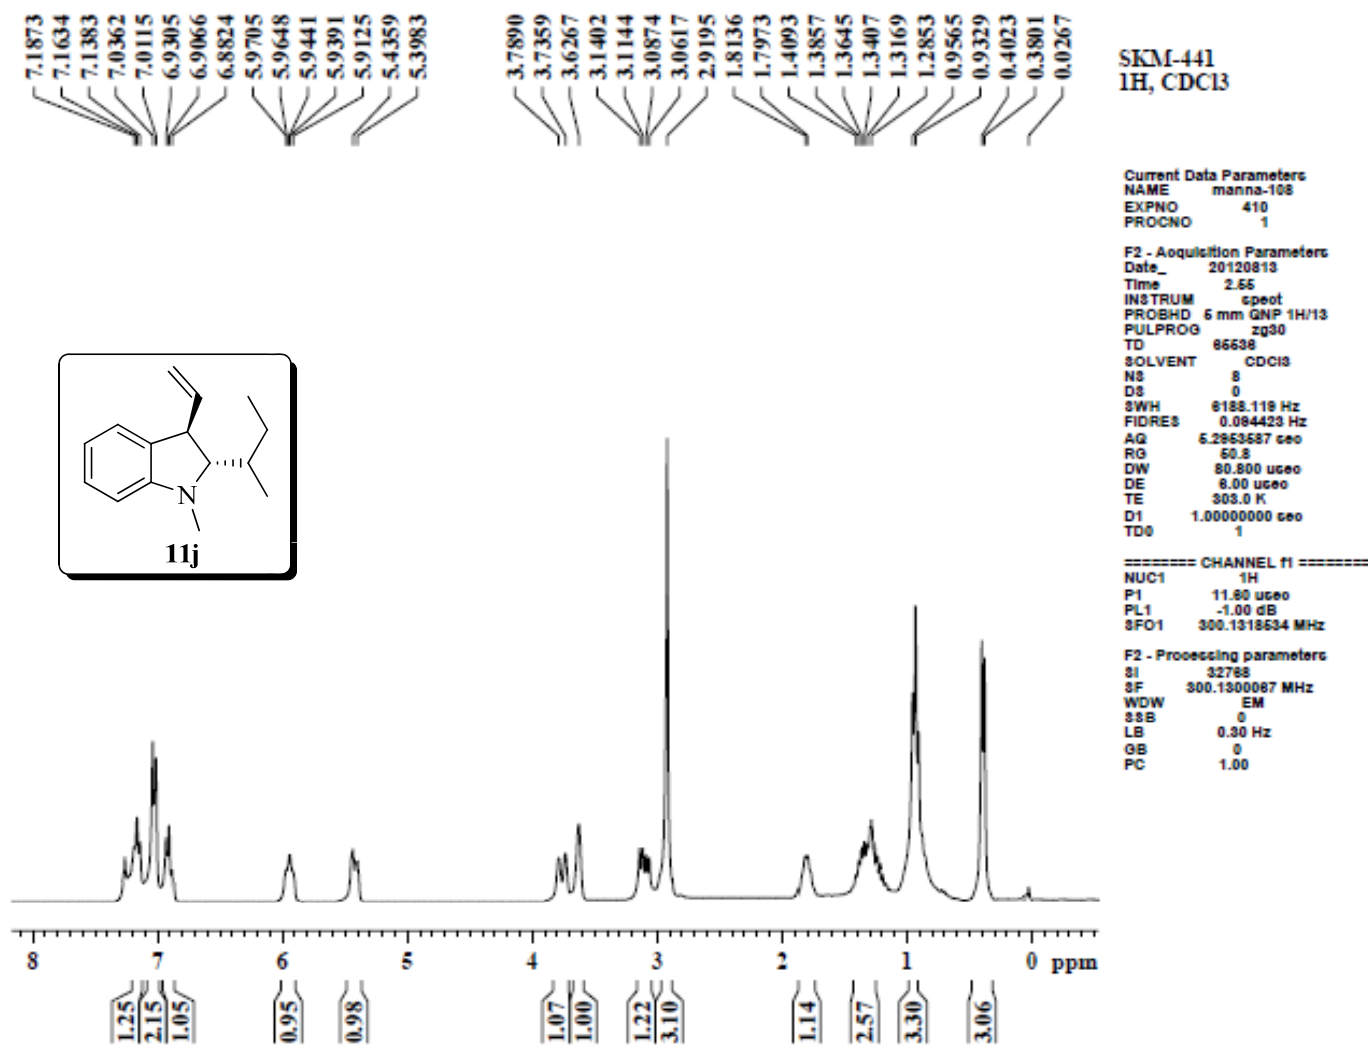

**Figure 124:**  $^1\text{H}$  -NMR Spectrum of **11j**.



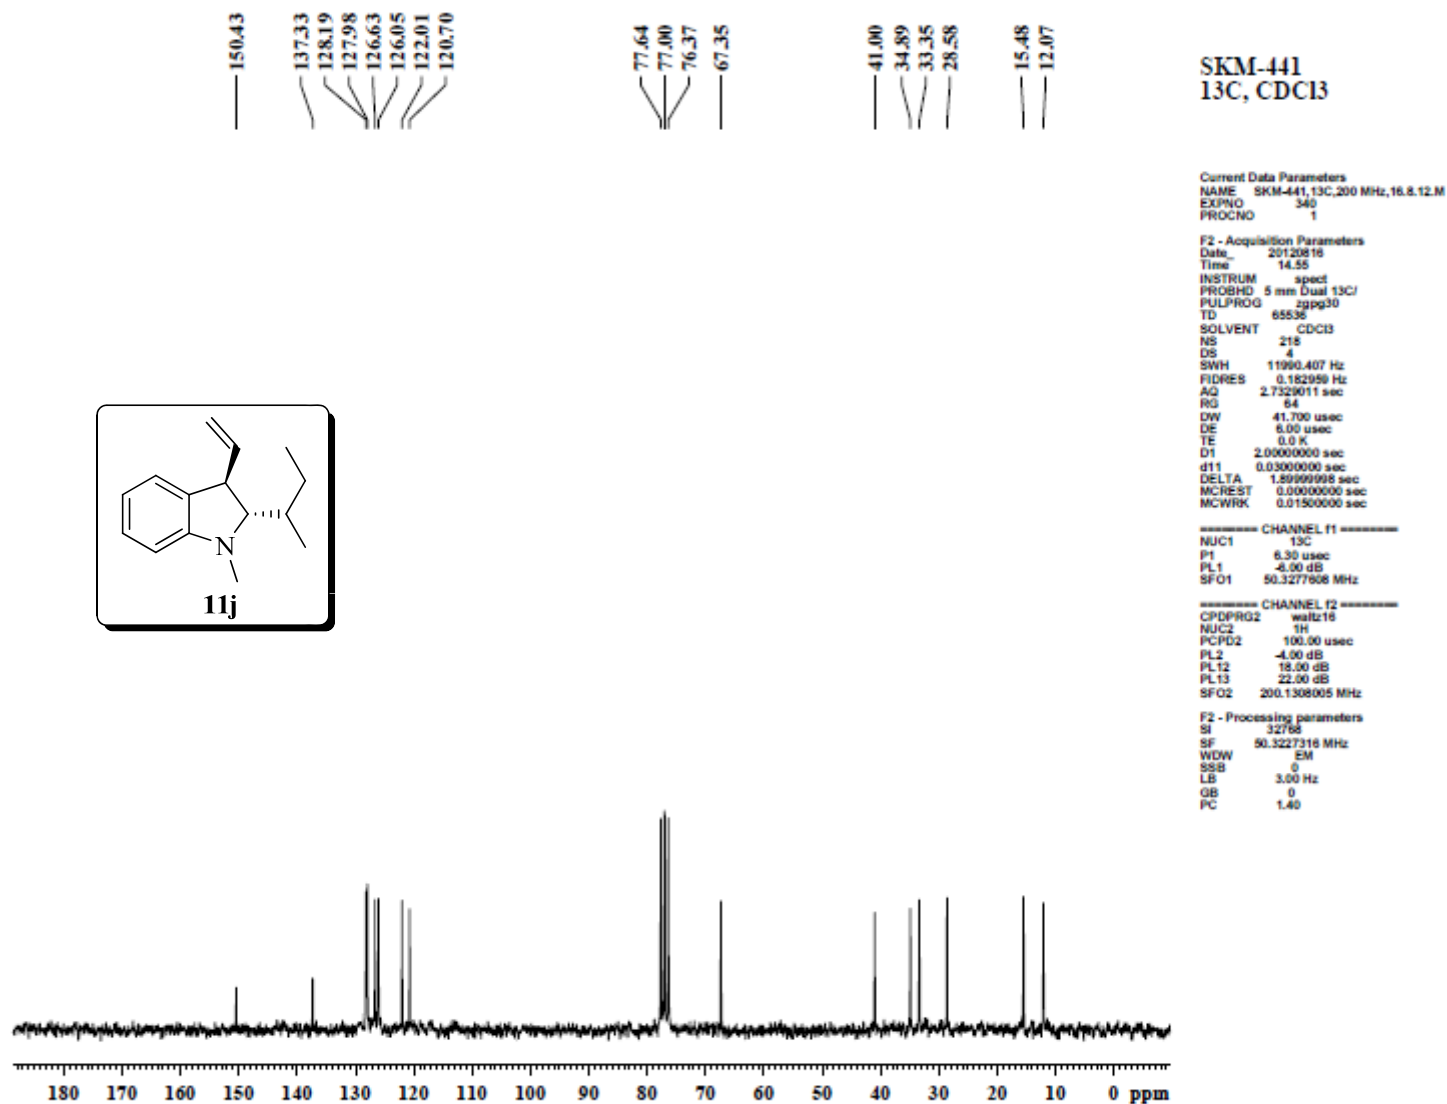

**Figure 125:**  $^{13}\text{C}$  -NMR Spectrum of **11j**.

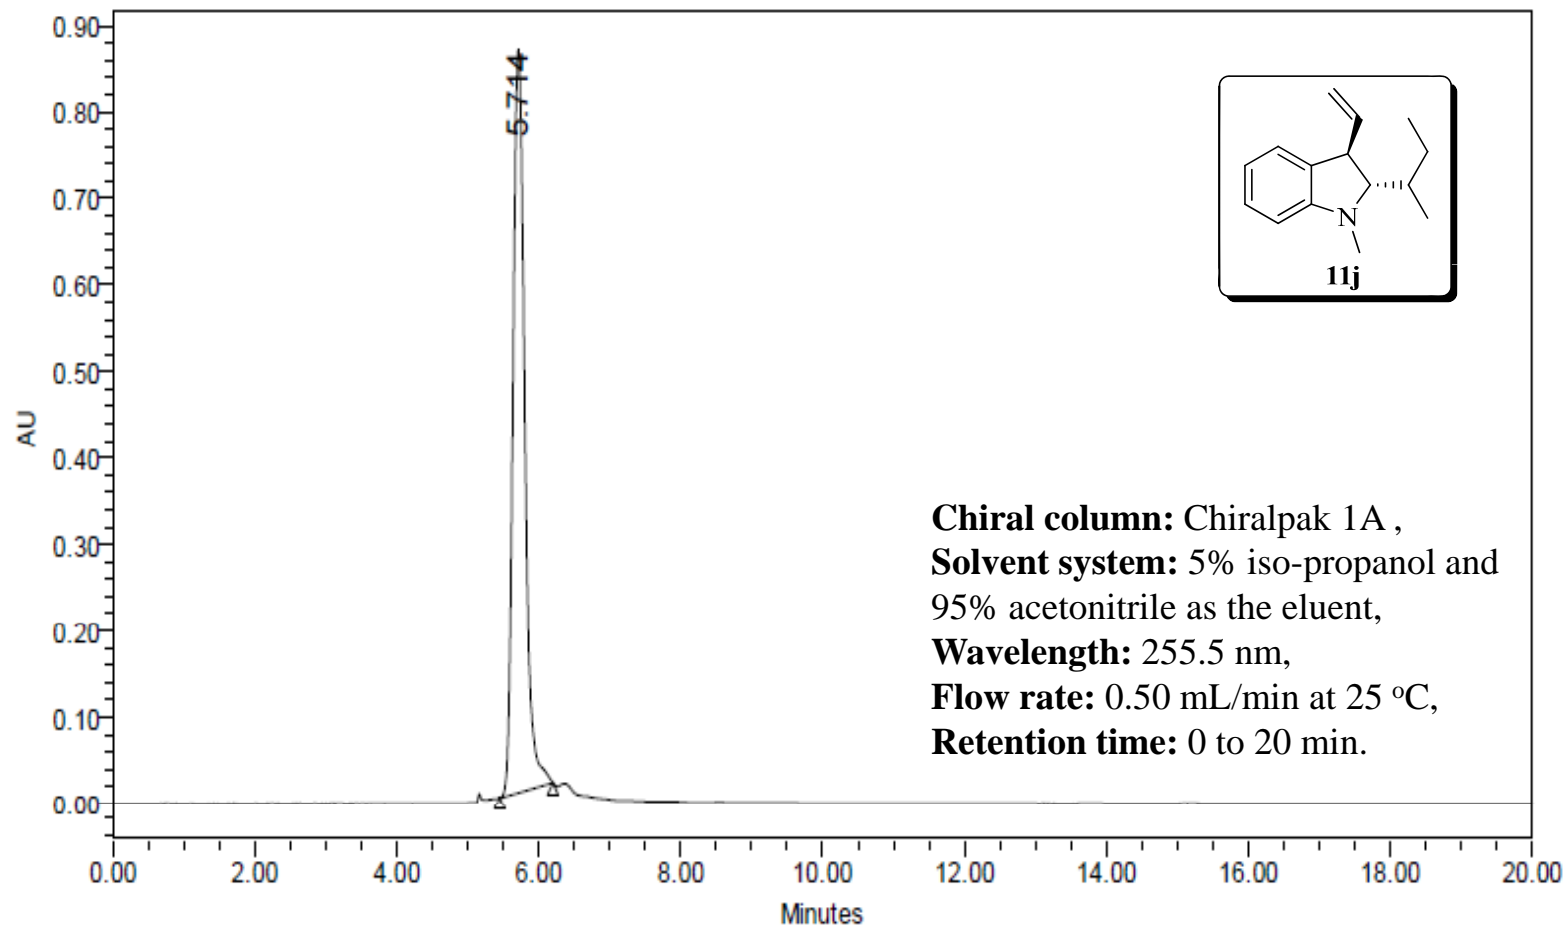

**Figure 126: HPLC -Spectrum of 11j.**

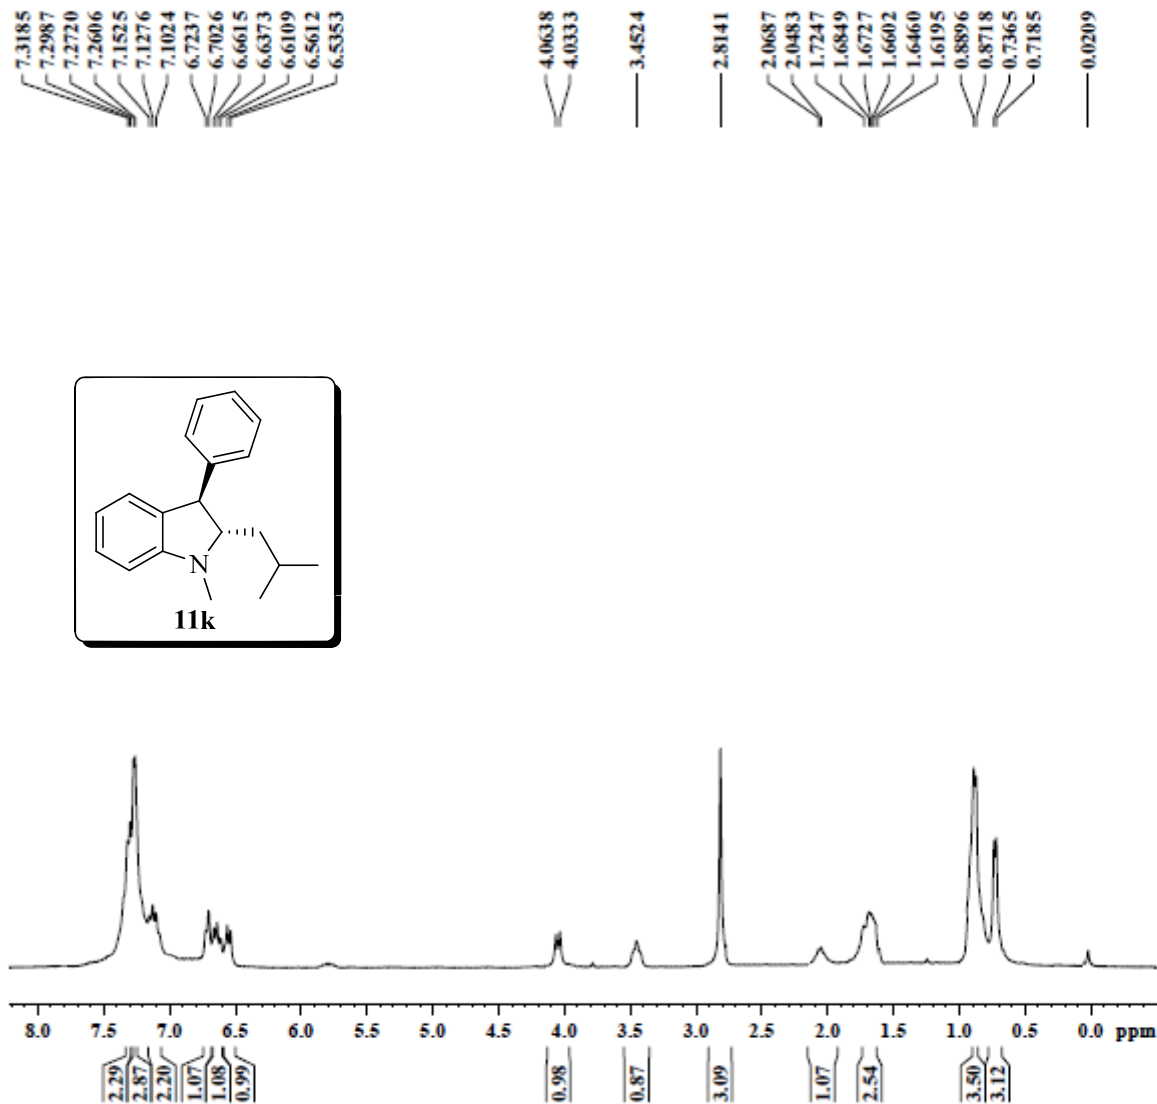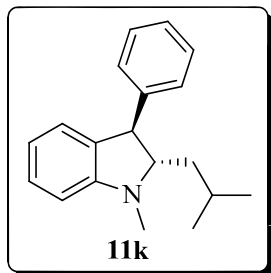

SKM-396  
1H, CDC13

Current Data Parameters  
 NAME SKM-396, 1H, 300 MHz, 23.7, 12.M  
 EXPNO 320  
 PROCNO 1

F2 - Acquisition Parameters  
 Date\_ 20120723  
 Time 16.31  
 INSTRUM spect  
 PROBHD 5 mm QNP 1H/13  
 PULPROG zg30  
 TD 65536  
 SOLVENT CDC13  
 NS 8  
 DS 0  
 SWH 6188.119 Hz  
 FIDRES 0.094423 Hz  
 AQ 5.2953587 sec  
 RG 64  
 DW 80.800 usec  
 DE 6.00 usec  
 TE 295.1 K  
 D1 1.0000000 sec  
 TD0 1

----- CHANNEL f1 -----  
 NUC1 1H  
 P1 11.60 usec  
 PL1 -1.00 dB  
 SFO1 300.1318534 MHz

F2 - Processing parameters  
 SI 32768  
 SF 300.1300060 MHz  
 WDW EM  
 SSB 0  
 LB 0.30 Hz  
 GB 0  
 PC 1.00

Figure 127: <sup>1</sup>H -NMR Spectrum of **11k**.

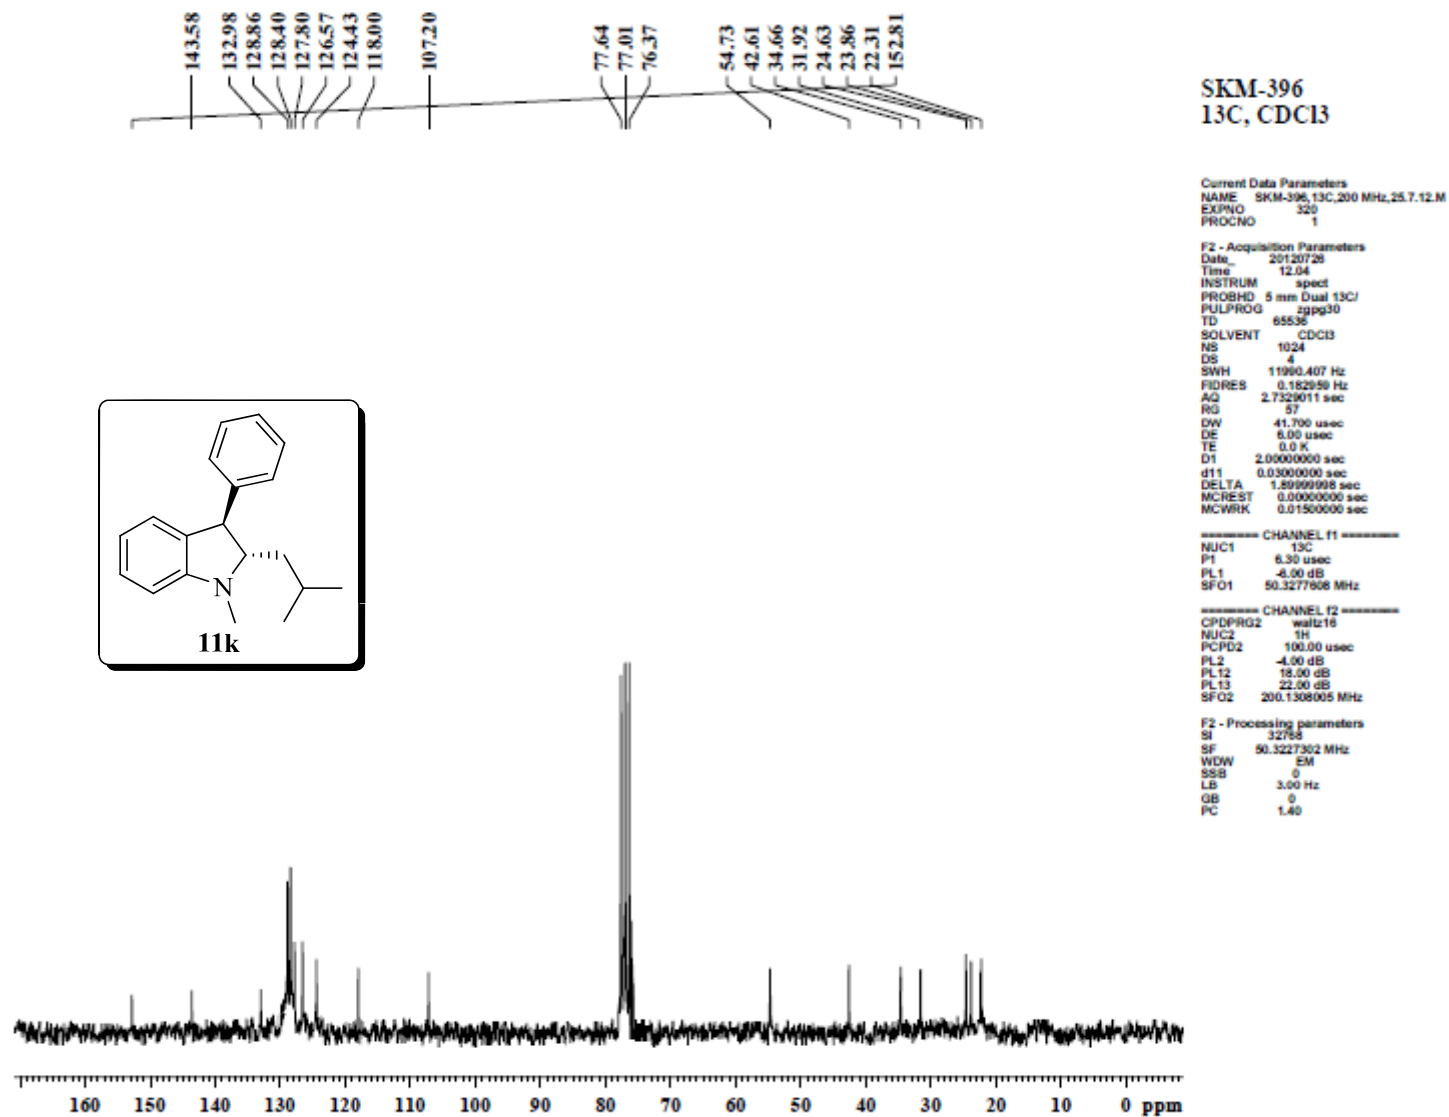

**Figure 128:**  $^{13}\text{C}$  -NMR Spectrum of **11k**.

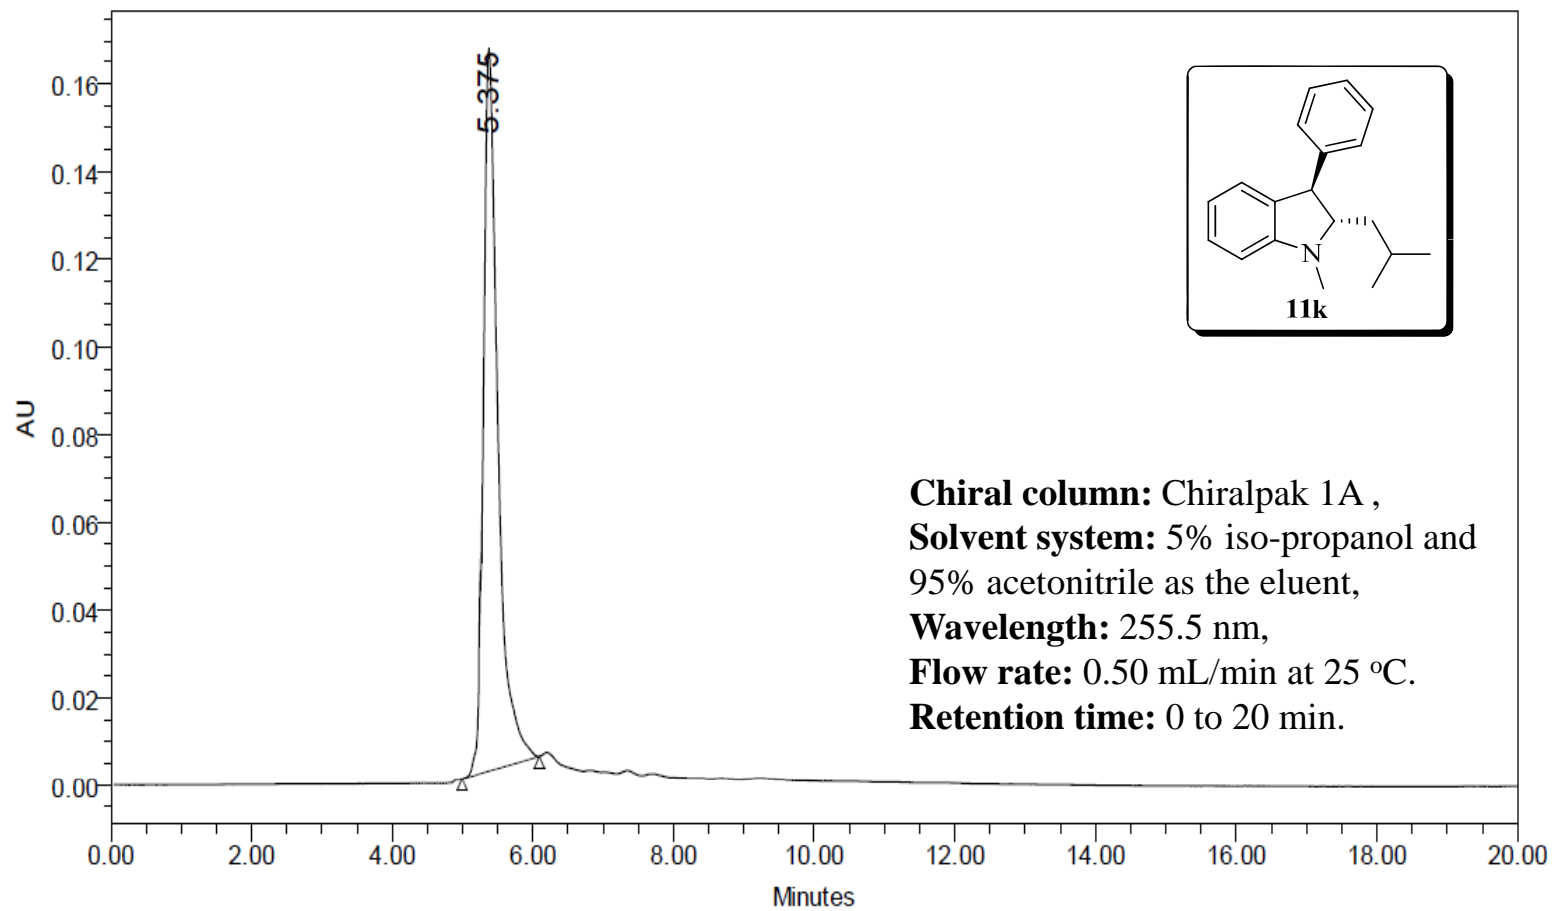

**Figure 129:** HPLC -Spectrum of **11k**.

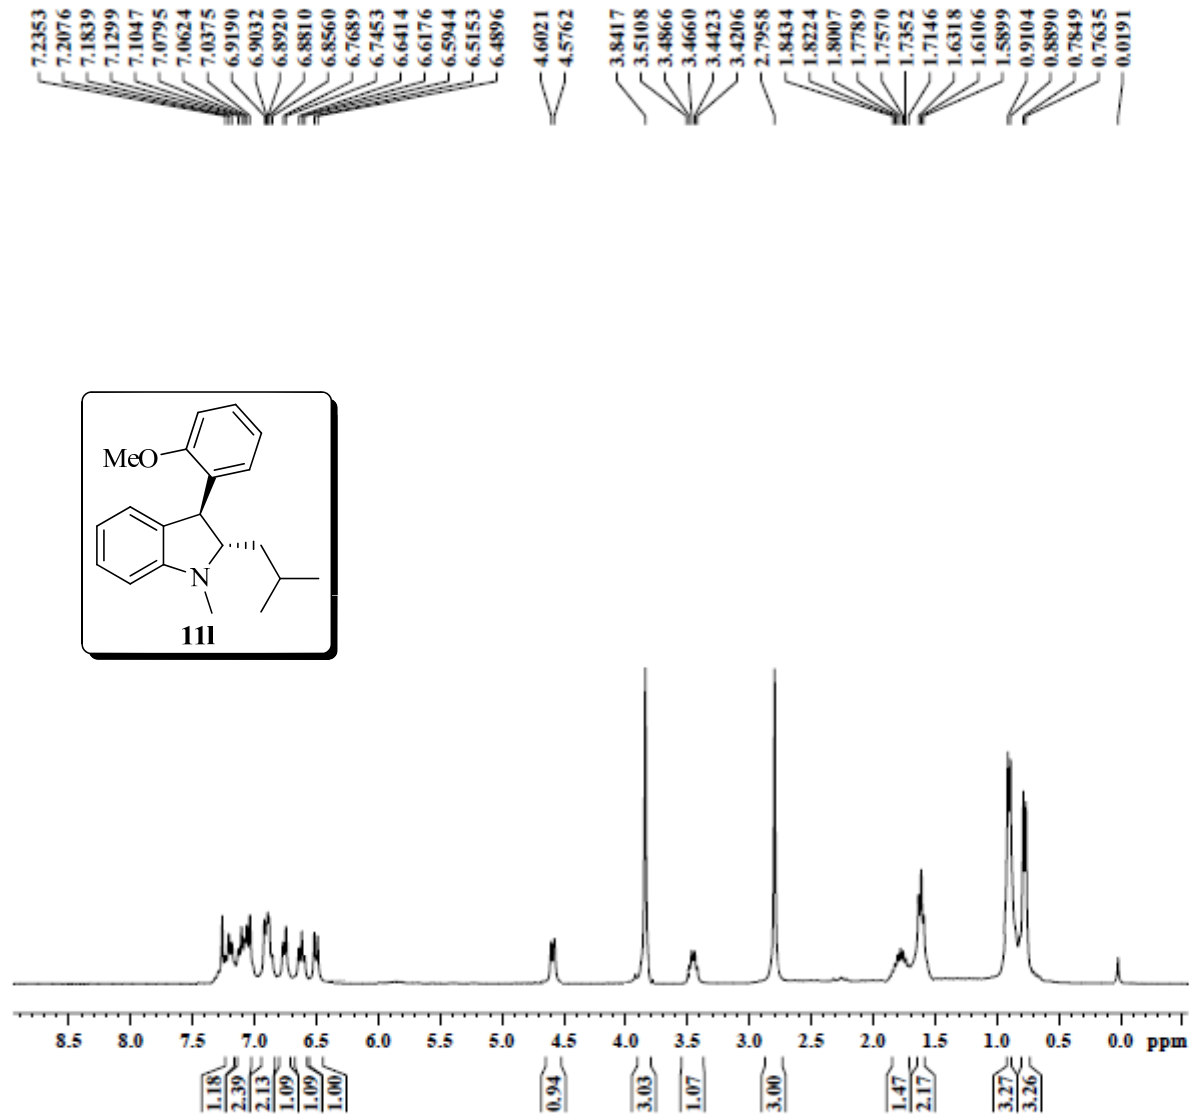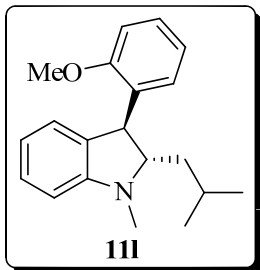

SKM-398  
1H, CDCl3

Current Data Parameters  
NAME SKM-388\_1H\_300 MHz.2.7.12.E  
EXPNO 960  
PROCNO 1

F2 - Acquisition Parameters  
Date\_ 20120703  
Time 2.17  
INSTRUM spect  
PROBHD 5 mm QNP 1H/13  
PULPROG zg30  
TD 66636  
SOLVENT CDCl3  
NS 32  
DS 0  
SWH 6188.118 Hz  
FIDRES 0.094423 Hz  
AQ 6.2963587 sec  
RG 30.8  
DW 80.800 usec  
DE 8.00 usec  
TE 298.8 K  
D1 1.00000000 sec  
TD0 1

===== CHANNEL f1 =====  
NUC1 1H  
P1 11.80 usec  
PL1 -1.00 dB  
SFO1 300.1318634 MHz

F2 - Processing parameters  
SI 32768  
SF 300.1300088 MHz  
WDW EM  
SSB 0  
LB 0.33 Hz  
GB 0  
PC 1.00

Figure 130: <sup>1</sup>H -NMR Spectrum of **11l**.

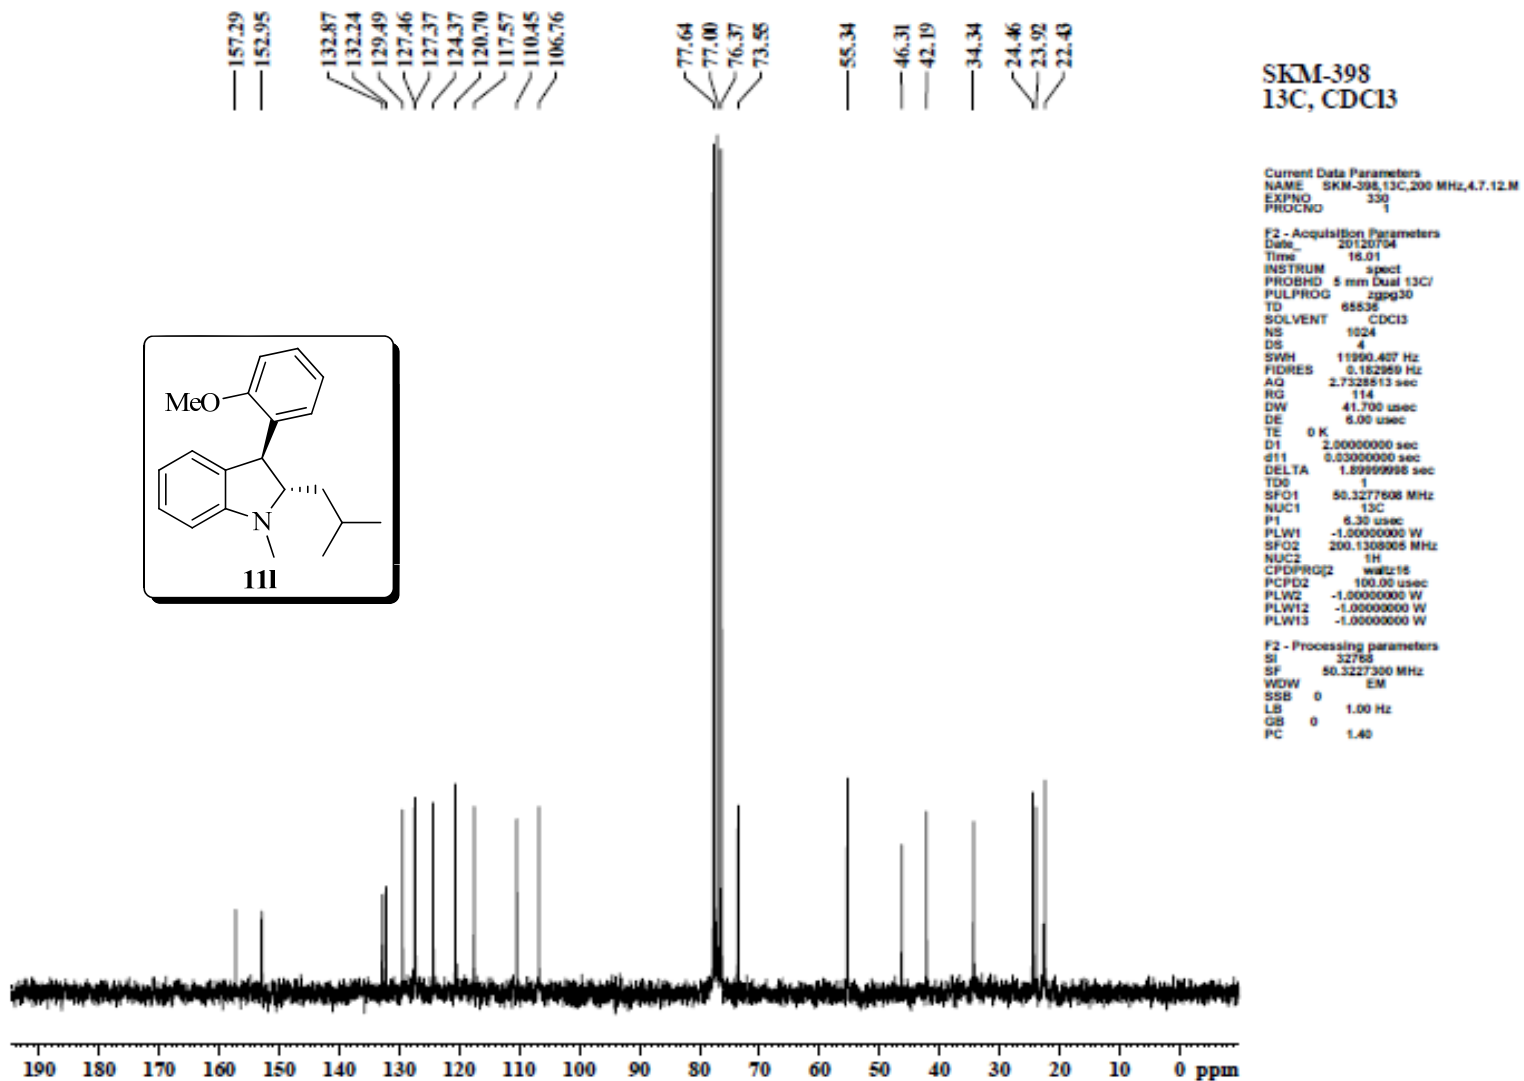

**Figure 131:** <sup>13</sup>C -NMR Spectrum of **11l**.

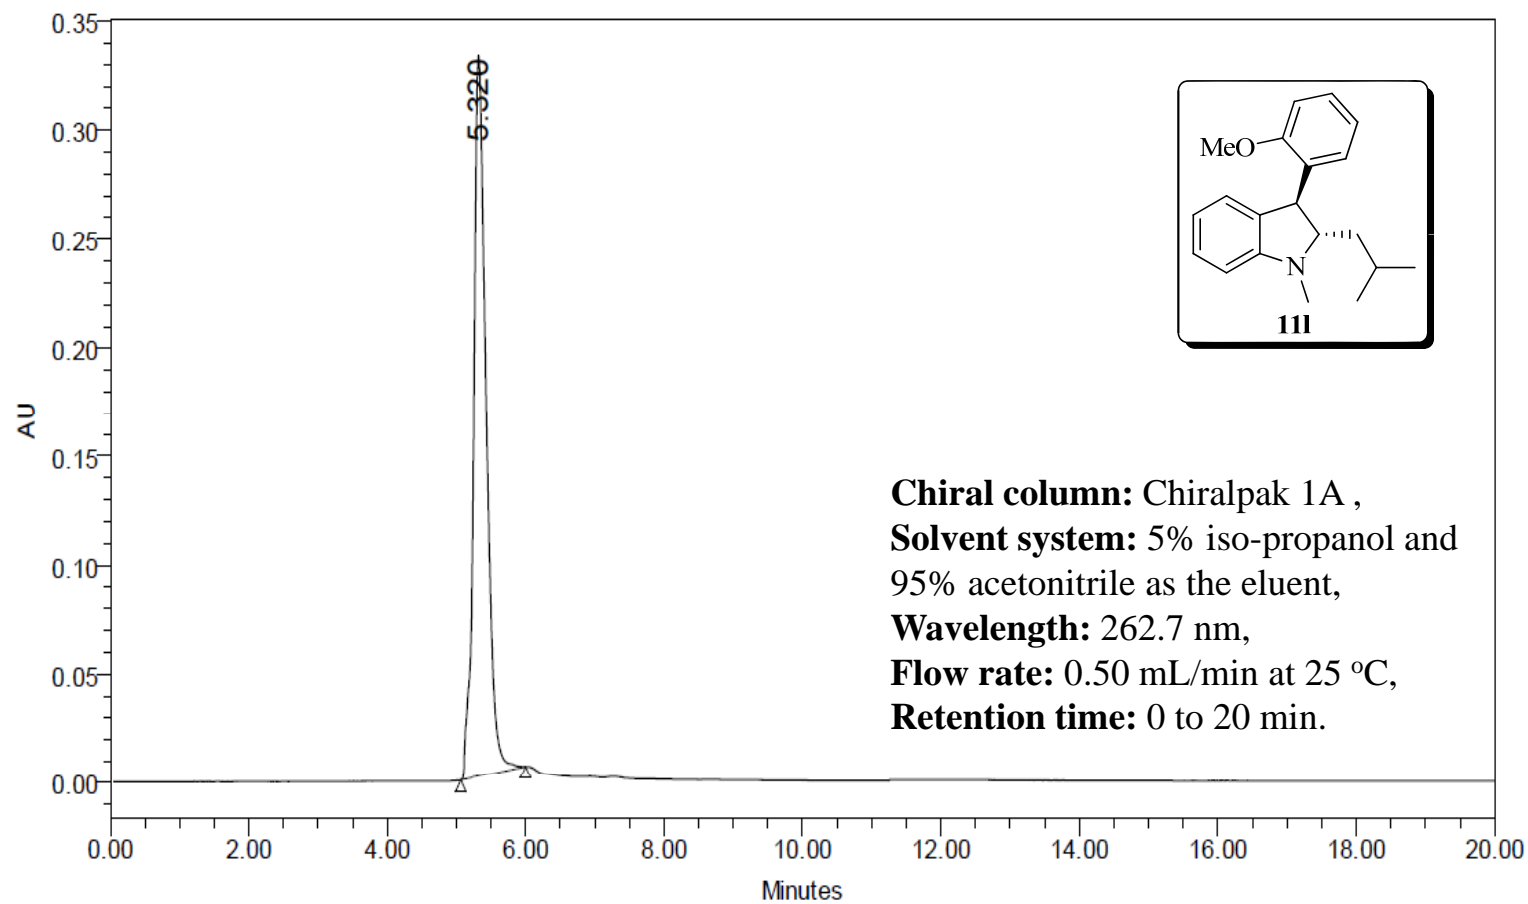

**Figure 132: HPLC -Spectrum of 11l.**



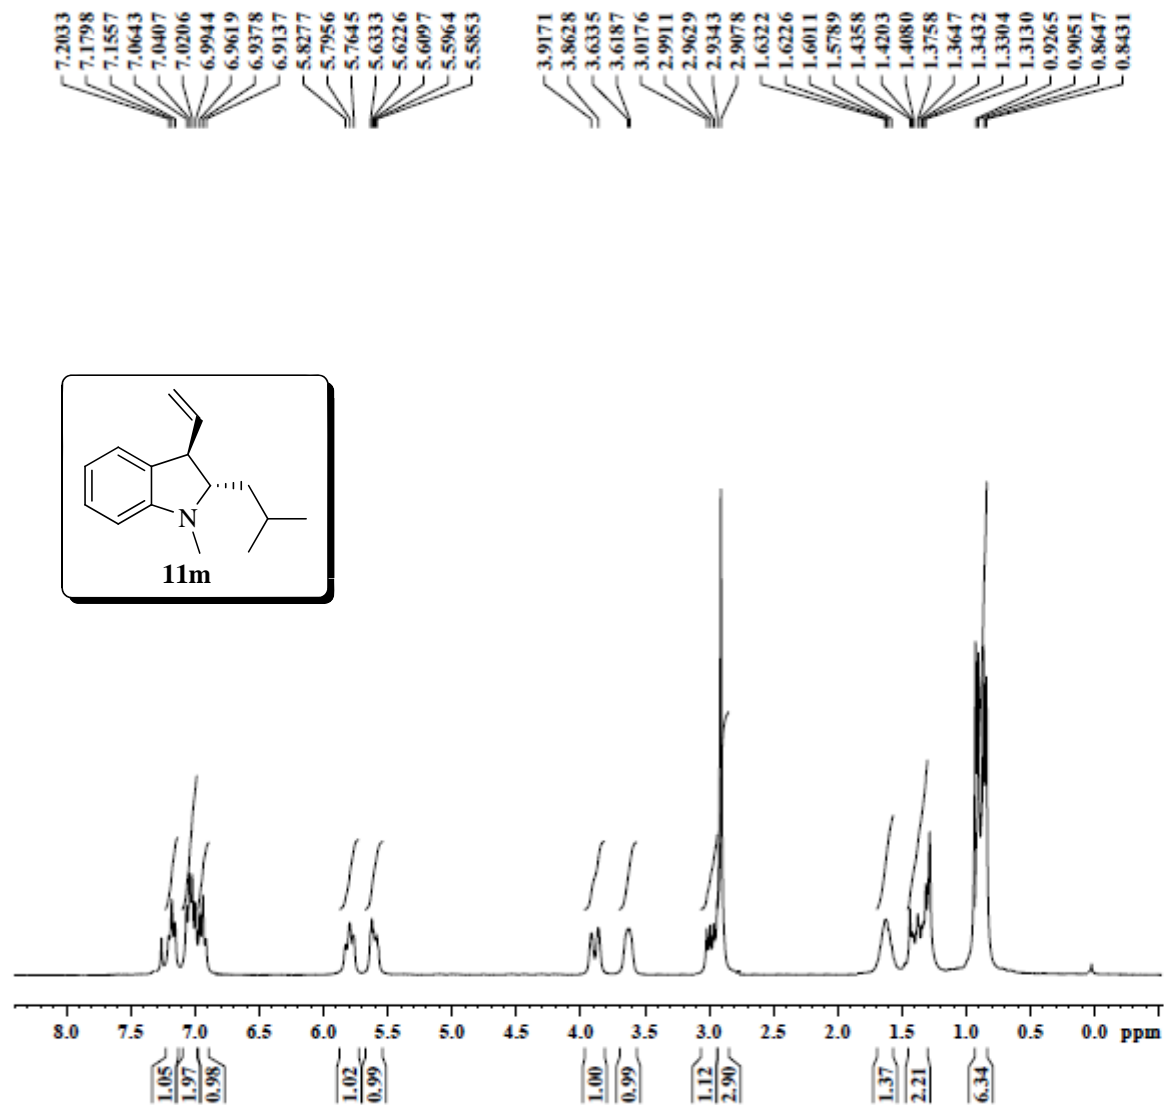

SKM-420  
1H, CDC13

Current Data Parameters  
NAME SKM-420,1H,300 MHz,1.8,12.M  
EXPNO 330  
PROCNO 1

F2 - Acquisition Parameters  
Date\_ 20120801  
Time 15.30  
INSTRUM spect  
PROBHD 5 mm QNP 1H/13  
PULPROG zg30  
TD 65536  
SOLVENT CDC13  
NS 8  
DS 0  
SWH 8188.119 Hz  
FIDRES 0.094423 Hz  
AQ 5.2053587 sec  
RG 64  
DW 80.800 usec  
DE 6.00 usec  
TE 303.0 K  
D1 1.00000000 sec  
TD0 1

CHANNEL f1  
NUC1 1H  
P1 11.80 usec  
PL1 -1.00 dB  
SFO1 300.1318534 MHz

F2 - Processing parameters  
SI 32768  
SF 300.1300096 MHz  
WDW EM  
SSB 0  
LB 0.30 Hz  
GB 0  
PC 1.00

Figure 133: <sup>1</sup>H -NMR Spectrum of **11m**.

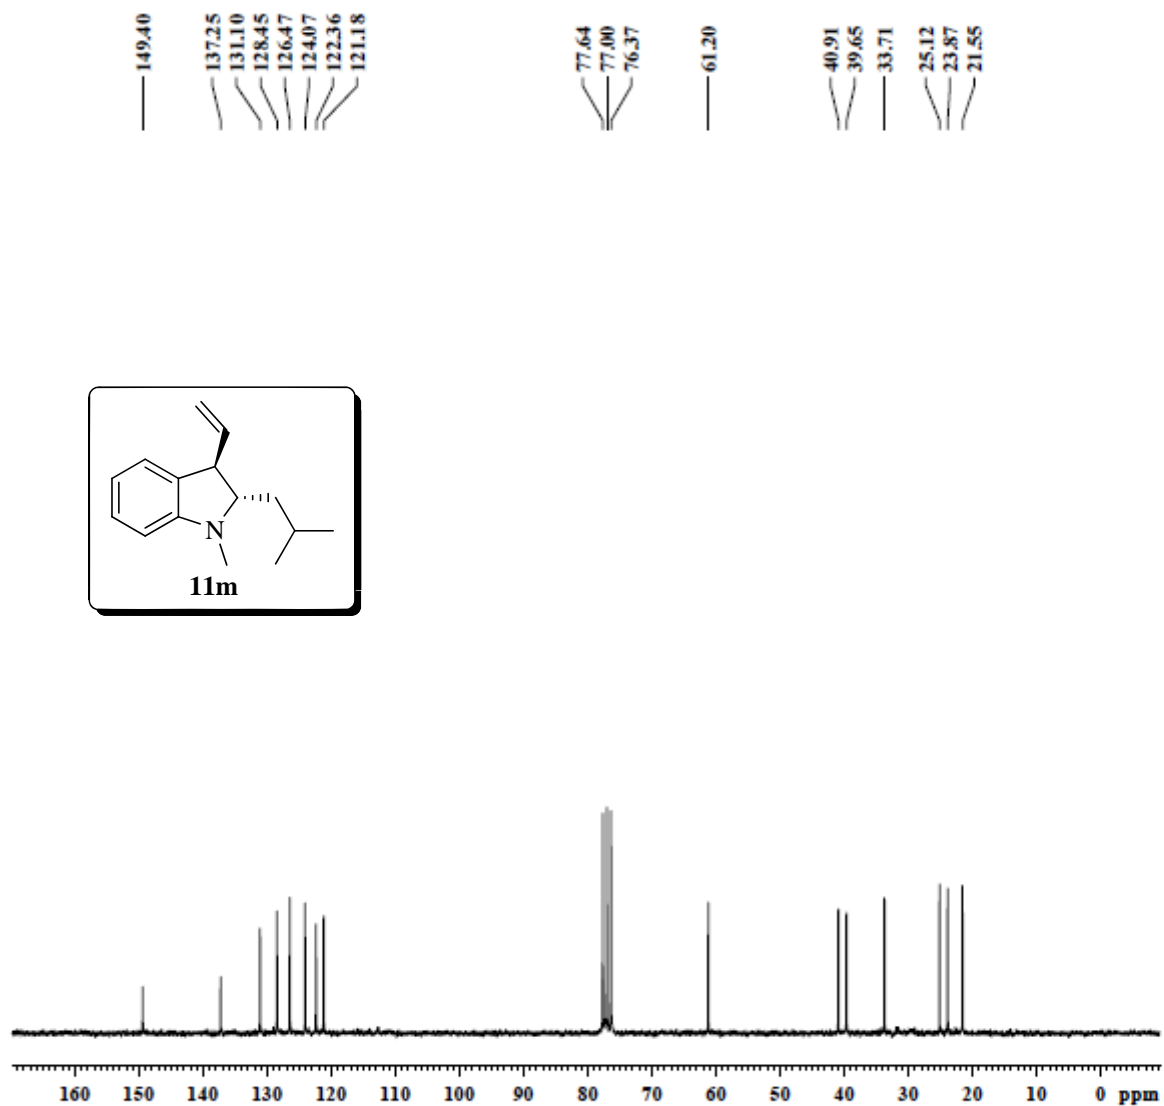

SKM-420  
13C,CDC13

Current Data Parameters  
NAME SKM-420, 13C, 200 MHz, 8.8, 12. M  
EXPNO 320  
PROCNO 1

F2 - Acquisition Parameters  
Date\_ 20120808  
Time 16.06  
INSTRUM spect  
PROBHD 5 mm Dual 13C/  
PULPROG zgpg30  
TD 65536  
SOLVENT CDC13  
NS 1024  
DS 4  
SWH 11980.407 Hz  
FIDRES 0.182659 Hz  
AQ 2.7329011 sec  
RG 57  
DW 41.700 usec  
DE 6.00 usec  
TE 0.0 K  
D1 2.0000000 sec  
d11 0.0300000 sec  
DELTA 1.2000000 sec  
MCREST 0.0000000 sec  
MCWRK 0.0150000 sec

----- CHANNEL f1 -----  
NUC1 13C  
P1 6.30 usec  
PL1 -8.00 dB  
SFO1 50.3277808 MHz

----- CHANNEL f2 -----  
CPDPRG2 waltz16  
NUC2 1H  
PCPD2 100.00 usec  
PL2 -4.00 dB  
PL12 18.00 dB  
PL13 22.00 dB  
SFO2 200.1308005 MHz

F2 - Processing parameters  
SI 32768  
SF 50.3227313 MHz  
WDW EM  
SSB 0  
LB 1.00 Hz  
GB 0  
PC 1.40

Figure 134:  $^{13}\text{C}$  -NMR Spectrum of **11m**.

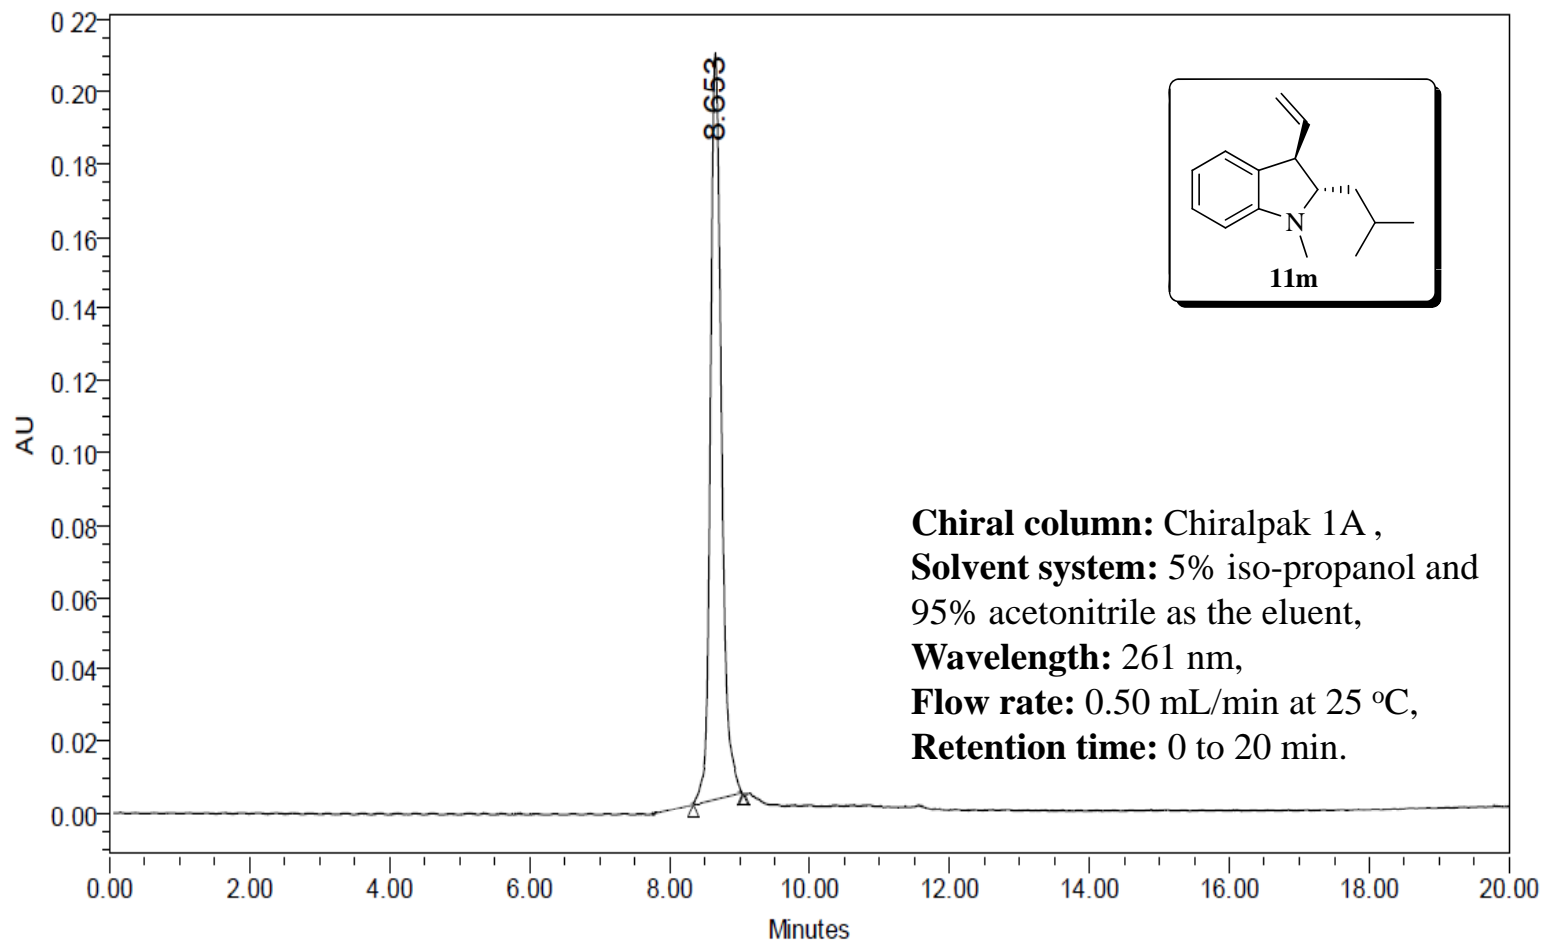

**Figure 135: HPLC -Spectrum of 11m.**

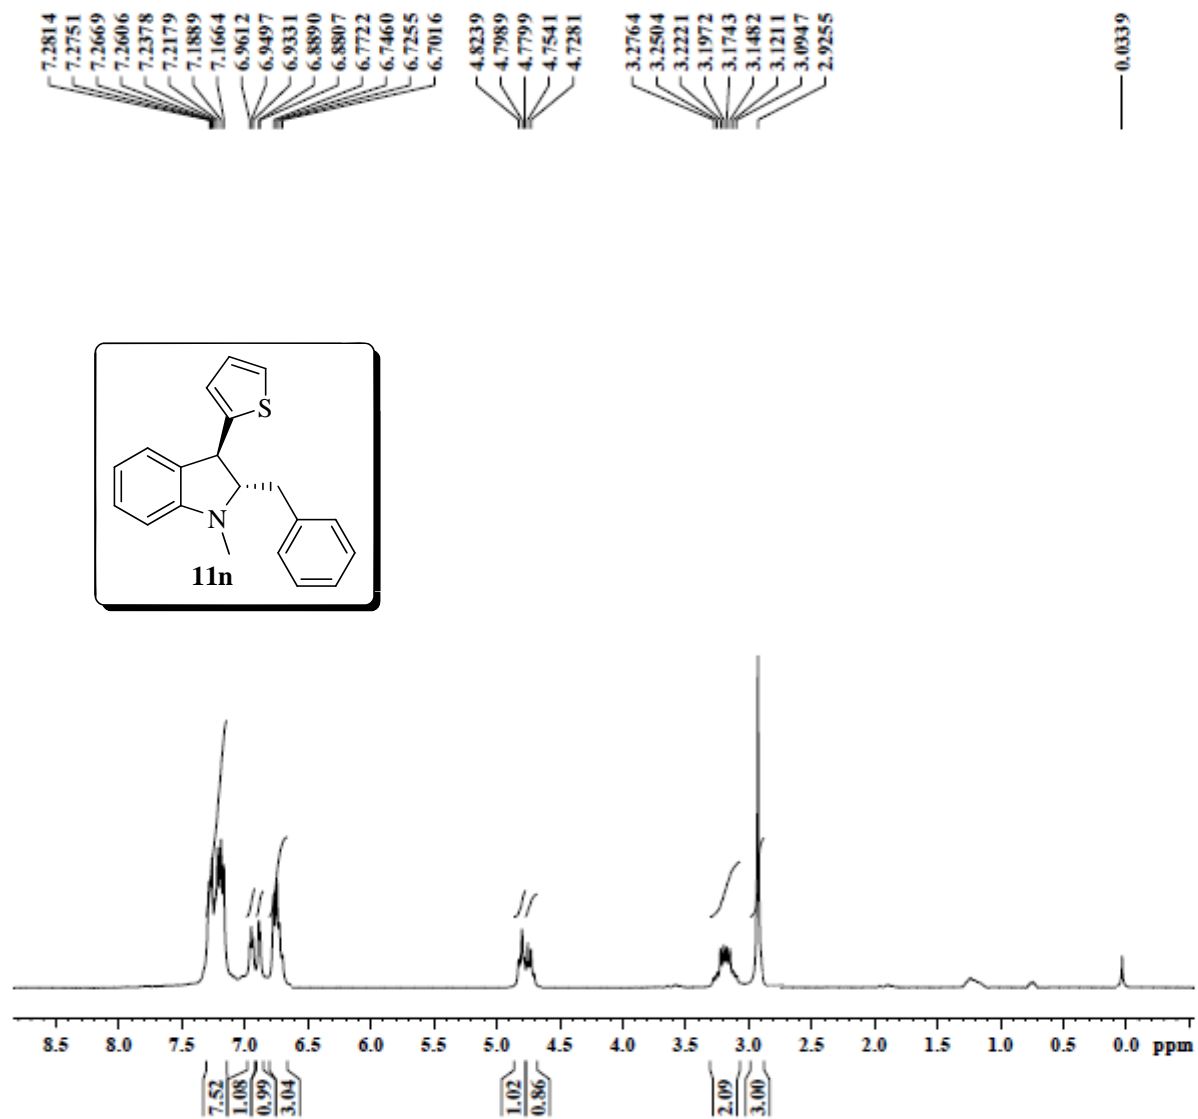

SKM-341  
1H, CDC13

Current Data Parameters  
NAME SKM-341,1H,300 MHz, 29.3.12.E  
EXPNO 300  
PROCNO 1

F2 - Acquisition Parameters  
Date\_ 20120329  
Time 21.47  
INSTRUM spect  
PROBHD 5 mm QNP 1H13  
PULPROG zg30  
TD 65536  
SOLVENT CDC13  
NS 8  
DS 0  
SWH 6185.119 Hz  
FIDRES 0.094423 Hz  
AQ 5.2953987 sec  
RG 64  
DW 80.800 usec  
DE 8.00 usec  
TE 300.2 K  
D1 1.0000000 sec  
TDO 1

===== CHANNEL f1 =====  
NUC1 1H  
P1 11.80 usec  
PL1 -1.00 dB  
SFO1 300.1318534 MHz

F2 - Processing parameters  
SI 32768  
SF 300.1300065 MHz  
WDW EM  
SSB 0  
LB 0.30 Hz  
GB 0  
PC 1.00

Figure 136: <sup>1</sup>H -NMR Spectrum of **11n**.

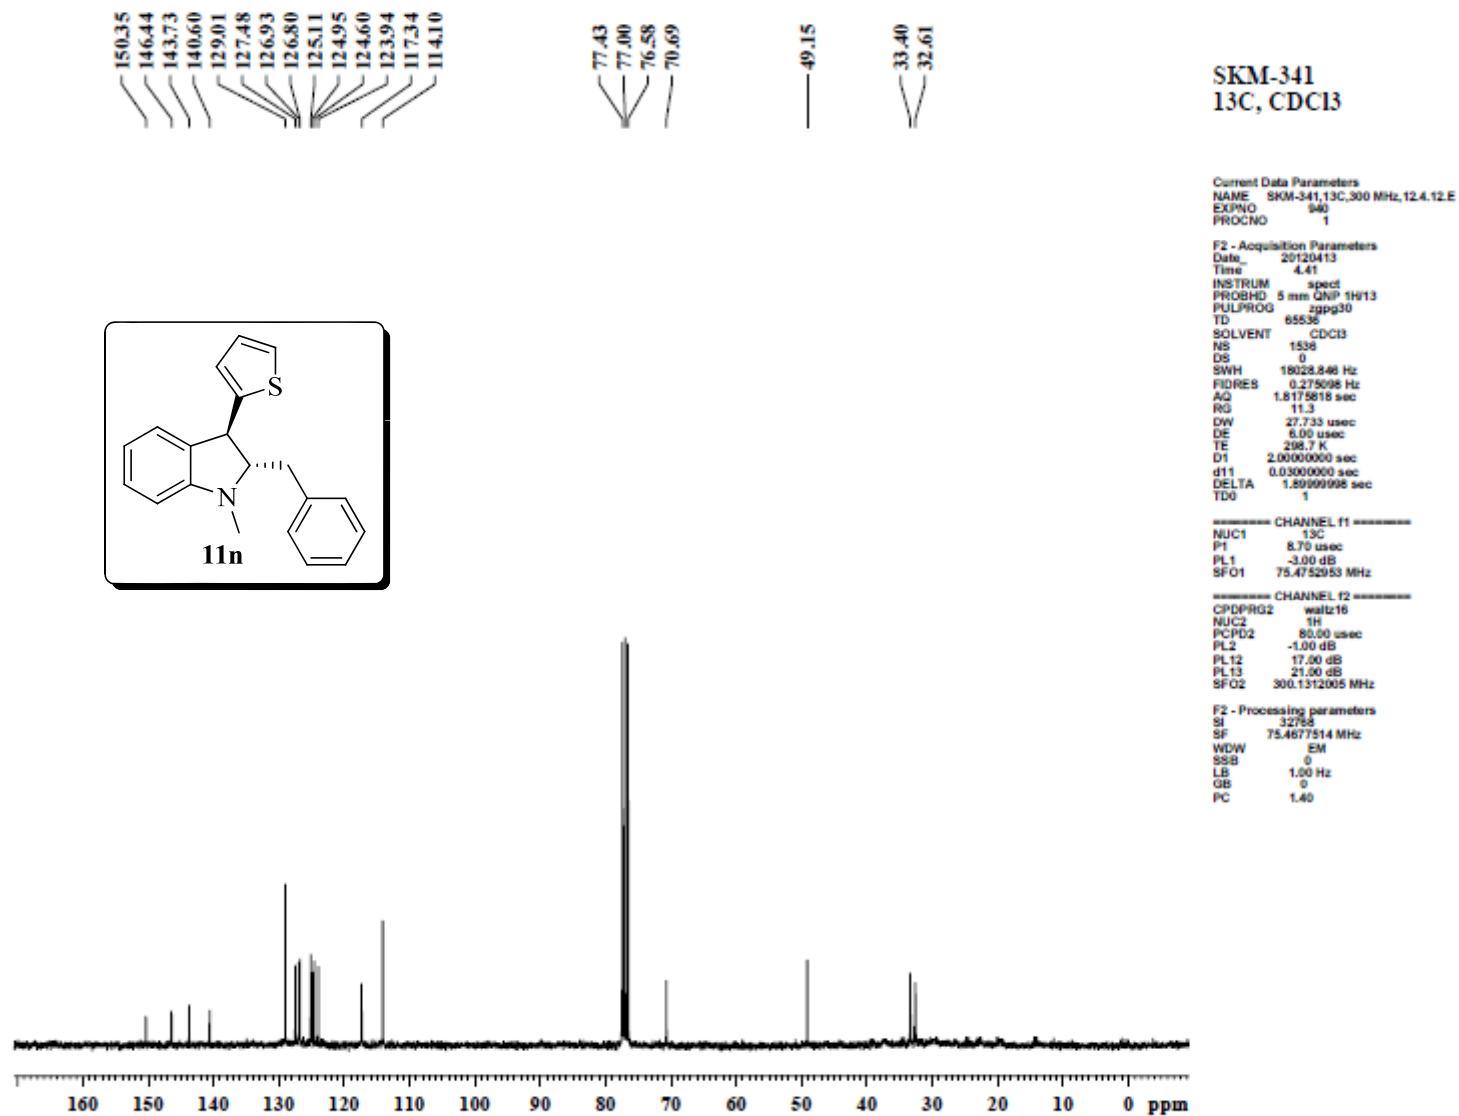

**Figure 137:  $^{13}\text{C}$  -NMR Spectrum of **11n**.**

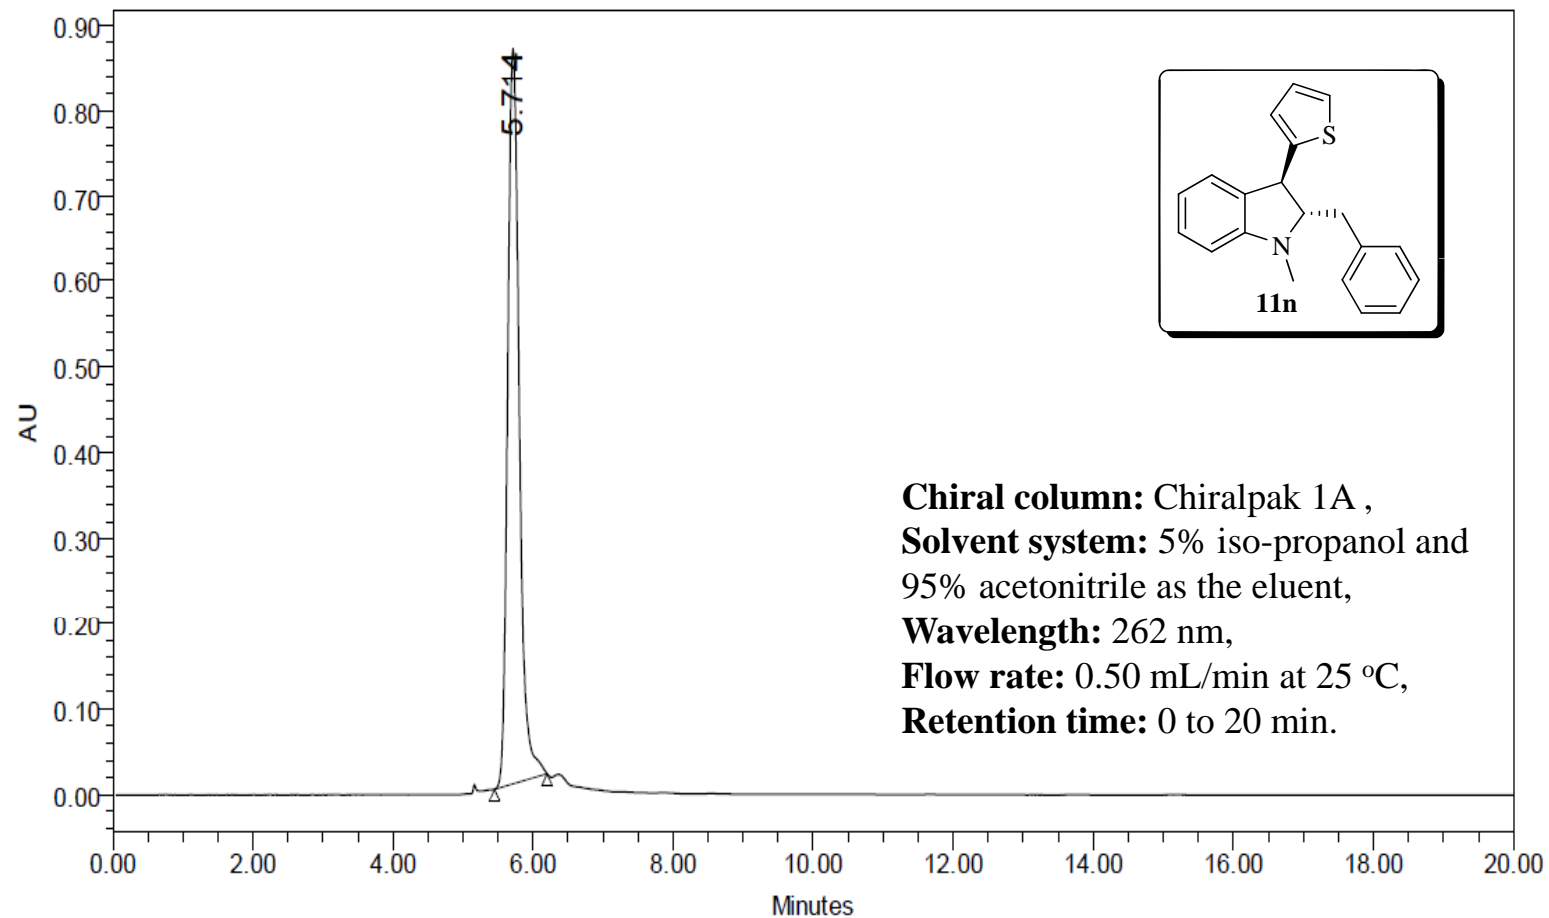

**Figure 138:** HPLC -Spectrum of **11n**.

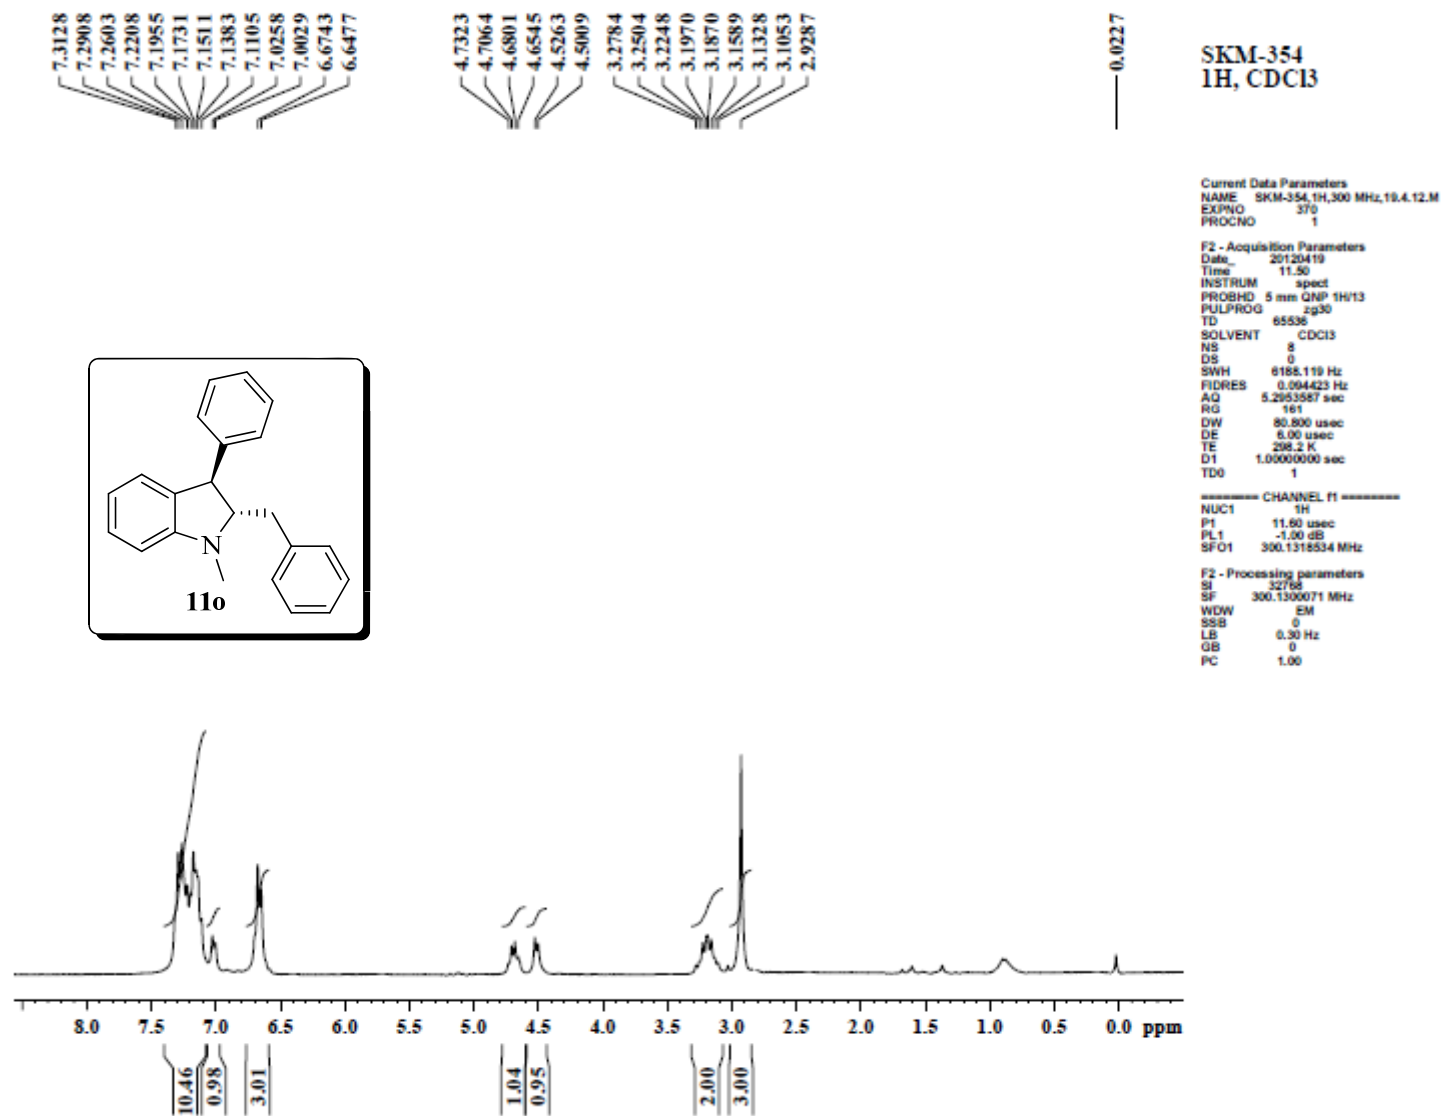

**Figure 139:**  $^1\text{H}$ -NMR Spectrum of **11o**.

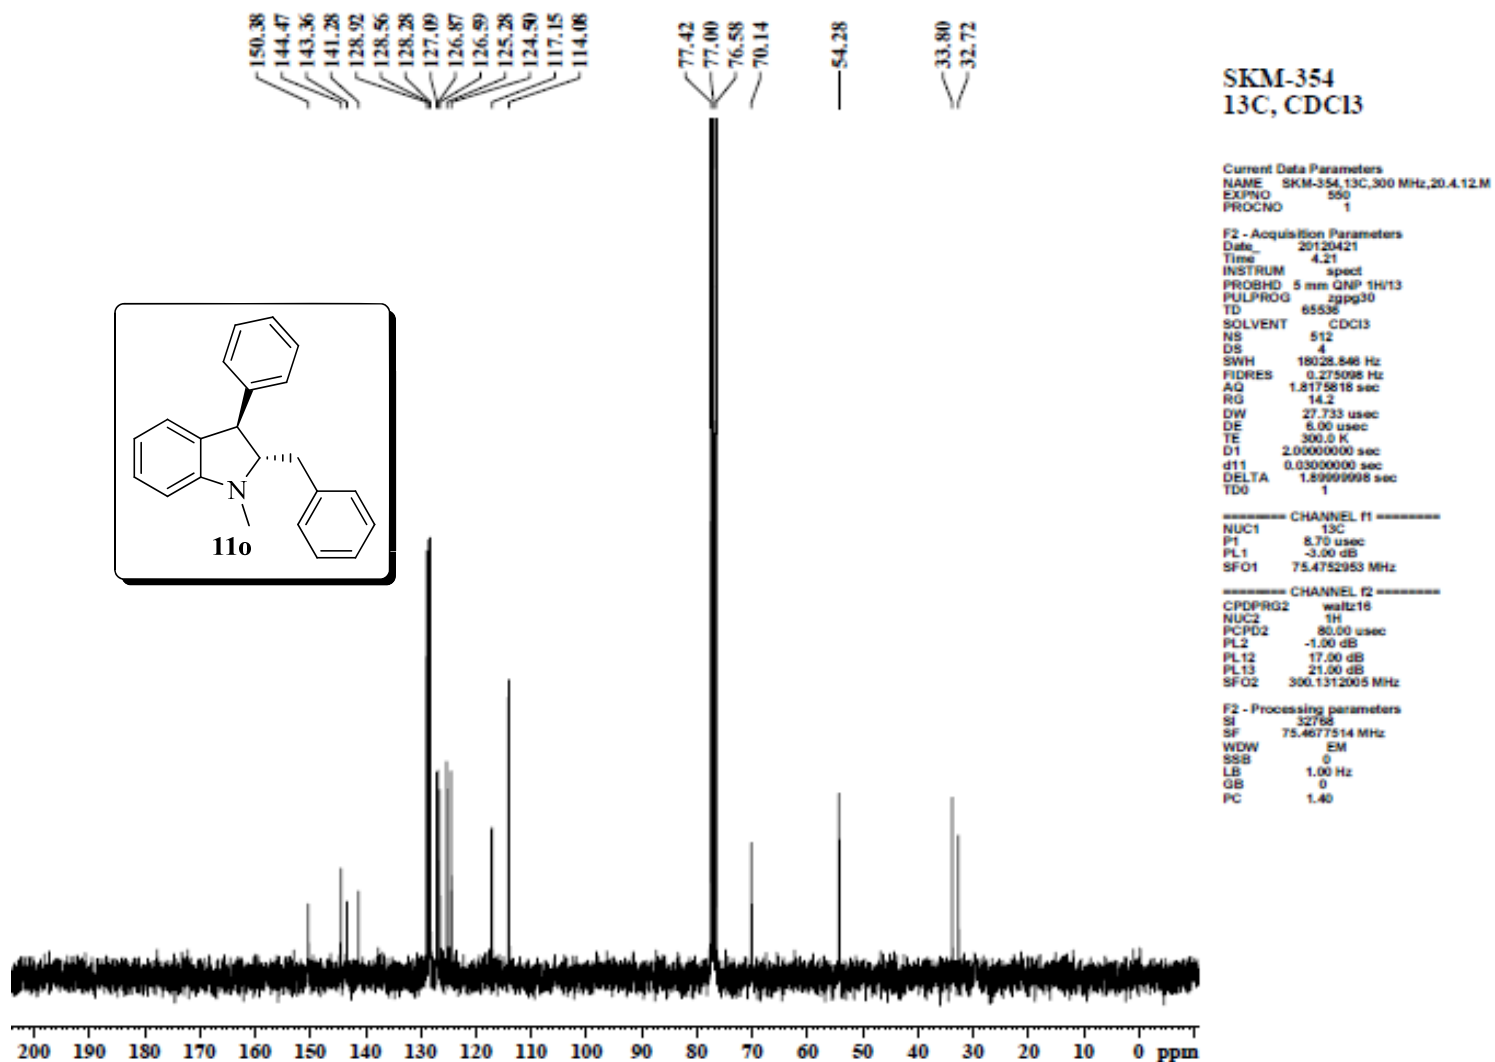

**Figure 140:** <sup>13</sup>C -NMR Spectrum of **11o**.



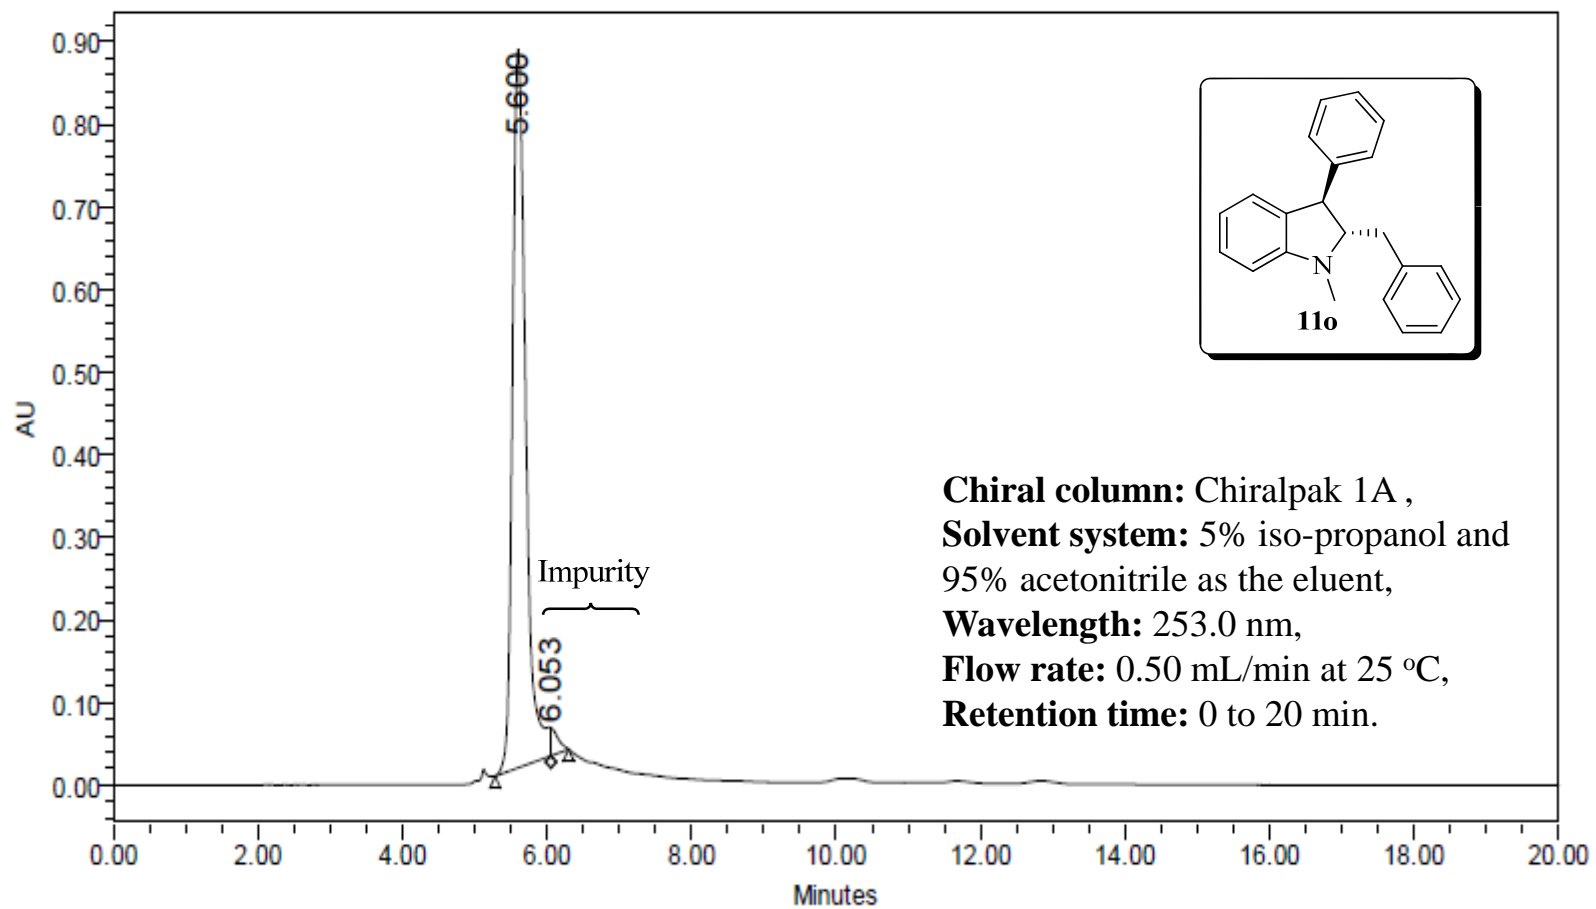

**Note:** The impurity species were collected and found by  $^1\text{H}$  NMR not to contain any isomeric forms of compound **11o**.

**Figure 141:** HPLC -Spectrum of **11o**.

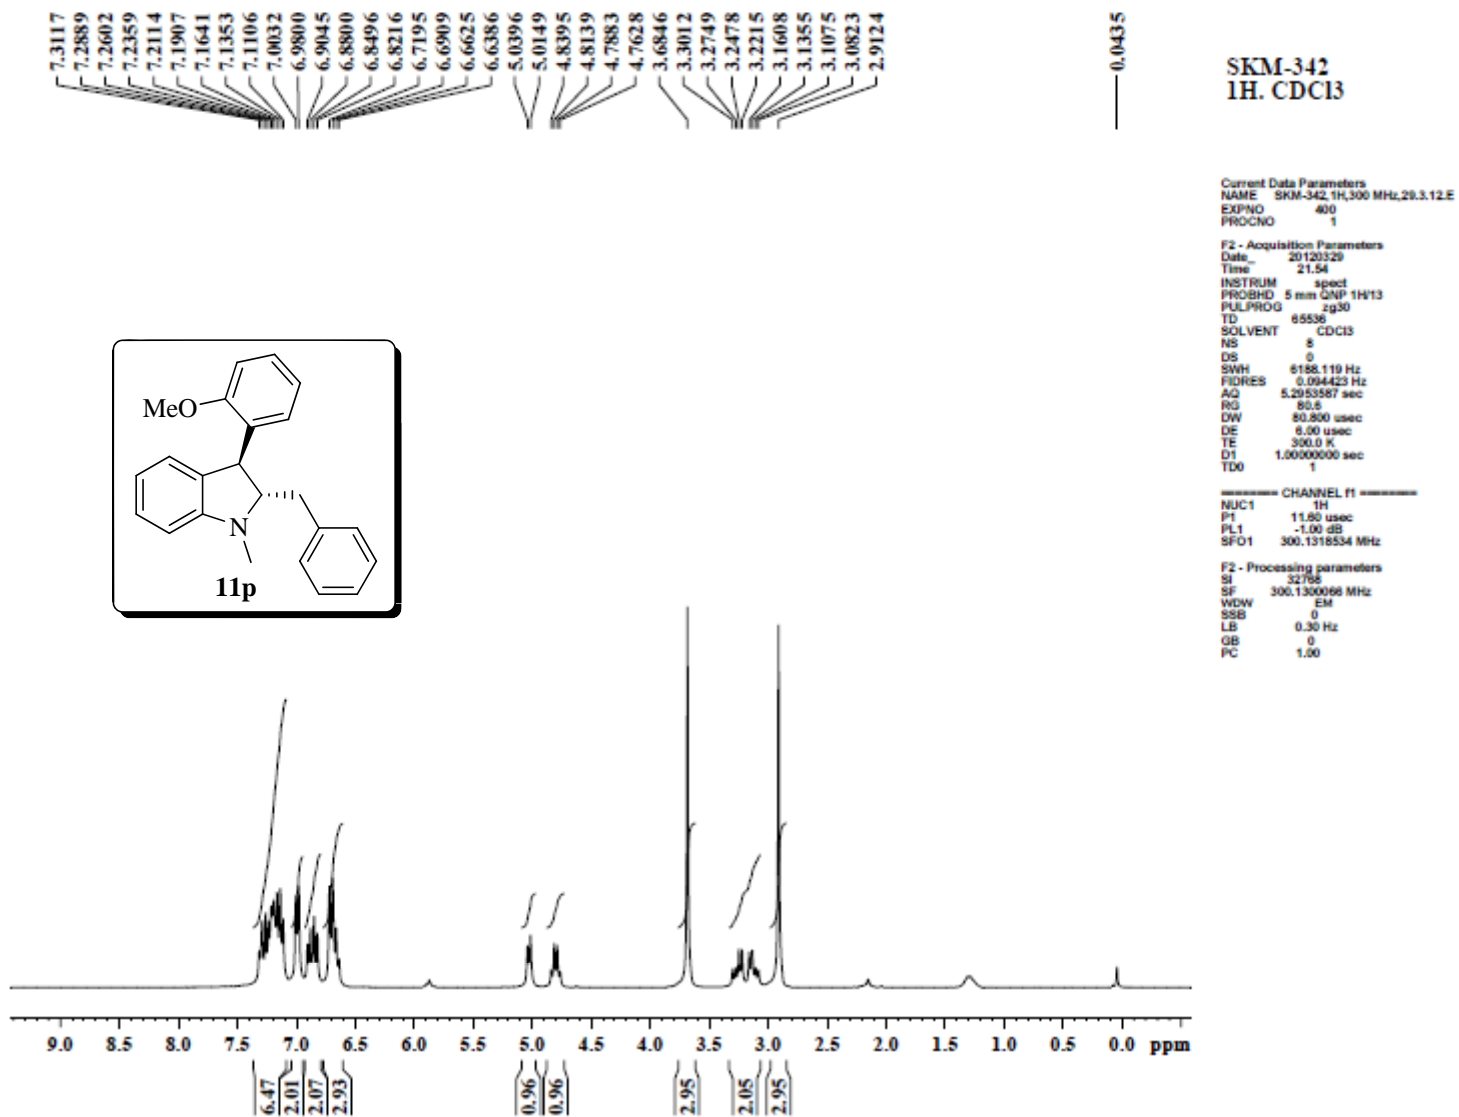

Figure 142: <sup>1</sup>H -NMR Spectrum of **11p**.

157.7735  
150.6186  
144.8810  
141.5153  
131.8419  
128.7634  
128.5062  
127.5396  
126.6678  
124.9343  
124.3007  
120.7005  
116.6845  
113.8823  
110.6073

77.6402  
77.0051  
76.3704  
68.7602  
55.3335  
47.0137  
34.3353  
32.2911

SKM-342  
13C, CDC13

Current Data Parameters  
NAME SKM-342.13C.200 MHz.2.4.12.M  
EXPNO 330  
PROCNO 1

F2 - Acquisition Parameters  
Date\_ 20121001  
Time 12.45  
INSTRUM spect  
PROBHD 5 mm Dual 13C/  
PULPROG zgpg30  
TD 65536  
SOLVENT CDC13  
NS 350  
DS 4  
SWH 11990.407 Hz  
FIDRES 0.182959 Hz  
AQ 2.7329011 sec  
RG 57  
DW 41.700 usec  
DE 6.00 usec  
TE 0.0 K  
D1 2.0000000 sec  
d11 0.03000000 sec  
DELTA 1.89999998 sec  
MCREST 0.00000000 sec  
MCWRRK 0.01500000 sec

----- CHANNEL f1 -----  
NUC1 13C  
P1 6.30 usec  
PL1 -4.00 dB  
SFO1 50.3277658 MHz

----- CHANNEL f2 -----  
CPDPRG2 waltz16  
NUC2 1H  
PCPD2 100.00 usec  
PL2 -4.00 dB  
PL12 18.00 dB  
PL13 22.00 dB  
SFO2 200.1308005 MHz

F2 - Processing parameters  
SI 32768  
SF 50.3227313 MHz  
WDW EM  
SSB 0  
LB 1.00 Hz  
GB 0  
PC 1.40

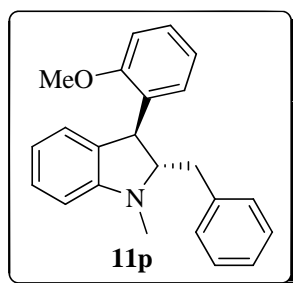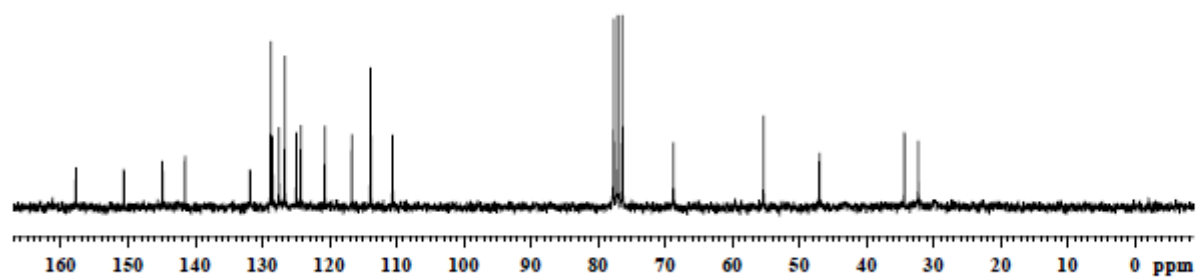

Figure 143:  $^{13}\text{C}$  -NMR Spectrum of **11p**.

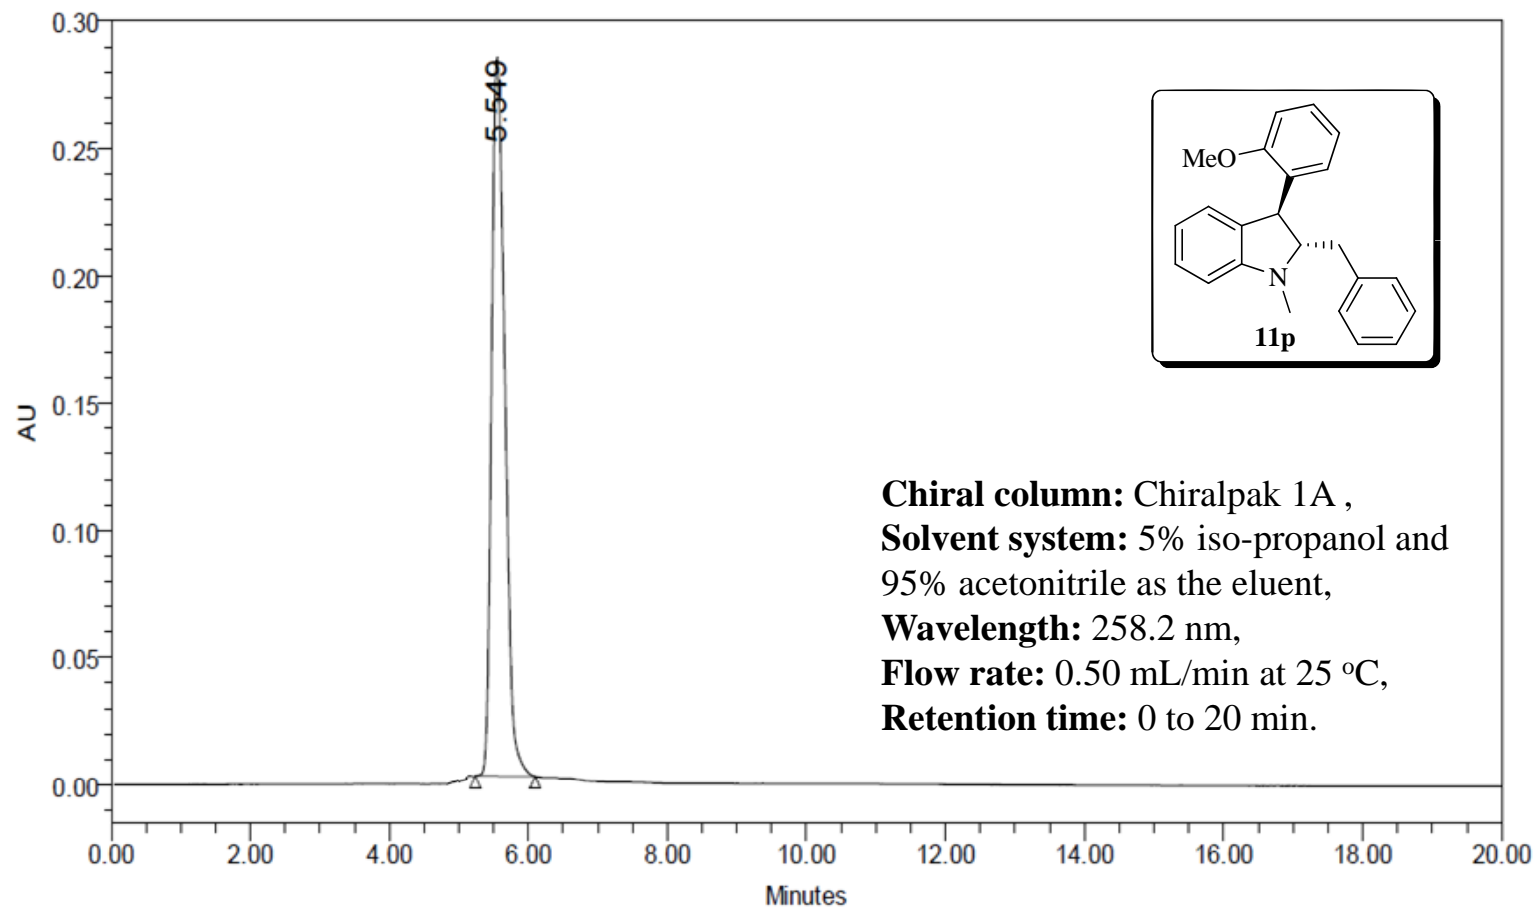

**Figure 144: HPLC -Spectrum of 11p.**

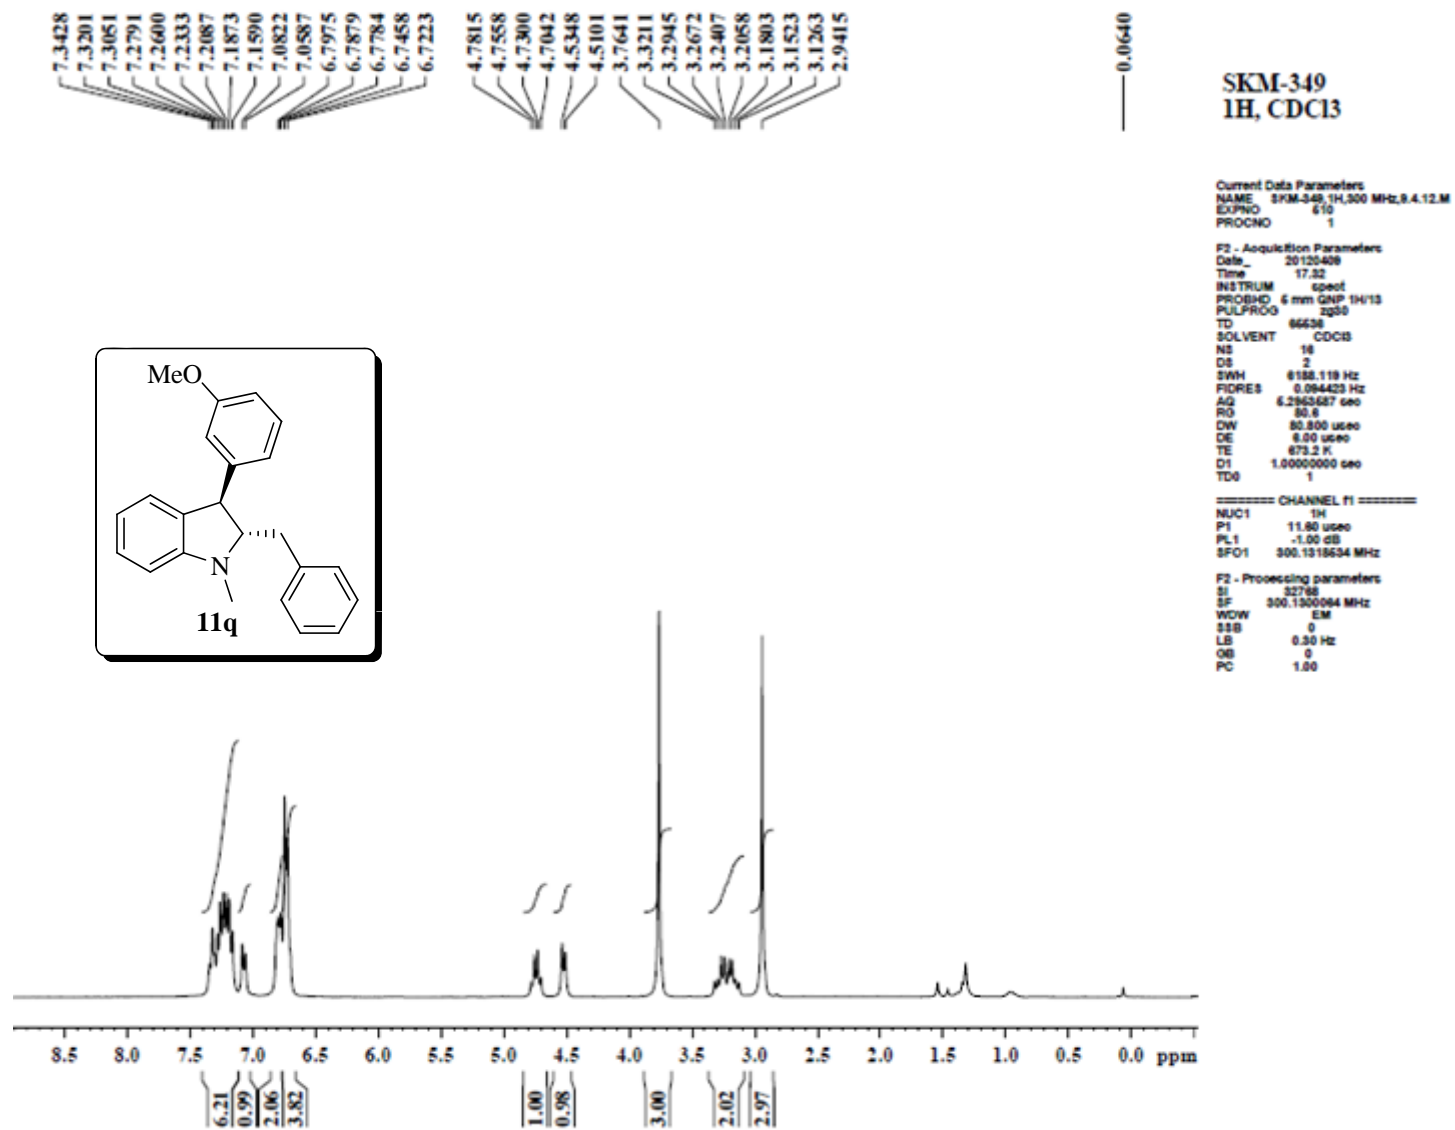

**Figure 145:**  $^1\text{H}$ -NMR Spectrum of **11q**.

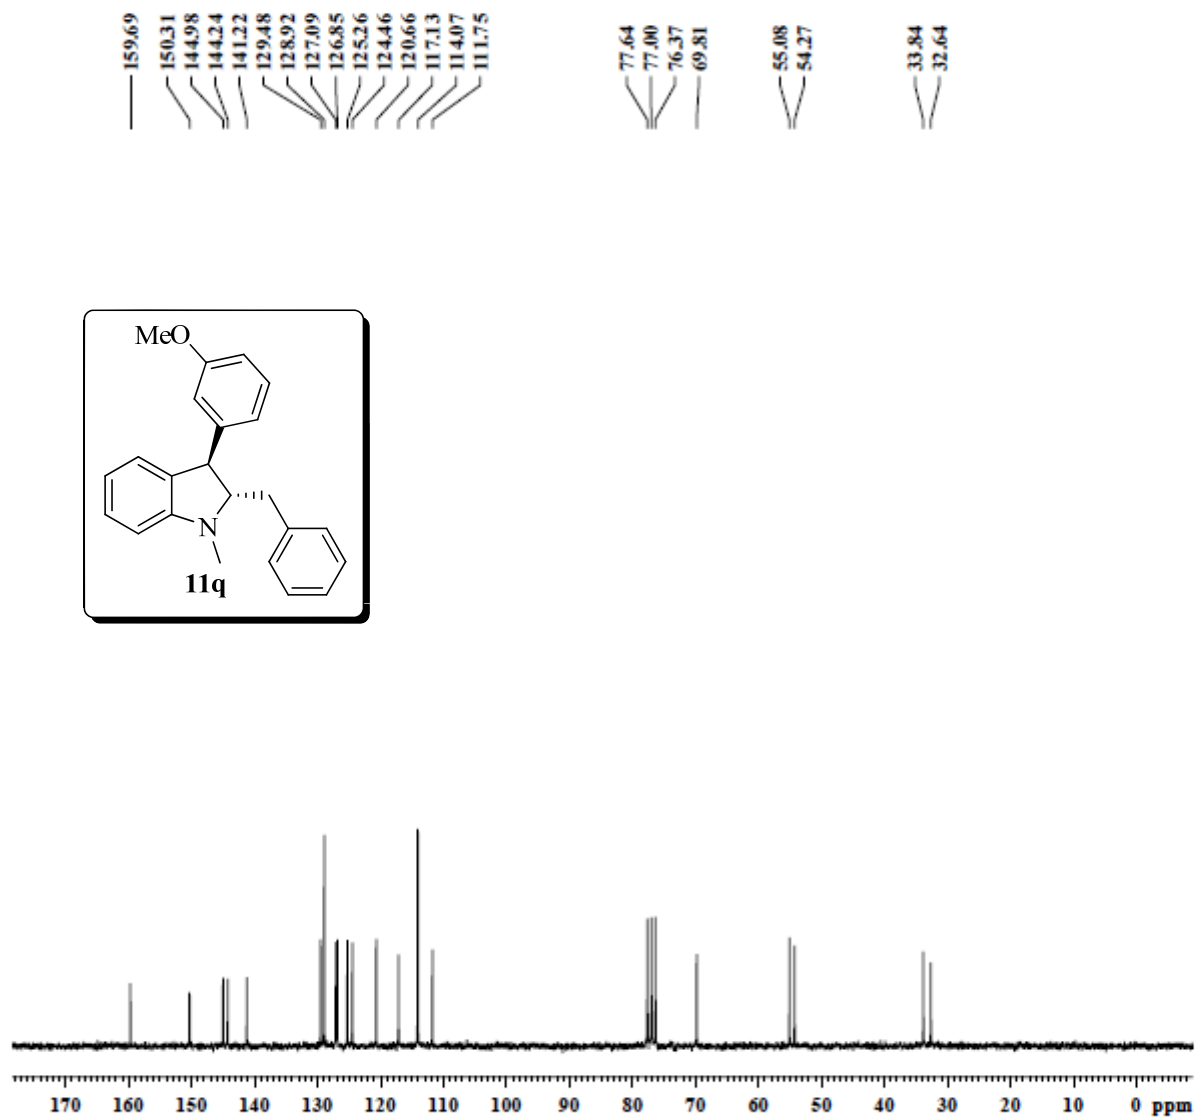

SKM-349  
13C, CDCl3

Current Data Parameters  
NAME SKM-349,13C,200 MHz,11.4,12.M  
EXPNO 360  
PROCNO 1

F2 - Acquisition Parameters  
Date\_ 20121011  
Time 10.50  
INSTRUM spect  
PROBHD 5 mm Dual 13C/  
PULPROG zgpg30  
TD 65536  
SOLVENT CDCl3  
NS 289  
DS 4  
SWH 11990.407 Hz  
FIDRES 0.182950 Hz  
AQ 2.7320011 sec  
RG 80.0  
DW 41.700 usec  
DE 6.00 usec  
TE 0.0 K  
D1 2.0000000 sec  
d11 0.0300000 sec  
DELTA 1.89999998 sec  
MCREST 0.0000000 sec  
MCWRK 0.01500000 sec

===== CHANNEL f1 =====  
NUC1 13C  
P1 6.30 usec  
PL1 -4.00 dB  
SFO1 50.3277658 MHz

===== CHANNEL f2 =====  
CPDPRG2 waltz16  
NUC2 1H  
PCPD2 100.00 usec  
PL2 -4.00 dB  
PL12 18.00 dB  
PL13 22.00 dB  
SFO2 200.1308005 MHz

F2 - Processing parameters  
SI 32768  
SF 50.3227343 MHz  
WDW EM  
SSB 0  
LB 1.00 Hz  
GB 0  
PC 1.40

Figure 146: <sup>13</sup>C -NMR Spectrum of **11q**.

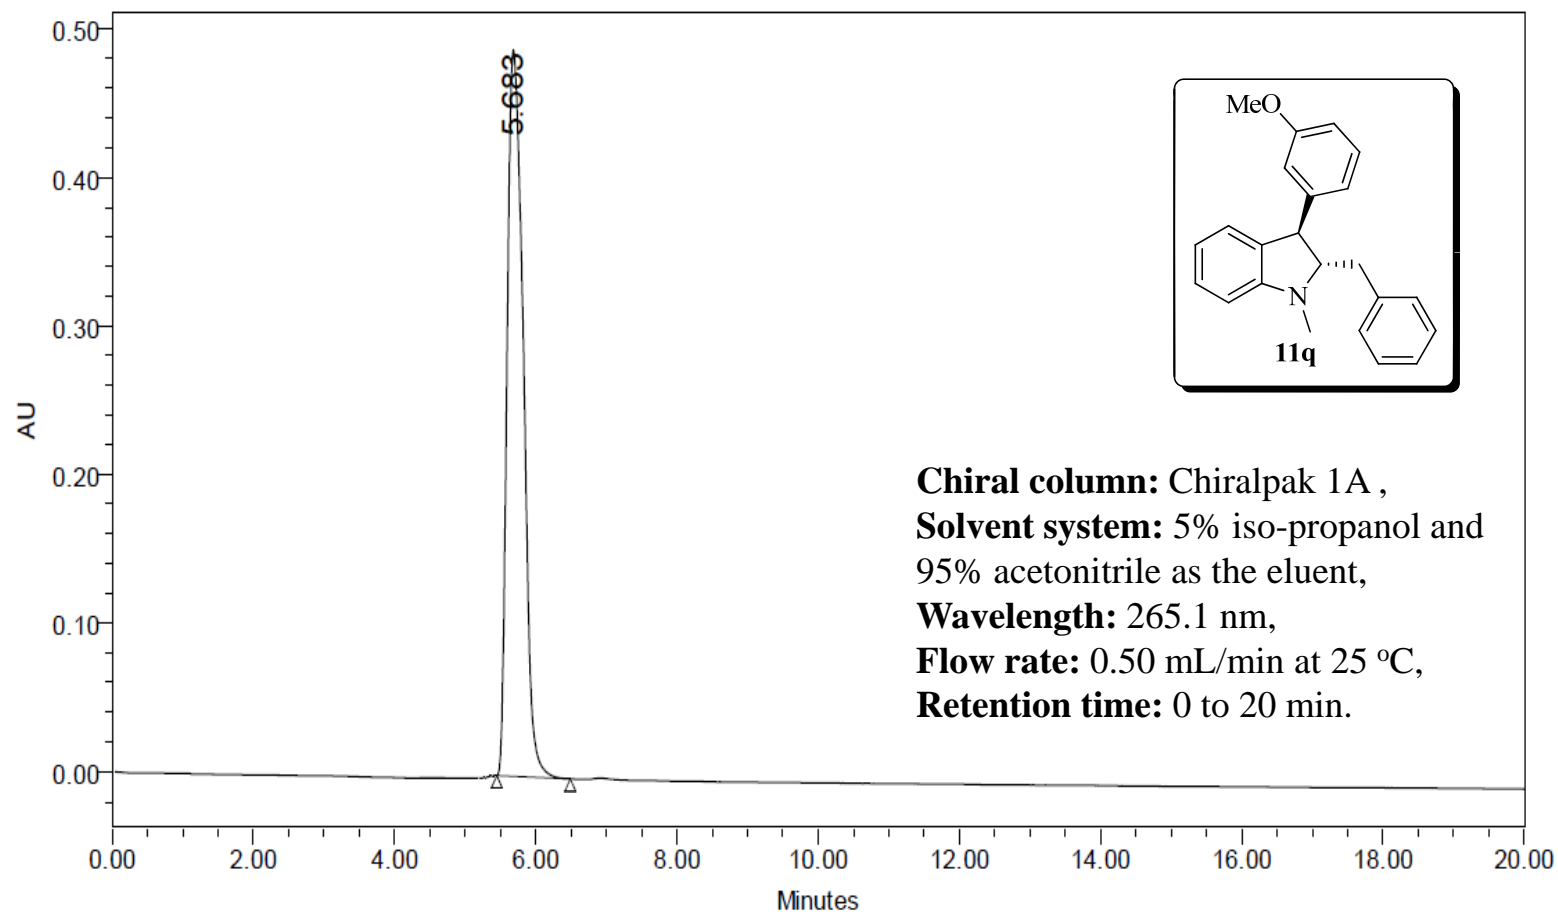

**Figure 147: HPLC -Spectrum of 11q.**

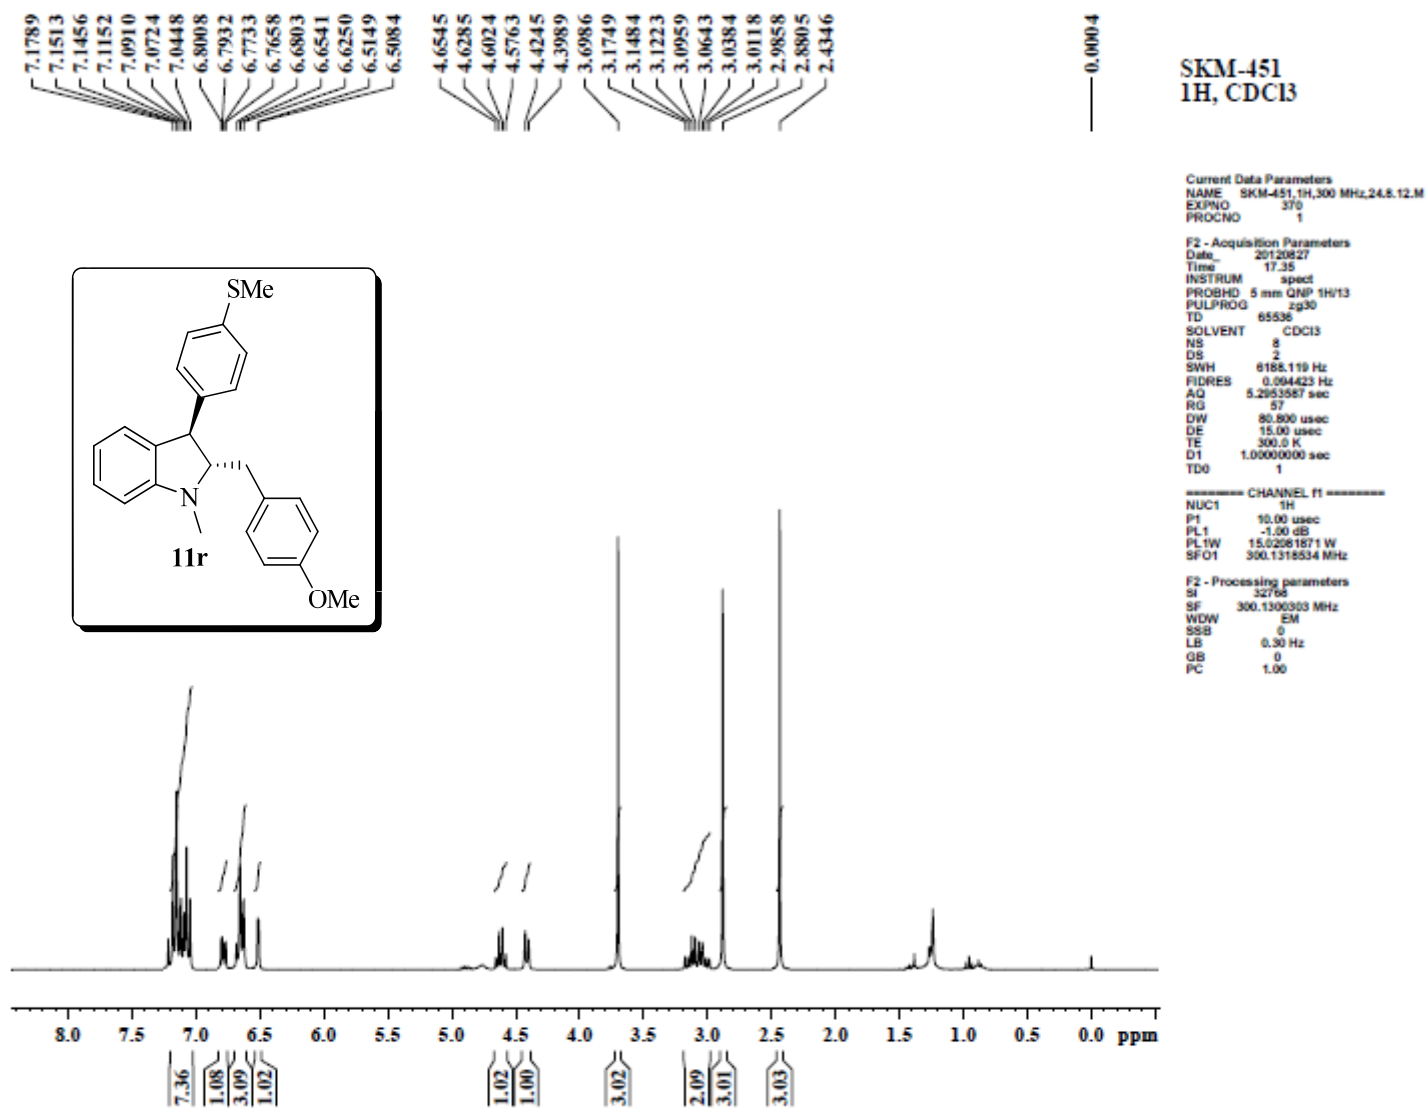

**Figure 148:**  $^1\text{H}$ -NMR Spectrum of **11r**.



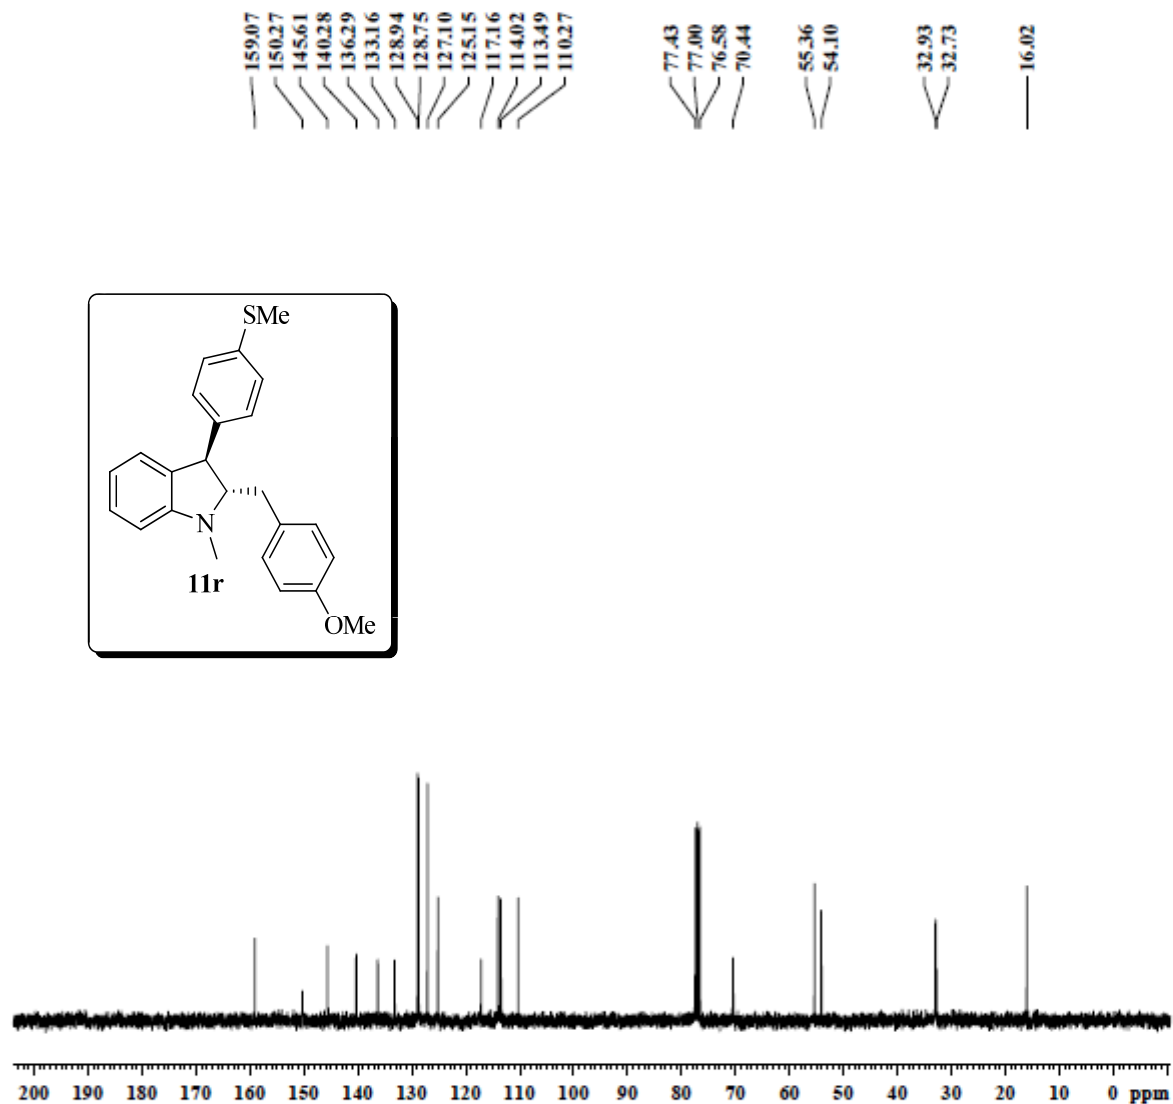

SKM-451  
13C, CDCl3

Current Data Parameters  
NAME SKM-451,13C,300 MHz,31.8.12.M  
EXPO 490  
PROCNO 1

F2 - Acquisition Parameters  
Date\_ 20120902  
Time\_ 12.32  
INSTRUM spect  
PROBHD 5 mm QNP 1H/13  
PULPROG zgpg30  
TD 65536  
SOLVENT CDCl3  
NS 58  
DS 4  
SWH 18023.846 Hz  
FIDRES 0.275096 Hz  
AQ 1.8175816 sec  
RG 2050  
DW 27.733 usec  
DE 15.00 usec  
TE 873.2 K  
D1 2.0000000 sec  
D11 0.0300000 sec  
TD0 1

===== CHANNEL f1 =====  
NUC1 13C  
P1 8.15 usec  
PL1 -3.00 dB  
PL1W 55.13059616 W  
SFO1 75.4752953 MHz

===== CHANNEL f2 =====  
CPDPRG2 waltz16  
NUC2 1H  
PCPD2 80.00 usec  
PL2 -1.00 dB  
PL12 17.06 dB  
PL13 21.00 dB  
PL2W 15.02091871 W  
PL12W 0.23478761 W  
PL13W 0.09477496 W  
SFO2 300.1312005 MHz

F2 - Processing parameters  
SI 32768  
SF 75.4677566 MHz  
WDW EM  
SSB 0  
LB 1.00 Hz  
GB 0  
PC 1.40

Figure 149: <sup>13</sup>C -NMR Spectrum of **11r**.

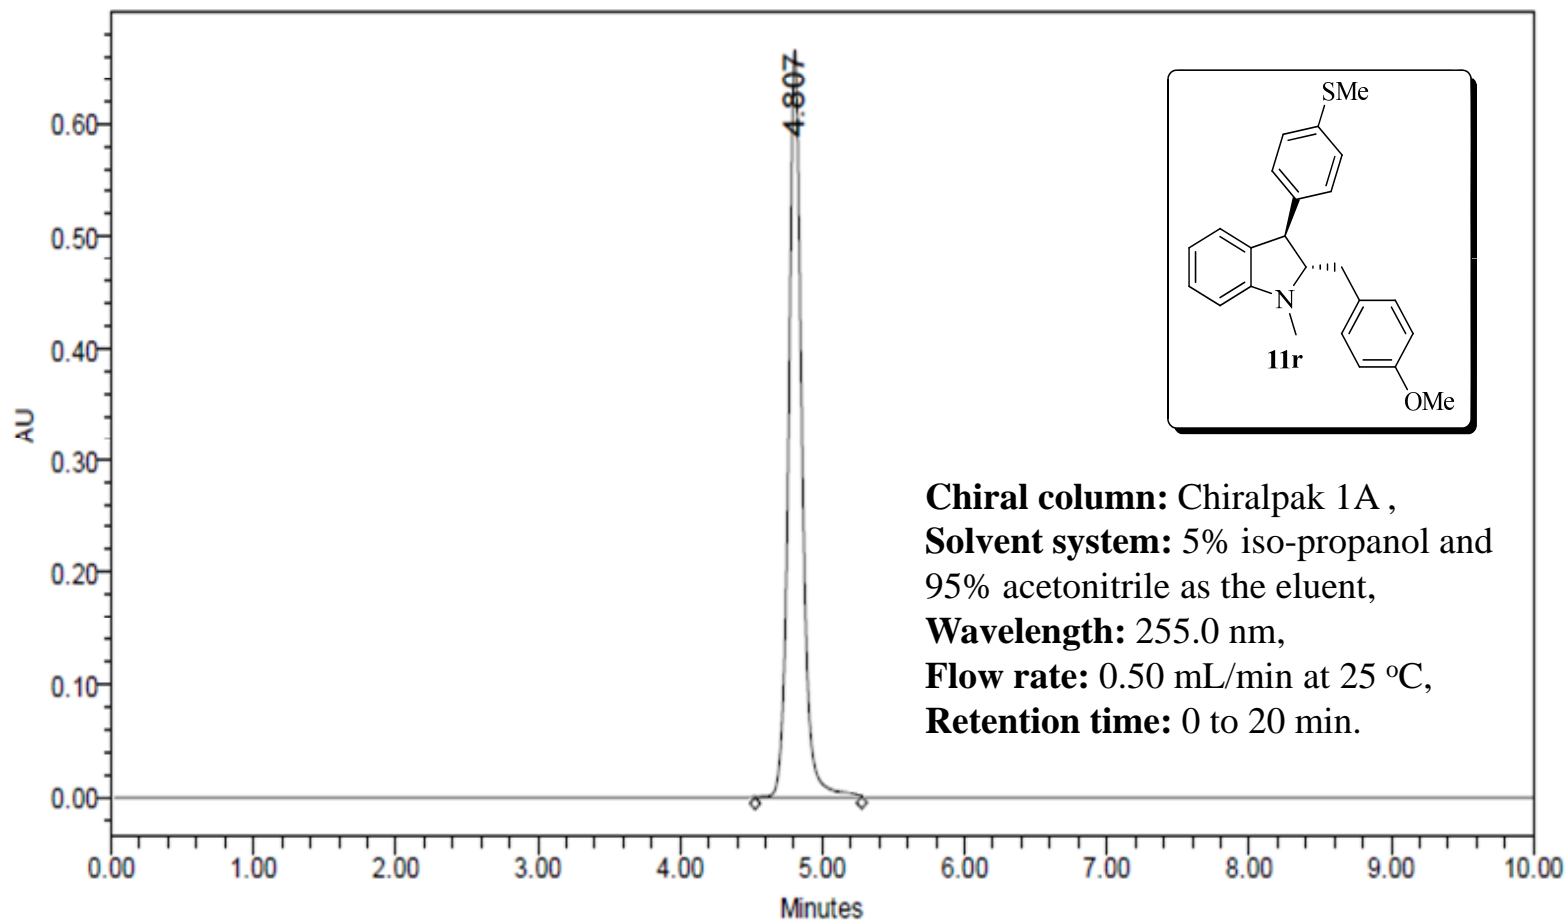

**Figure 150:** HPLC -Spectrum of **11r**.

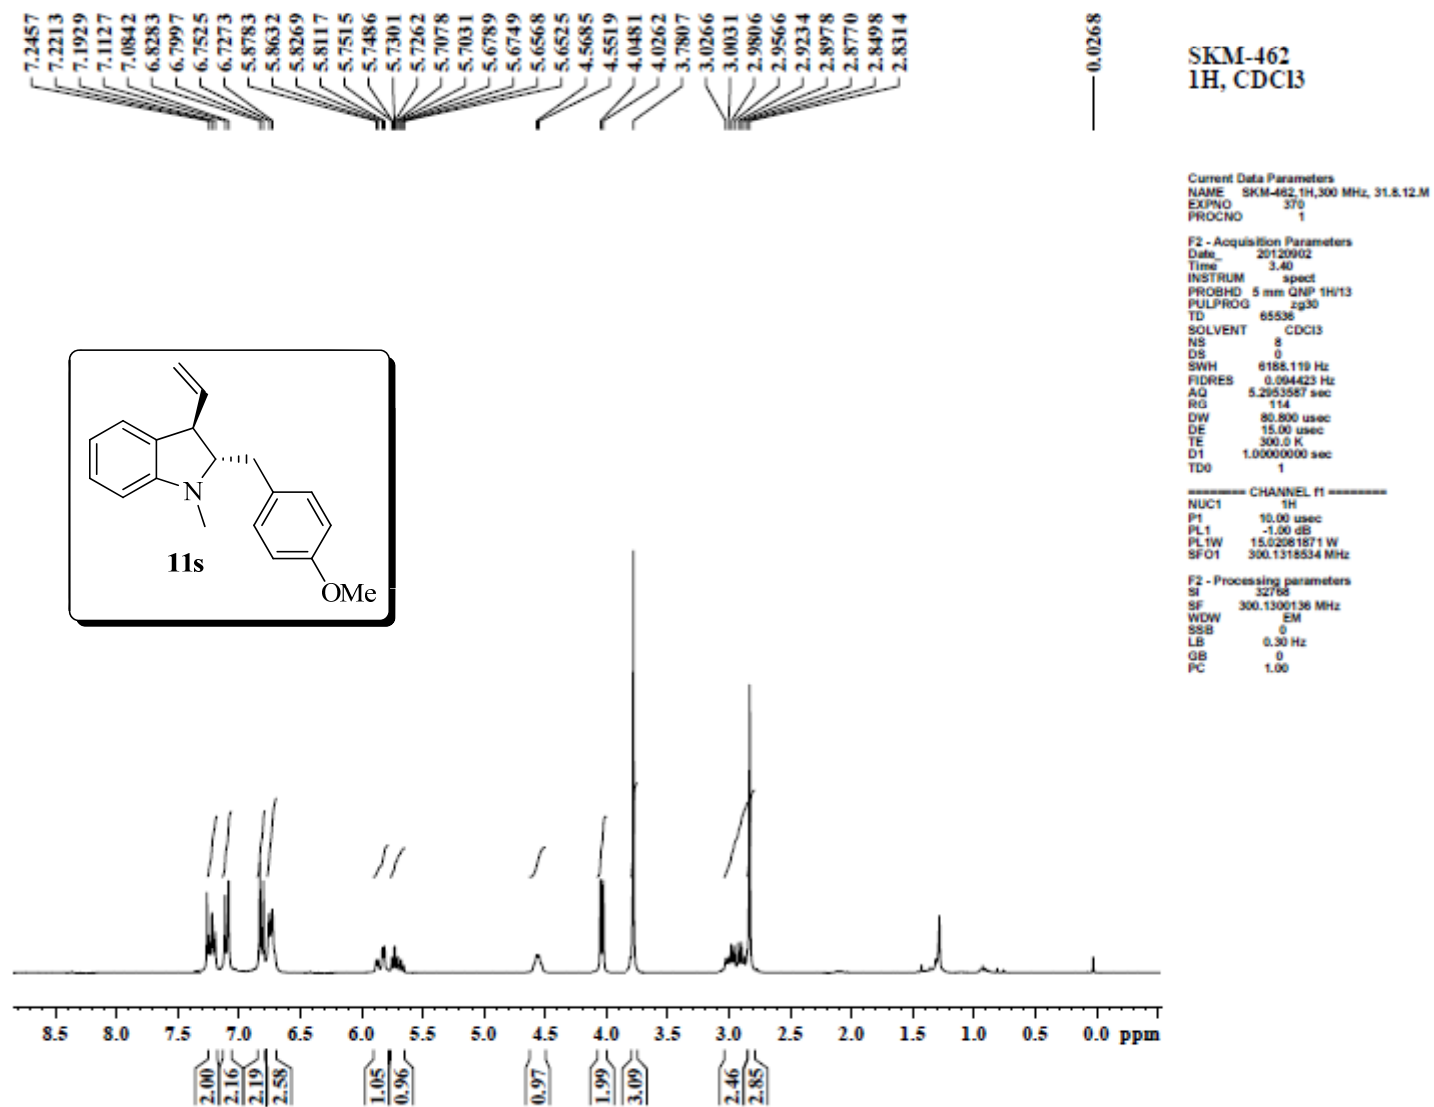

**Figure 151:**  $^1\text{H}$ -NMR Spectrum of **11s**.

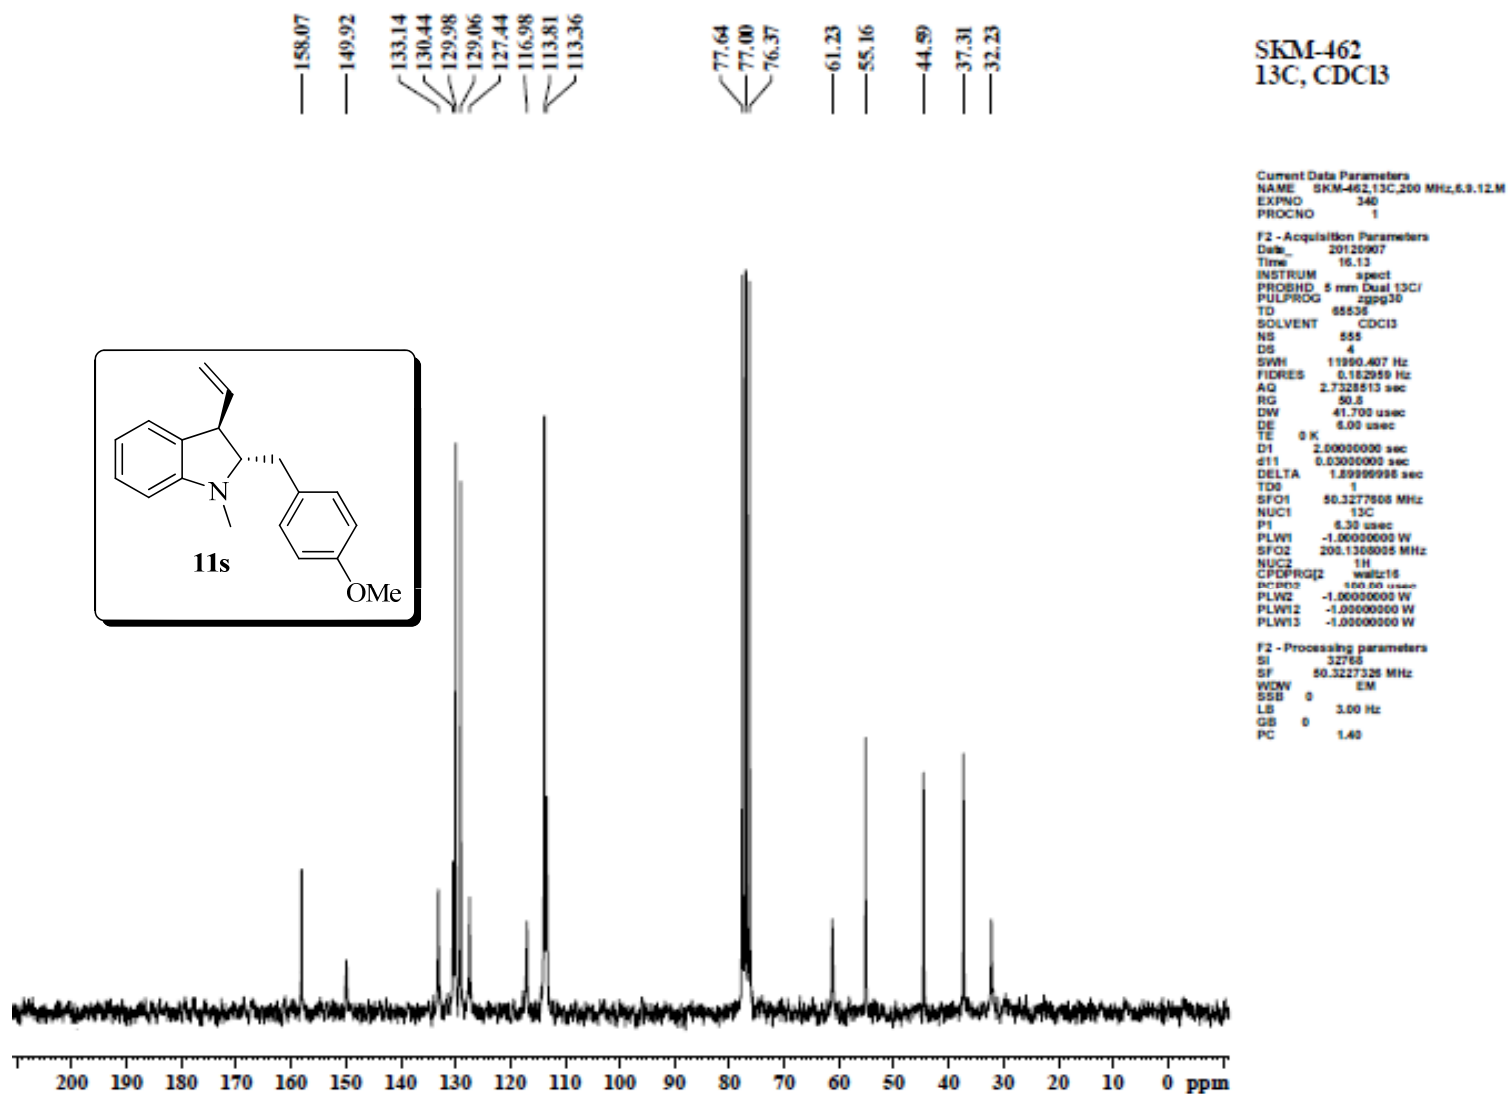

Figure 152:  $^{13}\text{C}$  -NMR Spectrum of **11s**.

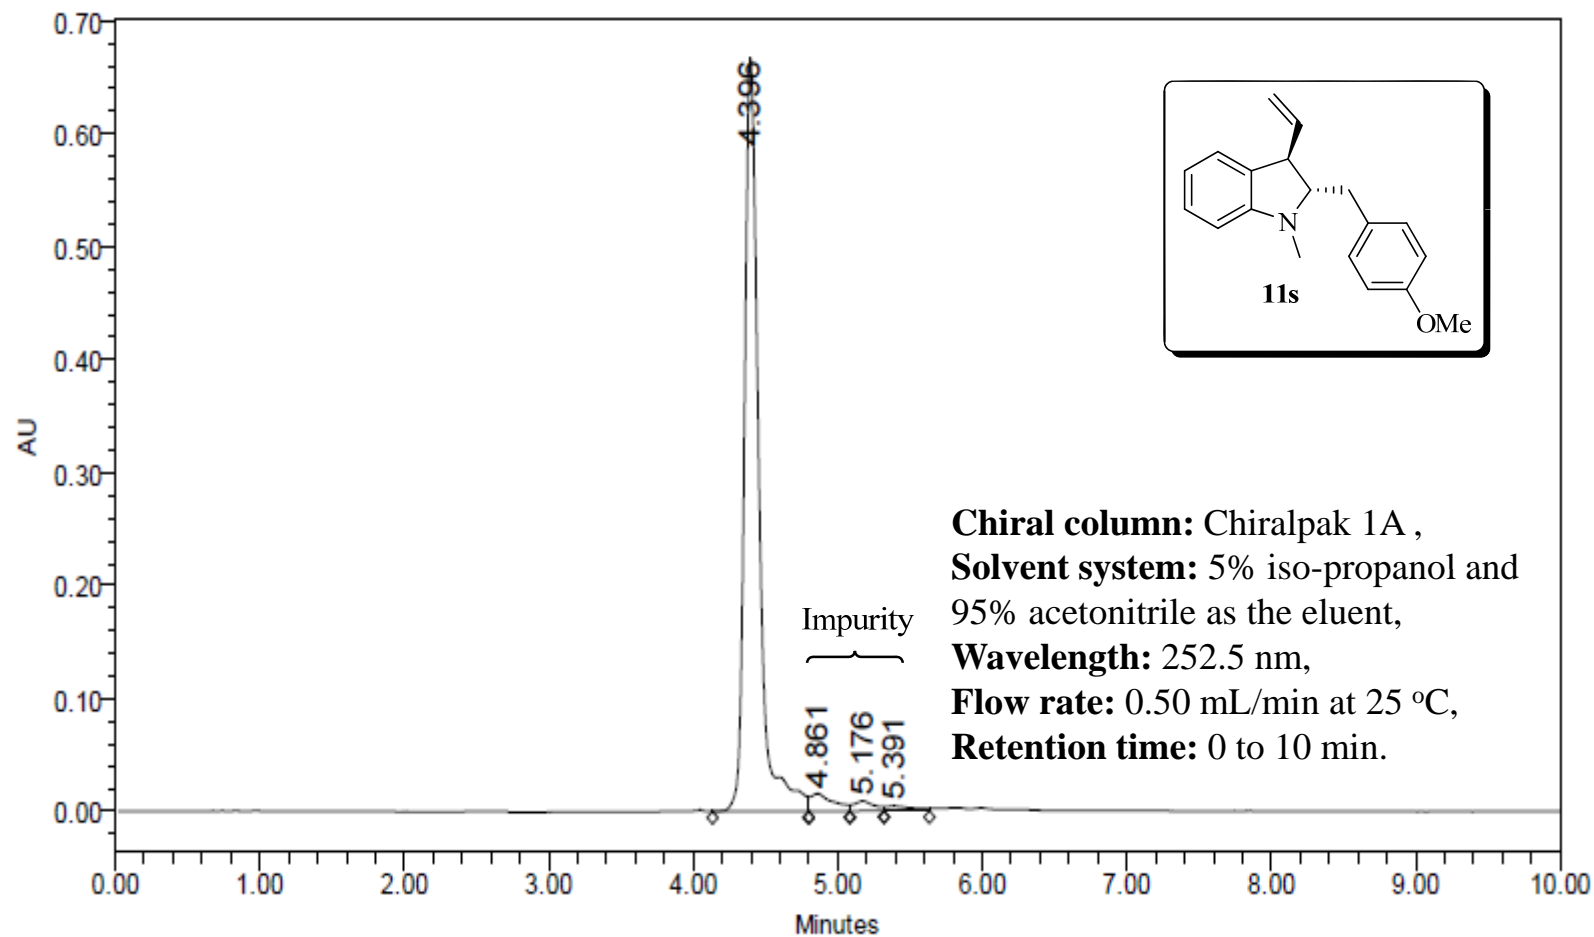

**Note:** The impurity species were collected and found by  $^1\text{H}$  NMR not to contain any isomeric forms of compound **11s**.

**Figure 153:** HPLC -Spectrum of **11s**.

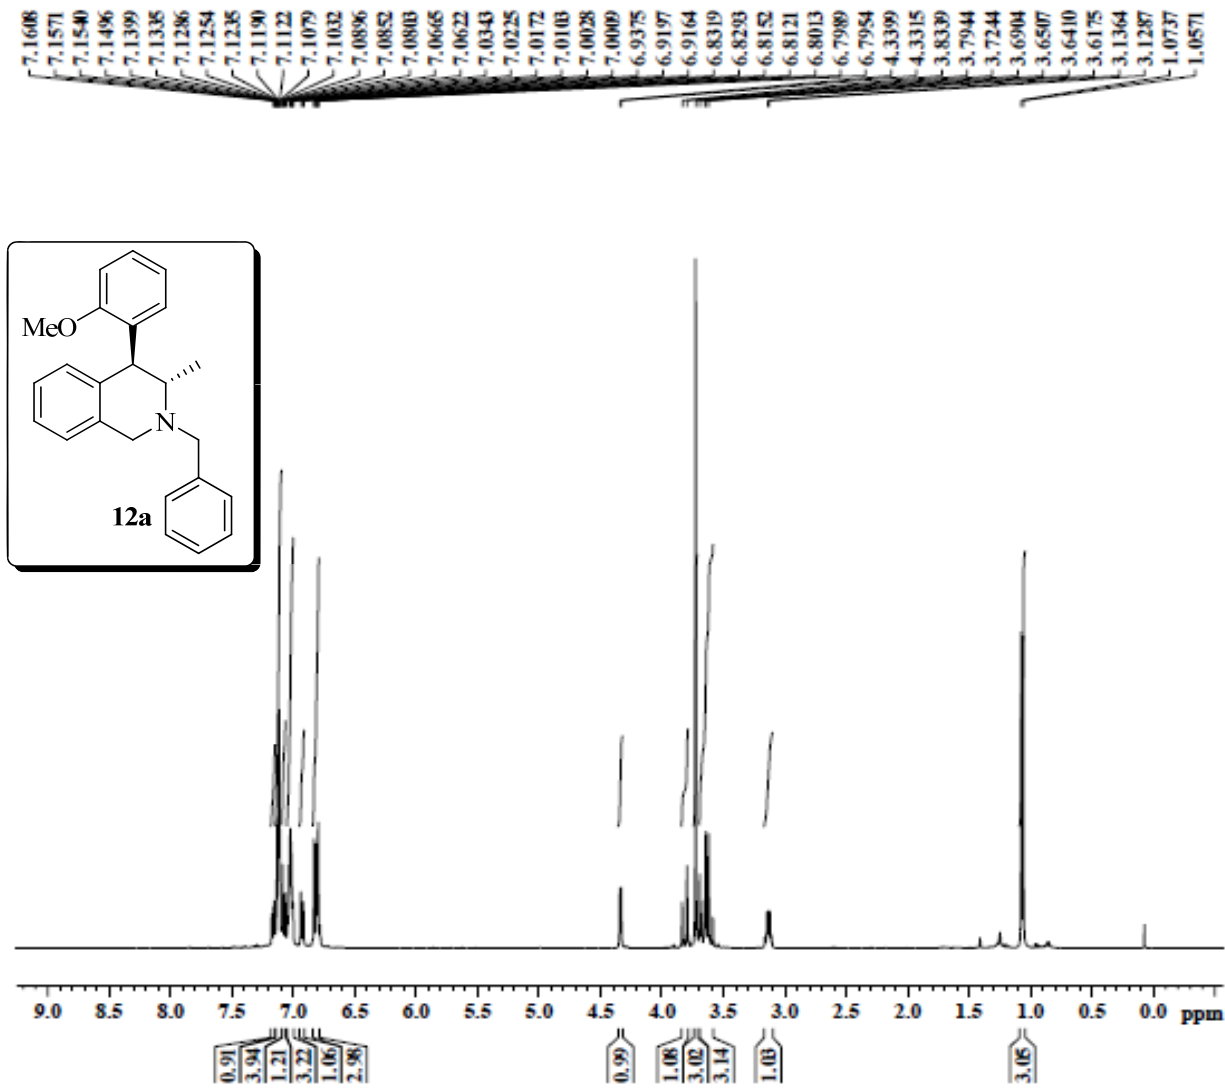

SKM-697  
1H, CDCl3

Current Data Parameters  
 NAME SKM-697-1H,400 MHz,4 Nov,2013.E  
 EXPNO 10  
 PROCNO 1

F2 - Acquisition Parameters  
 Date\_ 20131104  
 Time 20.02  
 INSTRUM spect  
 PROBHD 5 mm PABBO BB/  
 PULPROG zg30  
 TD 65536  
 SOLVENT CDCl3  
 NS 10  
 DS 2  
 SWH 8012.820 Hz  
 FIDRES 0.122266 Hz  
 AQ 4.0894485 sec  
 RG 31.99  
 CW 62.400 usec  
 DE 6.50 usec  
 TE 298.0 K  
 D1 1.00000000 sec  
 TDO 1

\*\*\*\*\* CHANNEL f1 \*\*\*\*\*  
 SFO1 400.1629712 MHz  
 NUC1 1H  
 P1 12.35 usec  
 PLW1 14.00000000 W

F2 - Processing parameters  
 SI 65536  
 SF 400.1605495 MHz  
 WDW EM  
 SSB 0  
 LB 0.30 Hz  
 GB 0  
 PC 1.00

Figure 154: <sup>1</sup>H -NMR Spectrum of 12a.

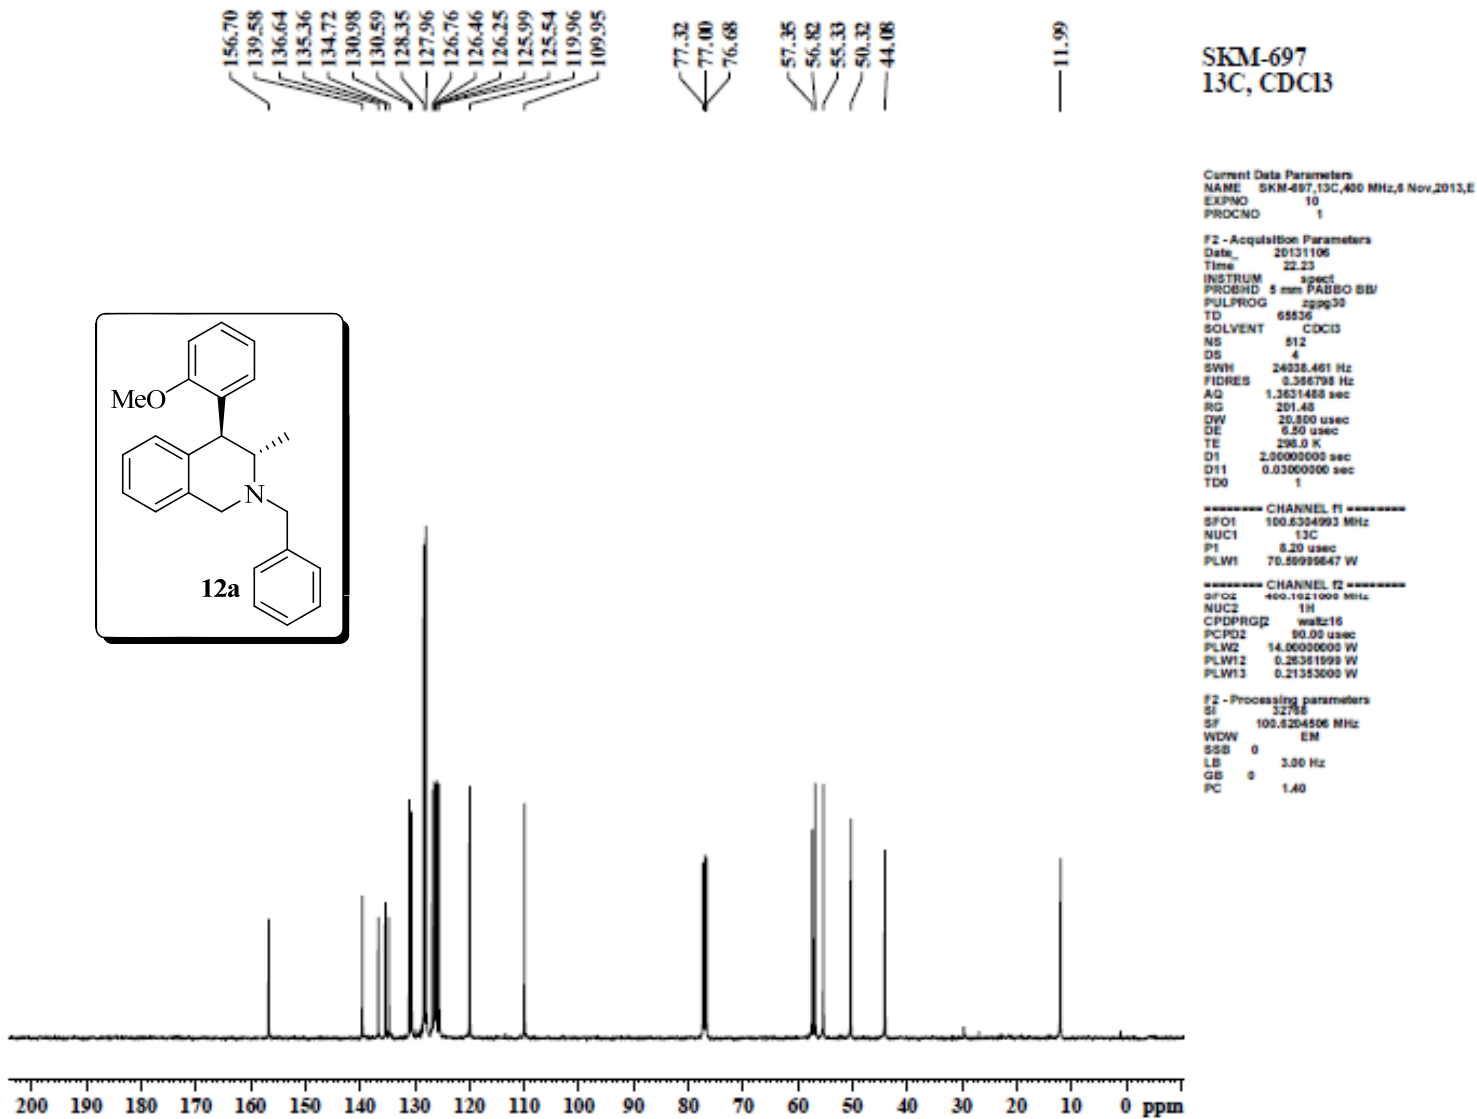

Figure 155:  $^{13}\text{C}$  -NMR Spectrum of 12a.

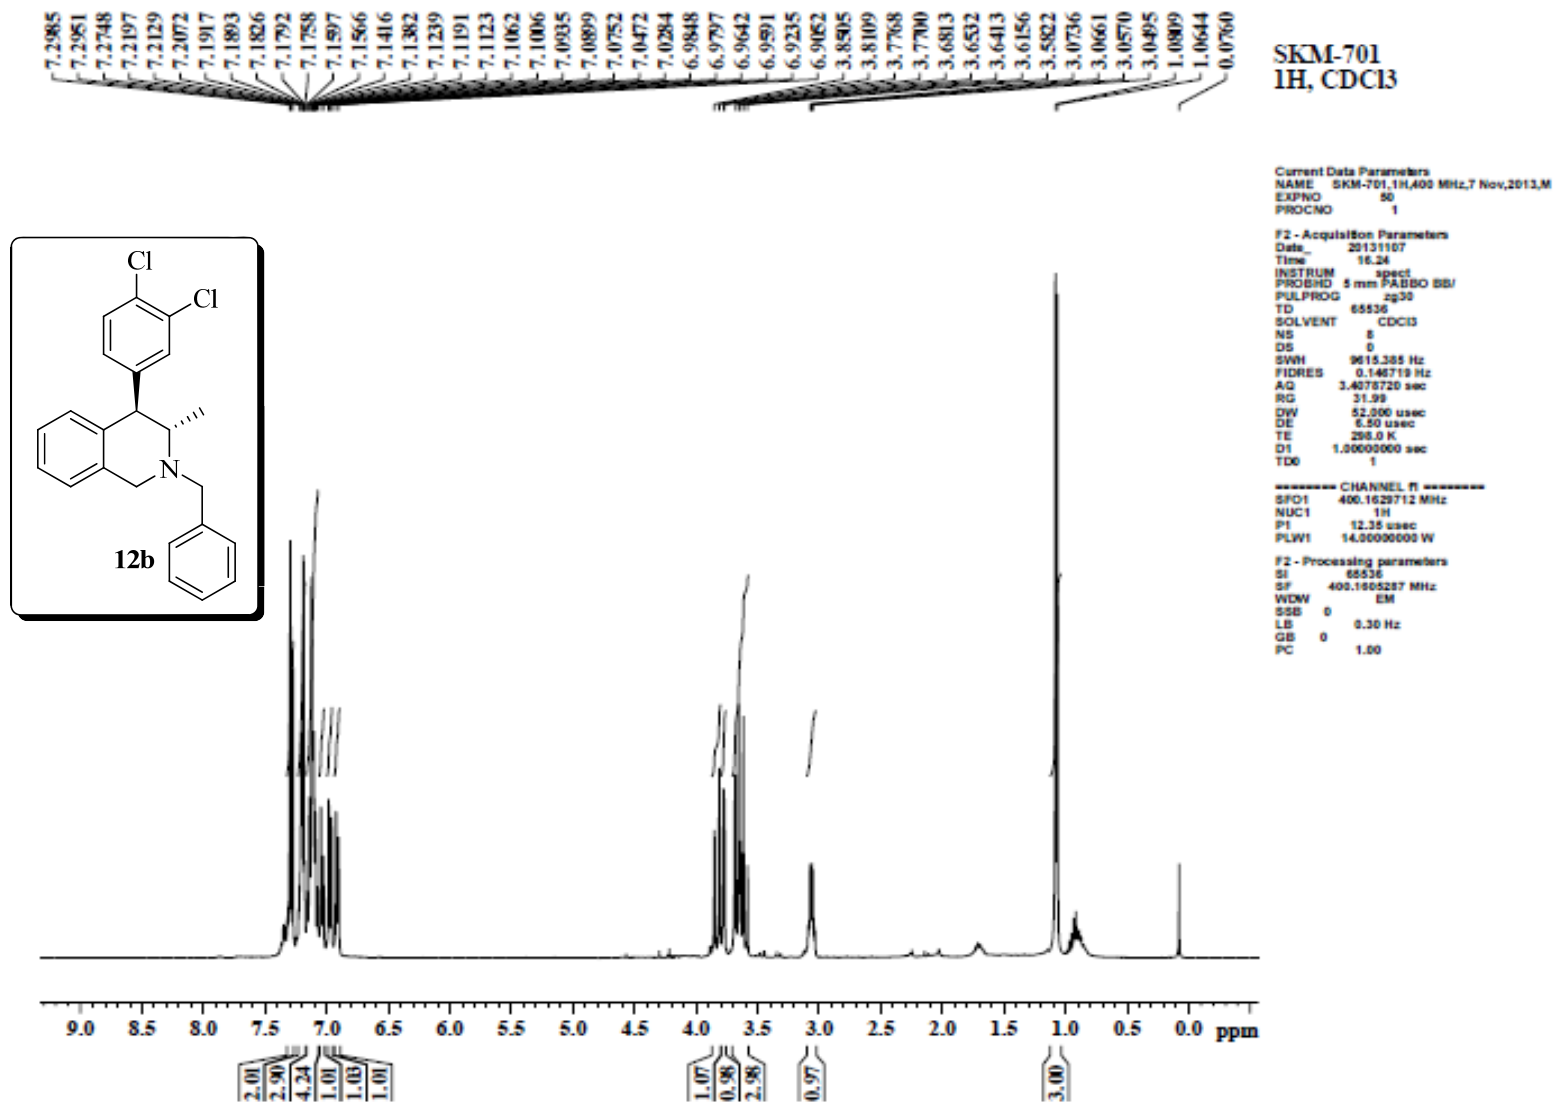

**Figure 156: <sup>1</sup>H -NMR Spectrum of 12b.**



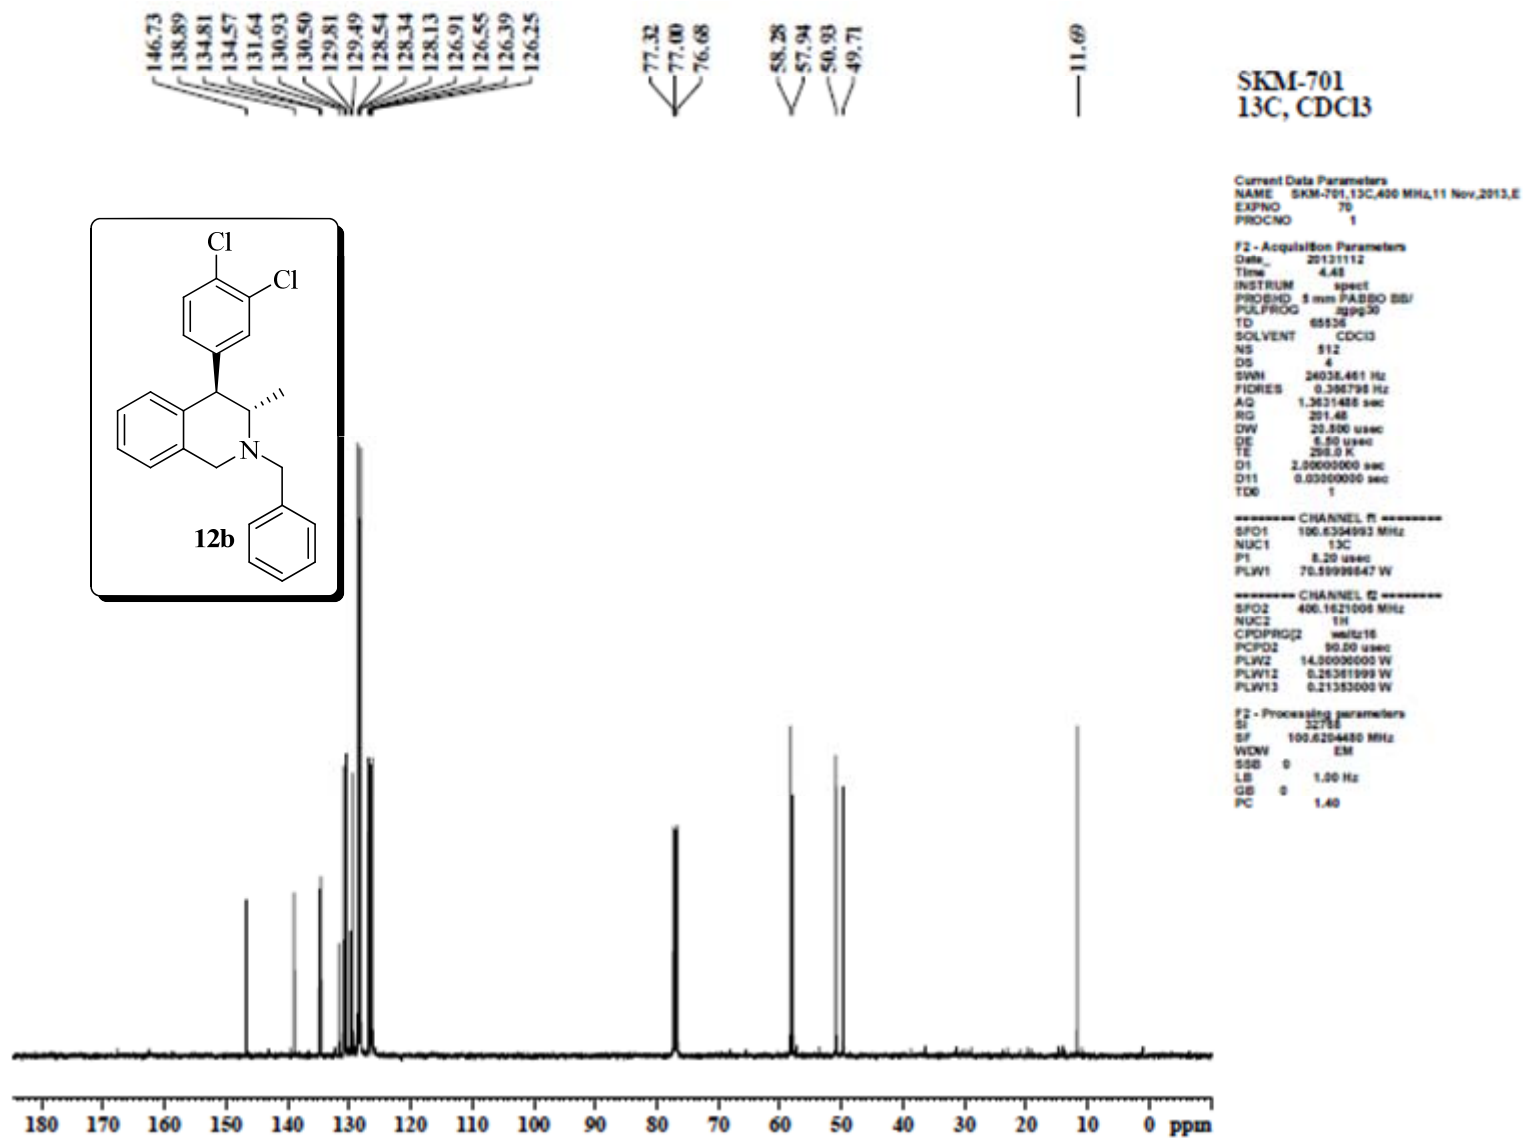

**Figure 157:**  $^{13}\text{C}$  -NMR Spectrum of **12b**.

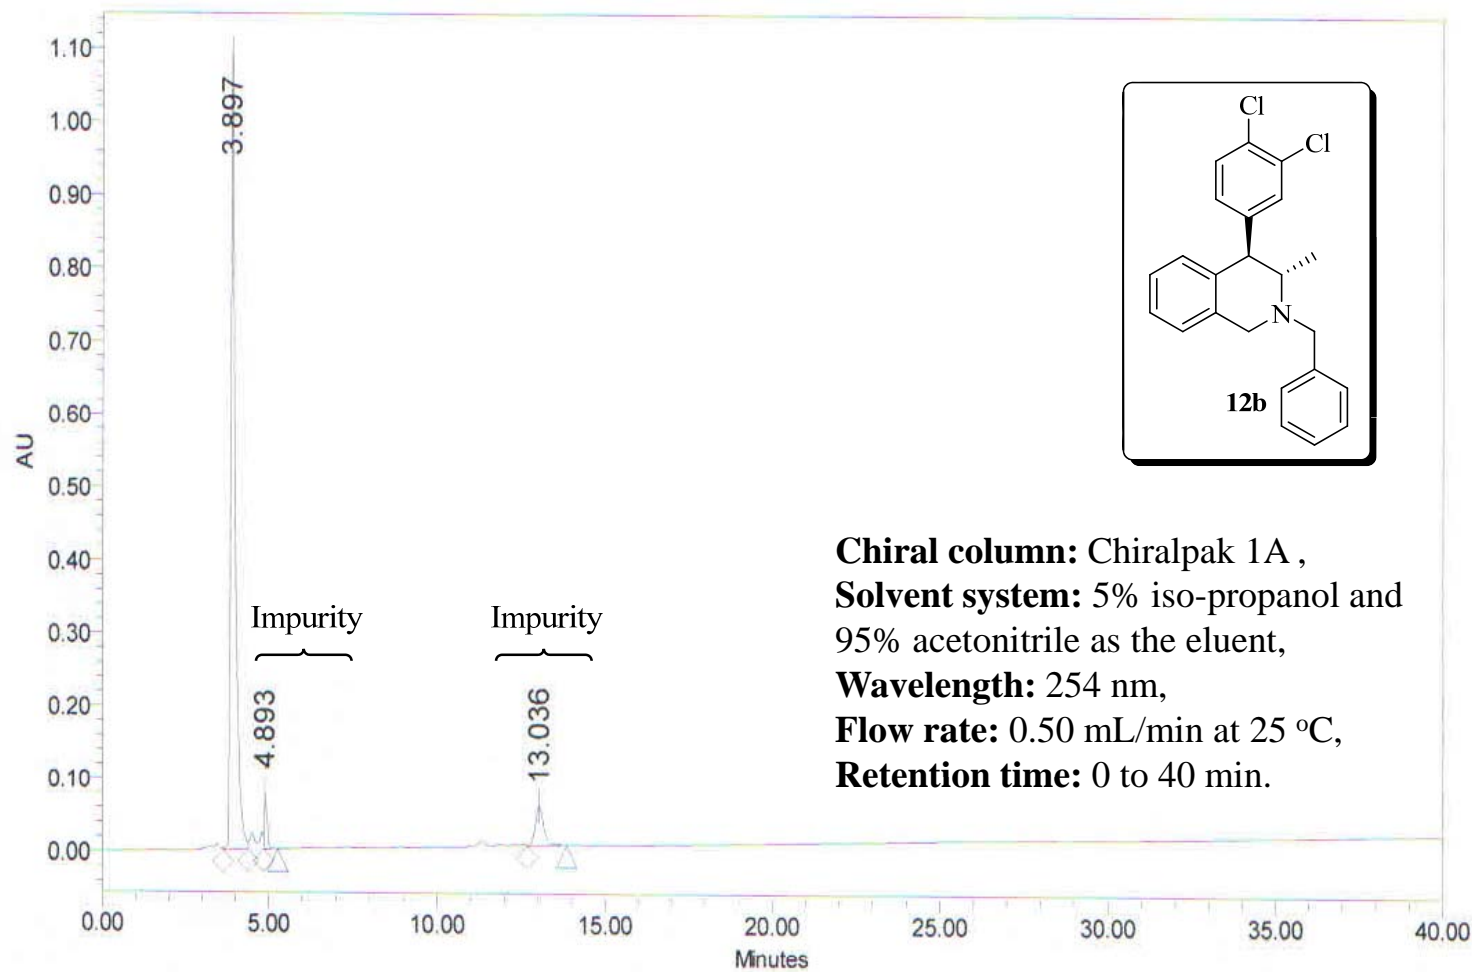

**Note:** The impurity species were collected and found by  $^1\text{H}$  NMR not to contain any isomeric forms of compound **12b**.

**Figure 158:** HPLC -Spectrum of **12b**.

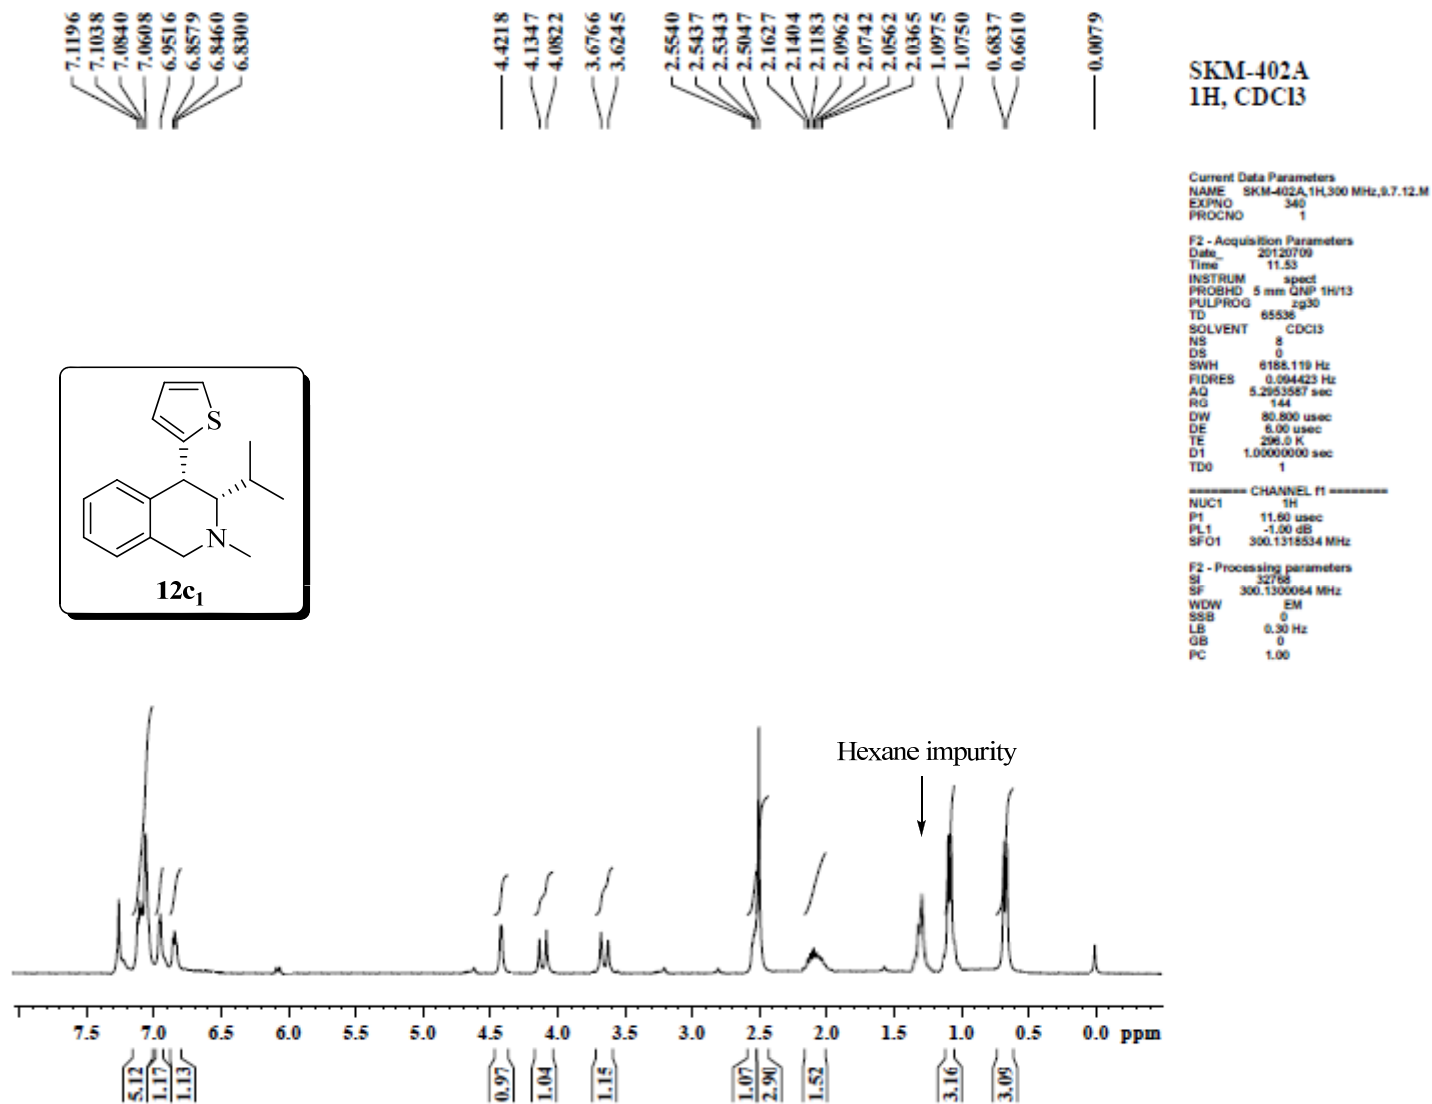

**Figure 159: <sup>1</sup>H -NMR Spectrum of 12c<sub>1</sub>.**

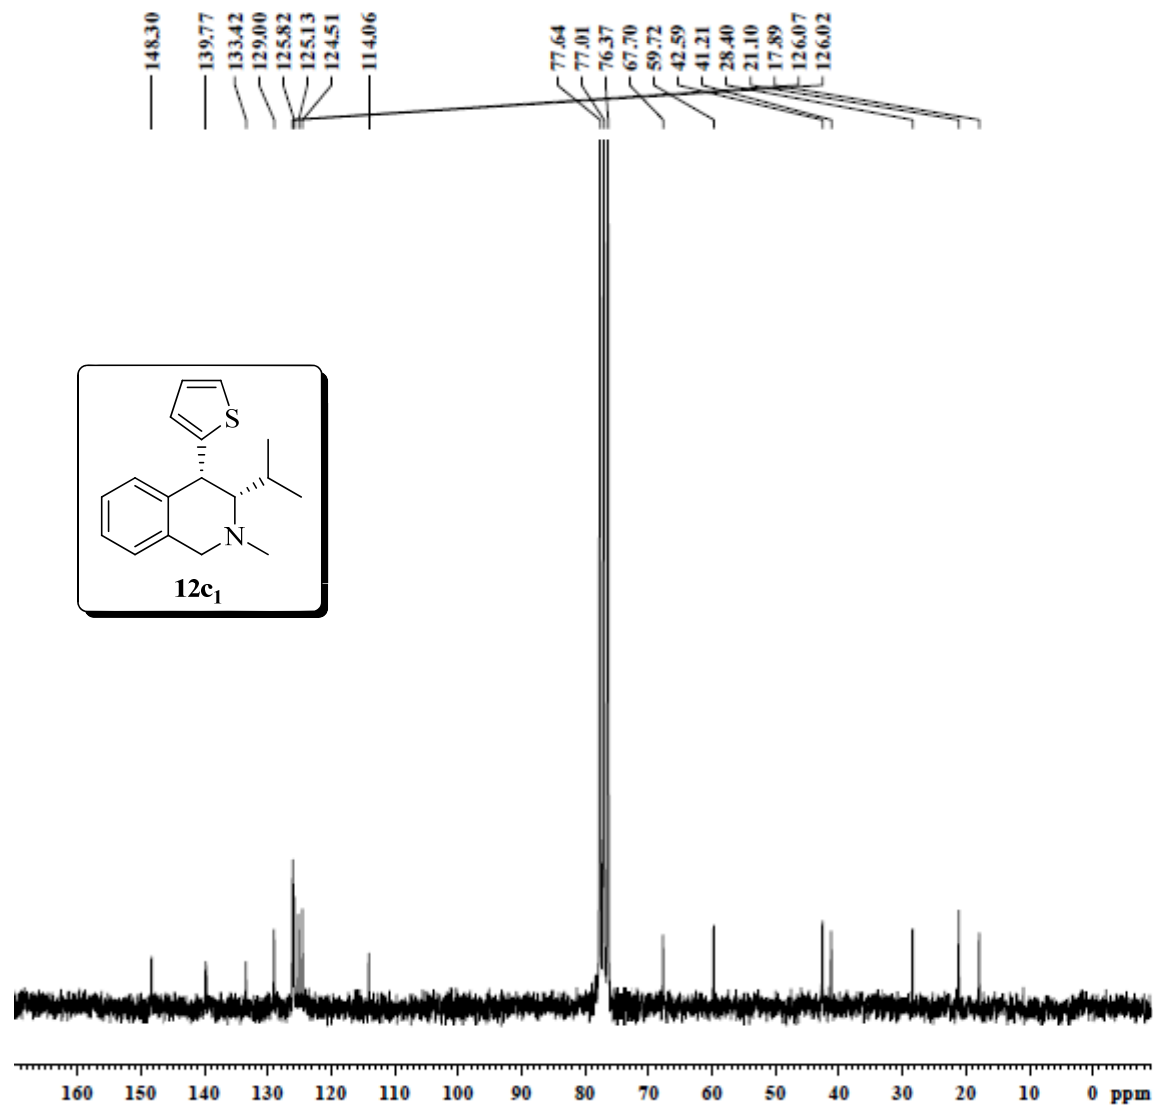

SKM-402A  
13C, CDC13

Current Data Parameters  
NAME SKM-402A,13C,200 MHz,30.7.12.M  
EXPNO 320  
PROCNO 1

F2 - Acquisition Parameters  
Date\_ 20120730  
Time 14.16  
INSTRUM spect  
PROBHD 5 mm Dual 13C/  
PULPROG zgpg30  
TD 65536  
SOLVENT CDC13  
NS 2048  
DS 0  
SWH 12562.814 Hz  
FIDRES 0.191693 Hz  
AQ 2.663827 sec  
RG 203.2  
DW 39.800 usec  
DE 6.00 usec  
TE 0.0 K  
D1 2.00000000 sec  
d11 0.03000000 sec  
DELTA 1.89999998 sec  
MCREST 0.00000000 sec  
MCWIRK 0.01500000 sec

===== CHANNEL f1 =====  
NUC1 13C  
P1 6.30 usec  
PL1 -4.00 dB  
SFO1 90.3277608 MHz

===== CHANNEL f2 =====  
CPRPROG2 waltz16  
NUC2 1H  
PCPD2 100.00 usec  
PL2 -4.00 dB  
PLT2 18.00 dB  
PLT3 22.00 dB  
SFO2 200.1308005 MHz

F2 - Processing parameters  
SI 32768  
SF 50.3227504 MHz  
WDW EM  
SSB 0  
LB 1.00 Hz  
GB 0  
PC 1.40

Figure 160: <sup>13</sup>C -NMR Spectrum of **12c<sub>1</sub>**.

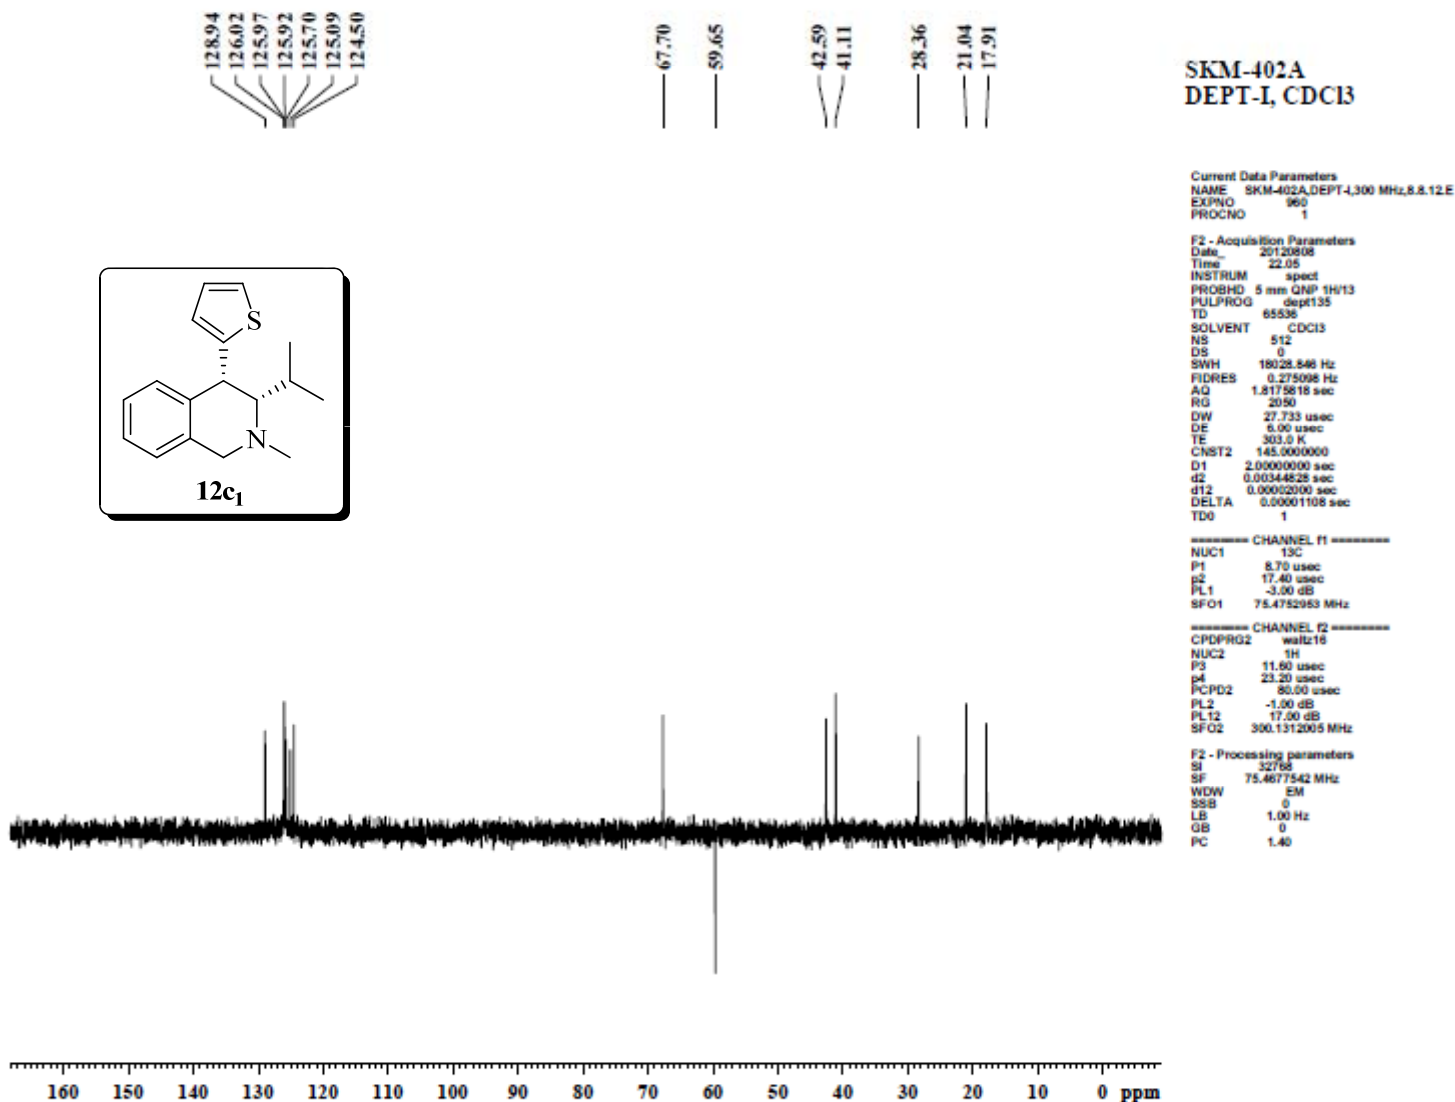

**Figure 161: DEPT-I -Spectrum of 12c<sub>1</sub>.**

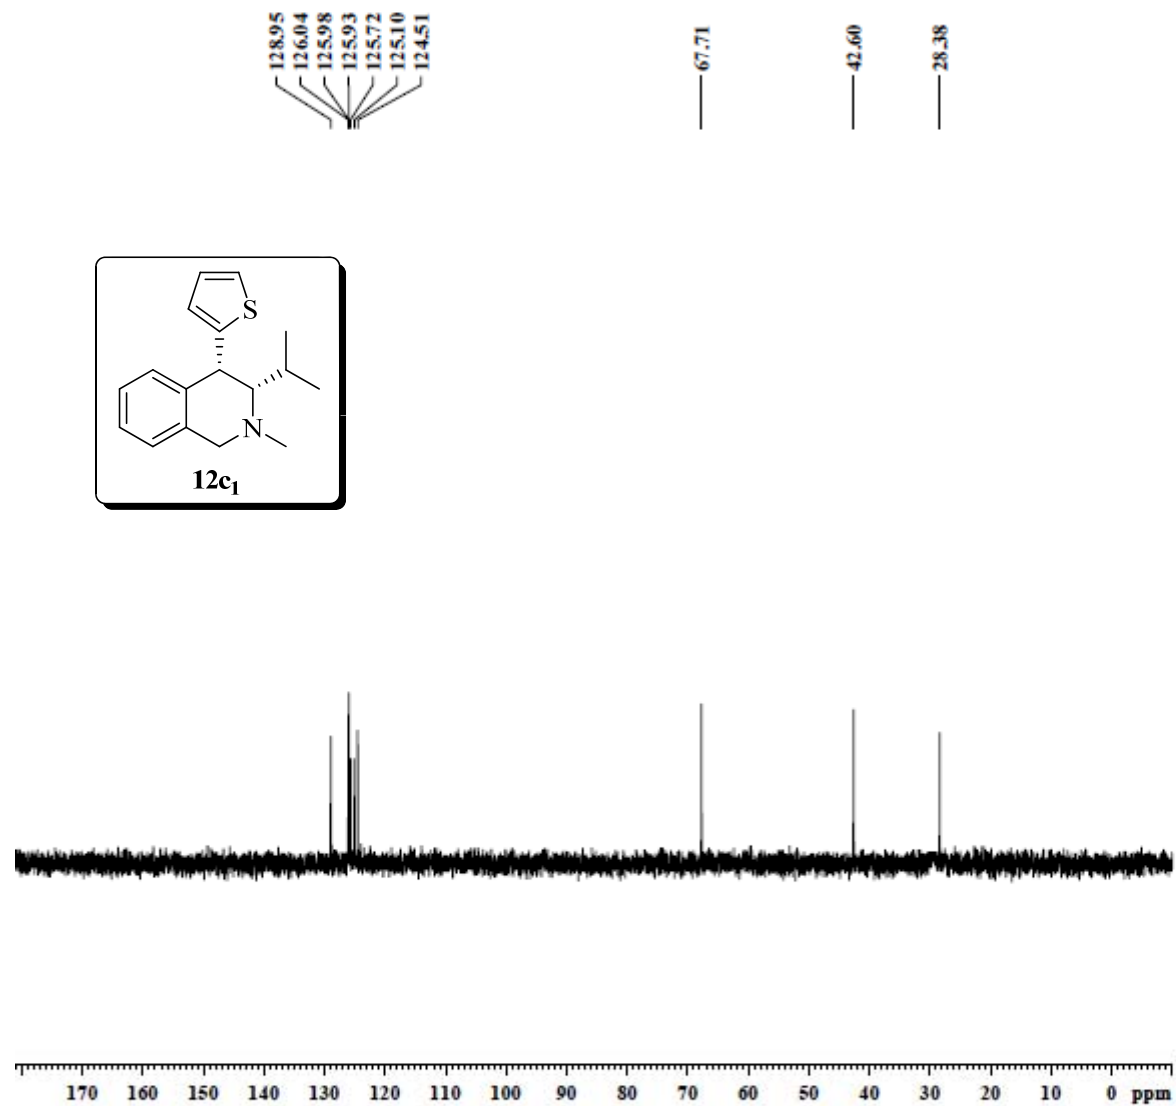

SKM-402A  
DEPT-II,CDC13

Current Data Parameters  
NAME SKM-402A,DEPT-II,300 MHz,8.8.12.E  
EXPNO 961  
PROCNO 1

F2 - Acquisition Parameters  
Date\_ 20130808  
Time 22.30  
INSTRUM spect  
PROBHD 5 mm QNP 1H/13  
PULPROG dept90  
TD 65536  
SOLVENT CDC13  
NS 812  
DS 0  
SWH 18028.846 Hz  
FIDRES 0.275008 Hz  
AQ 1.8175818 sec  
RG 2053  
DNV 27.733 usec  
DE 8.00 usec  
TE 303.0 K  
CHST2 148.0000000  
D1 2.00000000 sec  
d2 0.00344828 sec  
d12 0.00002000 sec  
DELTA 0.00001106 sec  
TD0 1

----- CHANNEL f1 -----  
NUC1 13C  
P1 8.70 usec  
p2 17.40 usec  
PL1 -3.00 dB  
SFO1 75.4752053 MHz

----- CHANNEL f2 -----  
CPDPRG2 waltz16  
NUC2 1H  
P3 11.80 usec  
p4 23.20 usec  
PCPD2 50.00 usec  
PL2 -1.00 dB  
PL12 17.00 dB  
SFO2 300.1312005 MHz

F2 - Processing parameters  
SI 32768  
SF 75.4677432 MHz  
WOW EM  
SSB 0  
LB 1.00 Hz  
GB 0  
PC 1.40

Figure 162: DEPT-II -Spectrum of **12c<sub>1</sub>**.

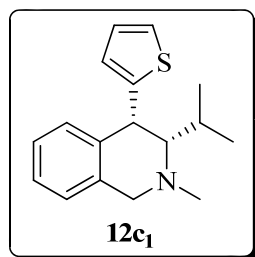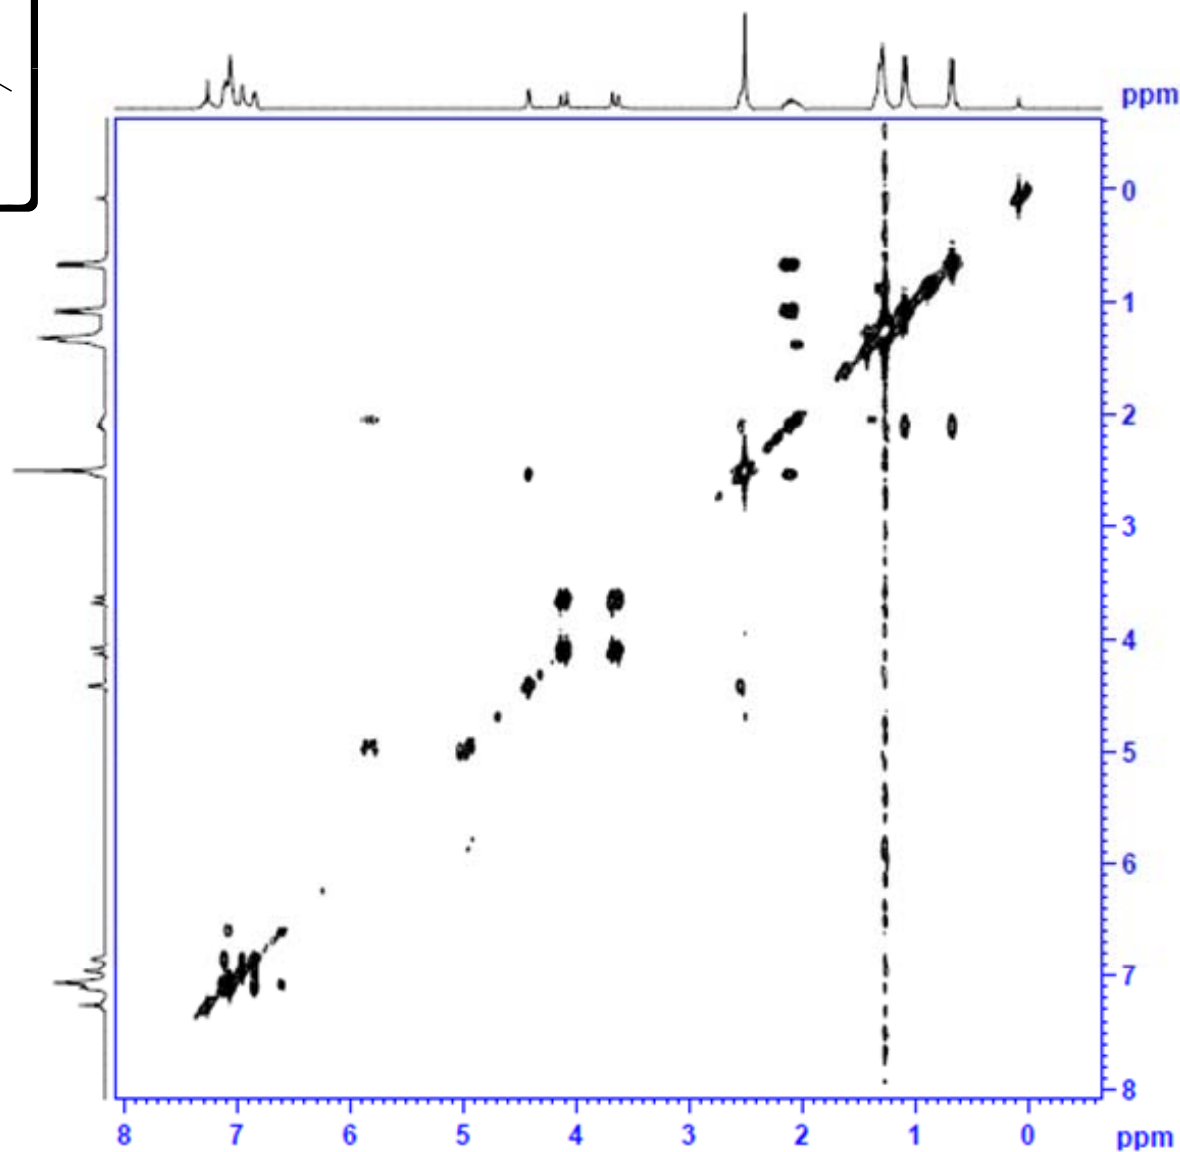

**SKM-402A  
COSY, CDCl<sub>3</sub>**

Current Data Parameters  
 NAME SKM-402A.COSY,300 MHz,18.7.12.  
 EXPNO 981  
 PROCNO 1

F2 - Acquisition Parameters  
 Date\_ 20120718  
 Time 23.32  
 INSTRUM spect  
 PROBHD 5 mm QNP 1H/13  
 PULPROG cosyypof  
 TD 2048  
 SOLVENT CDCl<sub>3</sub>  
 NS 18  
 DS 8  
 SWH 2617.801 Hz  
 FIDRES 1.278223 Hz  
 AQ 0.3912180 sec  
 RG 64  
 DW 191.000 usec  
 DE 6.00 usec  
 TE 302.7 K  
 d0 0.00000300 sec  
 D1 1.35131395 sec  
 d13 0.00000400 sec  
 D18 0.00020000 sec  
 INO 0.00038200 sec

----- CHANNEL f1 -----  
 NUC1 1H  
 P0 11.50 usec  
 P1 11.50 usec  
 PL1 -1.00 dB  
 SFO1 300.1310650 MHz

----- GRADIENT CHANNEL -----  
 GPNAM1 SINE.100  
 GPNAM2 SINE.100  
 GPZ1 10.00 %  
 GPZ2 10.00 %  
 P16 1000.00 usec

F1 - Acquisition parameters  
 NDO 1  
 TD 128  
 SFO1 300.1311 MHz  
 FIDRES 20.481571 Hz  
 SW 8.722 ppm  
 FxMODE QF

F2 - Processing parameters  
 SI 1024  
 SF 300.1300056 MHz  
 WDW SINE  
 SSB 0  
 LB 0.00 Hz  
 GB 0

**Figure 163: COSY - Spectrum of 12c<sub>1</sub>.**

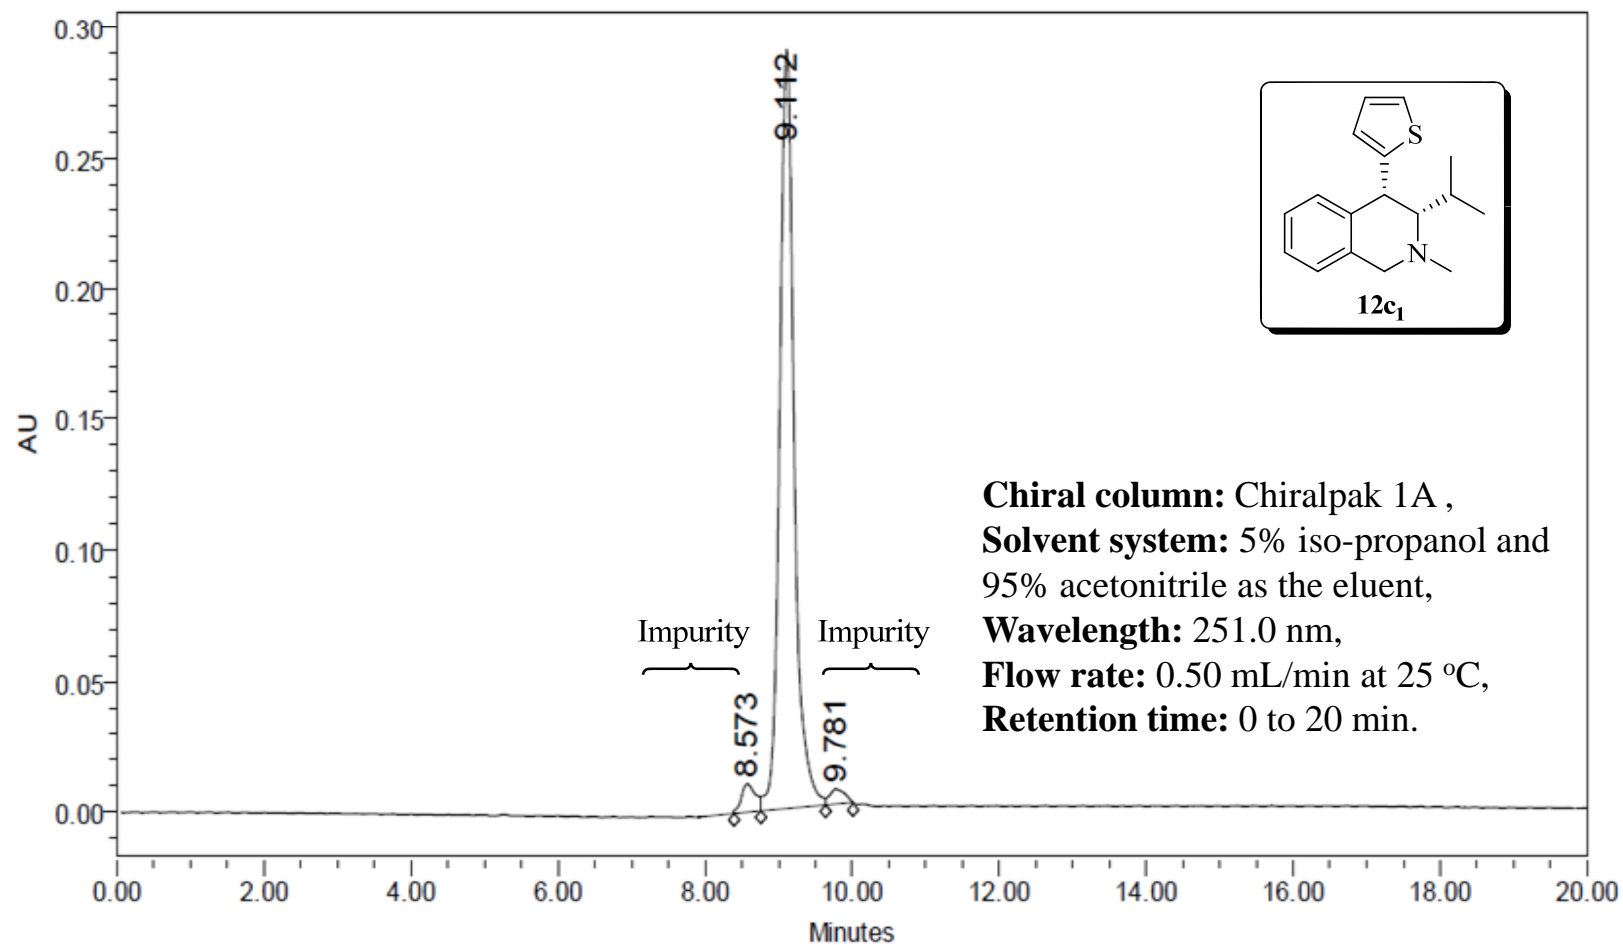

**Note:** The impurity species were collected and found by <sup>1</sup>H NMR not to contain any isomeric forms of compound **12c<sub>1</sub>**.

**Figure 164:** HPLC -Spectrum of **12c<sub>1</sub>**.



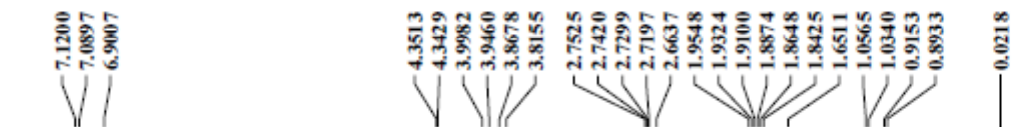

SKM-402B  
1H, CDCl3

Current Data Parameters  
NAME SKM-402B,1H,300 MHz,8.7.12.M  
EXPNO 350  
PROCNO 1

F2 - Acquisition Parameters  
Date\_ 20120709  
Time 11.50  
INSTRUM spect  
PROBHD 5 mm QNP 1H/13  
PULPROG zg30  
TD 65536  
SOLVENT CDCl3  
NS 8  
DS 0  
SWH 6188.119 Hz  
FIDRES 0.094423 Hz  
AQ 5.2952587 sec  
RG 64  
DW 80.800 usec  
DE 6.00 usec  
TE 296.0 K  
D1 1.0000000 sec  
TD0 1

===== CHANNEL f1 =====  
NUC1 1H  
P1 11.80 usec  
PL1 -1.00 dB  
SFO1 300.1318534 MHz

F2 - Processing parameters  
SI 32768  
SF 300.1300087 MHz  
WDW EM  
SSB 0  
LB 0.30 Hz  
GB 0  
PC 1.00

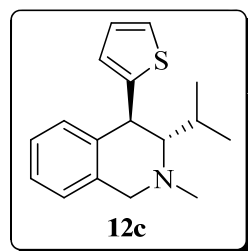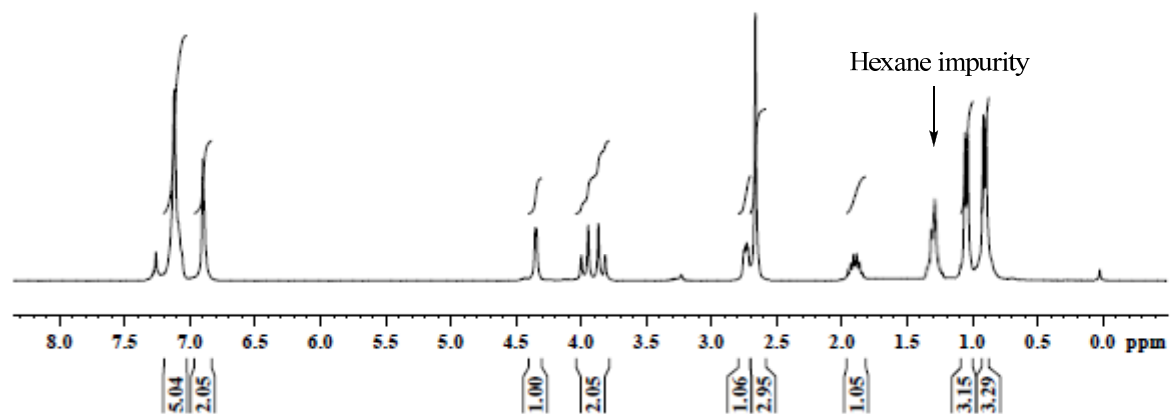

Figure 165: <sup>1</sup>H -NMR Spectrum of 12c.

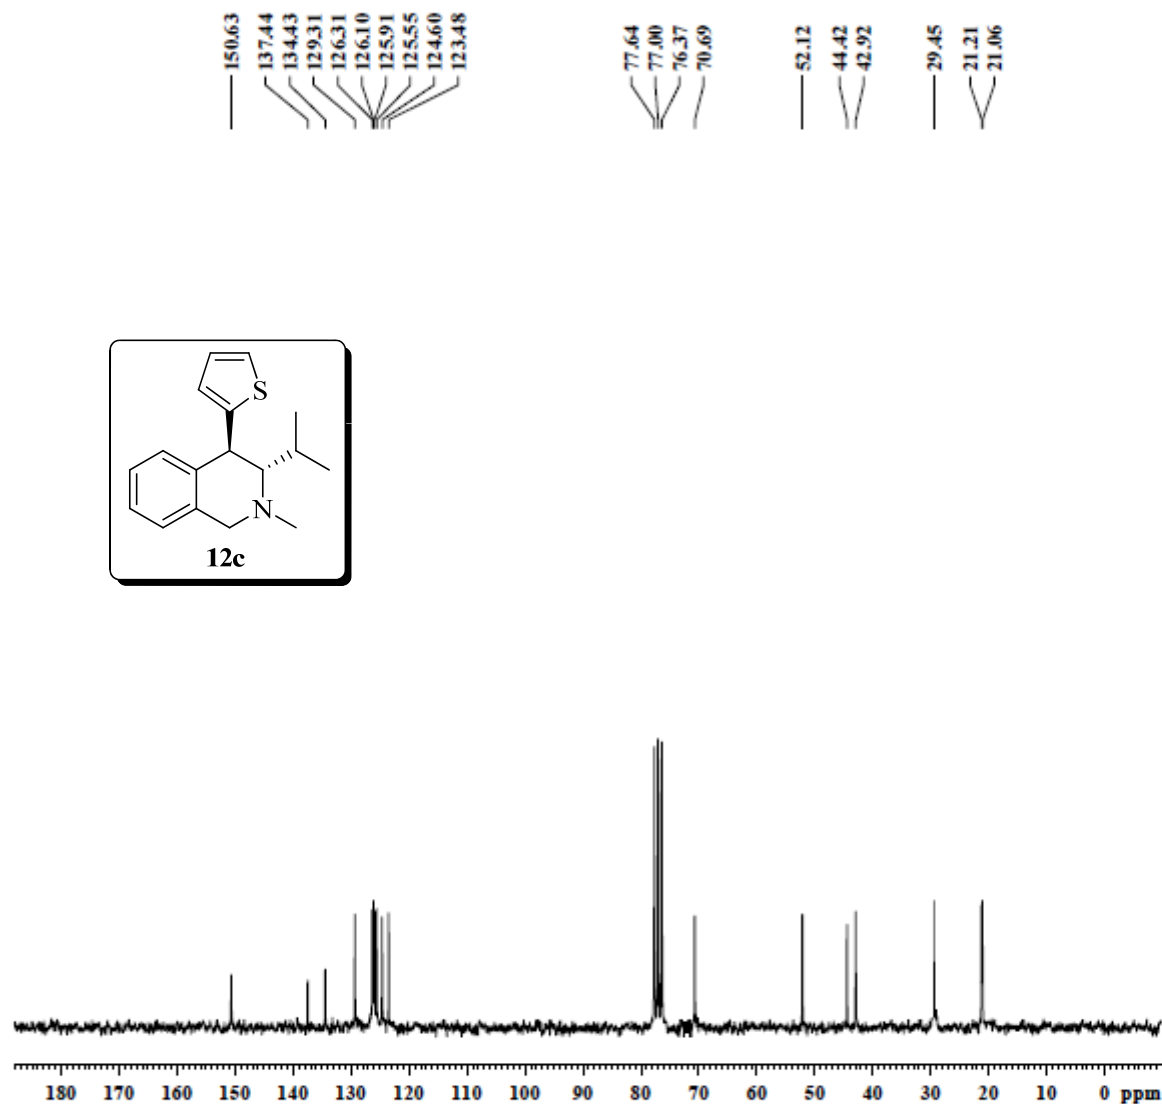

SKM-402B  
13C, CDC13

Current Data Parameters  
NAME SKM-402B,13C,200 MHz,11.7.12.M  
EXPNO 360  
PROCNO 1

F2 - Acquisition Parameters  
Date\_ 20120711  
Time 18.20  
INSTRUM spect  
PROBHD 5 mm Dual 13C/  
PULPROG zgpg30  
TD 65536  
SOLVENT CDC13  
NS 512  
DS 4  
SWH 11990.407 Hz  
FIDRES 0.182058 Hz  
AQ 2.7329011 sec  
RG 57  
DW 41.700 usec  
DE 8.00 usec  
TE 0.0 K  
D1 2.0000000 sec  
d11 0.0300000 sec  
DELTA 1.89999998 sec  
MCREST 0.0000000 sec  
MCWRK 0.0150000 sec

----- CHANNEL f1 -----  
NUC1 13C  
P1 6.30 usec  
PL1 -8.00 dB  
SFO1 50.3277608 MHz

----- CHANNEL f2 -----  
CPDPRG2 waltz16  
NUC2 1H  
PCPD2 100.00 usec  
PL2 -4.00 dB  
PL12 19.00 dB  
PL13 22.00 dB  
SFO2 200.1308005 MHz

F2 - Processing parameters  
SI 32768  
SF 50.3227306 MHz  
WDW EM  
SSB 0  
LB 3.00 Hz  
GB 0  
PC 1.40

Figure 166:  $^{13}\text{C}$  -NMR Spectrum of **12c**.

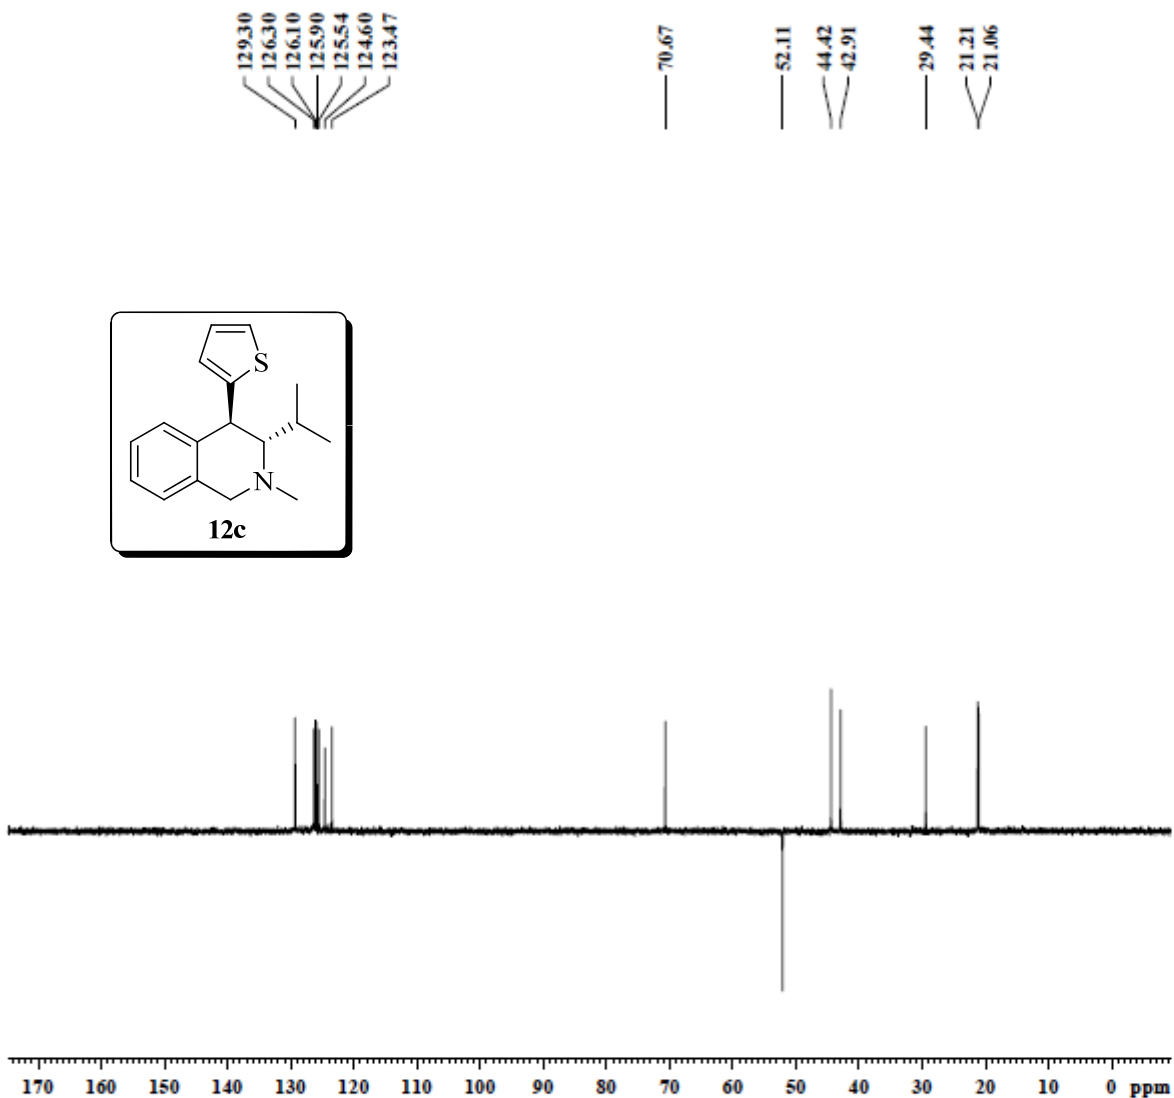

SKM-402B  
DEPT-I, CDCI3

Current Data Parameters  
NAME SKM-402B\_DEPT-I,300 MHz,12.7.12.E  
EXPNO 1200  
PROCNO 1

F2 - Acquisition Parameters  
Date\_ 20120713  
Time 11.57  
INSTRUM spect  
PROBHD 5 mm QNP 1H/13  
PULPROG dept135  
TD 65536  
SOLVENT CDCI3  
NS 256  
DS 4  
SWH 18028.846 Hz  
FIDRES 0.275098 Hz  
AQ 1.8175818 sec  
RG 2050  
DW 27.733 usec  
DE 6.00 usec  
TE 297.3 K  
CNST2 145.0000000  
D1 2.0000000 sec  
d2 0.0034828 sec  
d12 0.0000200 sec  
DELTA 0.00001108 sec  
TD0 1

===== CHANNEL f1 =====  
NUC1 13C  
P1 8.70 usec  
p2 17.40 usec  
PL1 -3.00 dB  
SFO1 75.4752953 MHz

===== CHANNEL f2 =====  
CPDPRG2 waltz16  
NUC2 1H  
P3 11.60 usec  
p4 23.20 usec  
PCPD2 80.00 usec  
PL2 -1.00 dB  
PL12 17.00 dB  
SFO2 300.1312005 MHz

F2 - Processing parameters  
SI 32768  
SF 75.467533 MHz  
WDW EM  
SSB 0  
LB 1.00 Hz  
GB 0  
PC 1.40

Figure 167: DEPT-I -Spectrum of 12c.

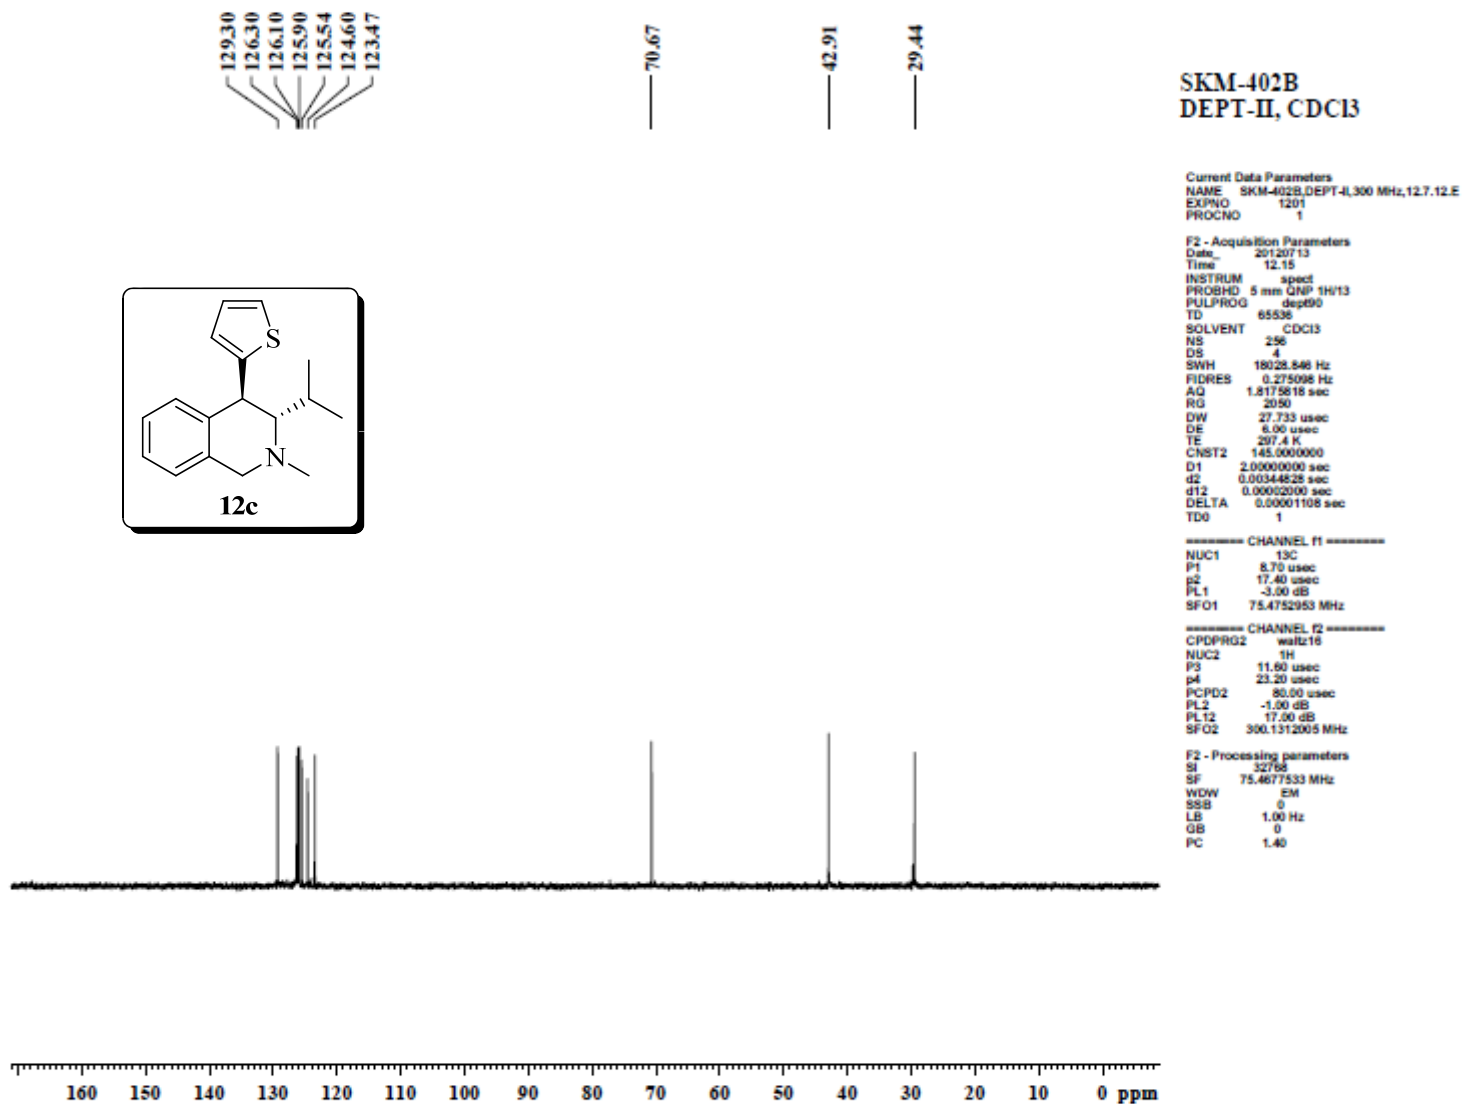

Figure 168: DEPT-II -Spectrum of 12c.

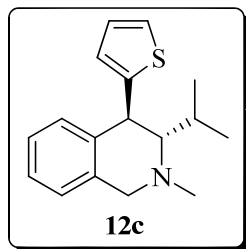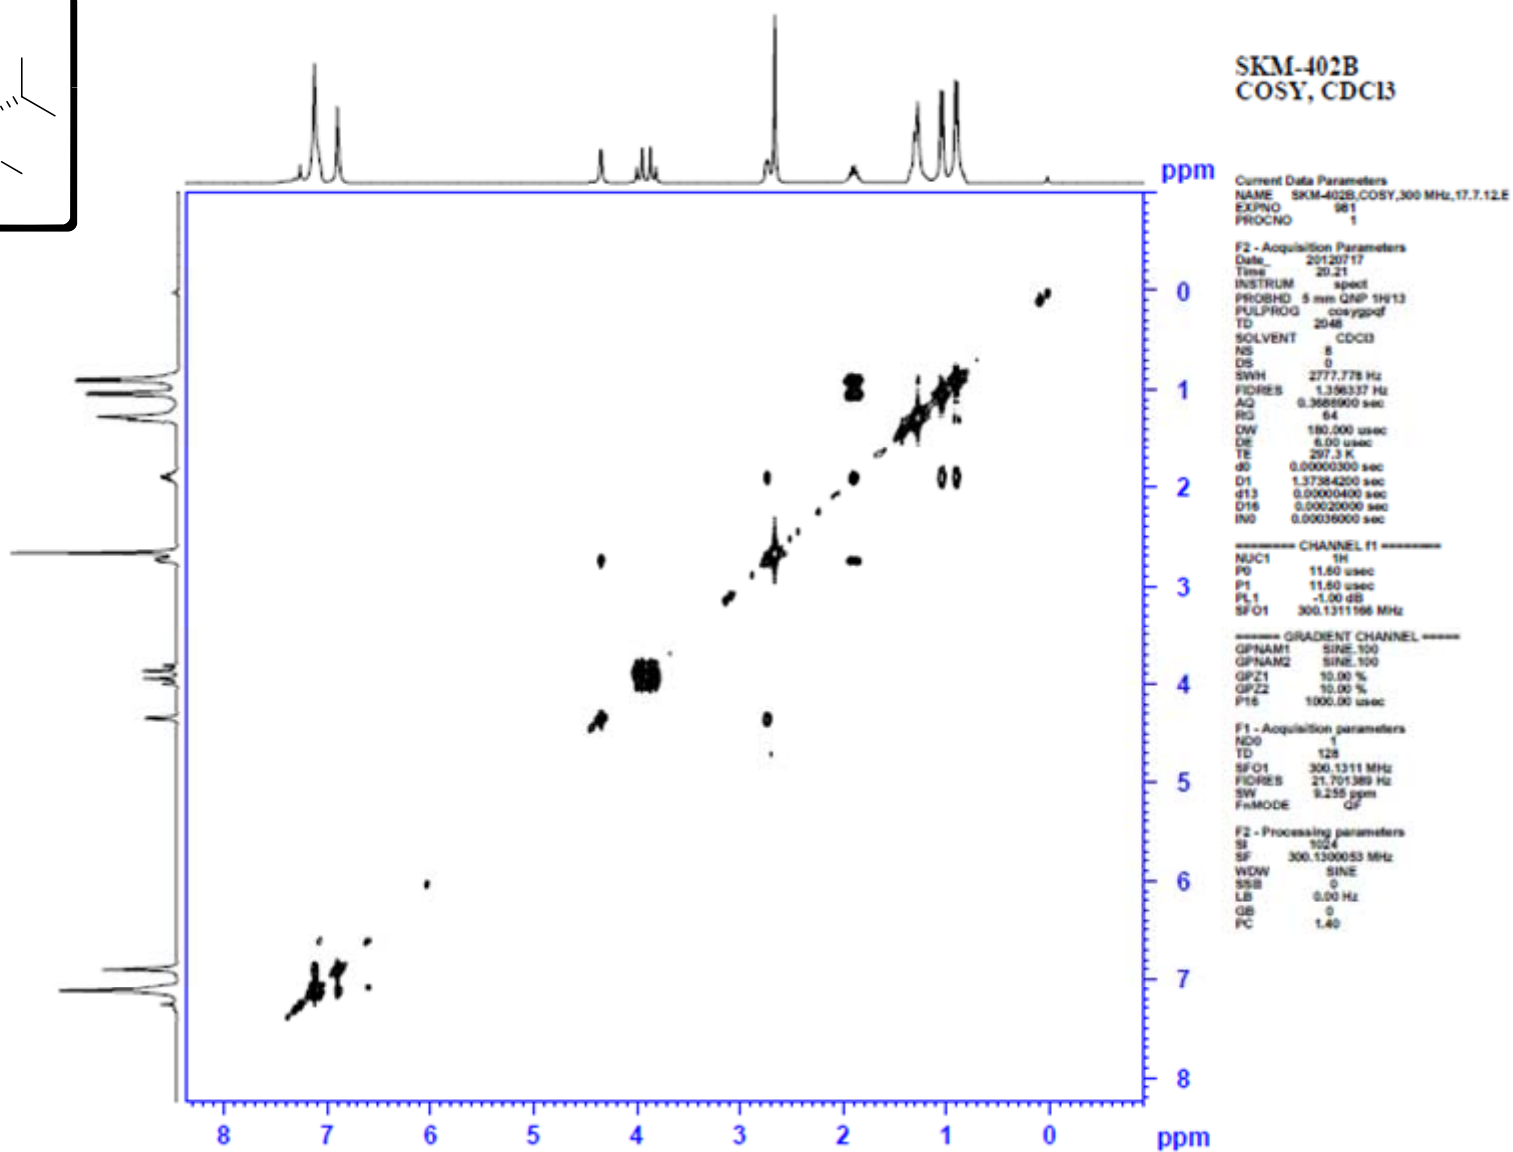

**Figure 169: COSY -Spectrum of 12c.**

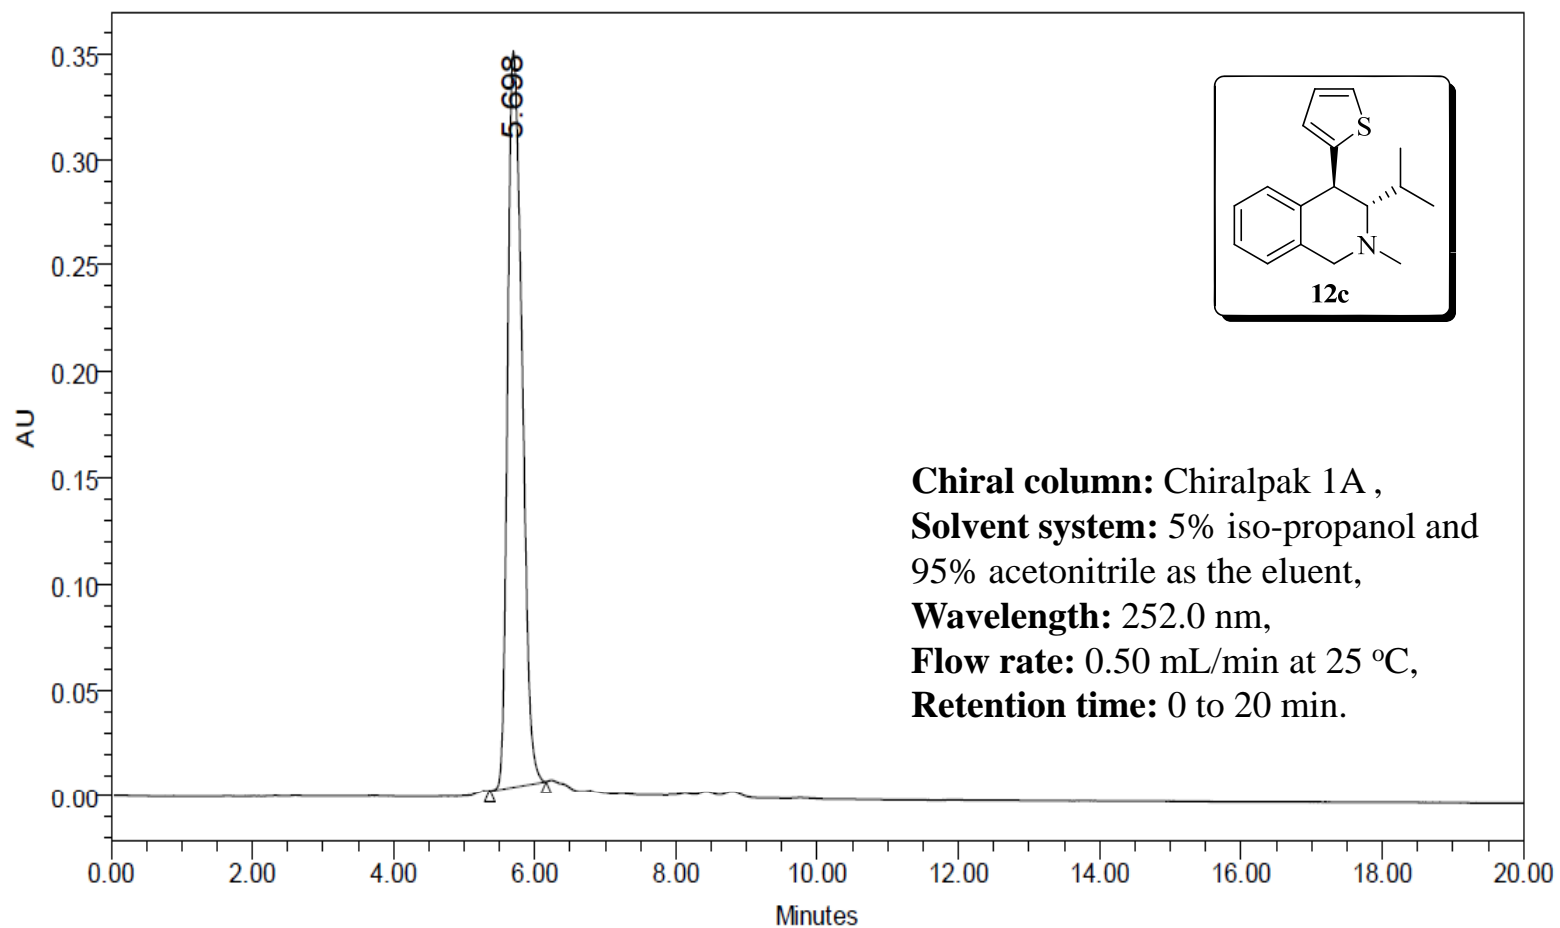

**Figure 170:** HPLC -Spectrum of **12c**.

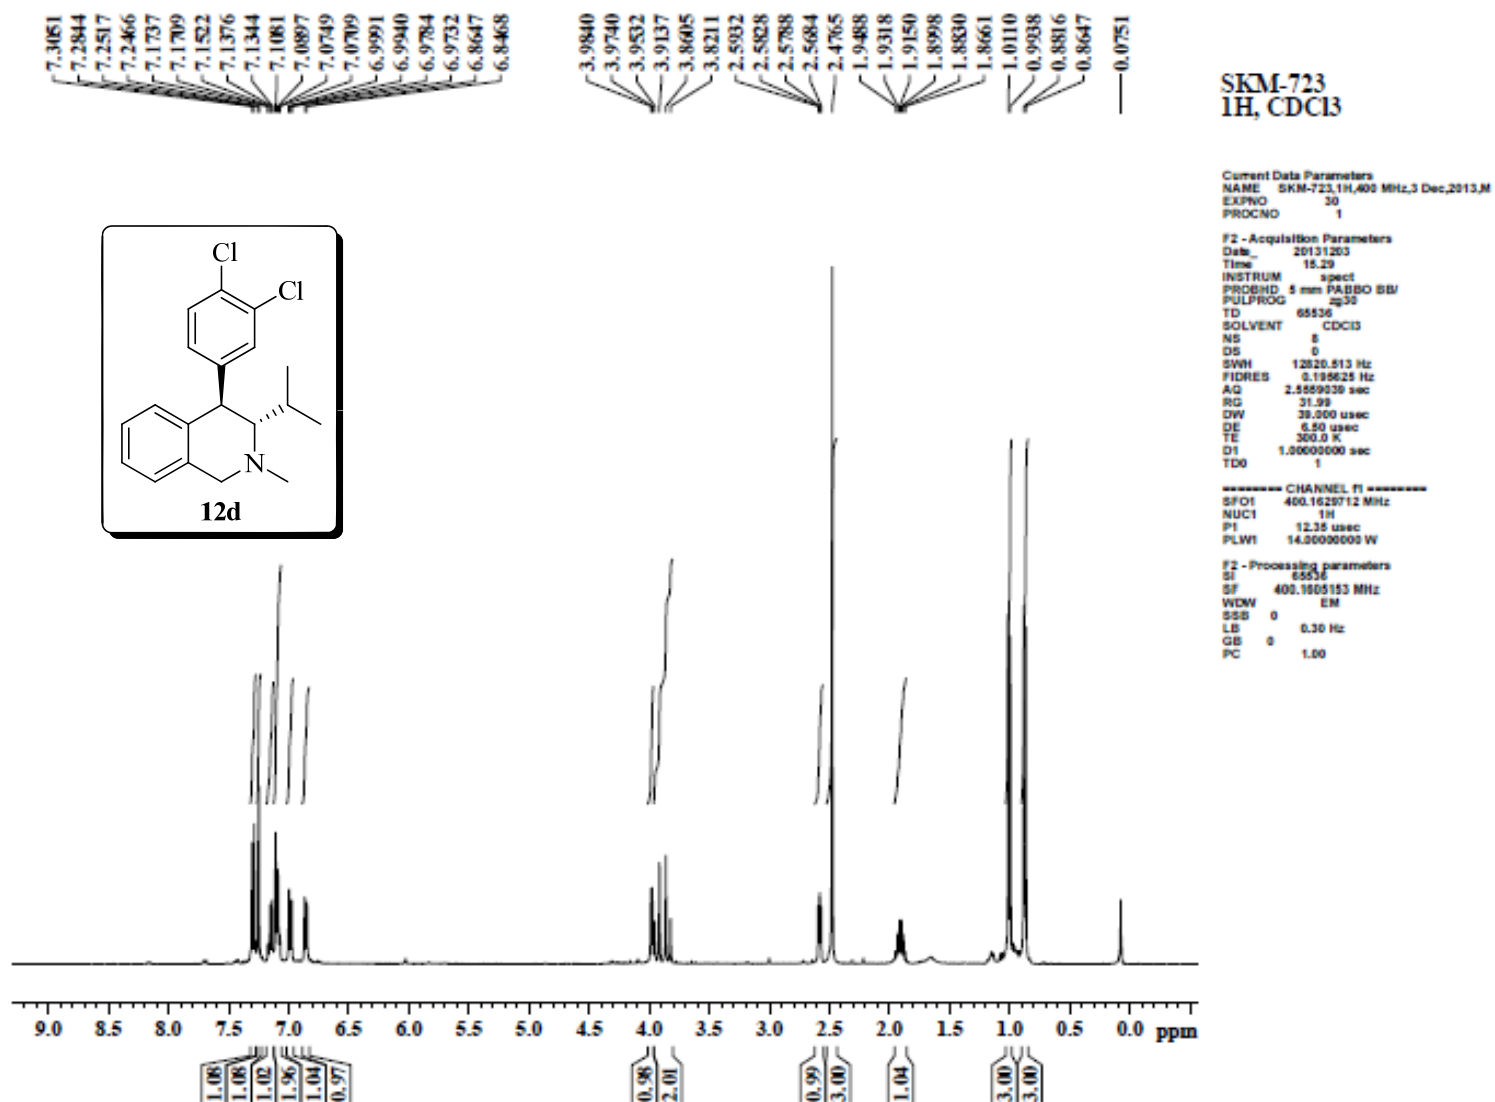

**Figure 171: <sup>1</sup>H -NMR Spectrum of 12d.**

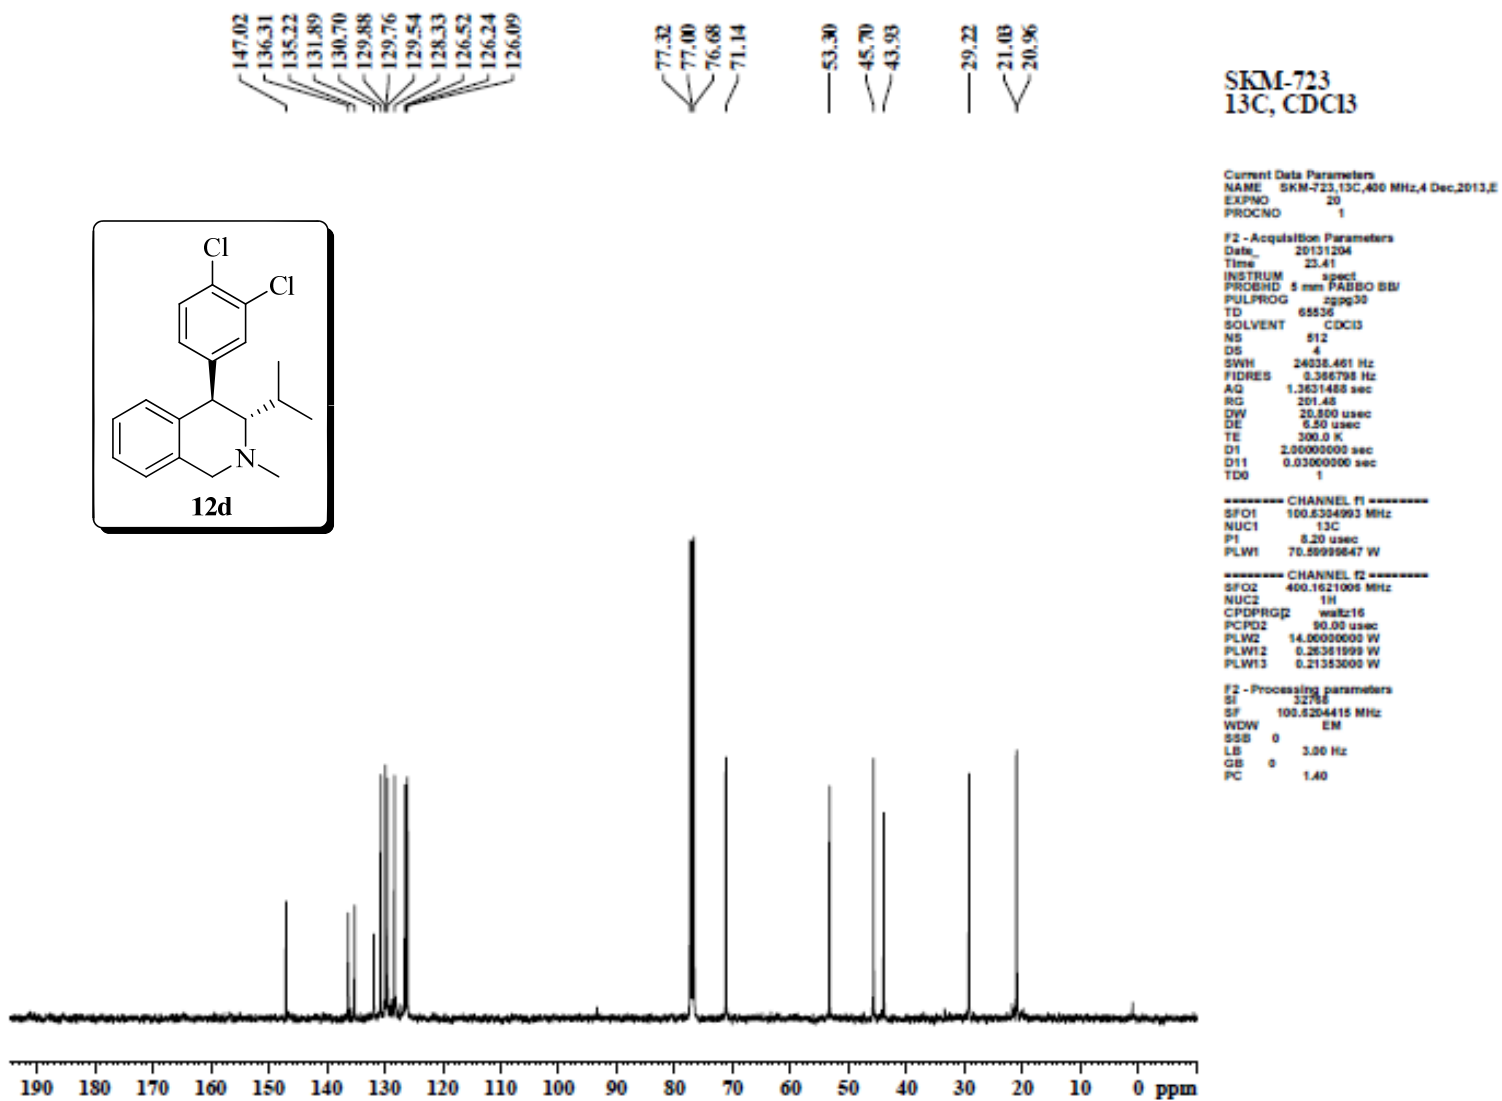

**Figure 172:**  $^{13}\text{C}$  -NMR Spectrum of **12d**.



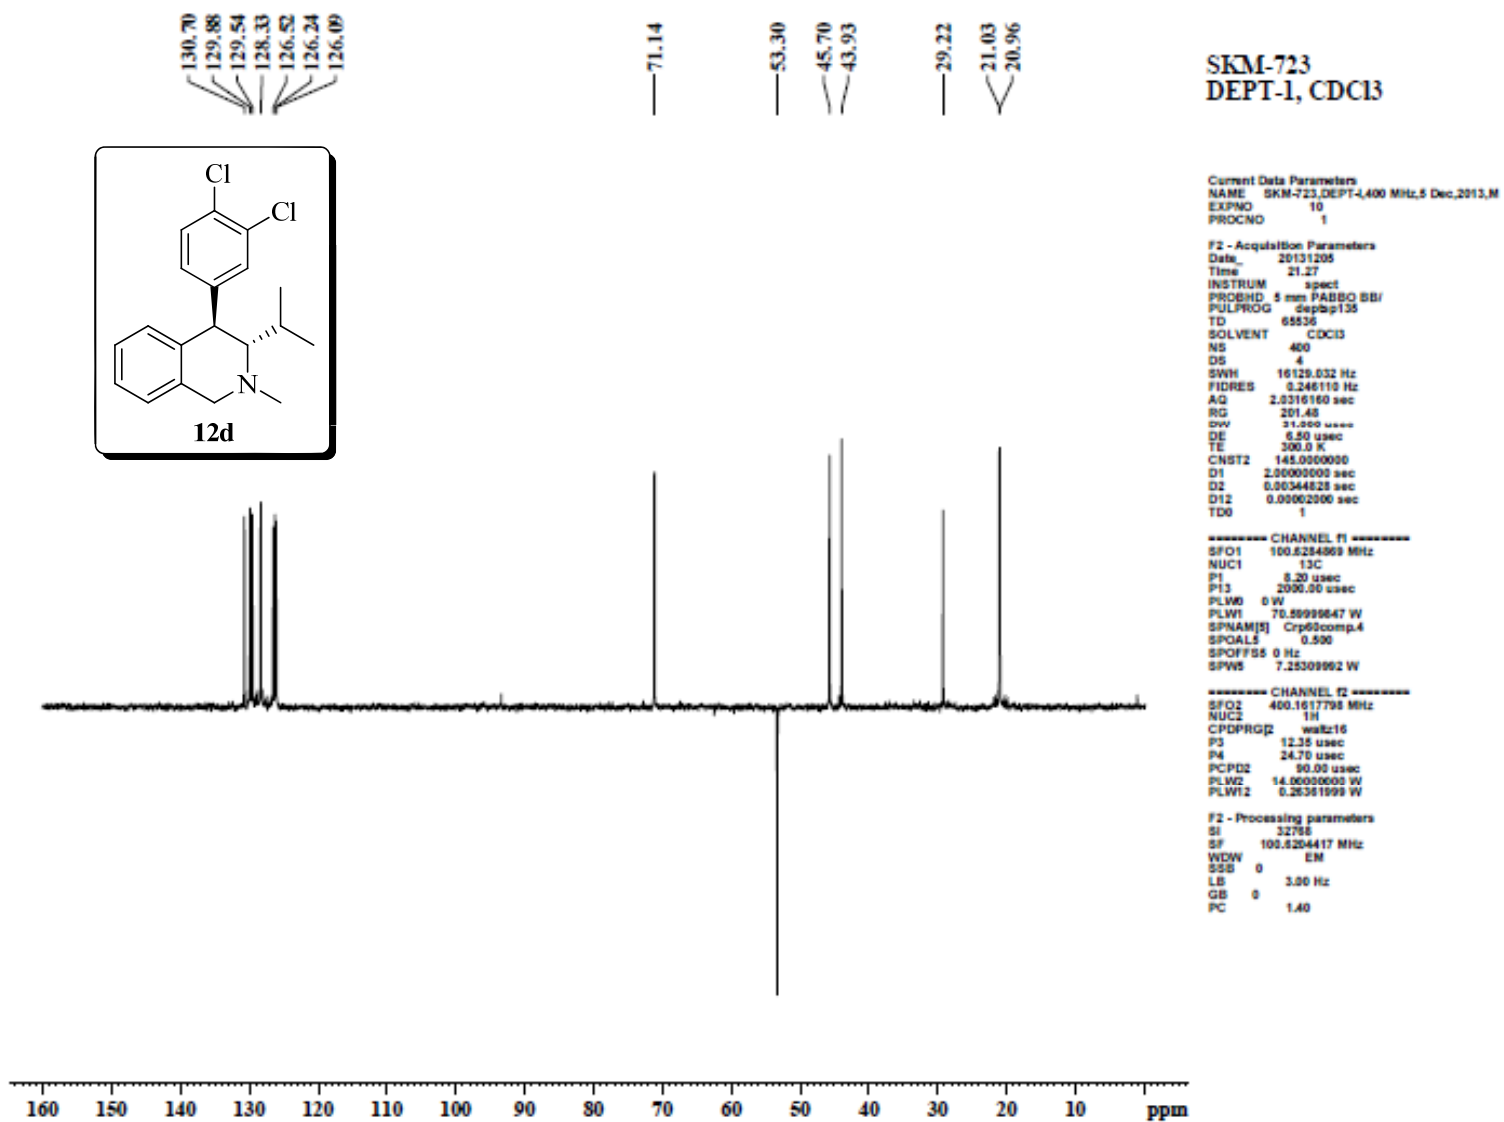

Figure 173: DEPT-I -Spectrum of 12d.

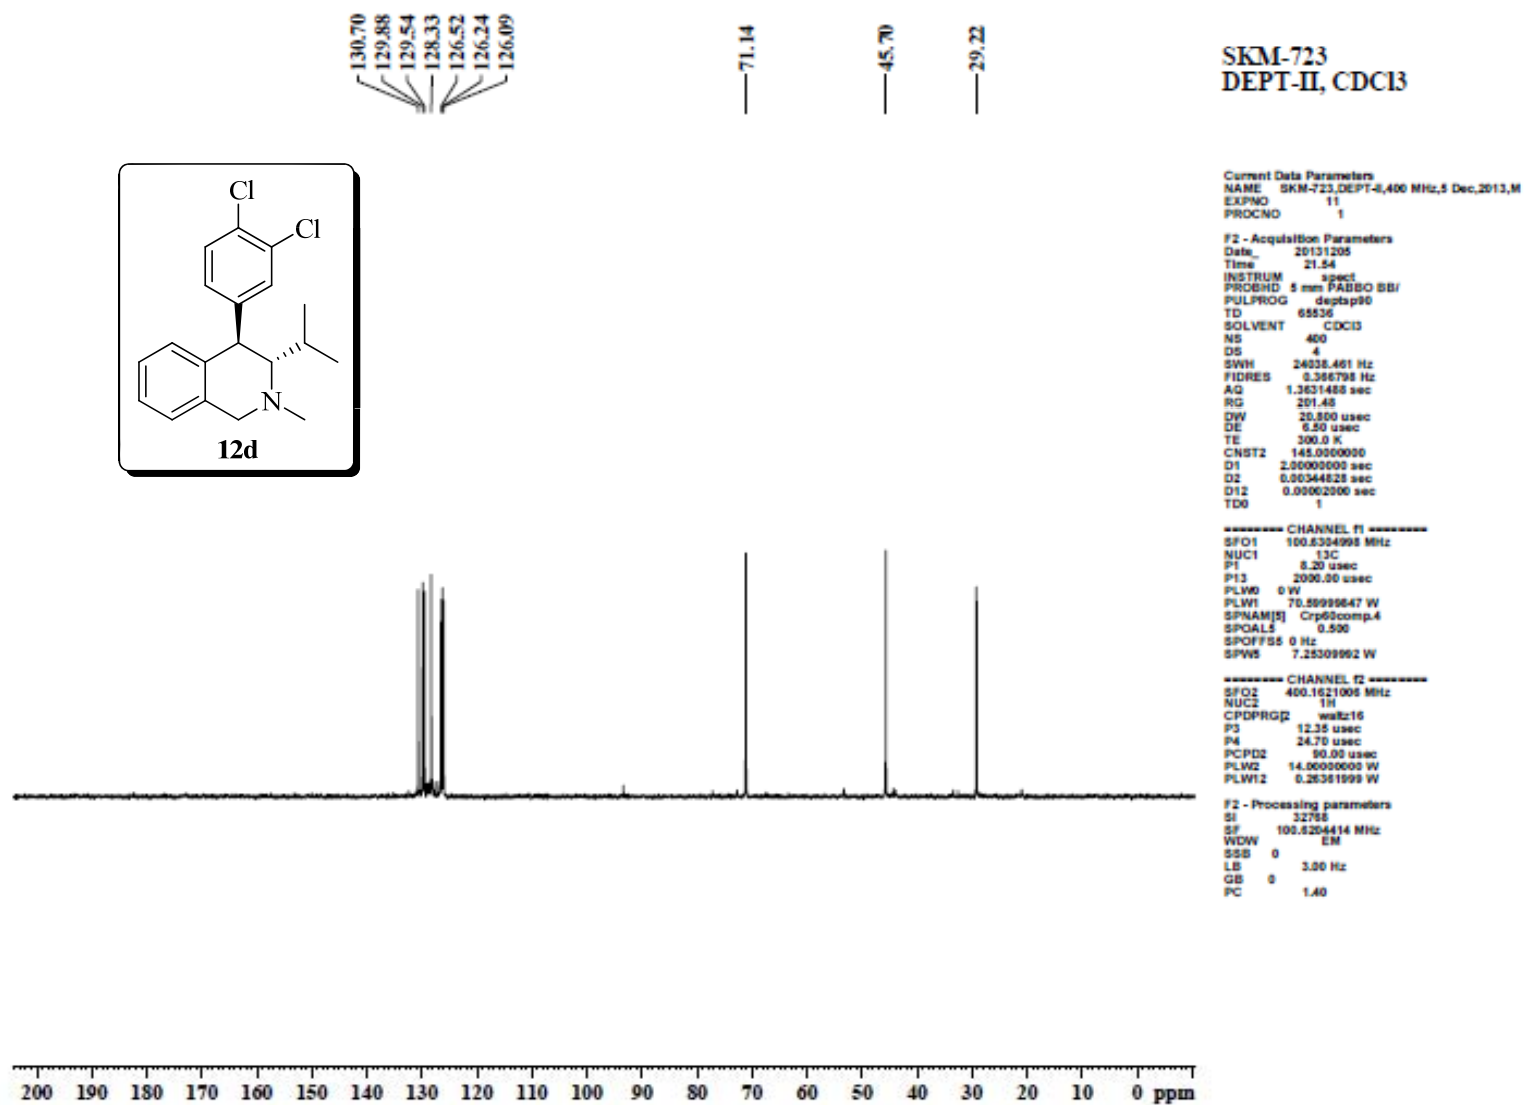

**Figure 174: DEPT-II -Spectrum of 12d.**

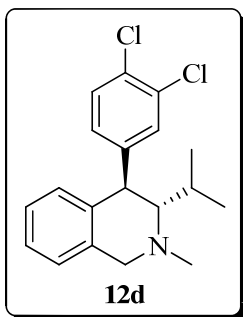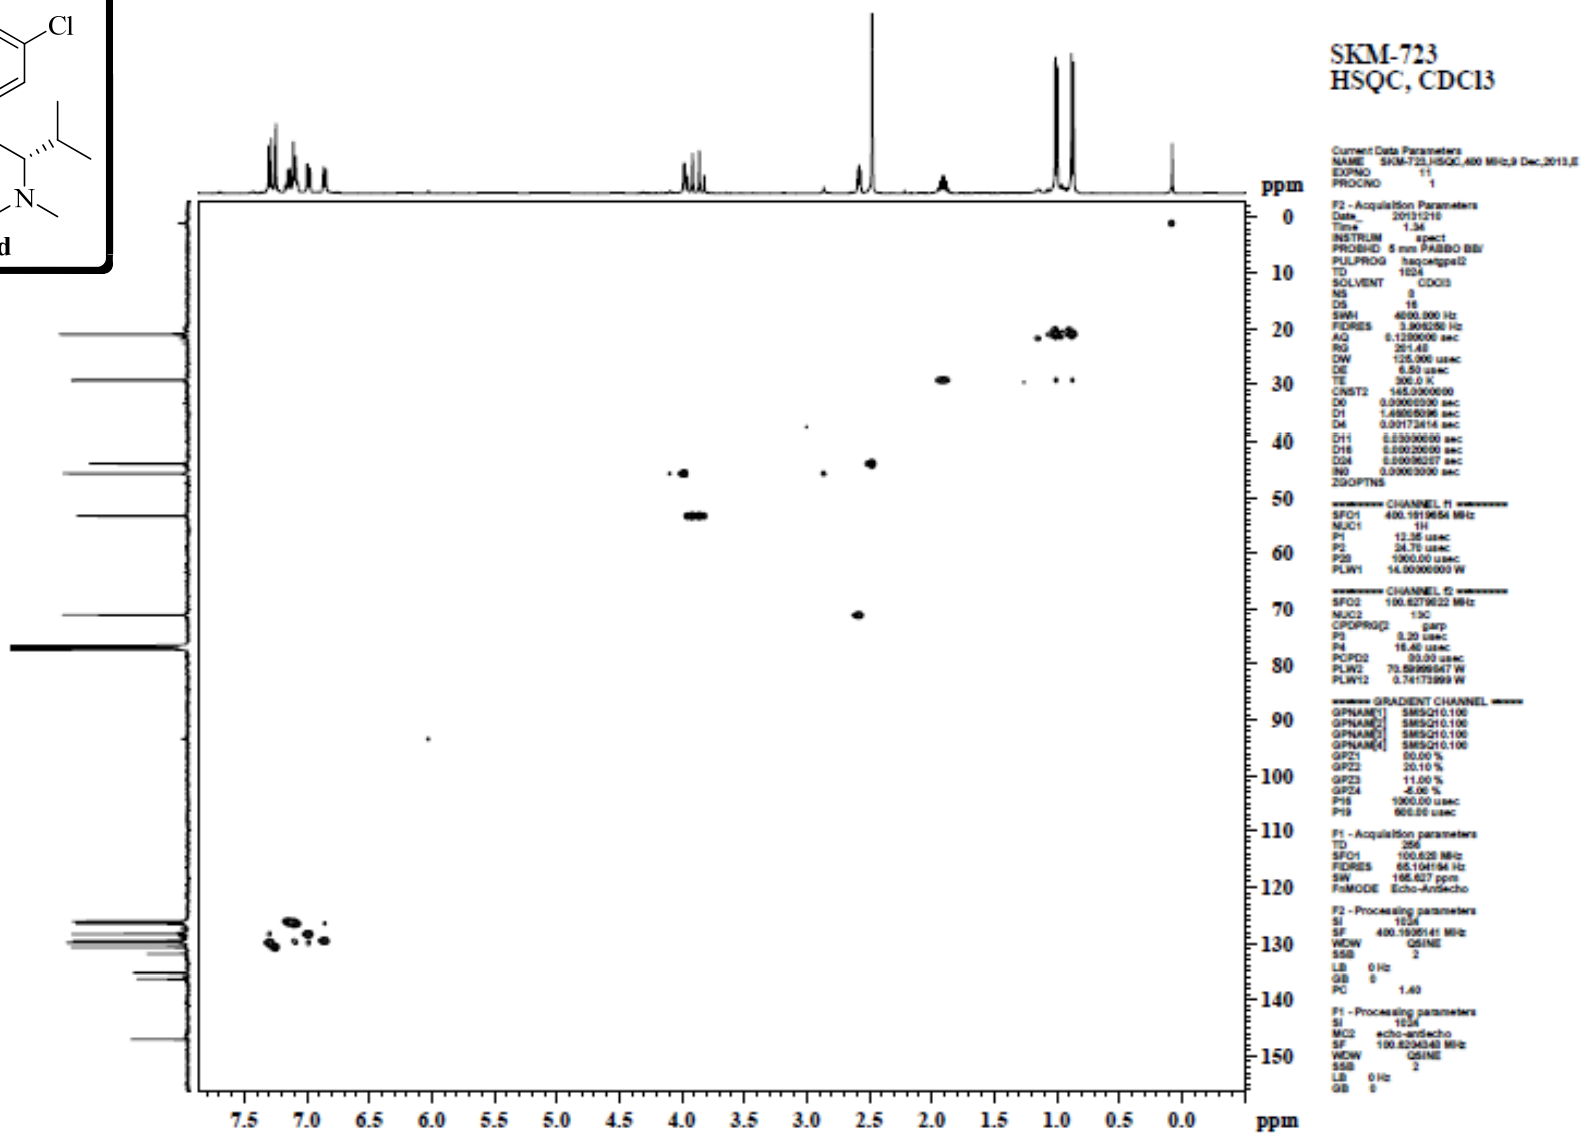

**Figure 175: HSQC -Spectrum of 12d.**

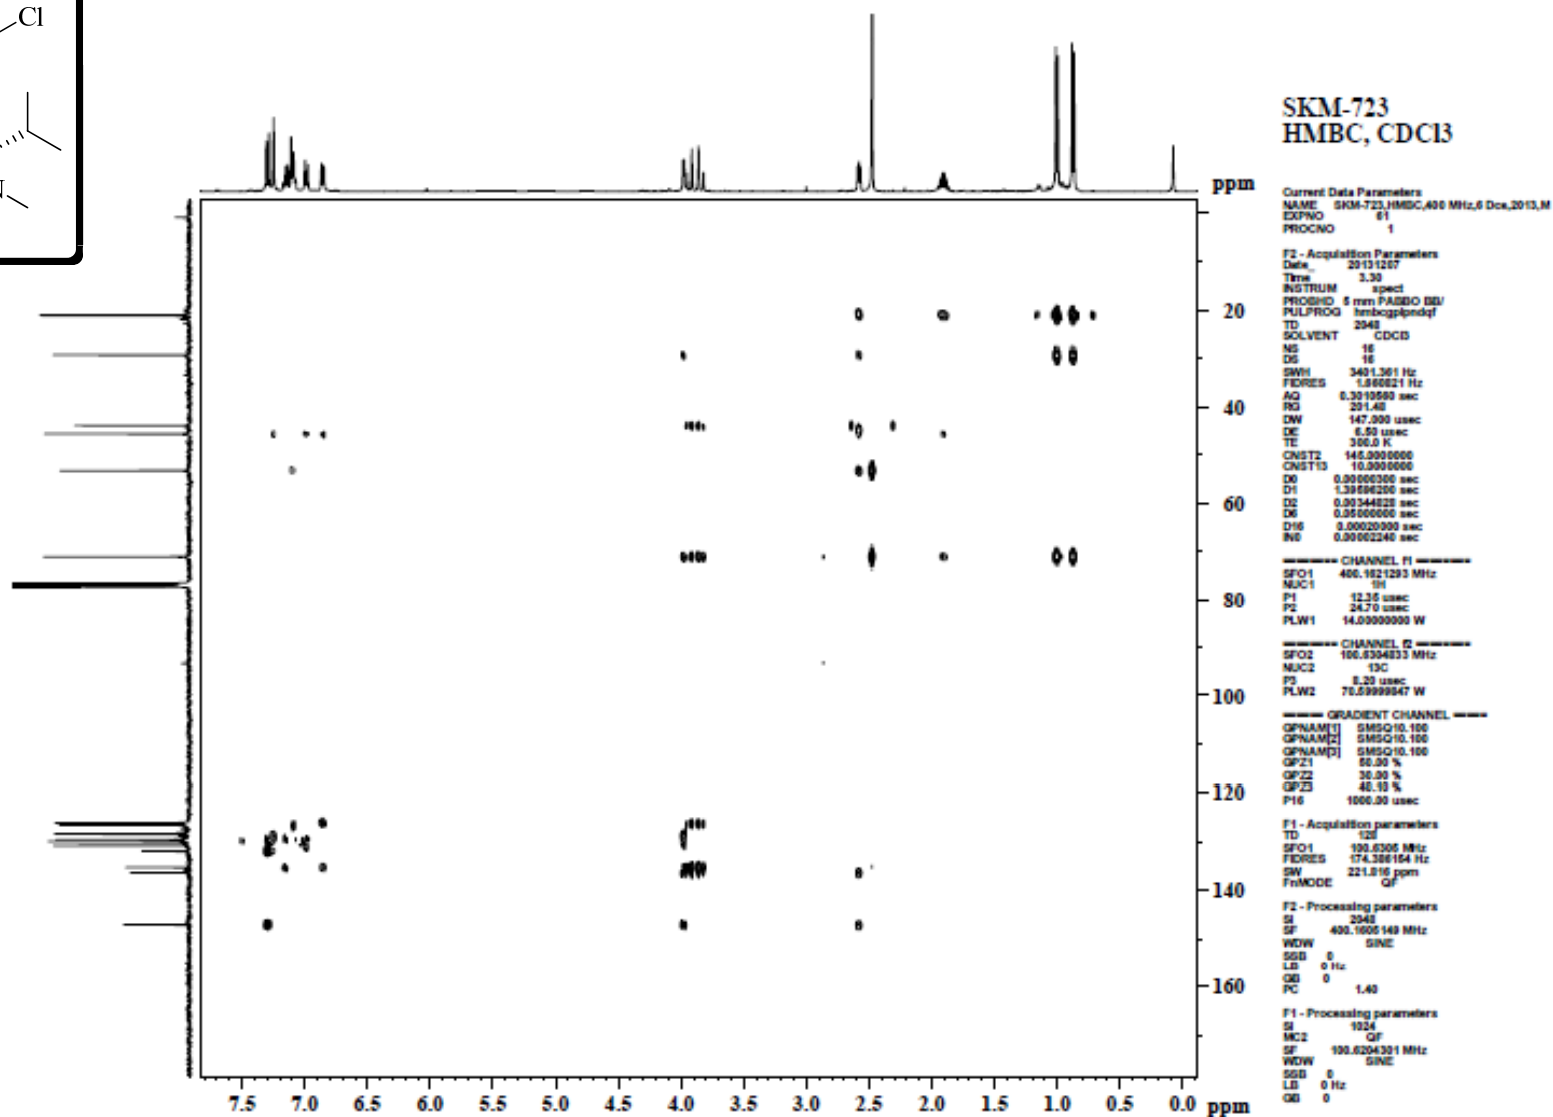

**Figure 176: HMBC -Spectrum of 12d.**

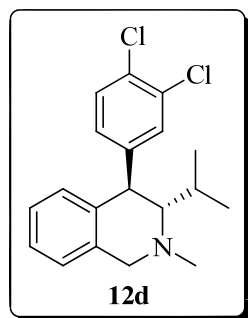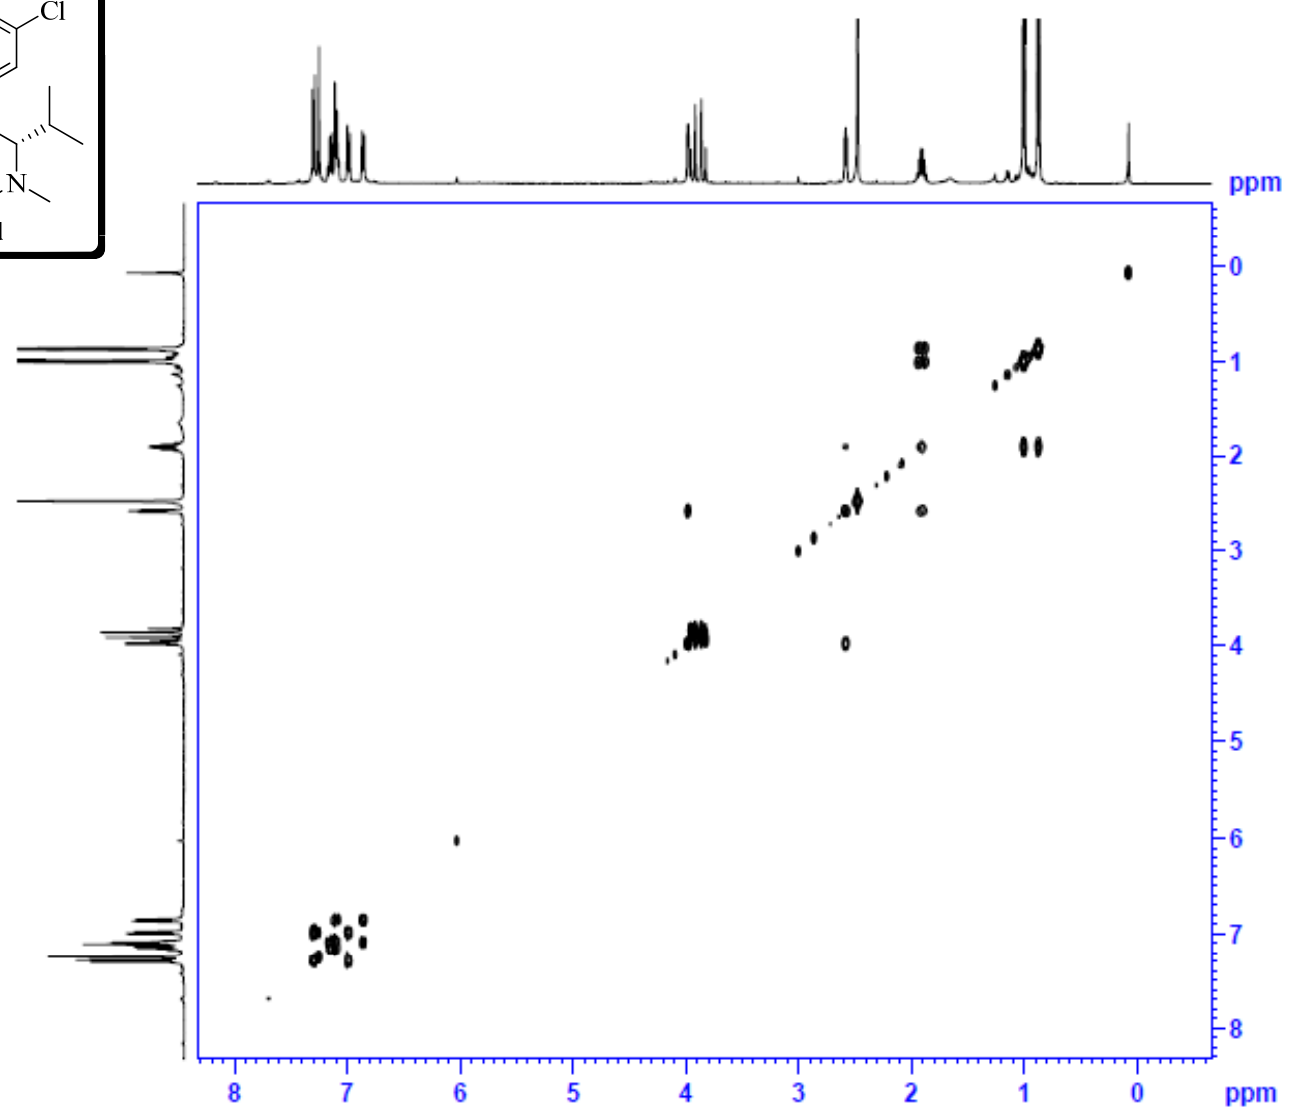

SKM-723  
COSY, CDC13

Current Data Parameters  
 NAME SKM-723.COSY,400 MHz,5 Dec,2013,M  
 EXPNO 13  
 PROCNO 1

F2 - Acquisition Parameters  
 Date\_ 20131208  
 Time 21.57  
 INSTRUM spect  
 PROBHD 5 mm FASBO BB/  
 PULPROG cosygpppqf  
 TD 2048  
 SOLVENT CDC13  
 NS 4  
 DS 8  
 SWH 3897.122 Hz  
 FIDRES 1.756407 Hz  
 AQ 0.2546720 sec  
 RG 25.1  
 DW 138.000 usec  
 DE 6.50 usec  
 TE 300.0 K  
 D0 0.0000300 sec  
 D1 1.20702105 sec  
 D11 0.03000000 sec  
 D12 0.00002000 sec  
 D13 0.00004000 sec  
 D16 0.00020000 sec  
 INO 0.00027800 sec

===== CHANNEL f1 =====  
 SFO1 400.1620483 MHz  
 NUC1 1H  
 P0 12.38 usec  
 P1 12.38 usec  
 P17 2500.00 usec  
 PLW1 14.00000000 W  
 PLW10 3.15879869 W

===== GRADIENT CHANNEL =====  
 GPNAM[1] SMSQ15,100  
 GPZ1 10.00 %  
 P16 1000.00 usec

F1 - Acquisition parameters  
 TD 128  
 SFO1 400.162 MHz  
 FIDRES 28.102518 Hz  
 SW 8.989 ppm  
 FhMODE QF

F2 - Processing parameters  
 SI 1024  
 SF 400.1605134 MHz  
 WDW QSINE  
 SSB 0  
 LB 0 Hz  
 GB 0  
 PC 1.40

F1 - Processing parameters  
 SI 1024  
 MCZ QF  
 SF 400.1605144 MHz  
 WDW QSINE  
 SSB 0  
 LB 0 Hz  
 GB 0

Figure 177: COSY -Spectrum of 12d.

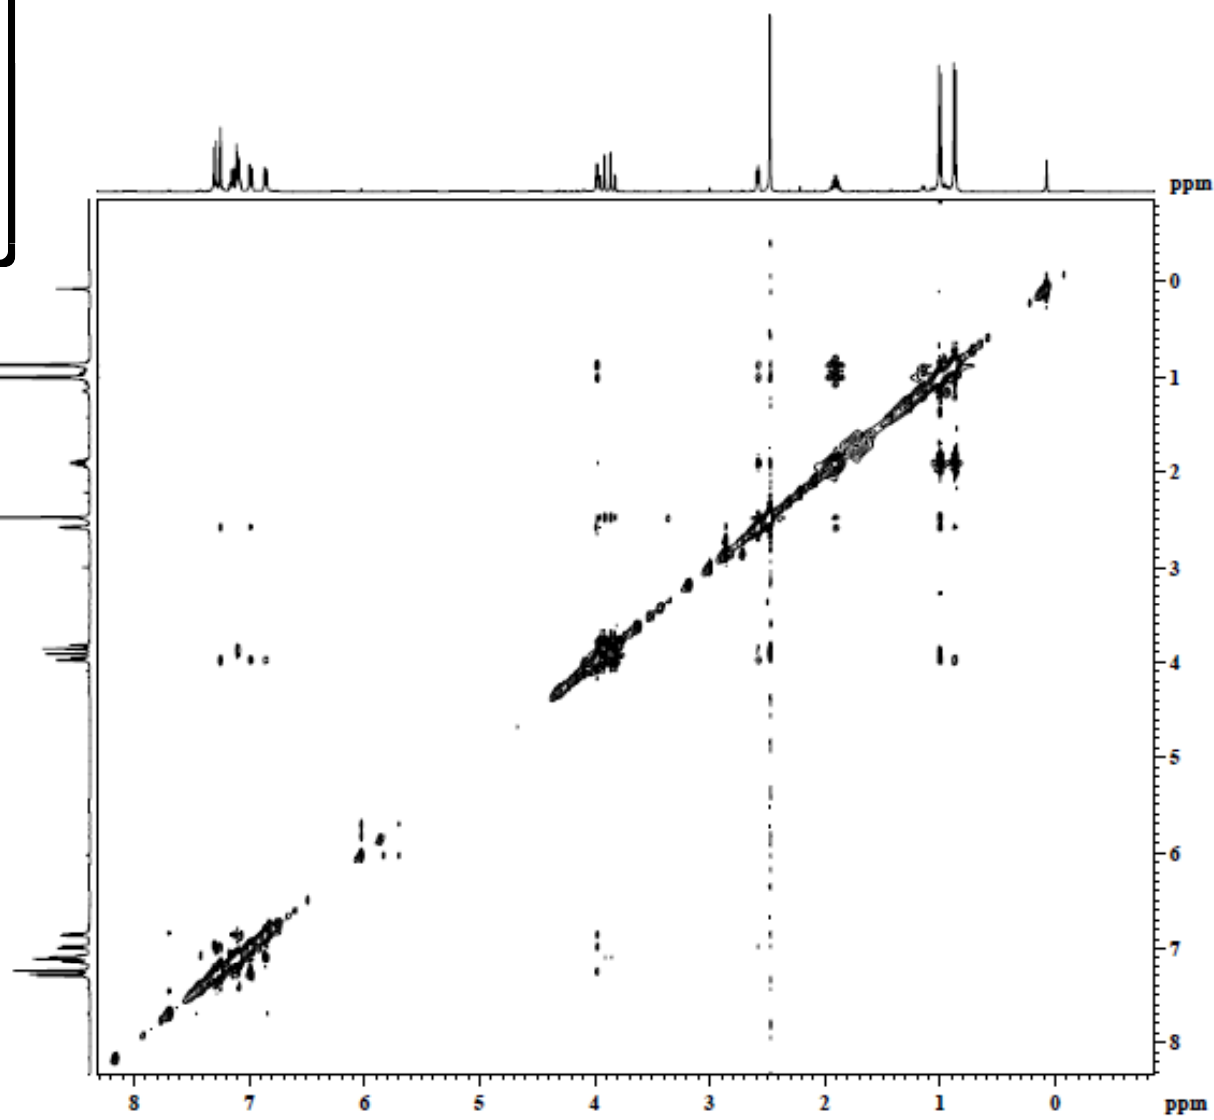

**SKM-723  
NOESY, CDCl<sub>3</sub>**

Current Data Parameters  
 NAME SKM-723\_NOESY\_400 MHz\_10 Dec, 2013.M  
 EXPNO 31  
 PROCNO 1

F2 - Acquisition Parameters  
 Date\_ 20131211  
 Time 18:12  
 INSTRUM spect  
 PROBHD 5 mm PABBO BB/  
 PULPROG zgpg30pp  
 TD 2648  
 SOLVENT CDCl<sub>3</sub>  
 NS 16  
 DS 32  
 SWH 3676.471 Hz  
 FIDRES 1.786182 Hz  
 AQ 0.2788256 sec  
 RG 22.13  
 DW 136.000 usec  
 DE 9.50 usec  
 TE 300.2 K  
 D0 0.00012020 sec  
 D1 1.07747195 sec  
 D8 0.30000001 sec  
 D11 0.00000000 sec  
 D12 0.00002000 sec  
 D16 0.00020000 sec  
 IN0 0.00027200 sec

===== CHANNEL f1 =====  
 SFO1 400.582090 MHz  
 MUC1 1H  
 P1 13.36 usec  
 P2 24.70 usec  
 P17 2500.00 usec  
 PLW1 14.0000000 W  
 PLW10 3.35079693 W

===== GRADIENT CHANNEL =====  
 GPNAM[1] SMSQ10.100  
 GPZ1 40.00 %  
 P16 1000.00 usec

F1 - Acquisition parameters  
 TD 256  
 SFO1 400.142 MHz  
 FIDRES 14.381214 Hz  
 SW 9.187 ppm  
 FMODE States-TPPI

F2 - Processing parameters  
 SI 1634  
 SF 400.1505150 MHz  
 WDW Cosine  
 SSB 2  
 LB 0 Hz  
 GB 0  
 PC 1.00

F1 - Processing parameters  
 SI 1634  
 MCF2 States-TPPI  
 SF 400.1505151 MHz  
 WDW Cosine  
 SSB 2  
 LB 0 Hz  
 GB 0

**Figure 178: NOESY -Spectrum of 12d.**

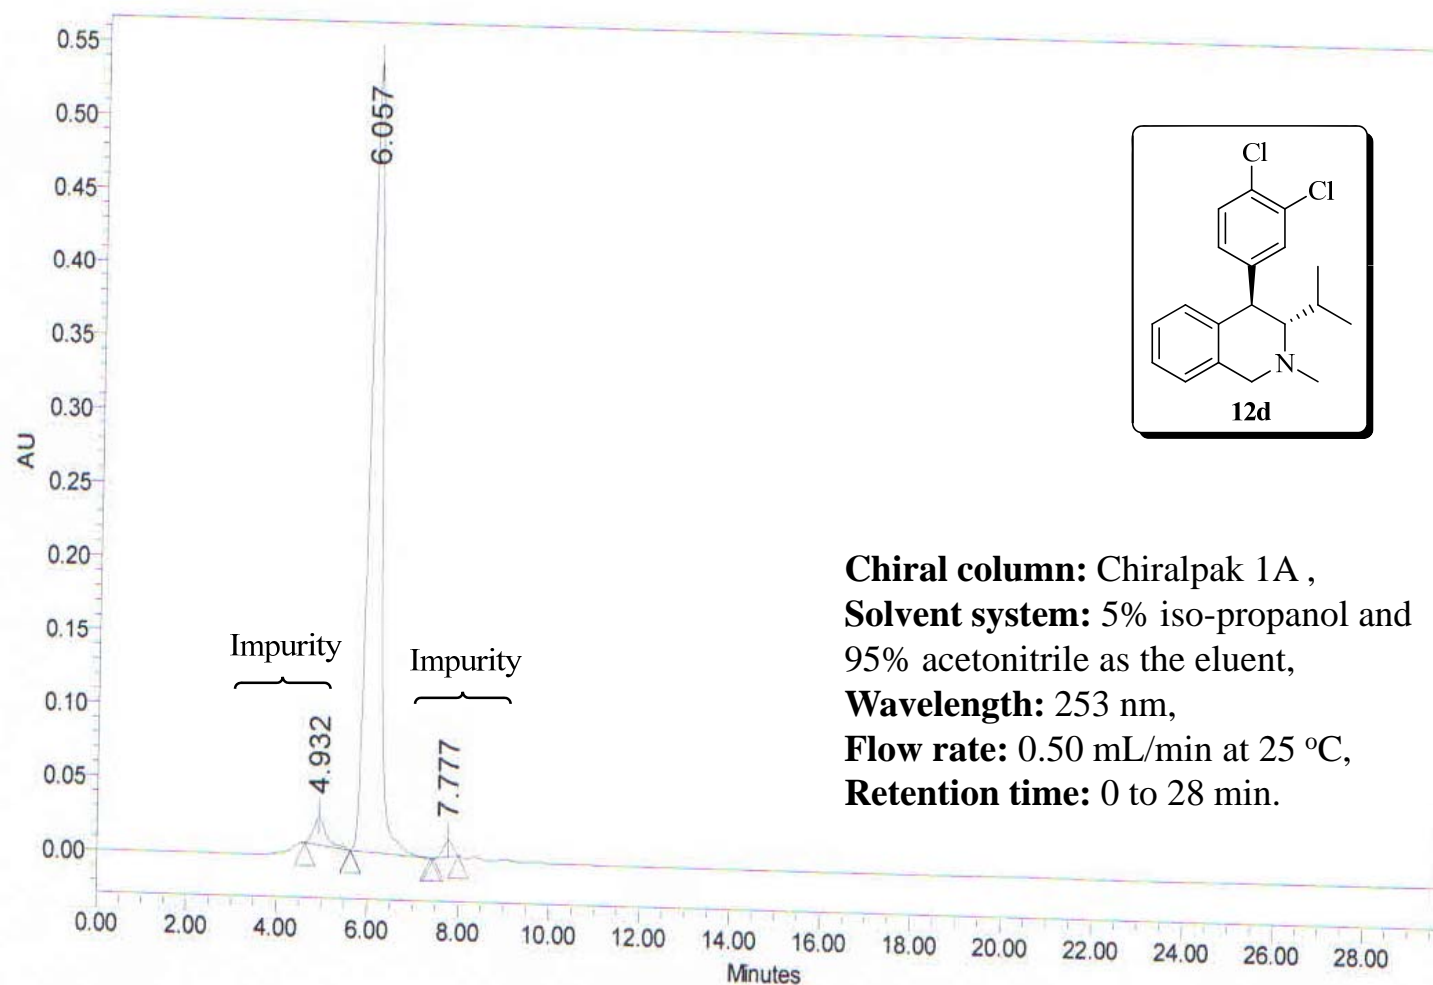

**Note:** The impurity species were collected and found by  $^1\text{H}$  NMR not to contain any isomeric forms of compound **12d**.

**Figure 179:** HPLC -Spectrum of **12d**.

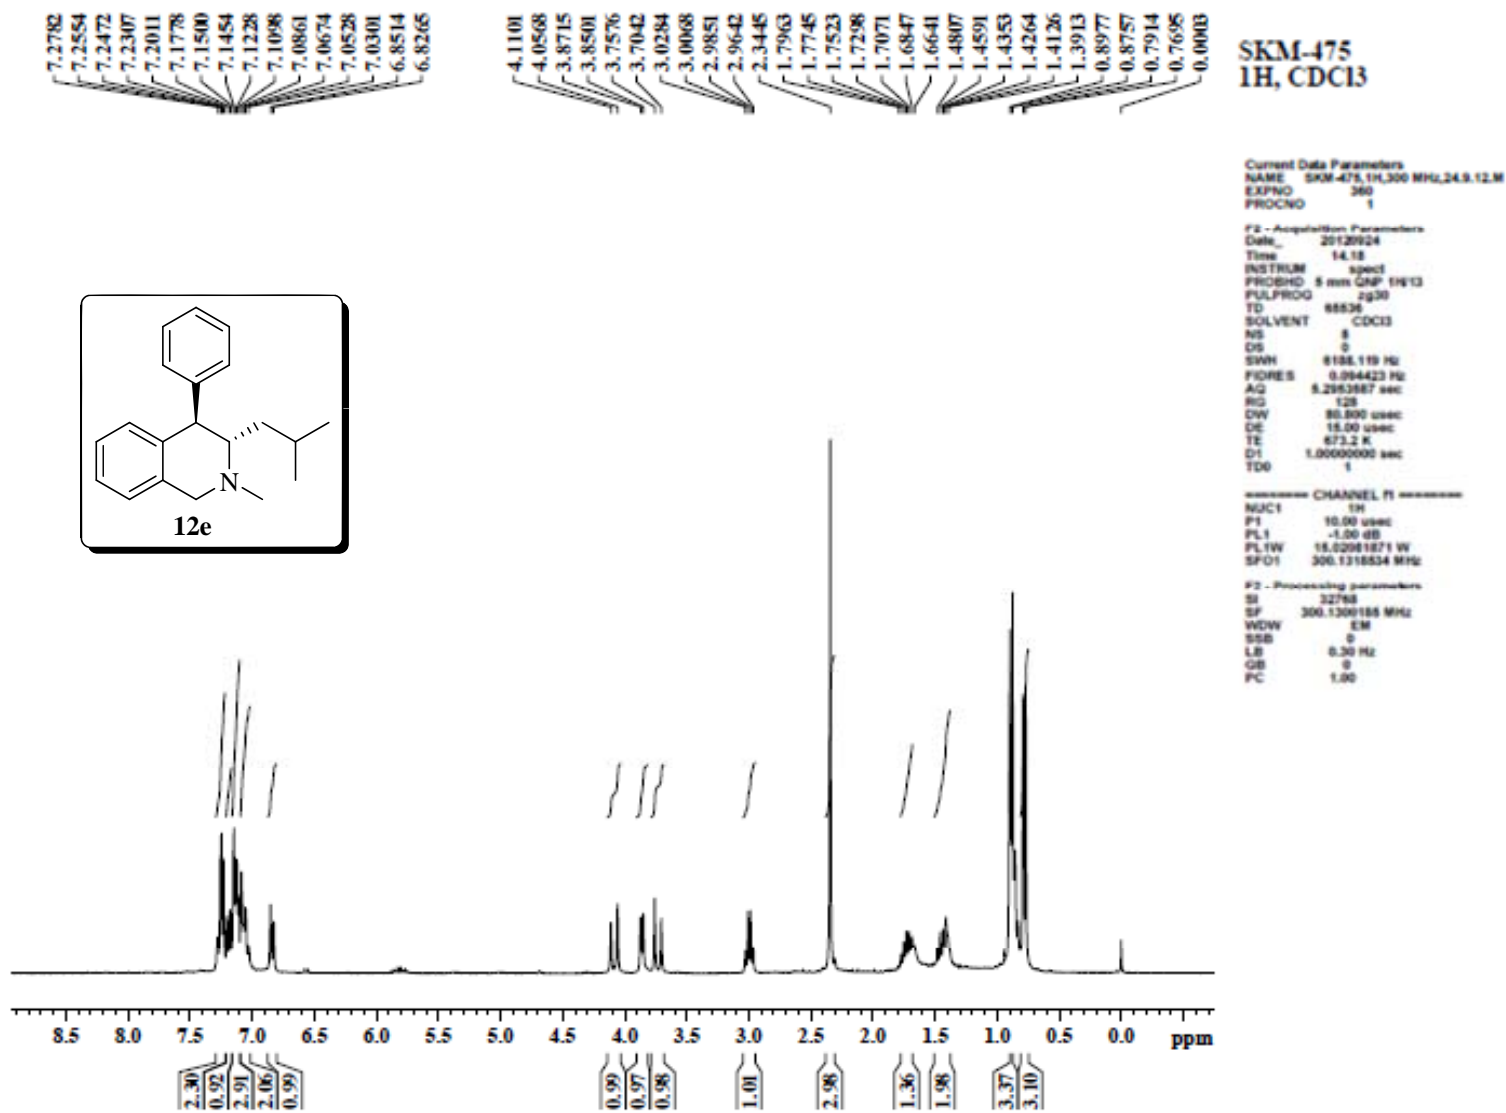

**Figure 180: <sup>1</sup>H -NMR Spectrum of 12e.**



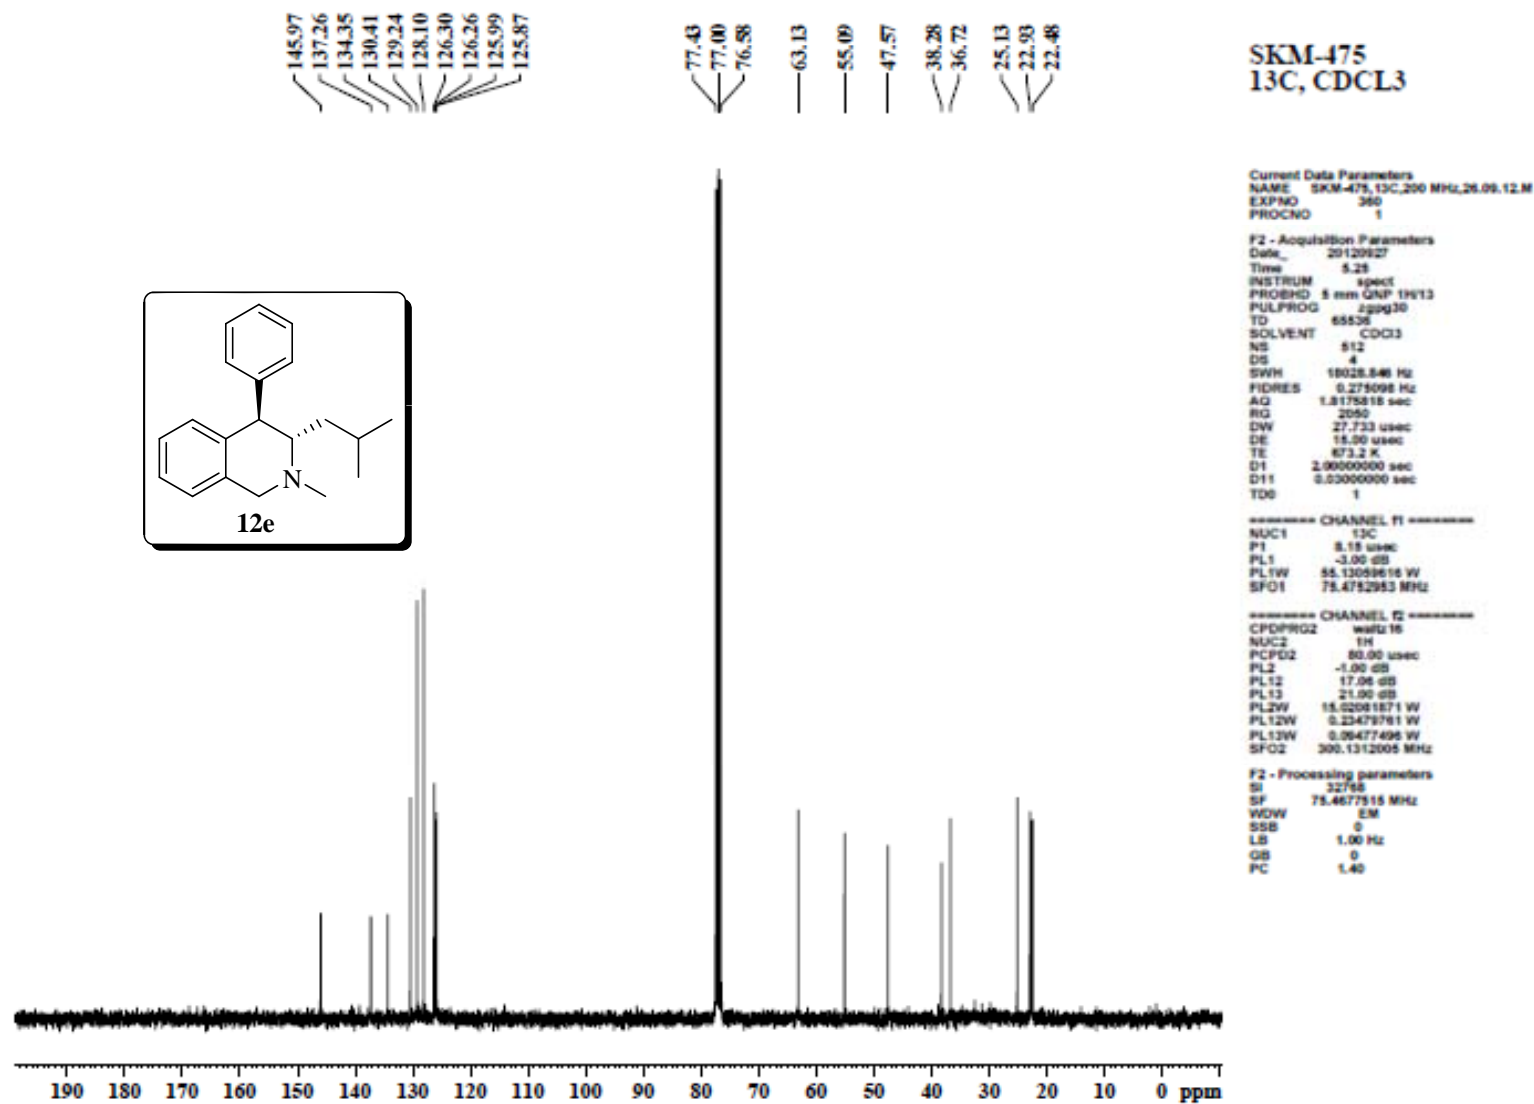

Figure 181:  $^{13}\text{C}$  -NMR Spectrum of **12e**.

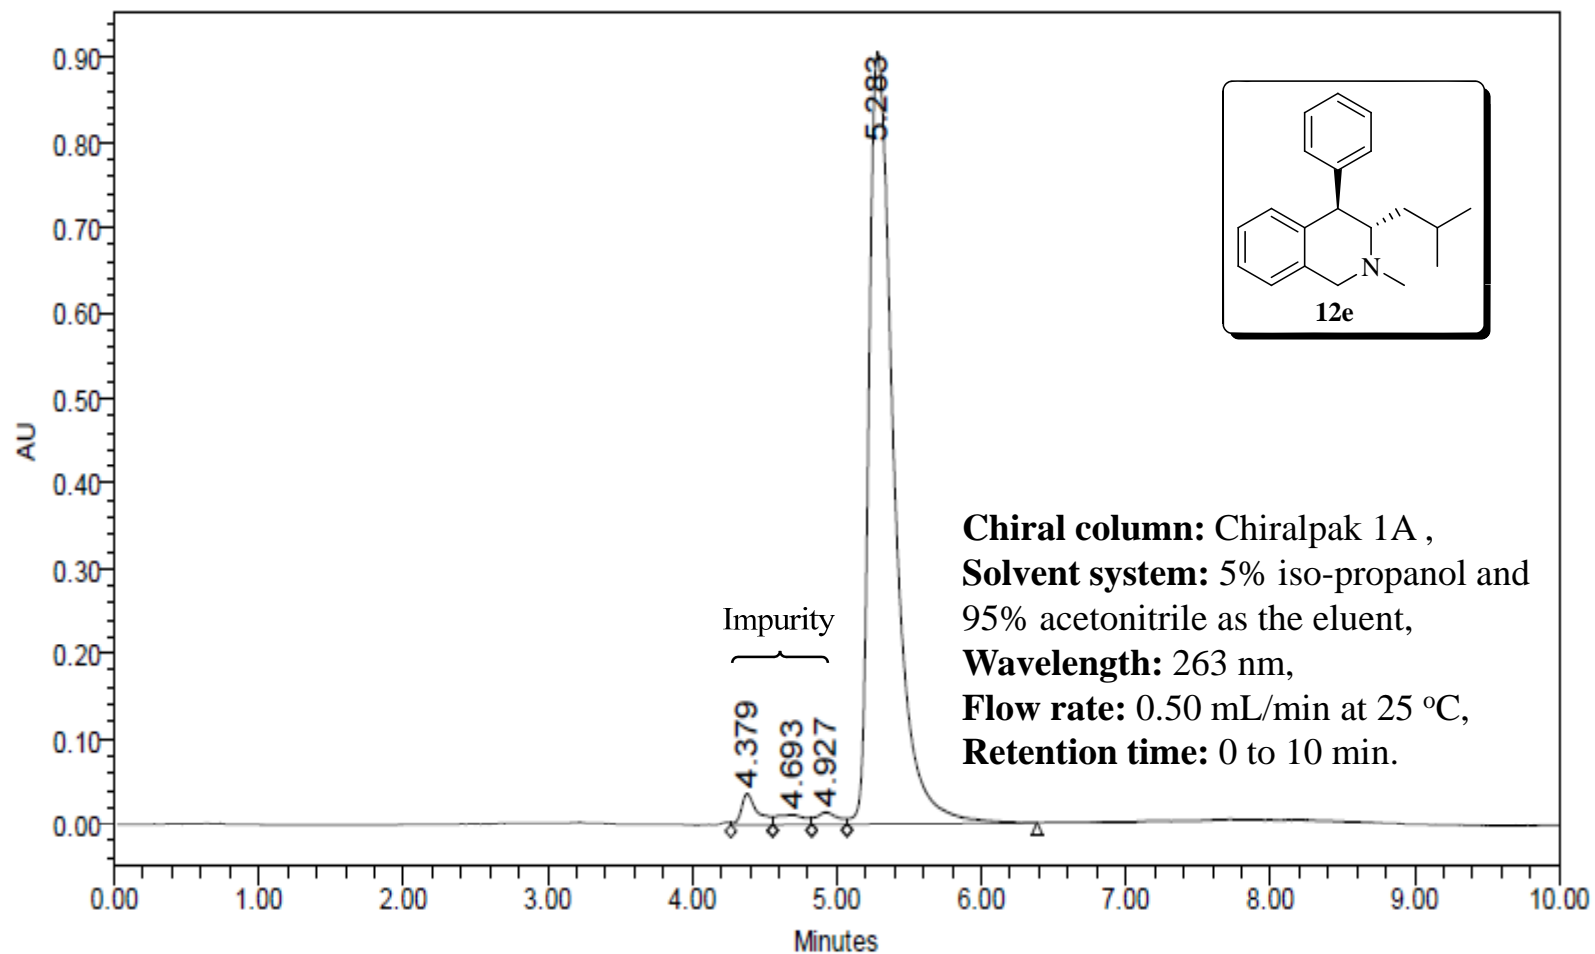

**Note:** The impurity species were collected and found by  $^1\text{H}$  NMR not to contain any isomeric forms of compound **12e**.

**Figure 182:** HPLC -Spectrum of **12e**.

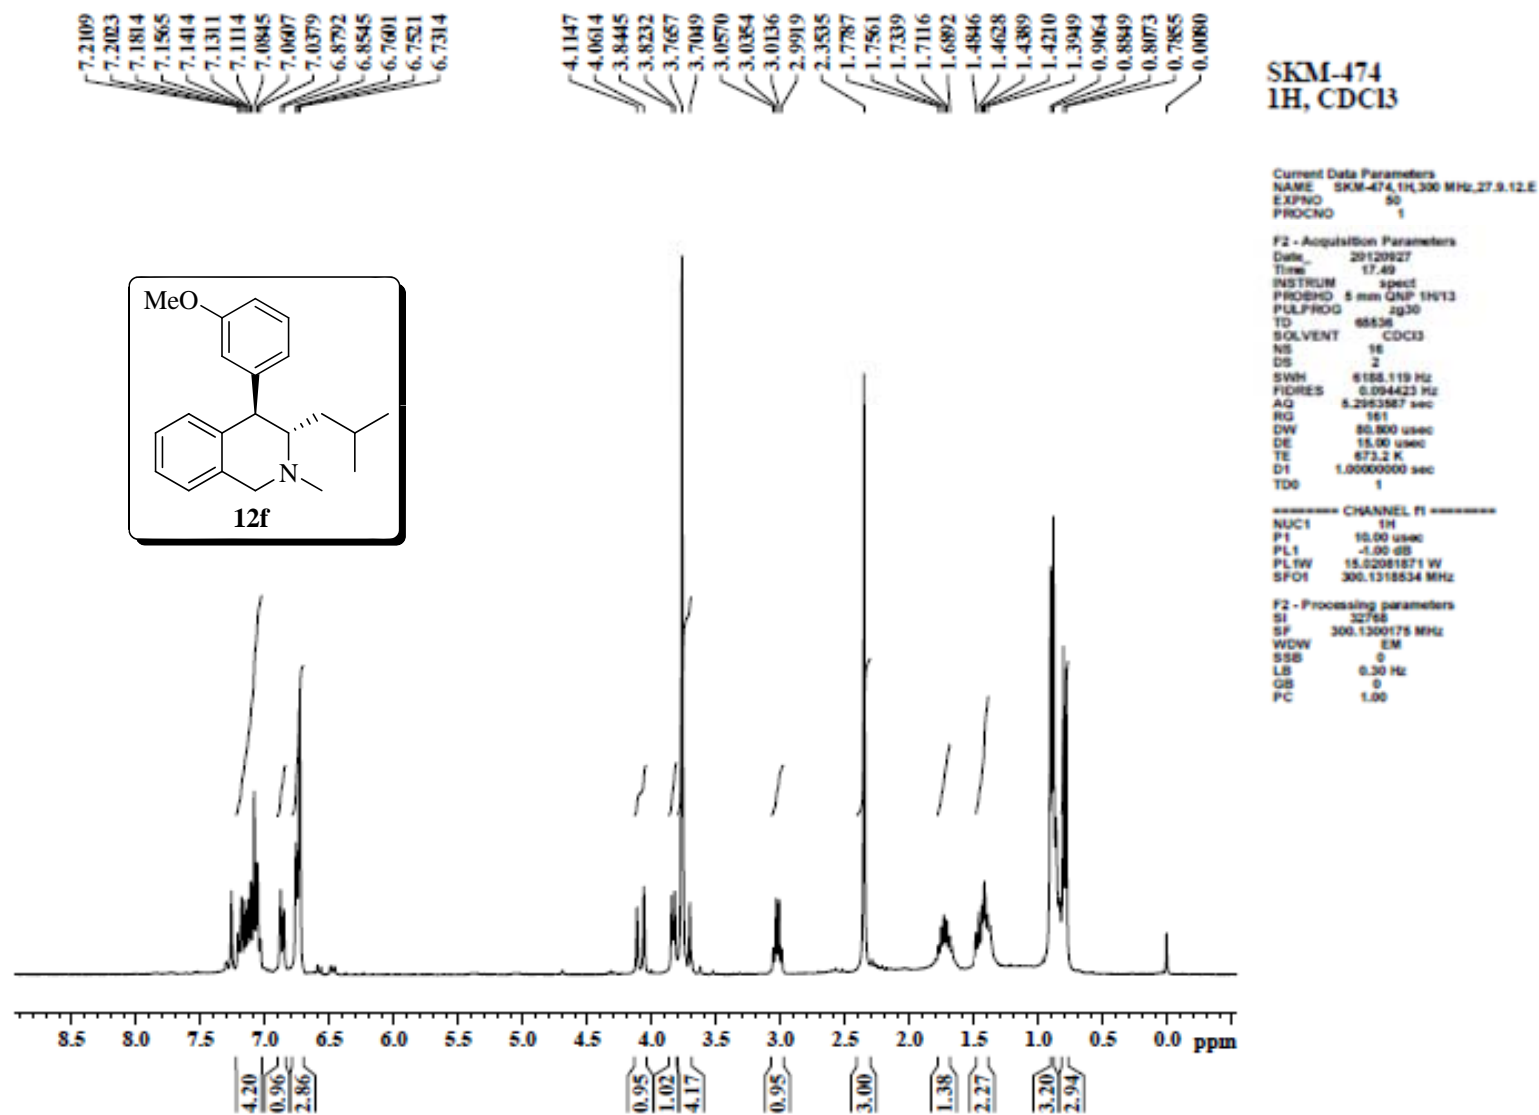

Figure 183: <sup>1</sup>H -NMR Spectrum of 12f.

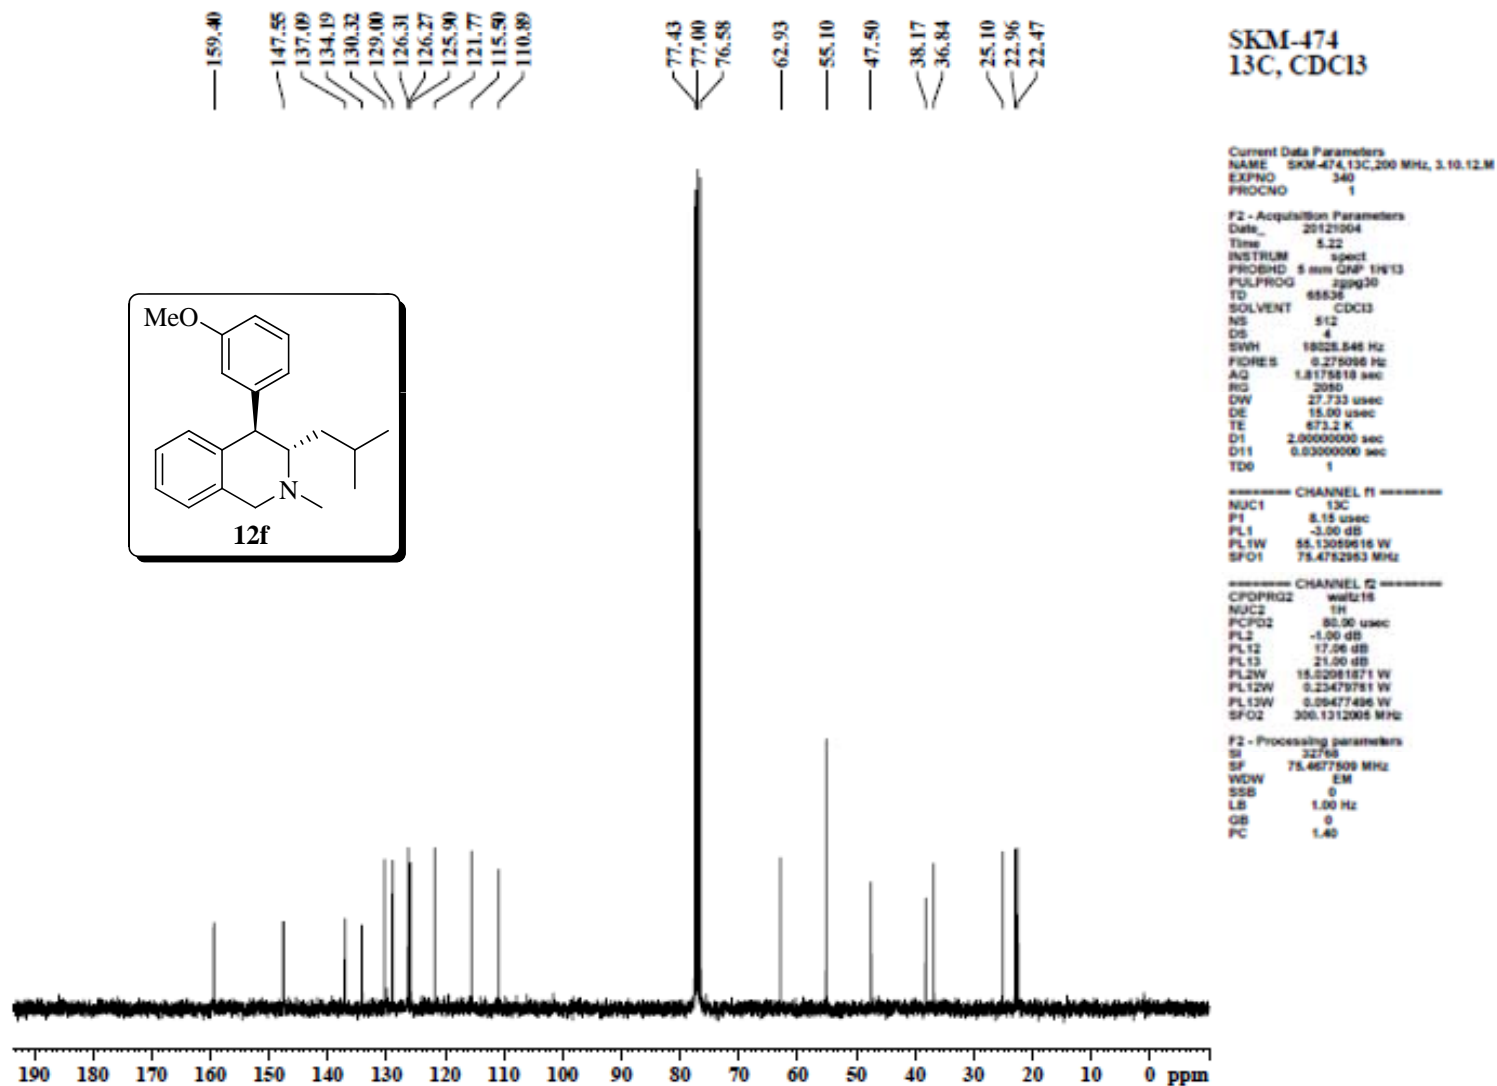

Figure 184:  $^{13}\text{C}$  -NMR Spectrum of **12f**.

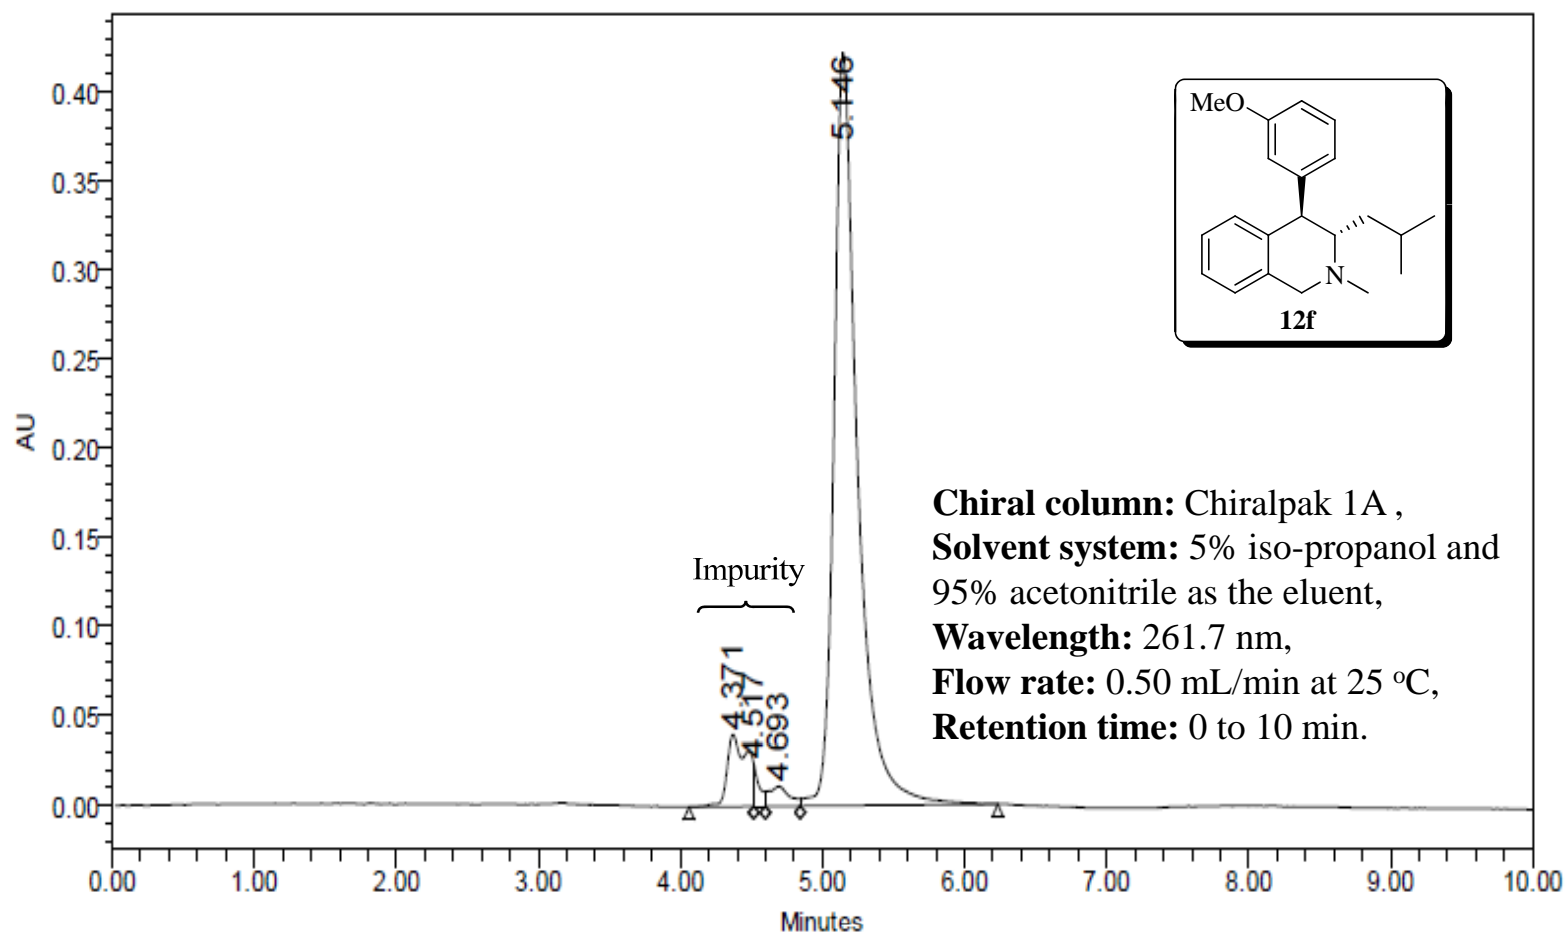

**Note:** The impurity species were collected and found by  $^1\text{H}$  NMR not to contain any isomeric forms of compound **12f**.

**Figure 185:** HPLC -Spectrum of **12f**.

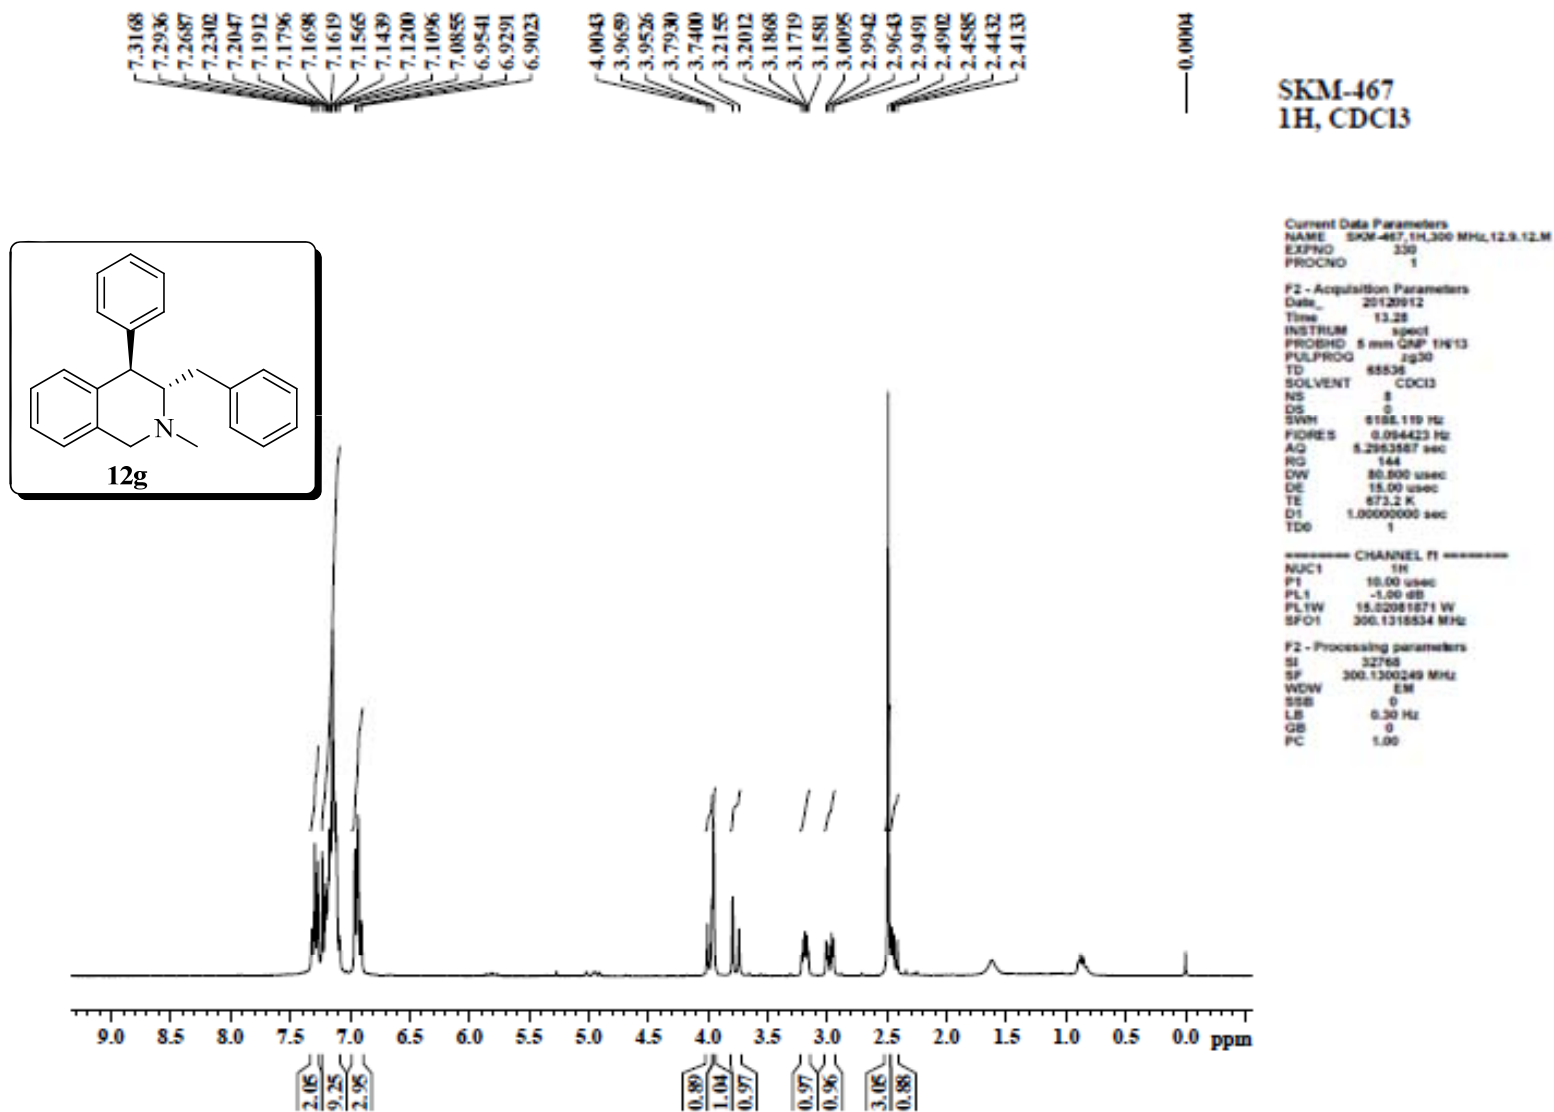

Figure 196: <sup>1</sup>H -NMR Spectrum of 12g.

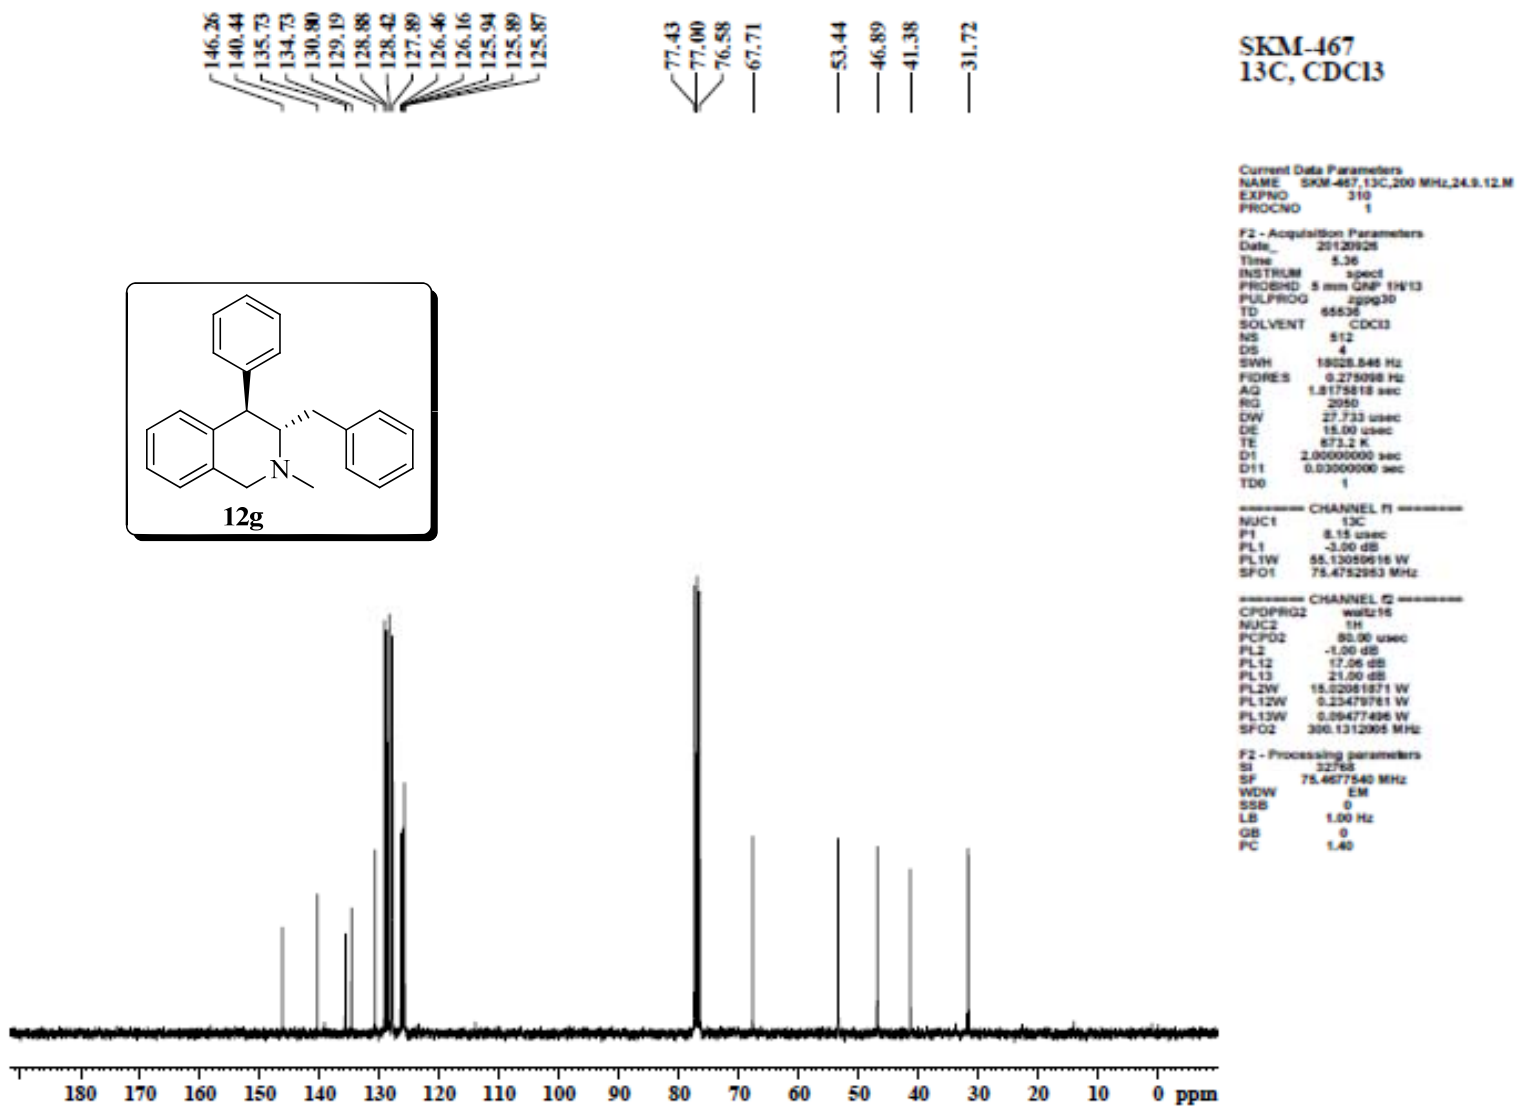

**Figure 187:** <sup>13</sup>C -NMR Spectrum of **12g**.

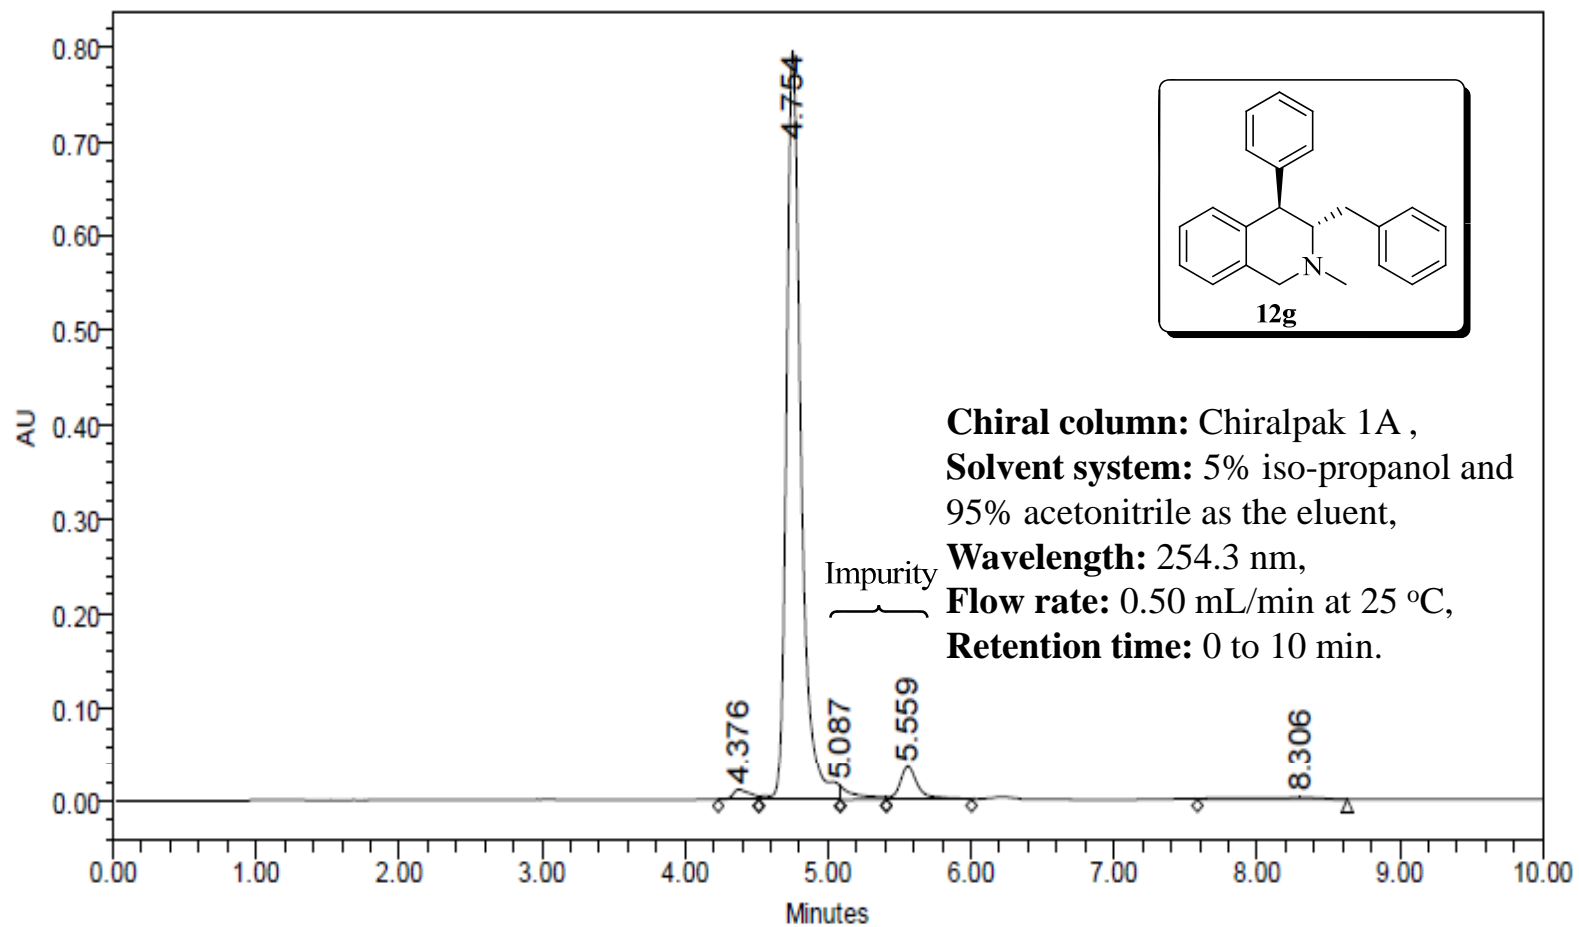

**Note:** The impurity species were collected and found by  $^1\text{H}$  NMR not to contain any isomeric forms of compound **12g**.

**Figure 188:** HPLC -Spectrum of **12g**.



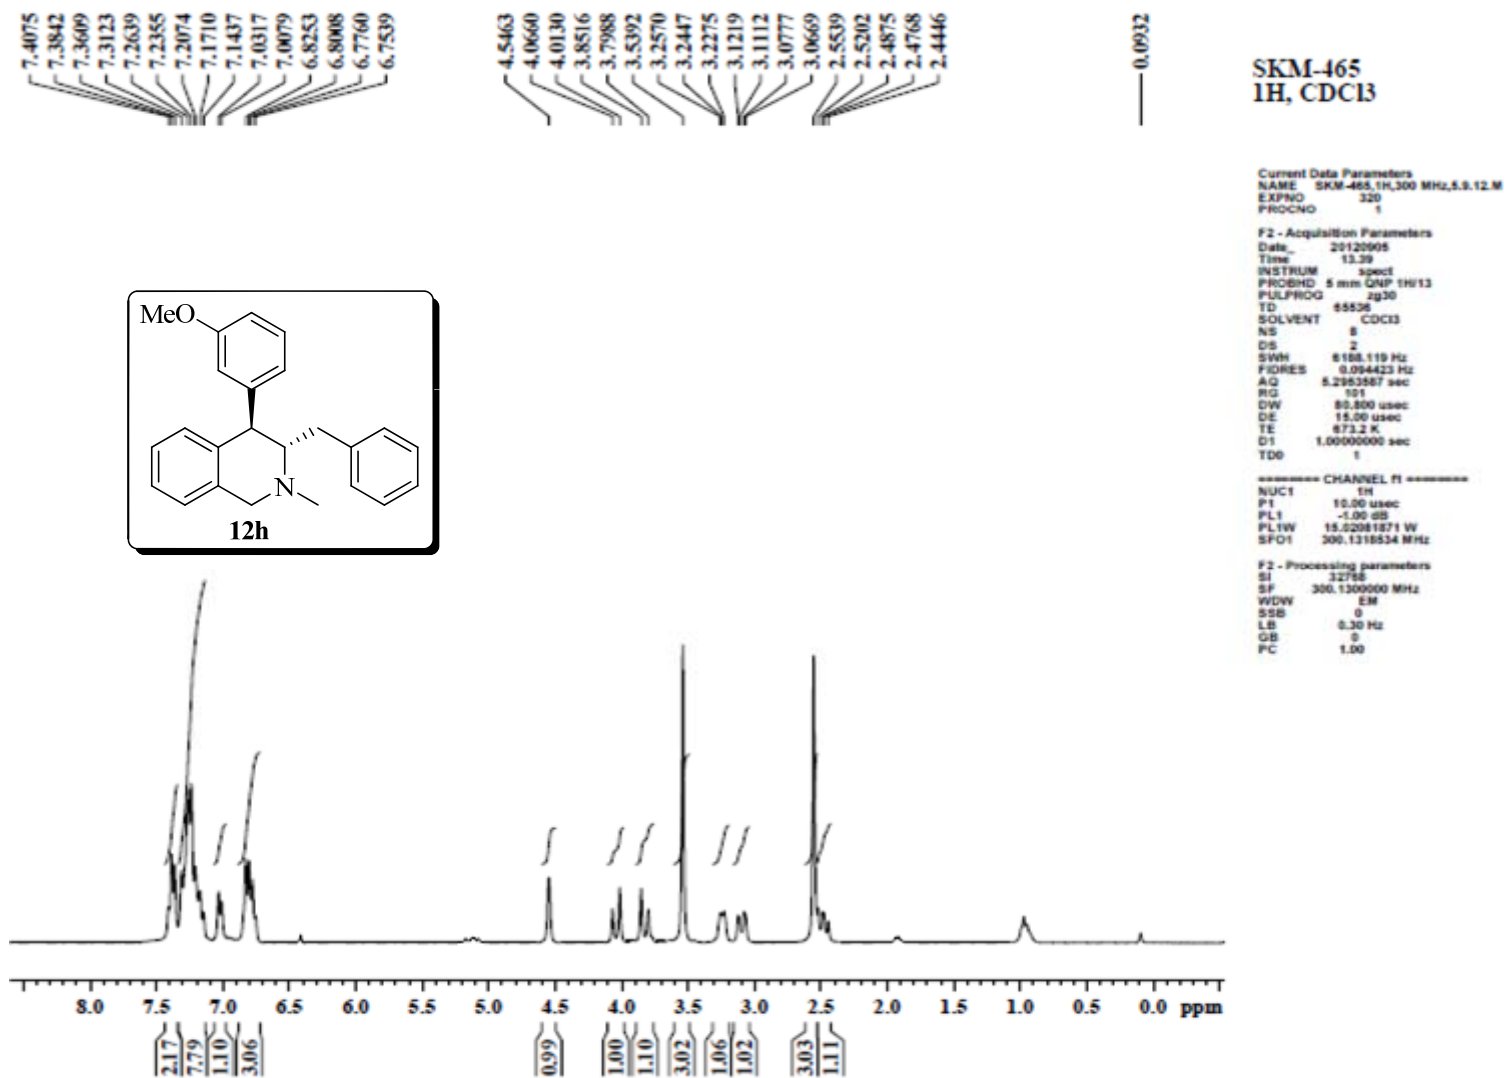

**Figure 189:**  $^1\text{H}$ -NMR Spectrum of **12h**.

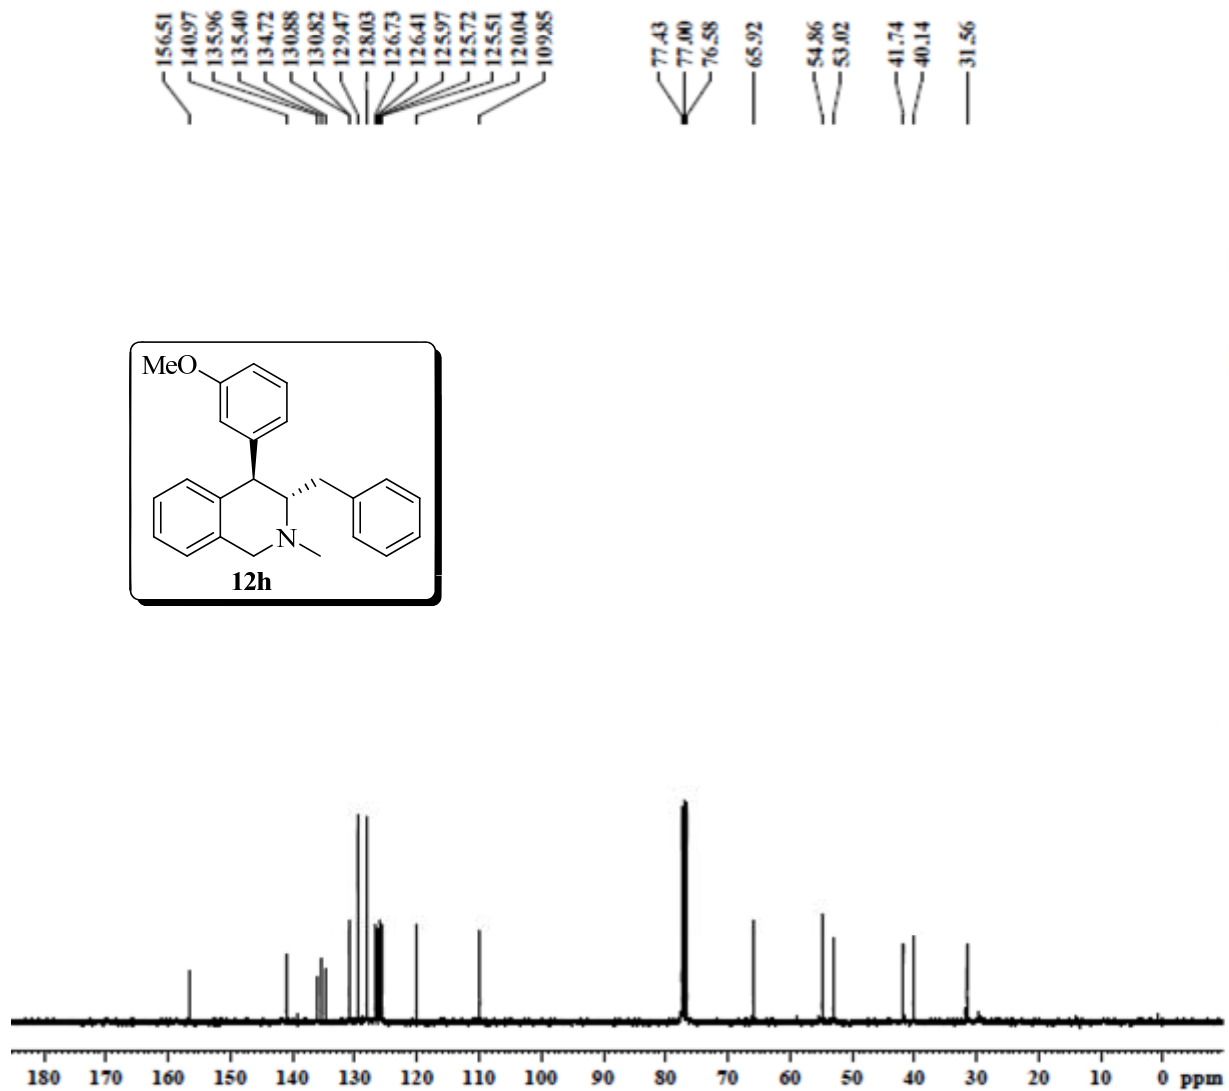

SKM-465  
13C, CDC13

Current Data Parameters  
NAME SKM-465.13C.200 MHz.24.9.12.M  
EXPNO 320  
PROCNO 1

F2 - Acquisition Parameters  
Date\_ 20120926  
Time 6.14  
INSTRUM spect  
PROBHD 5 mm QNP 1H/13  
PULPROG zgpg30  
TD 65536  
SOLVENT CDCl3  
NS 512  
DS 4  
SWH 16025.846 Hz  
FIDRES 0.275098 Hz  
AQ 1.8175818 sec  
RG 2680  
DNV 27.733 usec  
DE 15.00 usec  
TE 873.2 K  
D1 2.00000000 sec  
D11 0.00000000 sec  
TD0 1

===== CHANNEL f1 =====  
NUC1 13C  
P1 8.15 usec  
PL1 -3.00 dB  
PL1W 55.13056616 W  
SFO1 75.4752953 MHz

===== CHANNEL f2 =====  
CPDPRG2 waltz16  
NUC2 1H  
PCPD2 80.00 usec  
PL2 -1.00 dB  
PL2 17.06 dB  
PL3 21.00 dB  
PL2W 15.02081871 W  
PL12W 0.23479761 W  
PL13W 0.59477498 W  
SFO2 306.1312005 MHz

F2 - Processing parameters  
SI 32768  
SF 75.4677544 MHz  
WDW EM  
SSB 0  
LB 1.00 Hz  
GB 0  
PC 1.40

Figure 190: <sup>13</sup>C -NMR Spectrum of **12h**.

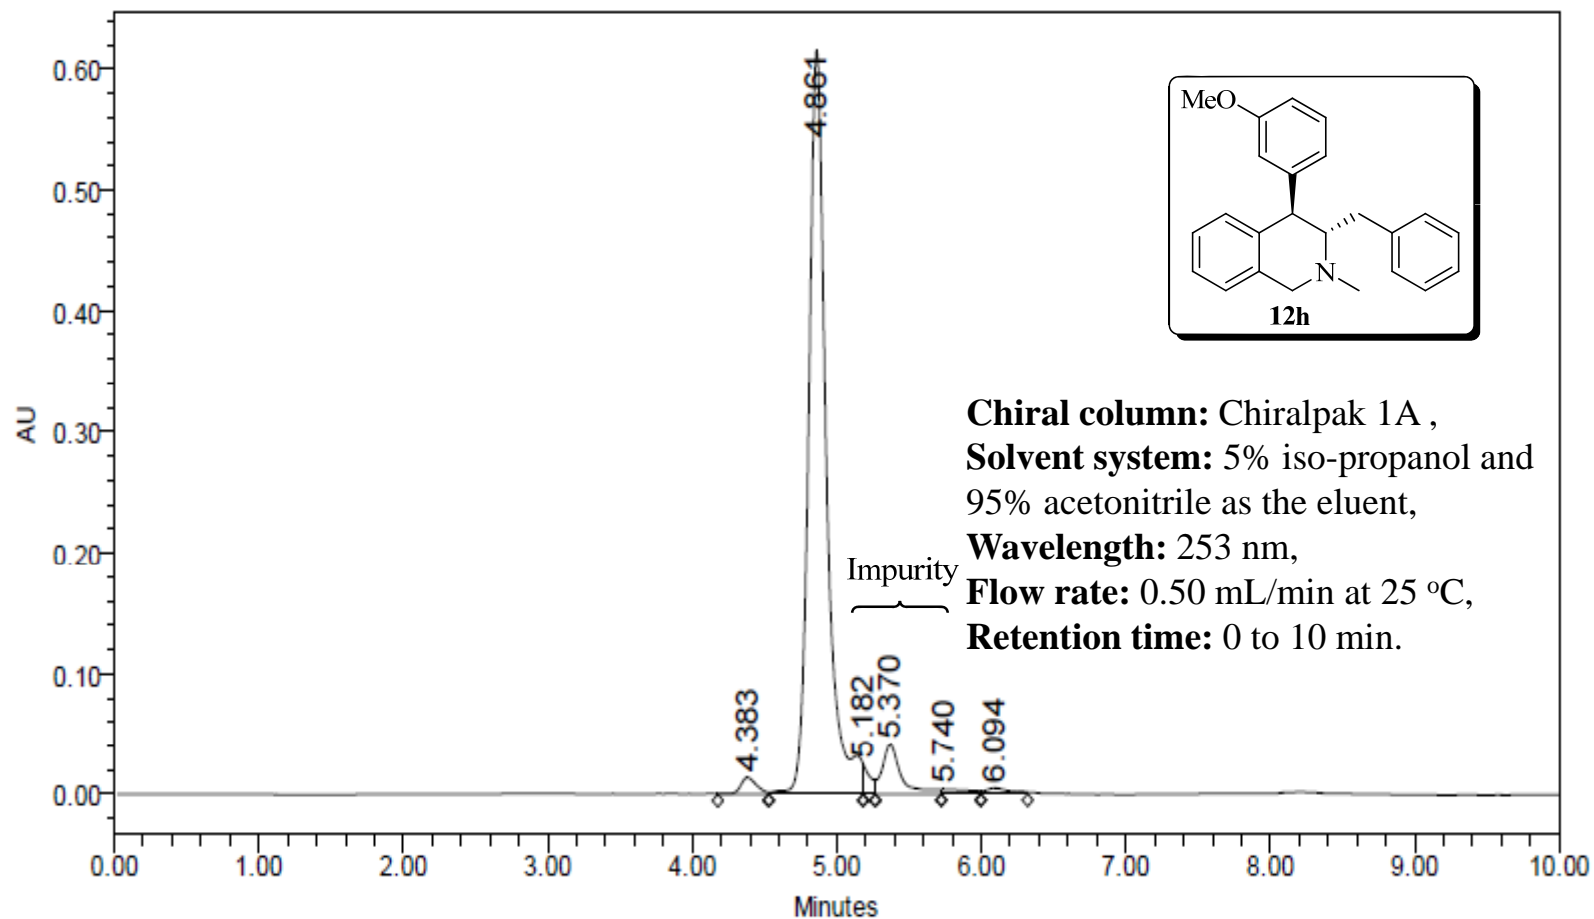

**Note:** The impurity species were collected and found by  $^1\text{H}$  NMR not to contain any isomeric forms of compound **12h**.

**Figure 191:** HPLC -Spectrum of **12h**.

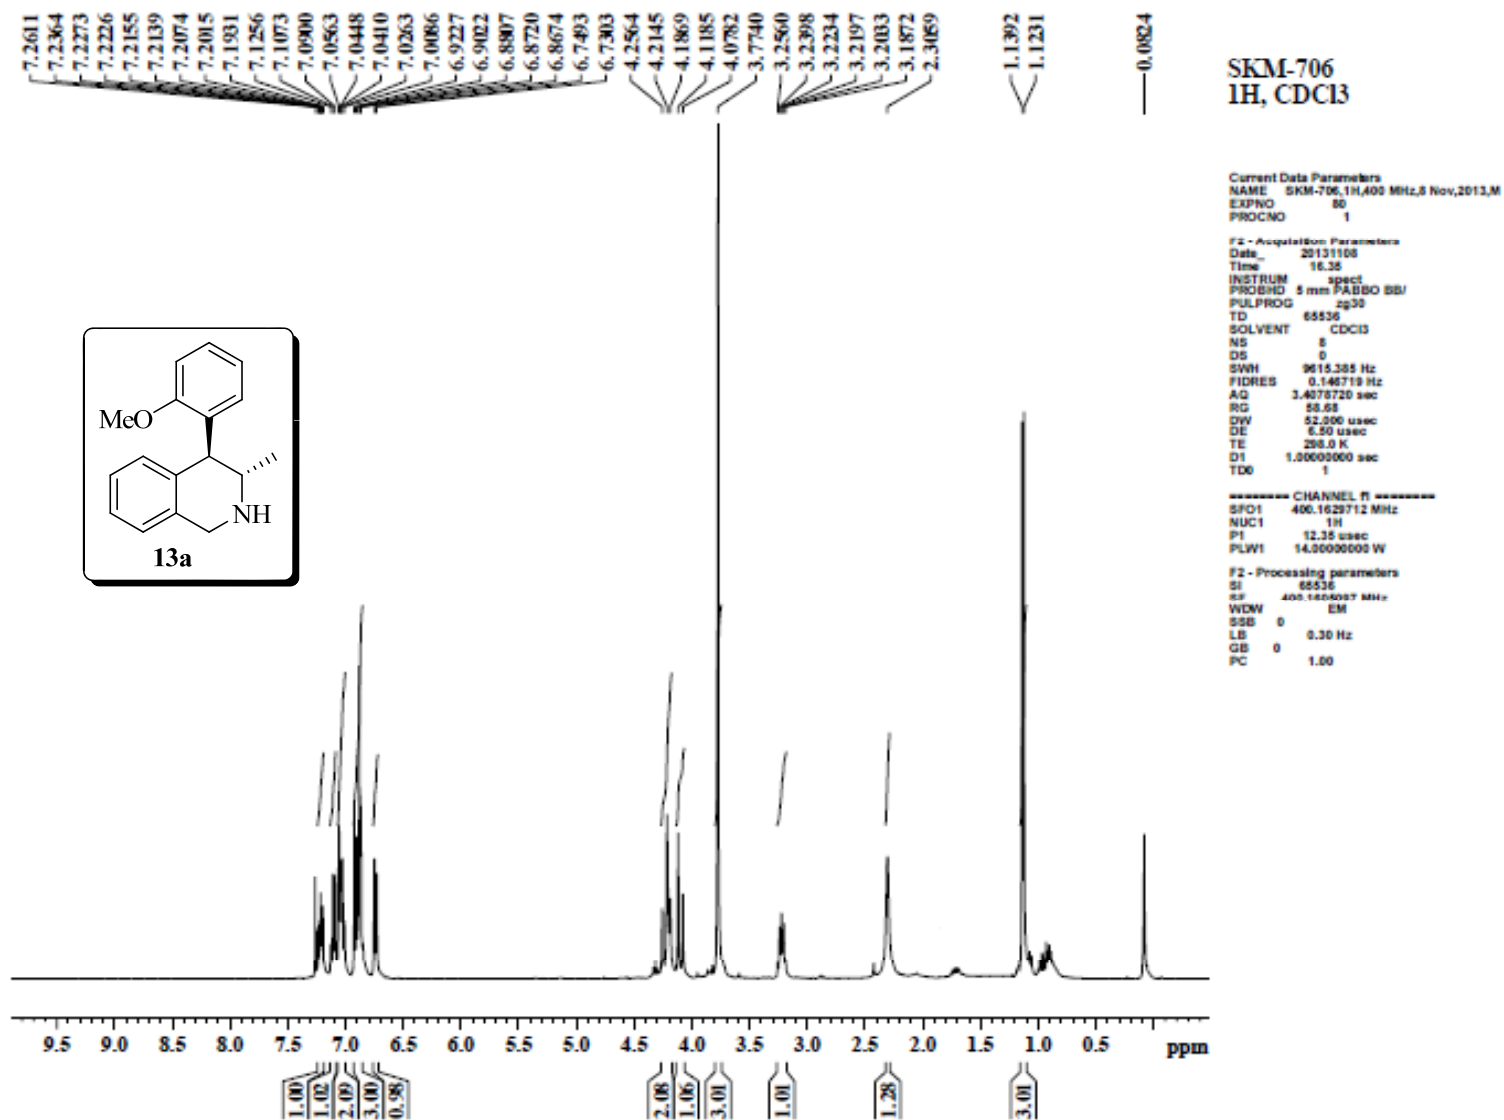

**Figure 192: <sup>1</sup>H -NMR Spectrum of 13a.**

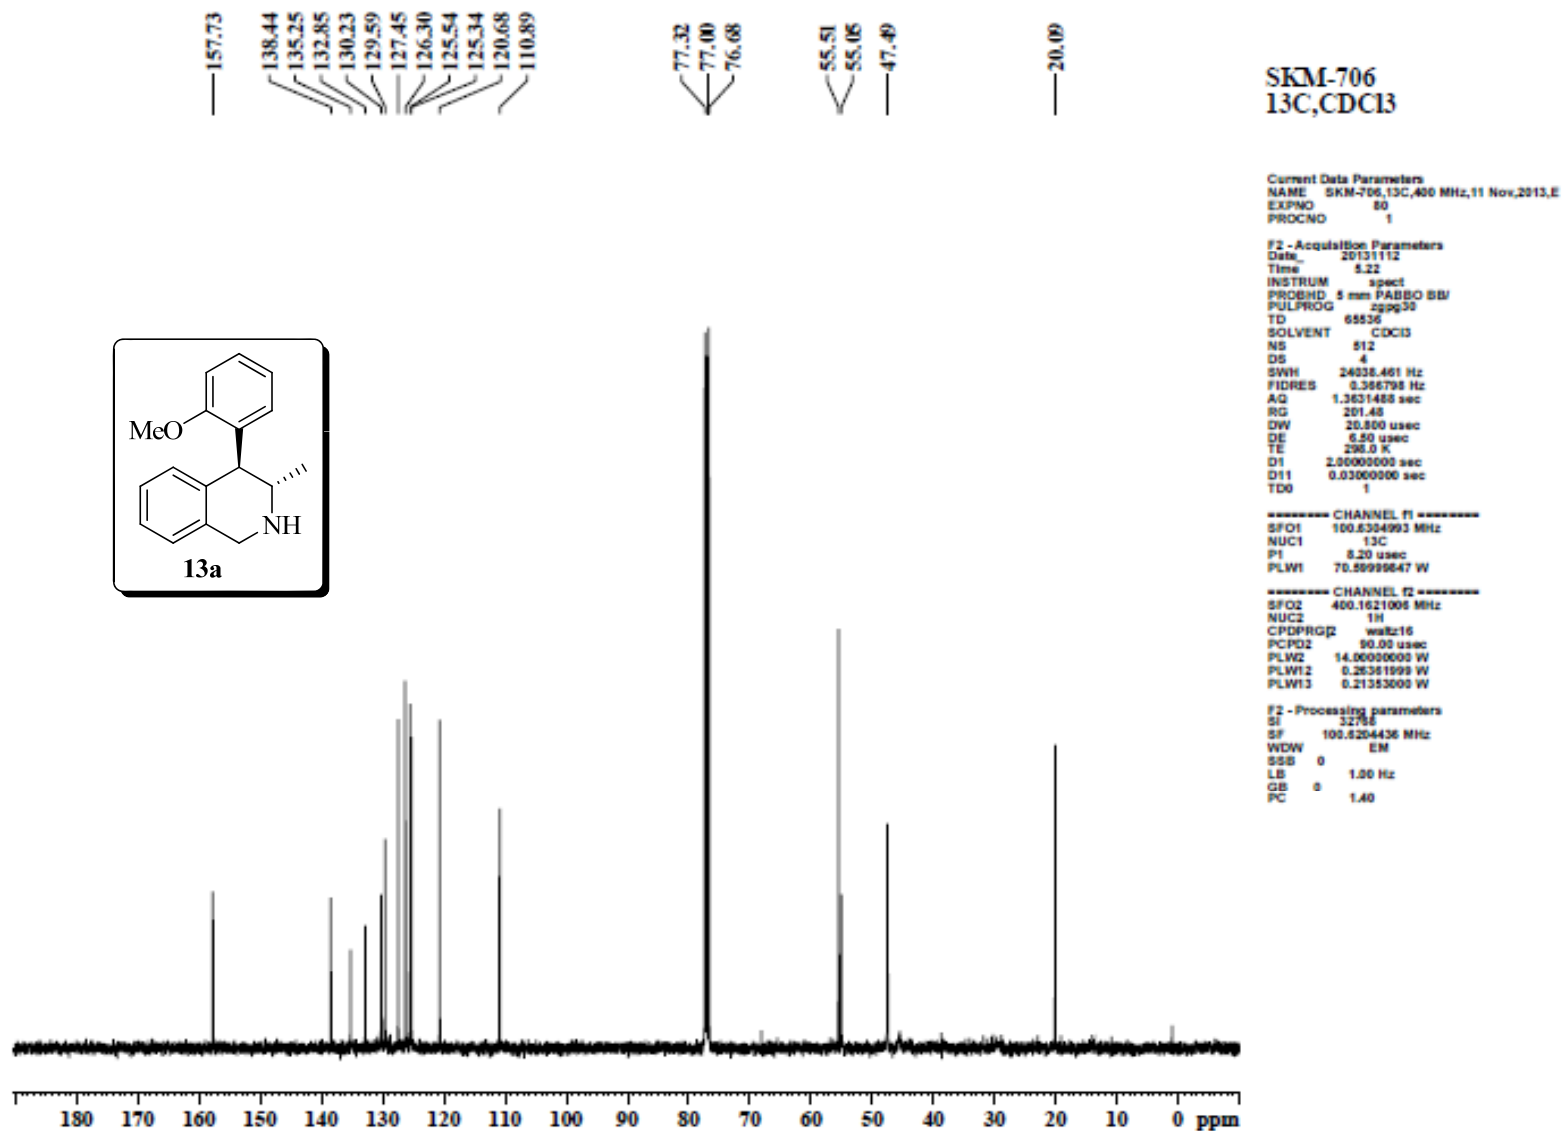

**Figure 193:**  $^{13}\text{C}$  -NMR Spectrum of **13a**.
